# Supplementary material for: Integrated analysis of lymphocyte infiltration-associated lncRNA for ovarian cancer via TCGA, GTEx and GEO datasets
Source: PeerJ. 2020 May 7;8:e8961. doi: 10.7717/peerj.8961 (PMC7211406; doi:10.7717/peerj.8961)
Supplement: Supplemental Information 6 [file peerj-08-8961-s006.xlsx]

## Sheet: Sheet1
	GSM461348	GSM461349	GSM461350	GSM461351	GSM461352	GSM461353	GSM461354	GSM461355	GSM461356	GSM461357	GSM461358	GSM461359	GSM461360	GSM461361	GSM461362	GSM461363	GSM461364	GSM461365	GSM461366	GSM461367	GSM461368	GSM461369	GSM461370	GSM461371	GSM461372	GSM461373	GSM461374	GSM461375	GSM461376	GSM461377	GSM461378	GSM461379	GSM461380	GSM461381	GSM461382	GSM461383	GSM461384	GSM461385	GSM461386	GSM461387	GSM461388	GSM461389	GSM461390	GSM461391	GSM461392	GSM461393	GSM461394	GSM461395	GSM461396
MAST1	4.50933	4.31497	4.54986	4.46078	4.42726	4.55042	4.30313	4.59782	4.45465	3.95886	4.36821	4.17082	4.62756	4.56624	4.21297	4.42415	4.24446	5.28772	4.07789	4.53908	4.68097	4.77247	4.73382	4.58592	4.41954	4.70327	4.68522	4.54986	4.12485	4.79417	5.02589	4.32423	4.86376	4.55081	4.91932	4.69276	4.71675	4.74265	4.6001	4.63978	4.10912	5.3905	5.10385	4.93396	4.77808	4.3277	4.71782	5.19924	4.93702
HBB	6.66695	6.68018	6.81331	6.66108	6.28905	7.20312	6.89976	6.58418	7.47134	6.94079	6.6174	6.63471	6.78805	7.97589	8.53199	6.72243	6.56834	6.74484	6.72118	6.89225	8.13428	7.19347	6.71499	6.68947	6.66746	6.66247	6.95842	6.67	7.64366	6.57853	6.92234	6.8877	6.82815	7.28642	6.91535	9.50432	7.02302	6.44131	6.52818	6.70308	6.4646	6.62708	7.26825	7.16037	6.91884	6.5279	6.05945	6.19085	7.57175
SIRPB1	7.486	7.27089	7.45982	7.47258	7.59471	7.10724	7.40315	7.6878	7.59762	7.13734	7.41671	7.57301	7.32717	6.99396	7.55034	7.23915	7.34668	7.688	7.53737	7.4166	7.53436	7.32578	7.39456	7.32076	7.7245	7.06513	7.13437	6.98596	7.08852	7.50154	7.56115	7.79151	7.68396	7.72915	7.53993	7.74952	7.63806	7.63365	7.6945	7.63309	8.05965	7.50587	6.37844	6.61848	6.15876	6.28675	6.80275	6.42332	6.38657
DIAPH2-AS1	4.3729	4.19193	4.47448	4.11614	4.67504	4.34416	4.01705	4.36764	4.35121	4.36985	4.30978	4.45787	4.3877	4.05702	4.31838	4.21232	4.73313	4.95723	4.22002	4.43737	4.39038	4.89079	4.21721	4.50977	4.48493	4.28353	4.53062	4.1029	4.05414	4.60931	4.19238	4.17819	4.37147	4.97448	4.64729	4.94529	3.88943	4.83886	4.437	4.32333	4.95482	4.90347	3.26539	3.84372	3.30062	3.45965	3.47332	3.6082	3.49362
EPO	4.75842	4.78024	4.83397	4.87171	4.72372	5.01729	4.93458	5.00862	5.09893	4.73434	4.76181	4.98954	5.21339	5.12975	4.84297	4.98594	4.94149	5.04238	4.68725	5.27335	5.09773	5.43897	4.67992	4.98931	4.97444	5.11643	5.15028	4.98276	4.98332	5.15992	5.28757	5.16966	5.32765	5.54712	5.36783	5.21032	4.81598	5.12975	5.09286	4.84631	4.97502	5.04655	5.0992	5.27252	5.01864	5.27652	4.95638	4.8768	4.9744
TMPRSS15	6.4303	6.14764	6.04126	6.60685	6.31731	5.94022	6.22702	6.46683	6.2601	6.069	6.24907	6.49427	6.33413	6.09033	5.97928	6.25126	6.30236	6.45785	6.1021	6.05762	6.28434	6.20874	5.94349	6.24595	6.32318	5.95041	6.04427	6.20945	6.0626	6.16636	6.0901	6.51626	6.14634	6.25744	6.30265	6.04481	5.75479	6.08683	6.1354	6.16527	6.35336	6.32049	5.85396	5.81284	5.56179	5.85	5.72939	5.57799	5.65711
DYRK1B	6.50613	6.23214	6.26297	6.33184	6.16967	6.25091	6.12015	6.54302	6.13968	6.33872	6.3288	6.26851	6.57284	6.60531	6.32644	6.11114	6.19251	6.33525	6.2555	6.19299	6.35309	6.26026	6.27632	6.38439	6.07596	6.02597	6.33872	6.24468	6.1894	6.25508	6.12496	6.71686	6.57003	6.37467	6.50077	6.69715	6.1692	6.18426	6.34813	6.22095	6.47886	6.26895	6.93154	6.4898	6.41398	6.45515	6.45302	6.25796	6.39374
PRAMEF10	5.98648	5.81943	6.54708	5.631	6.30985	5.77121	5.67137	5.99935	6.06083	5.43973	5.60784	5.94282	5.93059	5.77771	5.99655	5.60579	5.68637	5.7527	5.72511	5.72499	6.08776	5.75986	6.14166	5.87581	6.09368	5.92154	5.85628	5.88115	5.25897	6.27723	6.03234	5.52925	6.05756	5.80493	6.29954	6.47093	5.68686	6.06893	5.91433	5.96977	5.81304	5.67702	5.49007	5.49683	5.50568	5.09202	5.32749	5.67137	5.01966
SERHL2	5.65606	5.70463	5.85569	5.84876	5.5185	5.56783	5.85411	5.67593	5.51685	5.64689	5.53161	5.71656	5.8939	6.04662	5.87219	5.66941	5.51055	5.77671	5.83556	5.7119	5.52438	5.76081	5.61936	5.65755	6.03334	5.80731	5.77101	6.45326	6.19842	6.21405	6.09773	5.98829	5.75036	5.96458	5.7852	6.05874	5.74305	5.44316	5.90271	5.71855	6.07889	5.61178	5.66519	6.16982	5.90593	6.09494	5.828	5.5102	5.56349
GABRA5	4.76462	5.03118	4.90861	4.65729	4.97582	4.44548	4.49174	4.93659	5.40803	4.52331	4.74944	5.05037	4.66093	4.94615	4.84953	4.71235	4.71584	5.31699	4.67252	4.602	5.06374	4.54166	4.68196	4.93279	4.83666	4.33506	4.59397	4.87373	4.45786	4.71858	4.84421	4.60077	4.75336	4.77468	4.66049	5.37844	4.66442	5.40043	4.94368	4.94946	5.13648	5.59878	4.38313	4.13828	4.18667	4.19596	4.13277	4.13559	4.28718
NDRG3	9.50627	9.67726	8.47602	10.0181	9.352	9.72253	9.65808	9.48388	9.42841	10.6347	9.5952	10.1791	9.29759	9.54069	9.8566	10.2731	9.32561	9.12414	9.05851	10.1202	9.50496	9.48908	9.94568	9.79224	9.43938	9.83393	9.97828	9.83393	10.5048	9.49749	9.48049	10.4953	9.6511	9.11266	9.48192	9.03046	9.8136	9.2522	9.87094	9.22117	9.18858	9.0284	10.2922	10.3127	10.3368	10.7645	9.80105	10.3784	10.0989
TRPC6	4.00111	3.91862	3.98334	4.1149	4.38432	4.24727	3.92939	4.11782	4.34134	3.98169	4.19704	4.07406	3.91493	3.97457	4.5699	3.79886	4.07285	4.63424	3.98348	4.25916	3.94141	4.28835	4.02844	4.15148	4.78231	3.99658	4.13262	4.11314	3.95411	4.31406	4.61251	4.51804	4.47163	4.59347	4.326	4.54586	4.20852	4.51762	4.28169	4.00034	4.41772	4.35505	3.64716	3.85654	3.66948	3.52822	3.95411	3.47701	4.00222
CEACAM5	6.31535	6.30466	6.418	6.40874	6.29984	6.16216	6.16604	6.26248	6.33086	6.13968	6.09162	6.26142	6.23738	6.20181	6.15418	6.15314	6.24026	6.21978	6.03308	6.19896	6.19201	6.49962	6.2642	6.04642	6.00525	6.25828	6.34653	6.39705	6.35985	6.0539	6.47506	6.27213	6.44849	6.47506	6.4866	6.56636	5.83375	6.23065	6.25257	6.16068	6.44476	6.16643	6.46035	6.43344	6.34183	6.26263	6.19535	6.49815	6.22127
OR2F2	3.45555	3.6996	3.59625	3.38676	3.60116	3.30381	3.36684	3.27883	3.52671	3.42982	3.26146	3.41621	3.29442	3.42745	3.45221	3.35494	3.397	3.47324	3.30375	3.50221	3.41534	3.58927	3.70067	3.50836	3.59265	3.25192	3.54834	3.4724	3.47725	3.64953	3.40243	3.35701	3.57919	3.82034	3.63361	3.51761	3.45414	3.86664	3.68187	3.55318	3.53272	3.65546	3.30623	3.37409	3.3673	3.30888	3.18191	3.39969	3.29994
ADCY10	4.58371	4.79964	4.70094	4.6111	4.87348	4.34826	4.32194	4.82208	4.80309	4.60553	4.69715	4.78321	4.80708	4.3162	4.79541	4.48129	4.91796	4.69927	4.5536	4.79356	4.81221	4.76753	4.46308	4.98765	4.76764	4.62305	4.65409	4.36832	4.55025	4.58188	4.70653	4.67761	4.75722	4.91088	5.05014	4.64407	4.6389	4.99305	4.84221	4.59708	4.91263	4.61033	4.1102	4.32623	4.07787	4.00008	3.93032	4.03113	4.3347
OR1F2P	5.34115	5.44051	5.4071	5.44553	5.68045	5.43832	5.31408	5.61141	5.30165	5.25322	5.03244	5.51504	5.37012	5.01287	5.39869	5.31413	5.70262	5.32832	5.23308	5.15391	5.22455	5.43525	5.03059	5.24061	5.14939	5.11422	5.13989	5.24645	5.24192	5.33709	4.99226	5.07203	5.01253	5.02128	5.3104	5.39018	5.09945	4.96748	5.01411	4.97821	5.0561	5.5544	5.04797	5.07939	4.99038	4.937	4.93166	4.85011	4.8237
COL7A1	6.37133	6.37243	6.23935	6.38703	6.52676	6.22582	6.61026	6.07209	6.20465	6.39533	6.3645	6.35576	6.09652	6.38458	6.80541	6.49595	6.31149	6.60555	6.23023	6.26141	6.45344	6.38895	6.68617	6.58884	6.26905	6.57675	6.4071	6.80705	6.20603	6.11588	6.83706	6.62624	6.64915	6.52073	6.12761	6.3694	6.26141	6.40375	6.46794	6.45963	6.63223	6.68594	6.58865	6.74749	6.4942	6.31935	6.18455	6.79932	6.30647
OR7A10	4.11953	3.96579	3.98589	4.37466	4.07457	4.03918	4.20139	3.97574	4.03945	4.01055	4.08794	4.20939	4.13826	4.10055	3.97738	4.10654	4.0009	4.31148	4.05564	4.15358	4.16628	4.40727	3.78458	4.01998	3.95541	4.15761	4.11214	4.18285	4.48042	4.14506	4.0817	4.55274	4.05098	4.2869	4.28572	4.11557	3.92304	3.98972	4.11724	4.13826	3.98465	4.20778	3.96116	4.08794	4.10121	4.1445	4.19328	3.94228	3.98618
KRT3	4.62042	4.64502	4.2186	5.00977	4.42278	4.35848	4.07809	5.05582	4.5254	4.07343	4.46572	4.36384	4.40955	4.09503	4.17211	4.41294	4.35848	3.94724	4.07723	4.44202	4.03304	3.88312	4.31542	4.49705	4.33827	4.04149	4.25471	4.20883	4.2644	3.91559	4.0876	4.59107	4.64976	4.6031	4.61382	4.49686	4.16305	4.20065	4.34424	4.69311	4.1524	4.51828	4.63195	4.42039	4.31832	4.4746	4.35848	4.60765	4.70722
CTAGE11P	4.61874	4.44115	4.62958	4.89808	4.45908	4.97413	4.99009	4.61874	4.59976	4.59454	4.65635	4.76535	4.90265	4.75489	4.46226	4.83747	4.60675	4.82267	4.83878	4.72041	4.70033	4.71669	4.51114	4.69904	4.82505	4.62475	4.72667	4.57967	4.55933	4.75191	4.51455	4.49901	4.84326	4.69774	4.75052	4.76694	4.2341	4.31008	4.42666	4.87487	4.79407	4.87068	4.56639	4.56768	3.80896	4.48995	4.25788	4.26823	4.35618
OR2J3	3.9127	3.90305	4.23379	3.66933	4.00359	4.19779	4.02354	4.00588	4.084	4.05532	4.05738	4.07174	4.24174	4.04313	4.13006	3.91972	4.17795	4.12233	3.93377	4.23301	4.02097	4.30861	4.44325	4.06729	4.13632	4.01587	3.99753	4.02956	3.99108	4.05328	4.24314	3.71158	4.37768	4.53068	4.45012	4.66798	3.94816	4.03877	3.99273	3.99026	4.0174	4.47494	3.60213	3.78052	3.64052	3.79341	3.76846	3.41215	3.68735
KRT19P2	5.11106	5.29759	5.65933	4.71418	4.6577	5.24583	5.28589	4.778	4.99772	5.02114	5.15495	5.17588	5.25853	5.37369	5.04205	5.28295	5.28999	5.16519	5.15769	5.64783	5.10763	5.29014	5.26962	5.27191	5.59679	5.58979	5.48909	5.75508	5.52556	5.60023	5.27507	5.28812	5.30979	5.13418	5.52368	5.72291	5.35543	5.33624	5.36791	5.35637	4.97426	5.36392	5.05285	5.05845	5.27916	5.21777	5.05639	4.92188	5.15828
LINC01949	4.90464	5.20623	5.49123	4.89937	5.10224	5.01714	5.40186	5.19994	5.23607	5.07988	5.29094	5.04296	5.49135	5.0156	4.82832	5.16361	5.10711	5.10455	5.07637	5.69789	5.23579	5.59581	6.03097	5.71074	5.28564	5.31401	5.1795	5.26088	5.34395	5.64141	6.06795	5.60935	5.33637	5.55117	5.31108	5.13885	5.08927	5.51274	5.37311	5.11485	5.11552	5.64763	5.04246	5.0263	4.77737	5.05303	4.78428	4.74765	4.93477
PRICKLE3	4.23002	4.14625	4.21602	4.17026	4.32983	4.28666	4.2772	4.18392	4.55248	4.02316	4.24024	4.36982	4.219	4.2011	3.97755	4.16626	4.27615	4.10848	4.03856	4.41035	4.03428	4.09107	5.26957	4.27717	4.23844	4.28063	4.13777	4.57822	4.1266	4.30476	4.6035	4.64891	4.29272	4.5652	4.31442	4.07771	4.13235	4.34485	4.2265	4.47537	4.49689	4.21955	5.09048	4.30896	4.59019	4.59231	4.45953	4.62626	4.76231
HLA-DRB6	10.6591	8.90338	9.47199	9.32565	8.23508	9.16684	9.21894	7.65559	8.27488	9.8056	7.3521	9.05786	9.50968	9.01079	9.86702	7.10235	8.16939	8.56142	9.12216	8.22553	9.22818	8.84145	8.84479	7.2508	8.94116	9.36636	8.07705	10.1337	10.5087	9.49251	9.28966	9.77001	9.09296	8.70035	8.31064	8.32301	7.63406	9.0747	8.34829	8.40194	7.79858	8.54898	9.97716	10.4943	8.80166	9.0409	7.52862	8.53117	9.01079
PRAMEF11	6.17414	6.26049	6.73529	5.9247	6.27845	6.08594	5.72616	6.14134	6.32019	5.50093	6.03962	5.96653	6.27129	5.83453	5.98345	5.7964	6.20503	6.03642	5.80611	6.3258	6.4478	6.46096	6.0781	6.33606	6.38323	6.00124	6.15018	6.06546	5.8982	6.31946	6.35849	5.77859	6.34418	6.63648	6.51523	6.51941	6.11382	5.91024	6.34641	6.16146	6.4436	6.54374	4.65112	5.31922	4.3827	4.56191	4.59272	4.55267	5.10425
ZHX3	5.04824	5.62115	5.27958	5.90682	5.39847	4.93785	5.28822	5.07915	5.15095	5.53522	5.36221	5.70508	5.5225	5.09549	5.46396	5.8364	5.594	5.08993	5.21877	5.3905	5.69833	5.37892	5.02332	5.37436	4.96787	5.0838	4.65375	5.11869	5.5562	4.72334	5.43303	5.94082	5.00838	5.04043	4.97075	4.82158	5.17388	5.16221	5.32113	4.99075	4.72678	5.03188	5.83526	5.49562	5.43738	5.90057	5.37496	5.94051	5.64027
LOC100289473	5.82484	5.92468	6.06836	5.92227	5.76251	5.66499	5.97004	5.51655	5.9219	5.71578	5.46752	5.98058	5.91041	5.90808	5.85985	6.03144	5.77177	6.03677	5.61463	6.1108	6.44136	6.25992	5.95832	5.92344	5.83359	5.75388	6.13955	5.64109	6.00705	6.32344	5.92369	5.90784	6.17527	6.46146	5.92774	6.82121	6.25741	5.7191	5.81152	5.70569	5.95731	5.88233	5.00245	4.6124	4.89876	4.62811	4.74079	4.93465	4.36268
UBE2NL	9.65787	9.48334	9.47347	9.75592	9.43781	9.61044	9.21989	9.4209	9.5102	9.56999	9.43915	9.50246	9.32676	9.34895	9.48489	9.49887	9.42571	9.56181	9.48464	9.39661	9.36177	9.50687	9.407	9.31281	9.56809	9.45338	9.75583	9.86429	9.2686	9.48887	9.73845	9.34217	9.3248	9.59366	9.56403	9.57574	9.57155	9.18693	9.43442	9.43647	9.41938	9.39136	8.91916	9.44929	8.75264	9.20162	9.30512	9.09547	9.22136
MT4	7.17455	7.70133	7.29672	7.43801	7.34328	7.16748	7.3452	7.19718	7.45003	7.34386	7.07482	7.27467	7.11515	7.05173	7.06786	7.14094	7.18781	7.13056	7.30818	6.8912	7.07177	6.92121	6.92863	7.13567	7.05738	7.1271	7.18597	7.11739	7.33578	6.70164	7.05951	7.40291	6.90225	6.61096	7.11596	6.85243	6.85375	6.89957	6.85401	7.01493	7.02812	7.12093	6.92266	6.95867	6.58042	6.68159	6.68364	6.65818	7.11781
MRPS18B	11.3802	10.1379	9.55783	11.2769	9.79425	9.98603	10.7328	10.5626	9.74288	12.0429	9.75312	10.5084	9.99529	10.8929	10.2974	10.9502	9.98928	8.82292	11.0171	9.53394	9.43018	9.54195	9.45406	10.4008	10.1134	10.6975	10.3539	11.2077	10.6775	9.97951	10.0941	11.2676	10.7388	9.28803	10.0008	9.55961	10.2311	9.28561	9.85925	9.66975	9.21222	9.32332	10.6831	11.09	11.2996	10.7801	10.9606	11.6738	10.9538
TNXB	5.65941	5.55595	5.29695	5.68124	5.56543	5.4641	5.48951	5.47529	5.81354	5.74381	5.47274	5.80363	5.52458	5.32837	5.71389	5.54041	5.44745	5.42513	5.22878	5.61022	5.48933	5.4834	5.39863	5.56763	5.43095	5.41852	5.38859	5.45617	5.33073	5.37693	5.51342	5.72313	5.68707	5.6911	5.62154	5.50452	5.2296	5.20796	5.3205	5.86205	5.30623	5.82013	5.96322	5.81822	6.37828	5.75313	5.70069	5.89649	6.04631
PIWIL2	5.29705	5.76205	5.96989	5.47501	5.80853	5.56092	5.55171	5.89024	5.75738	5.47879	5.59451	5.89644	5.70942	6.00638	5.65135	5.5611	5.88651	5.92237	5.56831	5.42108	6.08994	6.02467	5.55036	6.0478	5.71059	5.93362	6.0177	5.90818	5.63315	6.01372	6.367	5.49558	6.10139	5.93875	6.05143	5.81289	5.64199	5.93562	5.60548	6.01106	5.67382	5.43099	5.55878	5.03841	5.17048	5.30056	5.10685	5.33863	5.17504
HIRA	6.38916	6.82949	6.60448	7.28889	5.73447	7.25097	6.0703	5.82606	6.50139	6.95296	5.67017	7.52322	5.63501	7.29452	6.86379	6.68139	6.48162	6.83467	4.8145	6.34959	6.19698	6.84865	6.18263	6.30866	7.29208	5.95324	6.85922	7.16414	7.67832	7.18401	6.66028	7.96137	6.28162	6.60607	5.64807	5.21928	6.63812	5.91016	7.51506	6.711	5.99667	5.94242	6.37352	7.05896	7.57726	7.73196	7.2793	7.63195	8.74414
HLA-J	10.5198	9.56127	8.52138	8.23494	8.69629	8.47437	9.14617	8.03576	8.43688	8.95991	8.05614	8.33012	7.78723	9.43959	9.21485	7.87031	8.22526	7.78372	8.81645	8.82947	8.22526	9.18271	7.87558	7.28253	8.63656	8.48459	7.76804	9.3909	8.97968	8.80616	8.87705	9.85058	8.5807	8.14093	8.05891	7.97099	8.7903	8.73764	8.67113	8.44105	7.6203	8.23599	9.35373	9.48911	9.54307	8.71735	7.89532	9.21126	8.44133
LOC101928278	4.69404	4.6168	4.13214	4.71838	4.38723	4.35527	4.5944	4.35059	4.61364	4.39747	4.45135	4.30571	4.35928	4.15755	4.41044	4.52534	4.74097	4.30331	4.42763	4.29971	4.43054	4.4093	4.32639	4.21668	4.57235	4.45286	4.43668	4.32378	4.40448	4.31538	4.42708	4.41793	4.53081	4.06334	4.68972	4.39335	4.33203	4.59559	4.29841	4.35487	4.58275	4.22443	4.20201	4.04059	3.87549	4.26992	4.13196	4.11601	4.27122
CADM3-AS1	6.07663	6.03068	6.27211	5.83887	5.83413	5.79463	6.1248	5.76779	5.98193	5.86625	6.29817	6.01586	5.99162	5.97671	6.08933	5.86626	6.49809	5.9785	5.83851	5.63279	5.93517	6.40648	6.04236	5.76149	5.98228	5.77356	6.13323	5.86091	6.13539	6.3186	6.3621	5.86892	6.29958	7.16107	6.33308	6.8966	6.21734	6.08046	5.91822	6.58934	6.34959	6.32667	5.59281	5.40146	4.75523	5.40624	5.24924	4.99115	4.9955
MAG	5.38612	5.41821	5.36869	5.51466	5.33131	5.21471	5.50743	5.32135	5.50761	5.4181	5.51551	5.74655	5.61805	5.47818	5.21632	5.22424	5.37144	5.23577	5.25553	5.31485	5.35457	5.76172	5.27072	5.42622	5.57033	5.53825	5.52956	5.61205	5.53348	5.54588	5.61488	5.79013	5.49525	5.92525	5.48223	5.40294	5.20447	5.48514	5.29057	5.32252	5.40943	5.71688	5.52038	5.43466	5.0938	5.48196	5.50223	5.22564	5.18736
LINC01482	5.19685	5.1338	5.37837	5.14367	5.14922	5.05379	5.1092	5.29941	5.3483	5.05702	5.2549	5.09796	5.26924	5.06227	5.31083	5.10303	5.17212	5.39636	4.9547	5.27884	5.43786	5.42087	5.09558	5.2742	5.43307	5.03414	4.95161	4.9633	5.05325	5.27646	5.61556	5.23152	5.48663	5.59727	5.69983	5.21842	5.28124	5.36236	5.46679	5.62919	5.48048	5.59174	4.33414	4.85294	4.13099	4.1142	4.62868	4.35643	4.68439
HLA-DMA	10.8664	9.14339	10.018	8.8579	8.57569	9.59172	9.01191	7.15242	7.38107	8.7779	6.11194	9.71341	9.29521	8.91427	9.51165	6.78062	8.41017	8.20811	9.50807	8.14032	9.59353	9.18338	8.81672	8.07987	9.35863	9.15266	7.00302	9.56621	10.7256	9.5558	9.34553	10.4239	9.21159	8.54127	7.2058	8.25707	7.61416	9.65926	8.35648	8.58909	7.05197	8.38637	10.4673	10.7658	10.3163	9.3796	7.40867	8.34937	9.00787
SHISA6	4.00272	4.37275	4.17452	4.15027	4.33353	4.46865	4.10827	4.23272	4.21667	4.34508	4.26608	4.21783	4.1289	4.37068	4.20964	4.18341	4.46994	4.0956	4.18424	4.35352	4.056	4.29843	4.06286	4.18431	4.20935	4.3345	4.36397	4.25025	4.35856	4.38133	4.43721	4.11545	4.14285	4.23295	4.42747	4.19024	4.07759	4.35482	4.44748	3.9581	3.95572	4.24037	4.01041	3.54435	4.13652	4.09708	3.97321	4.03617	4.39582
FOLH1	5.89353	6.10553	6.15057	5.92169	6.56515	5.916	5.96543	6.17766	6.64446	5.79899	6.26477	6.27361	6.00717	5.80785	6.11477	5.90332	6.09076	6.03616	6.03233	5.85736	6.09877	6.00477	6.04256	6.16993	6.12752	5.99301	6.01784	5.74885	6.04484	5.93214	6.0462	5.64299	5.93822	6.50122	6.29392	6.49825	6.27983	6.07127	6.1227	6.12943	6.1622	6.34087	5.74209	5.57953	5.44352	5.62246	5.51129	5.38305	5.60088
PMS2P1	9.20212	9.62096	9.45486	9.16878	9.3294	9.30916	9.77572	9.57774	9.4026	9.6501	8.93757	9.26504	9.78964	9.37913	9.40632	9.36307	9.16193	9.14374	9.59503	9.26537	9.41191	8.76201	8.9441	10.0581	9.68881	10.072	9.12606	8.83131	9.9954	9.87833	8.81247	9.77267	9.59449	9.5649	9.32117	9.47872	9.094	9.11079	8.89734	10.3768	8.87209	9.30395	10.0145	9.54276	9.89211	10.1503	9.33031	9.93407	9.8881
PTENP1	3.77433	4.18897	3.85539	3.94821	3.73276	3.54163	3.51964	3.69323	4.06492	3.62698	3.5539	3.62967	4.11564	3.74084	3.63346	3.83637	3.69508	3.69168	3.85242	3.67147	3.94521	4.16528	3.73111	4.22394	3.63564	3.84354	3.55118	3.72084	3.69232	3.52064	3.71475	3.71272	3.59206	3.81678	3.8093	4.16635	4.00838	3.97531	3.71677	3.90704	4.54316	4.02236	3.30053	3.39651	3.26595	3.23497	3.3982	3.20144	3.47994
CALCA	6.6774	6.31693	6.45856	6.83408	6.25703	6.30534	6.35455	6.26403	6.59752	6.41801	6.55301	6.52007	6.48601	6.68188	6.77203	6.32499	6.27072	6.66112	6.18926	6.44689	6.2887	6.23729	6.17406	5.99182	6.407	6.49566	6.49772	6.30581	6.50967	6.56297	6.18512	6.75608	6.39216	6.1787	6.39029	6.22927	6.30583	6.20321	6.30406	6.46534	5.99463	6.11752	6.38344	6.01762	5.79127	6.1628	6.20527	6.18877	6.36589
ABCA6	4.09548	3.82094	4.20097	4.04199	4.01522	4.19539	4.00126	4.05616	4.38145	3.77381	3.96504	4.17332	4.10172	4.03459	3.98995	3.89204	4.4961	4.46389	4.10344	3.9131	4.33027	4.44706	4.21608	4.14787	4.24608	3.98594	3.87624	3.98594	3.78541	4.12234	4.14259	3.94726	4.33133	4.90741	4.30825	5.18131	4.17002	4.83331	3.89997	4.11163	4.69397	4.67922	3.78795	3.73546	3.43839	3.88879	3.3676	3.61445	3.63548
GRIK5	8.36119	8.18266	8.36229	8.3386	8.03419	8.23695	8.33639	8.05017	8.0815	8.26268	8.40667	8.26778	8.31112	8.4695	8.3308	8.31829	8.25612	8.20973	8.33639	8.33814	8.29149	8.37268	8.41935	8.38348	8.34677	8.17071	8.37418	8.44217	8.17095	8.30028	8.24096	8.41523	8.36911	8.51644	8.2988	8.33345	8.32587	8.26742	8.21444	8.24684	8.15447	8.1139	8.4713	8.52813	8.07878	8.31632	8.70459	8.44465	8.275
CRX	4.99134	4.8893	4.89949	5.03905	4.89004	4.68569	4.98287	5.09929	5.32688	4.86043	4.8557	5.13741	5.01123	5.1221	4.67487	4.87654	4.997	5.09296	4.86561	4.88707	4.83316	4.90199	4.62626	4.93348	5.0193	4.88707	4.86493	4.82845	4.83331	4.97453	5.1726	5.24532	5.16037	5.14251	5.16354	4.8618	5.10964	4.97886	5.02425	5.09342	4.97544	5.02917	4.85684	4.85066	4.49551	5.00089	4.91772	4.98749	4.93086
KNG1	4.67716	4.79019	5.14866	4.65948	5.22311	4.84932	4.62454	5.13242	5.3378	4.51571	5.32622	5.11585	4.77271	4.59867	5.46026	4.63641	5.70408	5.52812	4.68614	4.77688	5.60829	4.91698	4.55546	5.39028	4.64314	4.45145	4.83959	4.55369	4.58329	5.2027	4.97633	4.33206	4.95092	5.87206	4.89336	5.80422	5.00761	5.18959	4.7503	5.25492	5.90908	4.69714	4.12451	4.39705	4.1638	3.61352	4.339	3.92931	4.52204
MILR1	3.83994	4.16803	4.21379	3.95356	4.18696	4.05282	4.01005	4.03799	3.8894	3.70337	3.72747	3.88293	4.37095	3.84226	4.09216	3.3351	4.01687	3.92659	3.73175	3.88855	4.19102	3.79981	3.9416	3.65793	3.5559	4.12226	3.65039	4.05569	3.76231	4.04761	4.01348	4.07144	3.78678	3.84628	3.53682	3.92867	4.28111	4.03538	3.66808	4.08245	4.22507	3.69361	3.85537	3.65039	4.13474	4.32758	3.73031	4.15364	4.17549
CACNA1S	4.49888	4.45427	4.64903	4.39224	4.61462	4.47713	4.45595	4.67747	4.58642	4.46617	4.52011	4.66927	4.42219	4.22477	4.50541	4.34783	4.61003	4.6604	4.32596	4.54435	4.54893	4.57516	4.52551	4.34335	4.66405	4.47302	4.46617	4.50959	4.45415	4.64493	4.77043	4.37475	4.65336	4.49753	4.70215	4.45902	4.53457	4.46617	4.39914	4.5975	4.47124	4.71132	4.7864	4.41548	4.49402	4.17019	4.25197	4.46617	4.54698
HAL	5.92343	6.04809	6.23639	5.61255	6.90089	6.28583	6.41961	6.41021	6.57733	5.7487	6.59587	6.37695	6.1352	5.90502	6.43199	5.91093	6.39513	6.61852	6.12447	6.57119	6.30517	6.458	6.22054	6.15391	6.47747	5.87213	6.17724	6.43315	6.08298	6.36612	6.54888	5.77692	6.28115	6.18422	6.10138	5.96895	6.22354	6.18622	6.34005	6.31837	6.51543	6.54285	5.23407	5.77907	4.64782	5.4379	5.0072	5.28603	5.4534
KCNV2	3.41026	3.61532	3.81078	3.53955	3.52122	3.71461	3.41625	3.34636	3.6342	3.46653	3.4979	3.57303	3.63757	3.51271	3.41707	3.37237	3.63143	3.6455	3.6003	3.75604	3.68648	3.57139	3.82766	3.53111	3.71337	3.63382	3.64199	3.34742	3.48767	3.63707	3.77177	3.5212	3.63353	3.99009	3.71197	3.60571	3.65797	3.45555	3.55276	3.49762	3.71903	3.67677	3.53338	3.27159	3.41694	3.33449	3.01227	3.29472	3.24071
OLFML1	5.54041	5.60251	5.94219	5.67458	5.84355	6.52396	7.06251	6.02803	5.75833	6.5102	6.53065	5.86946	5.7155	6.00793	7.29507	6.17068	6.03093	6.14215	5.90017	5.98076	6.8435	6.65658	6.46177	6.2011	6.7257	5.99308	6.25329	6.12602	5.66392	5.83398	6.00997	7.60343	6.31036	6.04476	6.43041	6.64531	6.3861	7.80256	5.84455	6.39888	6.48124	6.82859	6.52396	7.08066	6.86205	7.98797	6.25784	8.33137	7.60868
NFATC2IP	8.47713	7.54364	7.04428	8.70624	7.72278	7.35486	8.63609	6.71165	8.70232	8.55715	8.28024	8.34291	7.85501	7.36701	7.47432	7.66077	7.53187	7.77042	8.4743	7.44432	7.27918	7.64647	6.91306	8.06636	7.10857	7.9493	7.20621	7.12028	9.17083	6.32768	8.1568	7.52901	7.41177	5.93911	7.44922	7.13799	7.84206	7.72864	7.77565	9.16673	6.93334	8.00185	8.9586	8.06037	7.86473	8.31078	8.54022	8.69835	9.13284
SLC34A1	5.51216	5.77838	6.20855	5.43415	5.29113	5.7533	5.21053	5.65975	5.52419	5.44599	5.46047	5.38892	5.71023	5.24183	5.92754	5.37552	5.97738	5.9425	5.63899	5.77605	6.04178	5.74394	5.64031	5.72355	5.45577	5.38467	5.72157	5.37803	5.29766	5.69202	5.5987	5.63428	5.7101	6.51315	6.05342	6.28566	5.51714	5.46924	5.76105	5.65049	5.79246	5.61516	5.42148	5.37628	4.96718	5.42576	4.87819	5.31088	5.17698
MIR3916	4.24384	4.39219	4.57561	4.2005	4.50075	4.85497	4.48798	4.46088	4.30712	4.33195	4.39017	4.46066	4.25617	4.73839	4.75197	4.27594	4.22842	4.91942	4.46309	4.65238	4.35634	4.21454	4.46932	4.23351	4.24384	4.07829	4.18043	4.35736	4.54361	4.52773	4.59156	4.58679	4.67351	5.08539	4.37441	4.49699	4.68283	4.54617	4.43282	5.04008	4.68846	4.79011	3.84203	3.549	4.10316	4.0218	4.38529	4.06996	4.06157
MT1M	5.65496	7.54849	9.17665	6.00135	5.18279	6.63486	8.9229	4.95116	5.94473	6.27745	5.40983	4.57657	4.95863	5.55661	7.84286	5.17578	6.88029	8.07455	5.25776	5.29441	5.23518	4.7911	8.52418	4.39743	4.44705	8.582	5.20865	5.99044	5.01647	5.19	8.28562	8.82557	4.51986	5.14536	7.78184	7.91365	5.17285	5.21792	6.01312	6.35931	5.54775	5.39918	5.44325	9.70855	3.98293	4.9918	8.27305	8.78498	5.99135
ZNF675	3.18109	3.25917	2.86039	3.31901	3.45691	3.22381	3.32738	3.59801	3.44564	3.78233	3.88493	3.42169	3.3027	3.87064	3.3786	3.21638	3.12514	3.12525	3.84739	3.93433	3.08336	3.32372	3.30266	3.31698	3.42808	3.4421	3.25029	3.05826	3.41083	3.99098	3.57815	3.34253	3.74526	3.14437	3.39819	3.32404	3.68925	3.24181	3.26742	3.35685	3.25671	3.20311	3.23306	3.36289	3.83073	3.45165	5.15925	3.87946	3.88368
OR7E14P	6.97038	7.07188	6.46222	6.67141	6.64989	6.47529	6.47563	6.00407	7.63369	6.57727	6.22005	6.22007	5.76203	7.14584	7.13241	6.02027	6.41006	6.67456	6.05553	7.6595	6.49339	6.2428	6.10587	5.77671	6.64202	8.07252	5.8696	6.48436	7.10641	7.46234	6.54588	6.22673	6.99764	5.87779	6.61742	6.42351	7.05307	5.69658	6.58322	6.7262	6.57613	6.25489	5.07351	6.87592	6.94552	6.31992	8.90812	8.74392	6.8746
STEAP1B	5.45009	5.40081	5.55884	5.83526	5.38559	5.41472	5.3965	6.04412	5.46129	6.15184	5.79407	5.38936	5.14082	5.66063	5.64517	5.43672	5.62732	5.60963	5.3332	5.76406	5.54361	5.7339	5.4811	5.82589	5.52495	5.33813	5.76811	5.1368	5.45243	5.3643	5.26626	5.37489	5.93952	5.91164	5.95309	5.4458	5.45389	5.70896	5.71031	5.56906	5.97136	5.6023	5.19417	6.56166	7.23485	5.18059	5.48523	5.08301	5.61221
RPL10L	7.68359	6.93032	7.97458	7.63954	6.28727	7.45556	6.88306	6.65244	7.15863	6.90575	7.40151	6.5728	7.58705	7.33629	7.26505	7.06267	7.22539	6.42142	6.16695	7.53391	6.0738	7.42352	7.43579	7.32735	6.67897	7.19948	6.71038	7.34057	7.62698	7.28733	7.13416	7.17339	7.00857	7.96528	6.89179	6.94873	6.3293	6.78002	6.50018	6.35693	5.86289	5.74278	8.70303	7.04398	7.71461	7.43507	6.48643	7.73326	7.55824
BRINP3	2.81488	2.79609	2.77911	2.81678	2.76449	2.83389	2.7848	2.75983	2.88032	2.80095	2.78891	2.82163	2.64704	2.81434	2.77367	2.81434	2.86795	2.80186	2.80672	2.78127	2.8276	2.80985	2.79131	2.72041	2.86641	2.92756	3.0635	2.81664	2.58122	2.9112	2.91067	3.00763	2.81879	2.84722	3.09813	2.85083	2.78054	2.59794	2.8471	2.85204	2.85645	2.89938	2.9577	2.92892	2.66731	2.88893	2.78955	2.69773	2.65181
EDDM3A	4.94461	5.07177	5.89403	4.96188	5.4161	5.50665	5.12532	5.11808	5.28809	5.12974	5.15483	5.73868	5.36081	5.20001	5.73335	5.11653	6.14022	6.41125	5.28238	5.71997	5.98619	5.80895	6.44209	5.41659	5.65086	5.16193	5.28988	5.48778	4.7148	5.63711	5.30153	5.2502	5.87741	6.09969	5.9048	6.57598	5.79324	6.1491	5.63673	5.74566	6.6965	6.66346	4.57556	4.34463	4.28927	4.20157	4.19407	4.40817	4.00563
RAB40A	3.32932	3.31073	3.41442	3.57668	3.6529	3.52863	3.31117	3.81446	3.51078	3.41555	3.32381	3.38132	3.39413	3.30608	3.50494	3.37326	3.40153	3.71535	3.3344	3.2915	3.28845	3.25247	3.27124	3.48225	3.24354	3.2776	3.29474	3.16315	3.43215	3.33406	3.22054	3.32489	3.315	3.74175	3.36403	3.3926	3.24787	3.26937	3.44283	3.40456	3.31875	3.46382	3.31709	2.99746	3.05597	3.38489	3.04472	3.29057	3.29781
SPDYE2	5.33487	5.61181	5.51873	5.17128	5.38075	5.48278	6.64367	5.48348	5.61065	5.60176	5.24944	5.8321	5.84983	5.60015	5.37349	6.26253	5.18054	5.4602	6.71057	5.77504	5.83454	5.55772	5.77207	6.45231	5.83598	5.24393	5.28187	4.97328	5.64338	5.41865	5.43756	6.01426	5.38769	5.53227	5.59085	5.85458	5.35002	5.5253	6.08105	7.12298	5.58942	5.60176	5.16851	5.13865	5.58119	5.35378	5.40664	5.48806	5.02664
HUS1	7.8791	8.62606	8.2074	7.48464	8.94779	8.12731	8.76905	8.09676	8.09556	7.90487	8.32068	8.32667	8.56976	7.78804	8.72434	7.93701	8.66141	7.91749	8.05205	8.60052	8.05085	7.80652	8.41325	8.47414	9.01992	9.70397	8.42798	8.77639	7.68199	8.56145	8.4998	7.42832	8.12453	8.53832	8.31381	8.48259	8.76232	7.7397	8.97963	8.6562	7.63595	7.43151	8.17105	9.22765	8.99554	9.43439	9.23499	9.71797	7.69119
LINC00963	5.72103	6.00435	5.07087	4.61717	6.32401	5.33187	5.98301	5.48301	4.88522	5.44331	5.25392	5.53193	6.55696	6.17886	5.5504	4.92437	5.10177	5.86201	5.34761	5.70515	5.70061	5.64999	5.22648	5.43819	5.04763	7.27042	4.8555	5.1503	7.04198	5.33951	5.8952	5.88854	5.60683	5.13443	5.32586	5.74773	5.85838	5.31913	5.56691	5.57794	4.86844	5.40094	6.03365	6.95786	6.82298	5.32649	5.71153	6.48505	6.49358
ZNF573	5.24439	6.65152	4.27056	6.91988	4.87978	5.95055	5.77839	5.1055	5.32451	6.40399	6.99725	5.77202	6.2171	4.96253	5.38741	6.60542	5.08079	5.03786	5.95517	6.5427	6.22123	5.60233	5.03203	5.99504	5.40135	5.18309	5.76296	5.3405	7.49547	5.59196	5.63455	7.05956	5.5024	6.24937	6.05426	4.69191	4.81469	5.98759	6.87716	6.88776	5.60399	4.69564	5.84759	7.81619	7.26308	6.33243	5.95944	5.53416	6.4341
SKA1	3.26401	3.72483	3.5759	3.05608	3.26983	3.36734	3.38622	3.53463	3.37529	3.33577	3.36703	3.33814	3.17215	3.27274	3.06696	3.64623	3.36739	3.35581	3.36889	3.6786	3.40748	3.77336	3.3369	3.19221	3.73382	3.54215	3.46734	3.71987	3.16911	3.50087	3.23296	3.17535	3.30003	3.64365	3.44817	3.29002	3.31567	3.62848	3.36681	3.18997	3.58064	3.57331	3.37896	3.47034	3.79859	4.04466	3.583	3.72279	3.72033
ST3GAL2	6.87375	6.7793	6.86779	6.68541	7.12878	6.76532	6.83255	6.89538	6.86826	7.13254	7.00149	6.96053	6.89271	6.87658	6.8598	6.8848	6.7094	6.90921	6.99122	7.07461	7.03455	7.48171	6.88861	7.23571	7.16939	7.27972	6.93359	7.1001	6.89793	7.07029	7.3779	7.34791	7.31381	6.92493	7.29029	7.03455	7.04578	7.20091	7.51337	7.11868	7.21821	7.01535	6.76205	7.15948	6.82008	7.00463	7.0988	7.59195	6.93907
ZNF813	6.3435	5.6661	6.35621	5.98006	7.1294	6.52572	6.74935	6.64759	6.68178	6.87043	6.59814	6.16702	6.13462	6.43657	6.85007	7.43058	6.84799	6.22608	6.40033	6.82099	6.03799	6.37018	6.4183	5.85836	6.29617	5.94876	6.34903	6.88577	6.51382	6.30177	5.77736	5.94791	6.11026	6.78418	6.30295	5.89427	6.53137	6.47977	6.59688	6.30425	5.8171	6.7293	7.7332	7.07108	7.54099	7.64443	6.42506	6.53668	7.55878
SEC14L1P1	5.39106	5.40596	6.32706	5.53009	5.53095	5.33675	5.15637	5.33013	5.60123	5.11449	5.31211	5.29746	5.28921	5.09313	5.36625	5.25399	5.37606	6.3006	5.62258	5.77693	6.01711	5.4945	5.69126	5.94468	5.60999	5.35758	5.45321	5.16925	5.28312	5.72066	6.33662	5.7092	5.5418	5.95139	5.94365	5.98936	5.88184	5.43128	6.08389	6.10464	6.34556	5.99031	5.41036	5.32177	5.4576	5.8501	5.85103	4.9379	5.3298
MAGOH2P	7.34742	6.92662	7.13248	7.05913	7.12424	7.49219	7.20828	7.23017	7.2456	7.25195	7.64283	7.09754	6.89541	7.91618	7.10639	7.93856	7.47532	6.46714	8.01232	7.32856	6.63131	6.59734	7.2319	6.89384	7.57108	7.00893	8.0396	7.27371	7.07493	7.18449	7.05638	7.04208	7.11959	6.25496	7.27085	6.14241	7.23214	6.79889	7.84887	7.02234	6.60507	6.37061	7.53987	7.32484	7.4515	6.61394	6.67604	7.37487	7.71923
FUT7	5.19973	5.09049	5.21371	5.05705	5.35784	5.15807	5.28268	5.21656	5.16362	5.156	5.22511	5.44846	5.37276	5.35784	5.13014	5.13563	5.19451	5.51555	5.15582	5.08901	5.35784	5.29352	5.34117	5.47968	4.95219	5.196	5.00295	4.90586	5.23605	5.23853	5.18726	5.6659	5.59412	5.66839	5.46222	5.44408	5.23649	5.12273	5.59453	5.19317	5.11022	5.10185	5.81733	5.55585	5.29743	6.15002	5.47364	5.57204	5.56839
SUZ12P1	3.77692	3.51098	3.16598	3.9406	3.56272	3.51129	3.69715	3.65205	3.5142	4.05052	3.64473	3.53828	3.75379	3.39508	3.4634	3.74851	3.45654	3.48971	3.84292	3.65205	3.3814	3.61985	3.54202	3.53495	3.73684	3.50997	3.5858	3.64726	4.30124	3.34898	3.72142	4.02858	3.49017	3.34891	3.48481	3.33771	3.64357	3.47751	3.48753	3.65512	3.80773	3.53025	3.52261	3.60078	3.48839	3.56442	3.72693	3.92059	3.43245
SMARCA2	9.96759	10.6956	8.88632	9.85733	9.64089	9.29548	10.9886	7.4077	7.45824	8.06836	9.67017	9.44378	10.5884	9.94319	10.3809	8.66717	7.71928	7.94599	9.5273	9.16946	8.54314	8.05667	8.67626	8.93131	9.85472	11.3342	7.05928	8.50434	11.5096	8.95707	9.53218	10.8425	7.64196	9.31466	7.57345	9.16137	10.1997	9.63859	9.27827	9.80305	7.81625	8.74927	9.68865	9.31553	10.3501	9.78257	8.89313	8.8755	9.41091
TEK	9.22585	8.81381	9.17994	9.01008	9.09524	8.97121	8.60606	9.05442	9.21003	8.55161	8.94077	9.10959	8.67464	8.65229	9.01964	8.52437	9.10404	9.39449	8.6837	8.81334	9.10045	8.80773	8.95802	9.07465	8.91849	8.65567	8.8044	8.53891	8.37661	8.75058	8.76896	8.96954	9.01916	9.25717	9.10847	9.38149	8.87221	9.03374	9.34165	9.02116	9.36045	8.9988	8.14921	7.91265	7.28182	7.1752	7.90384	7.6323	7.95602
SEC61A1	9.61396	10.0975	9.4281	10.2889	9.1633	9.39019	9.94569	9.52831	10.0379	9.62055	9.40143	9.59886	9.47431	9.22227	9.63686	10.2756	9.31504	9.02913	10.5448	9.71074	9.14357	8.93102	9.28751	8.87383	9.87138	9.55394	9.59135	9.8954	9.6918	9.281	9.11699	9.41861	9.34487	9.64732	8.98607	8.20122	9.40295	9.1416	8.74519	9.30074	8.70879	8.9175	10.7476	10.7517	10.9139	10.7449	10.8447	11.3415	11.497
YWHAB	12.1067	11.8616	10.5333	12.6885	12.3149	11.9982	12.2746	11.9292	11.5314	12.4099	12.0675	12.3574	11.3728	12.0984	11.9268	12.374	11.1772	11.0159	12.3131	11.6383	11.1019	11.4485	11.7355	10.8967	11.2661	12.4885	12.2578	12.162	12.8398	11.1803	11.6069	12.643	11.1936	10.2224	10.9696	9.80455	11.4407	10.8504	11.1607	10.9571	10.479	10.3955	12.7602	12.5811	13.0066	12.9544	13.0157	12.9394	13.0284
EIF3L	12.0355	12.5351	12.3461	13.379	11.8734	11.7203	11.873	12.1805	10.8961	13.4369	11.9703	11.8539	12.7011	12.987	11.2563	12.8302	11.3916	12.4643	11.1186	12.5832	11.1581	11.5572	11.6874	12.2907	12.231	12.247	12.9334	13.387	13.3841	11.8703	11.6241	13.1228	12.058	11.567	11.7536	10.9685	10.8707	11.3573	11.6338	11.644	10.9282	10.5536	13.4024	12.5619	13.5202	13.0156	12.8949	12.4341	13.1917
CHCHD2	10.8714	10.8272	10.0489	11.621	10.6365	10.6142	10.5188	10.9452	10.3233	11.0141	10.8986	10.2264	10.7026	10.8613	10.274	10.8189	10.4516	9.7975	10.3932	10.386	9.75141	9.77575	9.86001	9.84902	10.4823	10.6486	11.0751	11.0712	11.1133	9.84561	10.2411	10.1447	10.9018	10.1821	10.2416	9.89727	10.0366	9.21058	9.48248	9.08009	9.46617	9.03362	11.7499	11.2583	11.8653	11.6409	12.4777	11.5405	11.3087
NGRN	11.0917	9.35907	8.96611	9.81973	9.78033	10.4797	10.0309	9.07811	9.84671	10.213	9.40112	9.52351	9.93894	11.6689	10.3963	10.0766	9.68946	8.32856	11.0274	8.66682	8.77492	8.78223	9.09576	9.23302	9.07676	10.7075	10.0503	10.7187	10.3048	9.71904	9.57988	10.168	9.50182	8.40438	8.66624	8.72247	9.54365	8.7915	9.94877	8.4096	9.00077	8.41871	10.7392	10.7848	10.6698	11.4154	12.5544	11.6789	10.7558
SERBP1	12.4232	11.2999	10.883	12.4306	11.207	11.7632	12.2025	11.5494	11.3003	12.5815	11.9388	11.8219	11.3084	12.817	11.7557	12.5986	11.5278	10.6911	12.8105	11.3043	10.4683	11.1284	10.7562	10.5934	11.1107	12.0758	12.3407	11.9317	12.2383	11.1619	11.5698	12.5331	11.6759	11.0505	11.2716	9.68	11.2304	10.4807	11.2748	9.87019	10.3023	10.1415	13.0961	11.6079	12.9259	12.9319	12.6716	12.8369	12.7916
COPZ1	10.4521	9.70429	9.0547	10.86	9.61233	10.0018	9.38112	9.50668	9.18518	10.2713	10.7046	9.66378	10.6173	9.96175	9.76824	10.9356	9.58229	8.96549	10.3147	9.71082	9.11749	8.95208	9.4174	9.83126	9.50362	10.0685	10.2295	9.14206	9.23908	9.39108	9.59245	9.85	10.2367	9.29353	9.57968	9.19568	9.32957	9.40543	10.1003	8.01943	9.12892	9.25884	11.787	11.6959	10.7513	11.5053	9.87733	11.0572	11.4286
VPS35	11.6073	10.9393	10.6486	10.7191	11.0922	11.0512	11.267	10.6638	11.09	11.6314	11.4932	11.3098	10.1996	11.6689	10.2973	11.0801	10.5404	10.3217	11.0129	10.4816	9.67501	10.6791	10.4348	10.2317	10.4949	10.4769	10.1208	11.7291	11.7588	10.393	10.3712	11.3673	11.1105	9.62431	10.3902	9.43546	10.3395	10.3328	10.3893	10.3366	10.2176	10.1096	11.7755	11.5086	12.0192	10.9275	13.1612	12.1546	12.6746
S100A6	9.8208	10.53	9.78697	10.8855	11.0299	9.17141	10.8706	8.7601	8.93101	8.94029	9.34091	9.04083	10.5891	10.8759	9.20531	8.05509	8.38299	10.7079	8.4434	9.16195	9.58433	8.86611	9.01824	8.71329	8.7477	10.3763	7.74019	11.0065	10.9383	10.9103	8.25437	11.6448	8.78069	7.91169	8.21147	8.86429	9.93376	8.86087	7.18034	9.79094	7.28382	8.25162	10.523	10.3943	9.52939	11.8757	9.80732	8.48433	11.663
AES	6.90736	6.35898	6.43664	6.07676	7.14985	6.33096	6.31666	6.52589	6.46221	6.05136	5.76326	6.53913	6.83941	6.2231	6.11917	6.17097	6.32542	6.21627	6.80485	6.45343	6.52016	6.57416	5.73347	6.29479	6.74911	5.83181	6.14003	6.64419	6.76769	6.15104	6.32515	6.94967	6.72181	6.17051	5.91946	7.05991	6.58317	6.50293	6.60649	6.77772	6.10578	6.33417	8.30534	8.54362	7.30243	7.90886	8.09271	7.58814	8.64651
ITM2B	12.5257	12.1993	11.4542	12.7767	12.1208	11.735	12.6664	11.6046	11.6231	11.9091	12.1332	12.2108	12.6563	12.5537	12.4759	12.7436	10.9639	11.708	12.7675	11.8804	11.0343	11.9176	11.5876	11.8847	11.5722	12.23	11.5139	12.0407	12.9774	11.4122	11.8941	13.4926	11.79	10.6099	11.797	10.8245	11.9084	11.5652	11.1011	11.4161	10.8385	10.798	13.1525	12.1765	12.8824	12.5881	12.6568	13.0319	12.6465
TMSB10	13.505	12.7778	12.7589	13.8146	13.356	12.9429	13.4301	12.6629	12.6831	13.0261	12.4157	13.0166	12.577	13.8181	12.7193	13.6438	12.1455	13.0499	12.706	12.8348	11.7659	12.6723	12.6118	12.5465	13.1387	13.5316	13.6086	13.4984	13.0266	13.3162	12.8761	14.1018	12.5098	11.1187	12.3817	11.7509	12.8854	12.4103	11.9726	12.4256	11.6934	11.8292	13.3823	13.4065	13.6541	13.6025	13.8514	13.6444	13.6123
WDR6	9.6038	8.25097	7.73264	8.5764	8.4634	8.68953	8.75622	8.67933	7.38235	9.7958	9.48549	8.99349	8.65167	8.94969	8.65165	10.4996	8.74876	8.22766	8.7722	8.26724	8.47844	8.16489	8.82314	10.0478	9.14525	8.57921	9.13771	8.60404	8.87199	7.88765	8.27748	9.62303	8.99906	8.67778	9.12203	8.05201	9.54507	8.84767	8.62405	9.89394	8.15487	8.75445	9.73434	9.92752	8.98921	9.16727	10.4121	8.46716	9.28542
EIF2AK1	10.4313	9.71285	9.78851	9.70868	8.49981	9.22156	9.80368	9.26567	8.785	10.3896	10.2634	10.4099	10.2308	10.2467	10.1654	9.80594	9.69457	9.39169	10.1853	10.6166	9.30242	9.15086	9.58364	9.61119	9.7309	9.91912	9.90825	9.66113	8.98424	9.02514	8.52183	9.55309	9.5871	10.4622	9.46696	7.69559	9.57007	9.00688	9.57164	9.52381	9.09691	9.65237	11.0125	11.0876	10.7699	9.6381	11.4741	11.1886	11.1183
NAMPT	9.64314	10.4878	9.93351	8.387	8.79469	9.28325	10.3803	8.90968	9.21857	9.48258	8.49648	9.12327	8.53773	9.55264	9.85927	9.2504	8.82644	8.33535	9.1776	8.95564	8.75582	8.16367	8.91555	8.48676	9.06496	10.765	8.66324	8.19007	9.58324	9.36112	8.52846	10.6636	8.73129	9.1651	9.16636	8.86849	9.39802	8.21493	7.83733	9.38639	7.32838	7.92513	9.84857	9.39311	10.0504	10.1955	9.92	10.4572	9.90077
TMEM30A	9.27619	9.54093	9.37178	10.2614	10.7698	9.15622	8.25923	8.85993	8.68592	11.2364	10.2962	10.0965	8.57637	10.3599	10.3415	9.6495	9.41486	7.90285	11.4072	8.87439	8.47896	7.58009	8.86378	6.74487	9.37832	9.52888	7.86247	10.2612	8.74144	8.85883	7.76037	9.2618	9.14051	9.48456	9.27915	7.29494	7.47611	8.62697	7.93693	8.29685	8.28486	8.29601	9.32629	8.95052	10.2198	10.0331	11.467	10.7018	9.53588
NAA50	11.5542	11.3772	10.4647	11.4992	11.6573	11.1989	11.622	11.1739	10.9273	11.9063	10.9585	11.0452	11.0873	10.9635	10.8113	11.7876	10.914	10.084	11.541	10.4588	10.3346	10.1447	10.2321	10.0352	10.4616	11.1434	11.1427	11.7836	11.8027	10.733	10.7867	11.5081	10.536	10.128	9.58186	9.02355	10.5889	9.9367	9.30266	9.52326	9.28901	9.48471	11.7614	11.4073	12.276	11.8246	11.6219	11.7637	11.9682
PDCD6IP	9.58078	9.1954	8.63225	10.6733	9.54474	9.319	9.65663	9.40661	9.81217	9.59081	9.57959	8.96087	9.25653	9.37717	8.83977	9.35081	8.51002	8.58566	8.86602	9.12533	8.68022	8.47929	8.91961	9.01844	9.06518	10.0958	9.17147	9.78717	9.67967	9.58813	8.18123	9.18835	9.07509	8.82806	9.01363	7.95741	8.93302	8.88527	8.62879	9.15398	7.98052	8.04976	10.3257	9.27605	10.4301	10.628	10.4744	9.7184	11.4204
ADIPOR1	8.94627	8.33979	8.14732	8.50543	8.10805	8.07628	8.86235	8.16608	8.4571	8.17788	8.2434	8.48481	9.20576	9.14785	7.93964	8.57785	7.90686	7.92378	9.1023	8.2186	8.7743	8.03632	7.63277	8.07022	8.11322	8.67132	8.40935	8.32922	8.51556	8.13562	7.25036	8.86821	8.30109	8.16236	7.7085	8.0008	8.14552	8.18824	8.67095	8.63807	7.89453	7.75723	9.35687	9.0711	9.49001	9.2348	9.30382	9.00845	9.99889
COPG1	7.23077	7.34145	6.58671	6.90947	6.91464	6.92983	7.03168	7.23287	7.86739	6.73865	6.50056	6.8434	6.87525	6.66848	6.82527	7.38557	6.8471	6.72426	7.46305	7.29457	6.948	6.40707	6.46541	6.90566	7.29019	6.98886	6.6508	7.27376	7.06096	6.859	5.97228	7.2562	7.16678	6.94156	6.71849	6.13229	6.94829	6.62199	6.59232	7.24512	6.39148	6.87226	7.60298	7.93328	7.36299	6.81124	7.51713	7.74811	7.9264
UBE2Z	10.9012	9.532	9.41841	9.98123	10.3761	9.98648	9.56377	10.0842	9.83966	10.1316	9.47408	9.95681	9.63585	10.2974	9.96686	10.2885	9.93195	9.82293	10.1816	9.40051	9.74242	9.54122	9.34893	9.56261	9.70225	9.80089	9.75723	10.3412	9.6579	9.45584	9.70636	9.88365	10.8092	9.87549	10.0158	9.69371	9.87452	9.58092	9.78296	9.51694	9.84029	9.57898	9.65511	10.1533	10.0982	9.35477	9.9078	9.52367	9.65935
GSTK1	9.13009	9.0099	9.22033	10.118	8.42136	8.72865	10.1276	8.61363	10.0339	8.27552	8.43321	9.39996	9.55659	9.4716	8.97653	8.87316	8.58023	7.81925	8.87534	8.83314	9.11612	8.5739	8.15207	9.53832	9.16735	9.87206	8.48142	8.54081	9.33934	9.32939	7.66447	10.8652	8.96667	8.98132	8.23375	7.98187	9.04277	8.61481	8.34719	8.75504	7.42061	7.86141	10.1372	9.56661	9.71637	10.8391	8.99208	10.1847	10.879
CNDP2	12.0719	10.4304	9.14367	10.9862	10.0779	10.5765	10.7879	11.5743	9.89753	9.12476	9.90719	10.9621	10.7638	10.3136	10.2715	10.5446	10.582	10.2626	11.1018	10.6382	10.2066	9.84592	9.42882	9.13899	10.8278	10.1804	9.94812	9.80664	11.3866	10.7545	10.3264	11.6231	10.6744	9.62472	9.74663	9.60219	10.7078	9.67696	10.8103	9.7895	8.72272	9.75101	10.8319	10.9712	11.6436	12.7552	10.3501	11.0566	10.5787
DDX56	7.85972	7.61932	7.70453	7.82466	7.67763	7.73929	7.20235	7.70899	7.48721	7.53422	7.58771	7.70896	7.76664	7.42978	7.60652	7.26141	7.6866	7.34415	7.35987	7.99245	7.71355	7.79529	7.54417	7.9631	7.34198	8.12246	7.74361	7.68759	7.26164	7.8418	7.59017	7.58483	7.64204	7.56453	7.72559	6.96779	7.46322	7.09785	7.37826	7.9957	6.78936	7.04098	8.47768	8.16186	9.08298	8.27931	8.82019	8.44144	8.06112
A2M	10.1073	9.7608	9.30076	11.394	9.31183	9.88208	9.55571	9.25653	9.3295	8.26956	7.98199	8.26944	8.24698	8.25588	10.422	7.78677	8.33093	9.64734	7.4881	8.42253	9.5251	12.0339	9.08796	8.03689	10.4537	9.50357	7.39296	8.8905	11.5061	8.51447	10.2601	10.6682	8.85178	9.39932	10.1227	9.14957	10.3773	10.5428	10.9989	9.18762	9.1544	8.92002	8.81745	8.79345	11.3488	10.3672	10.0903	9.6363	12.2967
TM9SF3	11.2399	10.2116	9.7575	11.2649	9.89988	10.636	10.9006	10.0529	10.3546	11.5464	9.97488	10.58	10.2941	10.9528	10.6725	10.7401	10.325	10.2664	10.9891	9.77182	9.6609	9.52449	9.98705	9.94378	10.5603	11.1712	10.6871	11.1612	11.2046	10.4079	9.5215	10.997	9.79508	9.56646	9.53635	8.89936	10.0377	9.72825	9.72105	9.82756	9.55545	9.6421	11.2612	10.9363	11.0264	11.1505	11.5061	11.1415	10.4856
TRIM44	9.01856	8.09286	8.23534	10.166	7.78777	8.45059	7.58672	8.58854	8.20834	9.2044	8.61825	7.64819	7.63414	7.90137	7.74291	8.48786	7.8054	7.37701	9.05169	8.16532	7.96576	8.03816	8.79746	7.4811	7.32865	8.90123	8.16858	8.52761	9.19045	8.0256	8.95256	8.42319	8.27154	7.4432	7.8733	7.03602	8.24101	7.44863	8.21627	7.36541	7.07541	7.315	9.5788	8.43565	9.29546	10.5803	9.84148	9.98638	11.0401
ADI1	10.5323	10.5895	9.36492	11.6669	11.0843	10.0046	11.2146	10.5588	9.99054	10.9696	10.7611	11.0231	10.9389	10.8935	10.3326	11.7743	10.6746	9.61988	11.0779	10.3779	8.60701	9.2359	9.27375	9.5743	10.7049	10.8811	10.6896	11.4672	10.3653	10.5212	9.63991	12.0475	10.5718	10.159	10.0508	9.82708	9.79315	9.6497	9.88874	9.23405	9.45089	9.44893	11.2033	11.1749	11.9422	11.6327	11.9196	12.5457	12.5975
RAB31	7.81419	8.26701	7.87598	8.01196	8.07302	8.91855	10.3249	7.96883	7.1454	8.59621	7.41808	8.29312	6.83805	7.56564	9.8613	7.52271	7.98018	8.25743	6.47409	7.99	8.50076	8.17709	8.15786	6.47013	9.35405	8.37844	7.69501	8.14881	7.72965	7.608	9.3707	9.56171	7.47903	7.44152	7.48619	8.65471	9.12672	10.4251	8.06322	7.71931	8.9529	8.74815	8.61531	9.66505	9.36885	10.467	8.8253	9.46396	9.24581
NRBP1	7.60475	7.10465	7.08358	7.50311	7.11573	7.13508	7.46998	7.31844	7.41038	7.00566	7.34756	6.93081	6.67145	7.11138	6.85448	7.97498	7.19453	6.60884	7.51614	7.00718	7.115	6.5627	6.96969	6.5974	7.38231	7.44921	7.1617	7.36329	6.95611	7.341	6.76995	6.97025	6.81917	6.9178	6.71607	6.35256	7.28989	7.17875	6.44525	6.85625	6.41602	7.05245	7.6656	8.0746	7.60588	7.9455	8.30744	8.26932	7.40635
C3	12.8824	12.6238	12.2513	9.6201	10.8632	11.8219	12.0971	10.1499	11.5486	11.3639	12.0228	10.57	12.204	8.84456	8.5863	9.21965	10.0233	10.4589	11.9498	12.7676	12.0321	11.0599	12.3932	9.86643	12.3847	13.029	8.25687	11.898	13.2972	10.8173	10.8494	11.4159	11.592	10.8792	10.9332	9.78008	11.782	11.9805	7.9468	11.3924	9.83147	10.8019	13.6341	13.4009	13.3965	12.2505	8.55446	13.3135	13.2245
RTRAF	11.0369	10.333	10.6278	11.953	10.8401	10.7611	11.0561	11.2993	10.7331	11.1493	10.8542	9.7785	10.635	11.0975	10.2396	10.8148	10.3818	9.73916	10.6031	10.2889	9.40281	10.1854	10.445	10.6801	10.0618	10.2611	11.4615	11.2079	10.6475	10.3352	10.669	11.3671	10.2536	9.56617	10.0061	8.50855	10.6516	10.0869	9.75916	9.78554	9.60321	9.61346	12.2126	11.4294	12.3336	12.187	11.8951	12.5247	12.3942
POMP	11.4749	11.0091	10.5521	11.5911	11.1628	10.969	10.8678	10.6059	11.0115	10.6171	9.85249	10.3019	10.5956	10.7935	10.3651	10.8898	9.97422	10.1153	10.6014	10.6689	9.92009	10.5332	10.1798	10.4005	10.0448	11.288	10.7006	11.6841	10.635	10.4366	10.0397	11.7707	10.1457	9.44537	9.86725	9.73966	10.8845	10.1905	9.15806	10.0479	9.93106	9.71823	11.4147	11.2296	11.9891	11.9355	11.8139	11.5929	12.0559
PIGT	8.36822	8.81377	8.91773	9.39675	8.86313	8.59272	8.05778	9.46712	7.84492	9.52304	9.43657	8.85535	8.39204	8.44222	8.92265	9.10536	8.73164	8.11653	8.70064	8.5713	8.44163	8.49978	8.8397	8.26766	8.83055	8.47825	9.62066	8.81689	8.17389	7.95376	8.00508	8.58569	8.11869	7.80497	8.05372	7.60135	8.46905	8.25514	8.82015	8.31959	7.91426	8.55735	9.1747	10.4736	10.2494	9.73286	10.7193	9.34371	9.68842
GOLM1	8.16321	8.95596	7.89818	7.13957	7.93616	8.00961	8.30141	7.42099	6.66184	8.29348	9.04086	7.03683	8.05762	8.5696	8.59098	8.77798	7.46493	7.55885	8.12505	7.95892	7.56094	7.80623	7.91934	7.45332	7.43115	9.07226	7.82921	7.71803	8.13997	6.52868	7.85669	7.86181	7.14547	7.83602	7.28432	7.11005	8.17691	8.37727	8.08348	7.85681	7.79819	7.75101	7.27166	9.35053	8.91792	9.68092	10.5703	8.45278	9.52192
MTCH2	9.54755	9.83663	9.62103	10.357	9.0623	9.45957	8.44802	9.84769	9.43298	10.2605	9.37058	8.50836	8.42643	9.77762	8.61063	9.27114	8.9688	8.61115	9.83208	9.44169	8.34708	9.22432	9.45971	8.56942	9.03138	9.431	9.45513	10.2836	9.94358	9.23457	8.79796	8.4576	9.56024	8.77728	8.9059	8.10213	9.02374	8.92829	8.76926	8.35009	8.32886	8.17346	10.9544	10.4951	10.8653	10.894	11.2089	10.9991	11.4413
NDUFA4	11.1319	11.3813	10.7885	11.7462	10.3603	10.2555	11.2497	10.8256	9.33849	11.137	11.7502	11.3183	11.4362	11.3475	10.9482	11.4988	10.1039	10.0146	11.1261	11.0693	10.4133	10.4056	10.3456	10.6888	10.4277	10.4927	11.2031	11.2068	11.2068	10.5848	10.5929	11.7831	10.7751	10.713	10.5791	9.8101	11.0957	10.1789	9.75925	10.3387	10.1602	9.80946	12.6051	11.7788	12.6113	11.3011	12.1861	12.0886	12.3126
TRMT112	11.9338	11.0328	9.98476	12.089	11.0621	10.7128	11.1581	11.2732	10.7115	12.2466	11.4867	10.9183	11.023	11.0999	11.0284	11.5153	10.6443	10.2842	11.3779	10.898	10.1315	10.7761	10.9366	10.9306	10.2226	11.3004	12.2398	11.3727	11.6482	10.8442	10.1029	11.7073	10.8362	9.37386	10.4341	10.0074	11.0244	10.659	10.3339	9.87025	10.2466	9.96286	13.0387	11.696	12.2488	12.4514	13.7703	12.1571	12.9132
RDH11	11.2432	10.2093	9.49367	10.1048	10.2404	10.2093	10.9826	11.3184	8.60157	11.3003	10.1806	9.4287	9.31371	10.8113	10.1204	10.2014	10.1927	9.64072	10.9212	9.6206	8.93816	9.60905	9.96815	9.96598	10.2864	9.5777	10.5506	10.5891	10.0886	8.56167	10.3159	9.18386	9.56031	9.07418	9.77314	8.76	10.8914	9.52815	9.84727	9.14568	9.4405	9.69672	11.0659	10.1593	10.9708	10.7185	11.4059	10.3697	10.1074
SLC39A1	7.76762	7.56575	7.59214	8.15592	7.30141	7.88317	7.1904	7.59768	7.38387	8.11237	7.3753	7.82742	7.58519	7.52699	7.81721	7.74864	7.47466	7.4532	7.75153	7.35037	7.14776	6.99385	7.11468	6.95287	7.01673	8.01221	8.00991	7.61598	7.60447	7.62046	6.72758	8.05432	7.58263	7.05734	7.16537	7.0423	7.36421	6.88383	7.12896	6.39157	7.03876	6.57028	8.20643	8.13738	7.94676	8.1982	8.34474	7.8382	8.53797
PNRC2	10.7113	10.7887	10.1644	11.6905	10.6168	10.4019	11.4239	10.8729	10.521	12.0896	10.8894	10.6397	10.7475	11.2921	11.2068	11.1928	10.3856	10.4328	10.5391	10.4678	9.99616	10.072	10.1986	10.6418	10.6889	11.7613	11.4294	11.0802	11.1386	11.2644	10.5258	11.3769	10.7758	9.97167	10.5821	9.56624	10.8951	10.4507	9.83138	9.81837	9.51343	9.82567	12.9302	10.8998	11.8978	11.8492	11.695	12.3165	11.8091
WDR83OS	8.49201	9.08426	9.30774	10.6886	9.53679	8.65069	8.75805	10.2447	9.18693	9.18712	9.54004	8.40703	8.67771	9.5308	8.30634	9.23813	8.82667	8.1218	8.80943	9.40004	8.65522	8.76029	8.778	8.34982	9.66171	8.07398	9.95885	9.74101	9.04349	9.20241	8.68745	9.54101	9.05403	8.62804	7.75848	8.1403	8.95945	8.61621	9.02325	8.53423	8.22293	8.10863	9.90299	9.6415	9.54306	9.8295	9.9778	10.9307	10.6609
ZNF106	8.58968	7.66851	7.0753	7.65917	7.80551	8.12089	8.41581	6.30218	7.23809	8.0302	7.61725	7.40502	7.96636	8.15071	7.97251	7.98017	7.81404	6.87317	8.29111	7.18665	7.93153	6.58222	7.30383	7.80852	7.54649	7.13535	7.39499	7.4564	7.36629	7.3536	7.58834	7.84694	7.41607	7.60469	7.3132	6.69461	6.98546	7.45569	7.32006	6.90866	7.29057	6.79972	8.78369	7.22509	8.46055	9.21581	8.40851	8.71454	7.73458
GPS1	6.13033	6.73821	6.37539	7.73846	6.29166	6.72855	6.85733	6.49549	6.01277	5.95421	6.33376	6.15129	5.88067	7.36024	5.85429	6.6856	6.30357	5.92962	6.31946	6.10227	6.76313	5.86043	5.81408	6.39394	6.41464	6.77011	7.42958	6.69341	6.02762	6.28699	6.03252	5.80941	6.49906	5.84359	6.30094	6.20441	6.13423	6.02512	6.37321	6.26107	5.42491	6.0641	6.90666	7.8365	7.86651	7.93555	7.85771	7.6278	8.33737
YPEL5	10.7401	9.545	9.01882	10.6897	10.0602	9.69925	11.1932	9.42572	9.94855	9.37479	10.3336	10.117	10.3495	10.4607	9.83546	10.7112	9.29769	9.00393	10.0854	8.7844	9.2169	8.89443	8.59136	9.51405	9.25388	10.185	9.35888	10.5678	10.2539	9.80863	9.59286	10.8191	9.50881	9.49292	8.20735	8.92394	10.2261	9.33949	8.99916	9.01564	9.47964	9.04762	10.5459	10.6045	10.5669	10.9084	10.1614	10.6529	9.77383
YKT6	7.78655	7.76171	7.57944	8.0834	7.82303	7.57468	7.80912	7.90446	7.82514	8.56849	8.03235	8.04755	7.50745	7.88962	7.94822	7.59898	7.76153	7.20674	7.56947	8.02817	7.34691	7.81922	7.51199	7.39132	7.27048	7.99336	7.99976	7.64599	7.10428	7.43371	7.13762	7.61673	7.75299	8.1729	7.67361	7.1665	7.7581	7.12144	7.49023	7.88338	7.31576	7.54357	8.74737	8.83688	8.26912	7.98996	8.92537	8.80694	7.64084
PRMT5	8.39908	8.68676	8.75262	8.76076	8.55625	9.12069	8.41577	9.65575	8.33707	8.0996	8.87187	8.36868	8.31975	8.28596	7.94186	8.57635	8.74219	7.35317	9.37899	7.62319	7.87926	7.79287	8.02105	7.98777	8.47231	7.41467	8.62076	9.32603	8.49714	7.56071	8.17429	7.17959	8.50869	7.6775	7.96817	7.15774	8.01913	7.75015	7.69206	6.92751	7.85818	7.29124	9.93162	8.46401	10.7656	8.26209	10.0461	9.88005	9.88831
GALNT2	9.85464	9.34273	8.78596	9.69781	9.09145	9.44368	9.11356	8.89525	9.85067	9.96488	9.77482	9.78293	9.77499	9.3699	9.58609	10.6684	8.88911	9.24586	10.102	10.0958	8.46657	9.46222	9.25294	8.65279	8.84941	9.86556	10.426	9.38758	11.0021	8.96164	8.88292	10.6973	8.85144	8.39664	8.36483	7.6277	9.2149	9.25091	9.11633	9.49037	9.17235	9.55324	11.0554	10.8669	10.8414	10.3917	11.9379	10.7992	10.3015
RAB11B	7.05069	7.16667	7.24699	7.30665	7.47255	7.1639	7.22319	7.49983	7.46261	7.2535	7.23121	7.3808	7.27837	7.39797	7.1862	7.14655	7.18236	7.59453	7.02033	7.04286	7.00442	7.37309	7.13863	7.27364	7.22807	6.87546	7.09667	6.697	6.88904	7.19114	7.27967	7.55692	7.33666	7.63939	7.4324	7.64535	7.46124	7.12546	7.2922	7.73152	7.39663	7.16901	7.49131	7.67342	7.4317	6.85226	7.33133	7.2876	7.6432
PRR13	8.53254	7.68109	8.09751	8.7086	8.03009	8.66309	7.91059	7.82594	8.17722	8.73069	8.0814	8.14707	8.23165	8.60372	8.43762	8.48145	7.63047	7.18745	8.76511	7.95886	7.63933	7.58351	7.88239	7.57445	8.64932	8.49279	8.10044	8.32442	8.38162	8.17422	8.11299	8.28931	8.6349	7.89806	7.81356	7.11117	7.70384	7.59763	8.04844	7.65429	6.78724	7.18914	9.70526	9.78955	9.74256	8.98504	9.73467	9.80754	9.97816
TMEM43	9.69327	8.12217	8.68278	9.24602	9.07807	8.31699	9.17803	8.20458	9.35275	9.54314	9.08641	9.40907	9.97138	8.76866	9.03419	9.13164	8.75109	8.71807	8.5628	9.11483	8.79612	8.60135	8.91071	8.97378	9.02622	9.41533	8.73349	8.83074	9.70375	8.98851	8.67622	9.39275	8.72644	8.66933	8.61503	8.02502	8.61965	9.22692	8.28649	9.01185	8.0717	8.26837	10.916	9.39614	9.16951	9.78951	11.4358	9.33635	9.86212
NPLOC4	8.79719	8.61537	8.19225	9.1512	8.58574	8.97442	9.32926	8.33598	8.2916	8.82251	8.39117	8.97831	8.72384	9.566	8.77443	9.04292	8.7692	8.52281	8.2739	8.89799	9.13534	8.57042	8.32563	7.92613	8.5494	9.20328	8.79644	9.37324	8.92753	8.67318	9.02508	8.40034	8.82083	8.94231	8.38487	8.64889	8.62906	8.20238	8.88383	8.42861	8.25164	8.80515	9.19951	10.2018	9.32079	9.52355	9.45402	9.8741	9.45867
UFC1	10.5899	10.1823	9.85027	11.8672	10.6558	10.3026	9.71597	10.1626	9.81099	10.7805	10.4646	10.7046	11.5105	11.3732	10.3628	11.2084	10.2237	9.55119	10.7422	10.3893	9.03862	9.73688	9.43107	10.2241	9.77884	10.8104	11.1312	10.7822	11.1487	10.0372	9.64004	10.829	10.8517	10.1751	9.94663	9.19441	9.78043	9.8911	9.79527	9.16925	9.4674	9.11073	11.796	10.9032	12.1307	11.7123	10.861	11.1393	12.077
ATP5F1E	11.531	11.2017	10.9452	12.0144	11.2994	11.2231	11.1902	11.6084	11.3341	12.0559	11.3483	11.2975	11.1848	11.4961	10.9911	11.4807	10.9385	11.2113	10.7877	11.526	10.4613	11.3974	10.8987	11.0306	10.8703	11.6755	12.1069	11.9827	12.2619	11.0263	10.7508	12.2362	10.9187	10.1605	10.84	10.0474	11.1791	10.8857	10.5135	10.3778	9.96974	9.70399	12.3935	12.1283	12.8104	12.3897	12.3206	12.5267	12.7929
GOLPH3	10.8346	9.99697	9.17713	10.7569	10.7074	10.1144	10.7432	9.50854	9.98353	11.2621	9.95993	10.0885	9.97195	11.5988	10.4732	10.445	9.65531	9.26029	11.3165	9.94013	9.84448	8.74002	9.7536	9.67559	10.2958	11.0634	9.16101	11.1209	10.8722	10.3577	9.44206	11.1908	9.69849	8.83858	8.95624	8.16278	9.6051	9.36377	9.03622	10.0368	9.05662	8.88579	10.6723	10.973	11.1545	10.8598	11.555	10.797	12.0378
POLDIP2	9.4221	9.29654	9.4229	9.98705	8.95948	9.34477	9.11833	9.39718	9.36446	9.65579	9.19948	9.4032	8.95341	9.37756	9.17511	9.81677	9.05	8.9794	9.59509	9.44873	9.00364	9.21673	9.36624	9.11932	9.5688	9.07896	9.75832	9.40166	9.14859	9.23025	8.97706	9.00958	9.53351	9.65523	9.21628	9.06071	8.80463	8.98638	9.28906	9.24537	9.23107	9.48045	9.64566	10.5344	9.96921	9.33548	10.0587	9.95222	9.50161
BZW2	11.3001	10.2176	10.7805	11.6301	10.2405	10.1097	10.174	10.6037	9.16956	12.1172	10.5093	11.536	11.0383	10.5537	10.4365	11.1834	9.78318	10.1138	10.6641	11.155	9.58097	10.1858	10.1609	10.1516	9.91836	9.62254	11.5385	10.5471	10.4411	9.67969	10.133	10.7264	10.971	11.1434	10.9154	9.19968	10.707	9.57291	9.79472	10.541	9.62655	9.58034	12.1022	11.1717	12.2555	10.1446	11.874	12.5652	12.2905
YTHDF2	10.4914	10.7617	10.1863	11.3803	10.6632	10.5697	10.8618	10.3311	10.6252	11.3294	10.7071	10.3735	10.4755	10.9362	10.3803	11.1343	9.81327	10.2481	10.352	10.1068	9.51721	10.1271	10.036	9.95156	10.1487	11.3046	10.9417	11.6296	11.5606	10.5326	10.0376	11.2222	10.7067	9.18175	10.433	9.28626	10.3598	9.97029	9.61838	9.90229	9.72353	9.57582	11.9277	11.1331	11.886	11.8239	11.5582	12.0345	11.8781
SUPT16H	9.53305	8.7634	9.2576	9.46583	8.75653	9.24176	9.24315	9.68681	8.99657	9.85982	9.65153	9.11207	8.76819	9.05911	9.37295	9.8014	9.45305	8.63333	9.97071	8.57725	8.67723	8.4417	8.64645	8.75017	8.83577	9.07678	9.53509	9.35786	8.75598	8.04484	8.55184	8.67794	9.01799	8.24466	8.74626	8.47798	9.07917	8.91694	8.51949	8.24672	9.10301	8.61793	9.94196	8.78393	9.70102	8.41428	10.1477	10.151	8.7738
PCNP	10.2362	9.66884	9.08146	10.9257	9.89782	10.2369	10.7248	9.74452	9.92037	10.8035	10.4089	10.2312	10.4427	10.2194	10.3977	11.1592	9.60201	9.24764	11.1685	9.50321	9.06942	8.79076	9.53515	9.64009	9.59634	9.14997	10.5109	10.4415	10.7124	9.98393	9.87667	11.011	9.9369	8.98446	9.99625	8.81668	9.51364	9.57981	9.06367	8.96538	9.18697	8.96634	11.191	10.7059	11.421	10.4146	11.4499	11.4098	11.0624
ARPC4	8.80906	8.47246	8.11286	8.37378	8.85954	8.47675	8.66962	8.57297	8.4884	8.22565	8.62772	8.74456	9.1049	8.66918	8.86826	8.74456	8.31174	8.41447	8.26521	8.78094	8.48716	8.54873	8.81674	8.79579	8.65767	9.08347	8.70202	8.46025	8.72521	8.89095	8.58564	8.61357	8.45781	8.2738	8.49991	8.84586	8.64423	8.52766	8.962	8.62439	8.14448	8.28986	10.2756	9.21745	9.25834	8.88469	9.26694	8.85641	9.6338
GOLGA7	9.41441	8.65551	8.00885	8.87976	9.00177	9.42202	9.42309	9.53873	8.96669	9.88299	9.9915	9.21161	9.0501	10.2276	8.87711	10.2537	8.66235	9.09786	10.3105	8.62401	8.41677	8.75032	9.19706	8.52068	8.62963	8.6236	8.69399	11.4521	9.30849	8.79911	9.06494	9.58645	7.6037	7.96847	7.29656	8.63521	8.88115	9.23003	8.31051	8.21494	8.70277	8.57767	10.509	11.6855	10.1573	11.066	11.7027	11.1383	10.6862
WBP11	10.5279	9.77334	9.85191	10.3578	8.76613	9.7317	9.92895	9.26539	10.3125	10.3311	9.90158	9.56997	9.62386	10.3211	10.0318	10.9379	9.76444	10.1195	10.7513	9.70767	9.17062	9.51629	9.43114	9.42807	10.0031	10.9871	10.7048	10.405	9.9247	10.1453	8.72954	8.70418	9.25339	9.02336	10.1253	8.6175	8.73264	8.78136	9.46942	8.79921	8.8364	8.9496	11.095	10.9755	11.2979	10.2612	11.8928	11.0167	10.6947
UBE2J1	9.79922	9.63978	8.94198	9.16057	9.0062	9.67291	9.27001	8.70361	9.05402	9.45956	8.87229	9.3897	8.91123	8.96514	10.3317	9.05289	9.05021	8.60025	9.88149	8.40617	8.72747	8.55837	8.61167	7.19263	8.62577	9.60418	7.8105	9.85998	8.08894	8.93441	9.28971	9.59437	8.36549	8.3843	7.23625	8.13257	8.46022	8.84085	8.3496	8.42261	8.78992	8.57302	9.84809	9.08347	10.4025	10.6493	10.6175	9.49286	9.70262
SPG21	10.9142	9.62448	9.36963	9.82131	9.726	10.7282	10.021	9.45238	10.4412	10.2957	9.91167	9.81944	10.0433	11.6195	10.0635	10.4752	9.76821	8.79941	10.6276	9.975	8.92679	10.0508	9.78341	9.78129	9.39363	9.16753	10.2388	10.1067	10.9185	9.8052	9.56757	9.93213	10.0818	9.81361	9.39644	9.27817	9.67344	9.37241	9.65135	9.62895	9.14475	9.47144	11.9926	11.091	10.5624	11.8362	11.5512	11.5275	11.526
SLTM	10.3117	9.30755	8.39564	9.78149	9.31927	9.40716	9.9196	8.90208	9.44483	10.0392	9.25408	9.31654	9.82727	10.1059	9.50945	10.0183	9.02931	8.31818	10.1733	9.02958	8.94085	8.71799	8.47977	9.66719	9.03773	9.2498	9.54531	9.25138	10.8757	9.64806	9.30149	10.1292	9.102	8.56864	8.86191	8.0215	9.26643	8.95983	9.08749	9.28953	8.80717	8.76574	10.719	10.1455	10.3188	10.7531	10.5582	10.105	9.56961
USP39	7.87553	8.14931	7.63546	8.00986	7.97076	8.08778	8.01555	8.34055	7.68789	7.84093	7.36611	8.07371	7.92026	8.28416	7.41523	8.5295	8.50066	7.34148	7.69896	7.44122	7.30534	7.34509	7.72853	7.66838	7.95273	7.71558	8.23112	7.95729	7.48151	7.57437	7.71357	7.39011	7.80731	7.45331	7.35638	6.99949	6.96277	7.15734	7.12908	7.44649	7.42241	7.55488	8.44671	8.66766	8.50593	8.34083	8.90166	9.1179	8.06916
SYNCRIP	10.7062	9.28499	8.73781	10.6619	10.0335	10.1712	9.92905	9.26309	9.67684	10.4787	10.4842	10.3456	9.59812	10.9706	9.9711	11.0568	9.822	9.39887	11.0388	9.33352	9.53723	9.08208	9.63323	8.75479	9.38444	10.1712	9.70632	10.3202	9.92337	10.3777	9.56378	10.8549	9.13573	8.78895	9.76131	8.64637	9.11712	8.59448	8.90495	9.30663	9.45563	9.08923	10.1966	10.1019	9.97195	10.8651	10.6323	10.7506	10.2878
YY1AP1	8.68225	8.65736	8.83425	9.02101	7.77023	8.38417	9.09028	8.60769	8.55508	7.59306	7.97353	7.76575	8.51244	7.28625	7.9934	8.0584	8.06003	7.45986	8.45044	8.4264	7.43954	7.51289	7.52691	8.33558	8.3236	8.30556	8.03281	8.39283	8.45736	7.90591	7.75934	8.0539	7.76656	7.34638	7.50629	7.57514	8.2342	7.57001	7.48389	8.05909	7.76465	7.22457	9.08193	8.99708	9.30828	9.22351	8.38972	8.88715	9.97949
EVL	7.04543	6.07101	6.11825	5.84982	6.02771	6.58438	6.82655	6.2223	5.86752	6.56954	5.91664	5.85273	6.95068	6.43246	6.20753	6.63123	6.64453	6.12924	6.03656	6.19455	6.58072	7.00688	6.40518	6.85589	5.70831	5.06073	7.63124	6.45423	6.48884	5.72867	6.80194	7.49592	5.99756	5.82341	5.34337	6.45307	7.66043	7.36312	6.54165	5.48709	6.91245	7.30107	6.77361	7.95521	7.59376	6.71799	7.22553	7.51786	7.40212
TFG	10.6332	10.8348	10.8367	11.4408	10.638	11.0689	11.0228	10.777	11.1182	10.4725	11.0566	10.6221	10.7475	10.7254	10.6891	11.3092	10.7547	10.2914	11.1906	10.7531	10.6537	10.6943	10.7681	10.516	10.972	9.94327	10.8765	11.0435	10.6035	10.8554	10.5864	10.8355	10.8368	10.9253	10.8917	10.3981	10.6306	10.5607	10.2778	10.7825	10.6906	10.4443	11.0021	11.171	11.8303	10.7546	12.1655	11.3152	11.6381
DDX41	8.19762	8.55299	7.5923	9.63253	7.40528	8.33527	9.09366	9.44968	8.00481	8.86929	8.60306	8.18071	8.37723	8.52113	8.57247	9.06335	9.07169	8.43438	9.49508	8.75177	8.20956	8.33108	7.89925	8.95433	8.56043	8.4417	8.84096	8.87548	8.42407	7.75685	8.45015	8.84976	8.95648	7.77846	7.78961	7.26989	8.49714	8.39469	8.26641	8.27411	8.0835	8.16595	10.1591	10.6848	10.1358	9.87107	8.71806	9.13086	9.87913
MED4	10.0301	9.74808	9.5757	10.2337	9.58488	9.53976	9.31141	8.61289	10.0152	10.8545	9.57013	9.20979	9.45024	10.0665	8.58832	10.3571	9.05852	8.43201	10.0654	9.69325	8.47567	9.61979	9.51332	9.63627	8.6286	9.41049	9.75985	9.76421	10.7365	8.93973	8.79157	10.4766	8.87517	7.66791	8.99849	7.81186	8.87384	9.04913	7.96326	9.55076	8.73215	8.33311	11.2333	9.78497	10.7483	9.79377	10.3805	10.9041	10.6282
CTDSP1	8.34146	7.66171	7.59602	7.95592	7.73769	7.73817	8.14707	7.90928	8.05741	7.83713	7.71999	7.95126	8.38929	8.12113	7.78874	7.93339	7.79984	8.03462	8.10449	8.06151	8.11819	7.43122	7.75003	8.19321	7.85333	8.45424	7.84021	7.83284	8.24803	8.40781	7.86284	8.22852	7.90532	7.67723	7.80523	7.92694	7.72793	8.17635	8.21921	7.75106	7.79742	7.6427	9.00546	8.83234	8.37832	8.56869	8.8099	8.69199	9.02657
HIGD1A	12.2929	12.2897	10.7972	12.4052	11.9049	12.0558	11.9425	11.6912	10.671	12.6455	12.1869	11.7956	12.013	12.4001	11.8045	11.9094	11.1999	11.6917	11.7808	11.515	11.0422	10.903	11.2745	10.6517	11.5345	12.6045	11.4394	12.1269	12.8858	11.3897	10.8961	12.4354	11.3978	10.8611	10.6713	10.636	11.8017	10.6457	10.5887	10.8471	10.545	10.0165	12.8875	11.8617	12.8732	12.8807	12.8448	12.8634	12.9757
PPA1	12.4479	11.8873	11.3274	13.0668	12.3657	12.2942	12.1688	11.2546	11.1553	12.9611	11.5197	12.0609	12.2913	12.3368	12.0722	12.466	11.4228	11.7216	12.2447	10.8803	10.917	10.9074	11.6716	10.555	11.8249	12.4115	12.1877	13.434	12.9115	12.1822	11.7775	11.4601	11.807	10.3966	11.1221	10.1816	11.0429	10.9861	11.0508	10.3167	10.7451	10.0369	13.0511	12.5937	12.9493	13.3022	13.5411	12.9479	13.357
CDC42BPB	6.15771	6.49153	6.50318	7.35079	6.17845	6.22103	6.34233	6.4416	6.45157	6.37784	6.0977	6.1218	5.4011	6.30975	6.19649	5.88151	6.07014	6.74948	6.10009	6.60291	5.8065	6.41056	6.30776	6.61132	6.42935	6.44636	6.26759	5.8005	5.81581	6.59976	6.30221	6.48833	5.98651	5.44573	5.88567	5.70961	6.37318	6.32754	6.38948	6.37761	6.25001	6.29498	5.97813	6.63766	5.88931	6.45289	6.16819	6.81536	6.38437
PRELID3B	9.63007	9.12078	8.59525	9.79869	8.95821	9.72961	9.71665	9.42264	10.2457	11.3927	10.4923	9.91705	9.68131	9.96329	9.40462	10.793	10.0606	8.08357	9.9931	9.46431	8.84993	9.47341	8.46056	8.7378	8.40871	9.43274	9.58054	9.58838	10.617	9.05492	8.60181	9.16988	9.11619	8.43823	8.81903	7.70984	8.2558	8.65725	9.0112	7.86537	8.73433	8.30716	10.4892	10.3165	10.8367	10.2723	10.1572	10.3271	10.7656
ARL8B	11.0449	10.3341	9.49122	11.2792	11.223	10.147	11.5373	10.5145	10.2018	11.202	10.857	10.4883	10.8371	10.8223	10.8215	10.8243	10.0715	9.9409	9.89799	10.2756	9.55613	9.89615	9.87642	10.533	10.3386	11.6304	10.4737	11.0343	11.2954	10.6194	9.56478	11.5513	10.0947	9.95859	9.98923	9.30989	11.214	9.94969	10.3674	10.0724	9.30199	9.37318	11.8706	11.0064	11.2211	12.1878	12.2172	10.5245	12.2515
TNS3	11.5612	10.2175	10.0848	11.6009	9.59829	11.0071	11.2096	9.19807	10.009	11.4142	10.5927	10.9169	10.6661	10.03	10.8739	9.88875	10.0788	9.6759	10.6318	10.8986	9.80352	10.0529	10.1731	10.1226	11.3061	11.5551	8.59035	11.2701	11.2862	10.2815	9.96706	11.6112	10.7277	9.56601	10.3394	9.06793	9.68881	10.2158	9.42373	9.62424	9.26089	9.0212	12.9786	11.5866	12.4056	12.497	11.007	12.4009	11.4677
POLR2E	9.00942	9.1115	8.6069	9.74053	9.18069	9.0422	8.2687	9.59453	8.7255	8.84788	8.75236	8.63867	8.91765	9.10229	8.30173	8.72223	8.71581	8.519	8.5955	8.83655	8.35721	8.91008	8.72787	9.03859	8.99525	9.05162	9.03307	9.17956	9.31869	8.08529	7.86016	8.97385	8.86231	7.85867	7.85027	8.36469	8.40197	8.69428	8.19823	8.07787	8.65329	8.28479	10.7335	9.9771	10.6524	9.76094	10.0463	10.1987	10.7955
NDUFA10	9.37448	9.59613	8.81271	10.2481	8.34039	8.72224	8.87775	9.28921	9.05398	10.8619	9.10225	9.07455	9.60959	9.77249	9.84784	9.72008	9.21736	8.69523	10.5164	8.79491	8.59635	8.37145	8.1565	8.57773	8.37562	8.56411	8.72563	8.15004	8.99769	8.78255	8.12793	8.91533	9.57608	9.65416	8.20343	8.01094	8.08538	8.34168	8.76628	7.90199	8.52277	8.39301	11.1074	9.34874	10.3766	9.64949	7.84937	9.84766	10.0559
PREB	8.51036	8.00697	7.8879	8.42782	7.92001	7.83158	7.28329	8.27878	8.11822	8.11204	8.16137	8.11894	7.678	7.77193	7.64051	8.48947	7.83976	7.36585	8.04737	7.87838	7.47996	7.19645	7.14184	7.48267	7.77948	7.78741	7.99747	8.52064	7.93241	7.92284	7.41685	7.54716	7.99268	7.52766	7.23588	6.9562	7.77104	7.74507	7.49113	7.67409	6.7225	7.4452	8.9455	9.04953	9.15882	8.66276	9.00638	9.64815	8.21078
PIAS1	8.59225	7.94323	7.36761	8.14616	7.71944	8.21586	7.81468	7.59871	8.17591	7.59541	7.58266	7.35642	7.78014	8.45136	7.71996	7.90044	7.53749	7.82416	8.27575	7.65003	7.53848	7.68485	7.83644	8.65459	7.7671	8.75314	8.1893	7.82179	8.34782	8.60163	7.42576	7.73897	7.54099	6.76053	7.72487	7.78157	7.71313	7.73313	7.14545	7.65909	7.14687	7.23358	8.87882	8.00148	8.37378	9.37884	8.24567	8.84078	8.38568
RNF130	7.72022	8.22111	7.94836	9.0973	7.59635	7.99059	8.88992	7.99388	7.17502	7.8598	8.385	7.83344	8.49475	8.19413	7.90036	8.1106	7.78808	8.1961	8.41853	7.74006	8.63707	8.17519	7.94013	8.20088	7.40113	8.55564	8.0618	8.3516	8.37982	7.06567	8.48546	8.59932	7.75602	8.18876	7.4793	7.28204	7.95728	8.31976	7.71668	7.37368	7.19771	7.46626	10.2089	7.9928	9.49502	9.81367	9.33976	8.44644	10.1281
CPSF7	9.56405	9.27744	9.00229	9.38763	9.22709	8.94365	9.69067	9.02555	9.44472	9.61834	9.42078	9.29654	9.00022	9.25265	9.35577	9.39784	9.05001	9.85055	9.50665	9.36489	9.4897	9.42567	9.19508	9.52697	9.28108	9.55105	9.58388	9.52679	10.2331	9.58594	9.90937	10.0696	9.13518	9.28173	9.50499	9.30982	9.77034	9.05254	8.92985	9.98929	8.82649	9.51939	9.4548	9.62686	10.0523	9.98256	10.4464	10.7315	10.2345
METTL9	10.4752	10.6773	10.4434	12.1256	11.1882	10.2172	10.2246	10.6451	10.0399	11.1562	10.5554	9.66443	9.94181	10.9725	10.1818	10.1933	10.3086	10.0449	10.7981	9.56528	9.93683	10.565	9.48156	9.5787	9.53282	11.1727	11.3916	10.7804	10.6199	10.0559	10.4737	10.6867	10.3101	9.43657	9.33872	9.38681	9.48303	9.82373	9.25087	9.53641	9.42033	8.8736	11.6206	10.6837	11.4491	11.4548	12.3359	11.6301	11.9181
HSD17B12	11.661	10.3486	9.71884	11.0368	9.83344	10.5248	10.5348	9.87003	9.85238	11.0601	10.2418	9.94638	10.114	10.459	9.93936	9.89378	9.51037	9.95673	11.5268	9.8508	9.85276	9.49459	10.5253	9.08281	9.01823	11.0297	9.28567	10.621	11.369	10.4287	10.7646	10.436	10.1979	8.91674	9.32503	8.84156	10.3968	9.90114	9.41133	9.05577	9.01692	8.66643	11.8474	10.4787	11.9342	11.6647	11.2985	11.8536	11.9685
CMPK1	10.9198	10.3045	9.16801	9.83928	10.2457	10.181	11.1211	8.35332	9.93162	10.2298	10.3252	10.0025	10.0119	10.8483	9.74317	9.8771	10.0036	8.48436	11.4819	9.94993	9.5618	9.23186	8.98759	9.37091	9.18171	10.3149	8.93605	10.6098	11.3874	9.84351	9.51412	10.3309	8.91041	9.13798	8.99815	8.76457	9.64784	9.39839	9.87974	9.09274	8.32803	8.52492	11.7941	9.99276	10.8708	11.0735	10.8447	10.7762	11.6318
MIF	10.3549	10.8966	10.6679	11.5455	10.5426	9.75428	9.78657	10.4449	10.3681	11.0295	10.4437	9.76242	10.2603	10.9586	10.1993	10.6218	9.54592	10.8534	9.69411	10.5384	8.71839	10.4314	10.088	10.4432	11.0329	11.0513	10.5964	12.1564	10.7168	10.189	9.02611	11.0881	10.4095	8.66511	9.86204	9.42316	11.7707	9.97374	10.4765	10.3971	9.4769	9.34629	11.7538	11.8812	11.4592	10.8881	11.8834	11.2123	12.3796
PIH1D1	8.77009	8.90778	8.71447	9.72056	8.5785	9.03709	9.39408	8.89708	8.29398	9.12655	8.99301	8.89956	8.97954	9.12745	8.50036	9.38822	9.01747	8.28891	9.02741	8.70648	8.51659	8.43207	8.4078	8.22792	8.33254	7.66347	9.35515	9.19648	8.76033	8.65269	8.12125	8.28959	8.84688	8.5051	8.24715	9.00572	8.43454	8.78212	8.74933	9.09835	8.0165	8.12189	9.82993	9.93195	9.6132	9.24148	9.87371	9.23373	10.3768
CAB39	10.0196	8.99491	8.41579	10.0483	9.31565	8.92371	9.69454	9.30543	9.06399	11.3086	9.37055	9.10133	9.58811	9.55958	9.63209	9.48703	8.9036	8.53799	9.46241	8.49168	8.78998	7.86868	7.97715	7.89513	8.46882	9.45653	8.27056	9.66559	9.66426	8.60903	8.45663	10.1682	10.2673	8.67348	8.69248	8.22087	8.7656	8.68699	8.63327	7.65622	8.68924	8.29523	11.3804	9.49176	10.2267	10.7716	11.1849	10.6139	10.4809
SUCLG1	10.7317	10.8076	9.60959	11.6425	10.6643	10.307	11.1032	10.7	10.0957	10.7935	9.12883	10.1858	10.3456	9.68946	10.3719	10.9533	10.1745	9.46146	10.0041	10.1162	9.8567	9.31394	9.45077	10.3095	10.4616	10.8673	10.0575	10.6268	12.0488	10.5013	9.91512	10.7481	10.3417	9.78268	9.64823	9.27506	9.61217	9.81593	9.03081	9.66755	9.623	9.53025	11.9116	10.8429	12.1554	11.8567	11.5891	11.9036	11.3966
GPBP1L1	7.1608	6.92988	6.4059	6.89832	6.69668	7.08198	7.41926	7.13794	7.04246	7.83372	7.05214	7.03062	7.04013	7.84671	7.37049	7.25008	6.94229	6.7439	8.0452	6.9155	6.76914	6.59691	6.57718	6.49736	7.99204	7.48507	6.90086	7.44674	7.43804	7.17041	7.35738	7.47061	7.16082	6.30188	7.08781	7.0656	7.19956	6.66629	7.82402	7.20689	6.03804	6.53558	7.69565	7.69596	7.84985	7.69263	7.45301	7.75457	7.68265
CDC27	8.7143	9.15049	7.50286	9.18278	8.21272	8.75701	8.77948	8.80518	8.36613	8.85895	8.57519	8.89133	8.45789	9.84504	9.52848	9.37161	9.04567	7.94516	8.7552	8.29458	8.69887	7.89469	7.79498	6.834	8.37509	9.05777	7.88035	8.99667	8.4804	8.43659	8.59592	9.64727	7.88625	7.82423	8.15181	7.77935	8.56574	8.33302	8.82767	7.42274	8.30816	8.49182	9.05452	8.95353	8.76418	9.05936	9.68709	9.00717	8.2643
EMC3	8.69577	8.66984	7.93788	8.12926	9.509	8.28397	8.85726	9.06923	8.40755	7.71373	8.40353	7.82732	8.68776	8.77047	8.54043	7.95632	8.46934	8.43863	8.1569	8.23414	8.68276	7.95507	8.30553	8.59296	9.1253	9.28359	8.49251	8.92877	8.82649	8.50823	8.01322	8.24177	8.21663	7.8168	7.65815	7.56703	8.72725	7.9004	8.46223	8.11198	6.77945	7.54623	9.10129	9.15049	9.32726	10.0302	9.78571	8.86589	10.3907
MMADHC	11.4457	11.6949	10.3381	12.1199	11.7517	11.3028	11.843	11.3473	10.3245	12.3107	11.1136	11.1266	11.5615	11.7477	10.8654	11.745	10.6501	10.276	12.2791	10.677	9.94942	9.84656	10.2888	9.94552	11.1977	12.3633	10.9789	12.2915	11.7868	10.2799	10.9502	11.9191	11.042	10.6708	10.6553	9.01744	9.70374	10.035	10.2959	9.70511	9.98531	9.79171	12.6073	11.7432	13.0189	12.6195	12.4471	12.6591	12.5276
NAT10	9.75946	8.45794	8.67192	10.4344	7.91696	9.48941	8.62278	9.18538	9.4825	10.011	9.21033	8.72325	8.99585	8.74597	8.37814	9.27632	8.73497	8.58282	9.56278	9.32803	8.99256	8.98734	8.5219	9.04719	9.0127	9.14679	9.1567	9.19978	9.55144	8.86516	9.26064	8.41784	9.25364	8.24584	8.84078	8.48655	9.24349	9.04694	9.26081	8.7165	8.24066	8.70526	10.2085	9.65381	9.8364	9.90024	9.65326	10.365	10.8906
IPO9	8.35451	8.44212	7.5257	8.76104	8.66975	7.98648	8.36226	8.38435	8.60953	7.87897	8.21836	8.35502	7.97316	8.24693	7.44053	9.16645	7.94682	7.76272	8.81141	8.9089	8.57589	7.59428	8.0479	8.58309	7.90453	8.78824	9.17198	8.42684	8.45528	8.08168	7.66	8.24071	8.23464	7.36129	8.14025	7.39116	8.3928	8.35996	8.48465	8.67625	8.75872	7.85735	8.67298	8.95671	9.15686	9.11096	9.84907	9.54681	9.59926
EPS15	8.95839	8.39655	8.07253	8.57199	8.47695	8.81225	9.10015	8.2885	8.73259	9.36945	8.92027	8.90033	8.46469	9.42306	8.9774	8.56883	8.24186	8.58283	9.1944	8.0746	8.46735	7.62198	7.69108	8.0867	8.40876	9.22101	7.95135	8.62154	9.61259	8.09523	8.54005	9.97888	8.48966	8.05524	8.06365	7.96247	8.69828	8.50686	8.99082	8.23771	7.97924	7.83593	9.93661	8.58042	9.18012	9.92852	8.87372	8.99739	9.51254
ARFGAP1	8.08181	7.46561	7.2236	7.59019	7.41865	7.51636	8.07839	7.81947	8.34181	8.23304	8.20419	8.23689	7.71349	7.51766	8.02557	8.08853	8.07771	7.89518	8.11037	8.43383	7.66272	8.16838	7.6142	8.081	8.00082	7.72165	8.01455	7.9234	9.03551	7.24193	7.78296	8.12745	7.76216	7.12276	7.90675	7.36403	8.13715	8.11282	8.08119	8.83409	7.71037	8.29195	8.57325	8.6749	8.21202	8.167	9.27113	8.67565	8.51439
PARVA	8.64854	7.80833	7.81902	7.96481	7.23547	8.30663	8.10785	7.45232	7.18624	8.23701	8.00858	7.32296	7.77377	7.4543	8.42564	8.27343	7.87249	7.89337	8.576	7.77136	7.2591	7.0243	7.85569	7.40737	7.48016	8.22611	7.67486	7.48874	7.14345	7.67107	8.11499	8.36122	7.6439	7.88963	7.72902	7.06674	8.24356	8.24188	7.38981	7.44586	8.07719	7.79857	9.1384	8.24356	8.1077	8.87145	8.7839	9.89224	8.14789
LIMA1	8.19951	7.60972	7.94787	7.8414	8.6743	8.14049	8.91067	7.35832	7.63177	8.1889	7.7115	8.32455	8.18683	7.86799	8.62089	8.24264	7.99175	8.10026	8.05031	7.77851	8.24716	7.87589	7.92882	7.91237	8.86525	8.32909	7.98525	7.48464	7.38251	8.0996	8.22906	8.44958	7.46598	8.37576	7.73005	7.46328	8.29053	8.67899	7.69124	7.71096	8.10857	8.23884	8.56806	8.33872	8.28182	9.26714	9.37793	8.16351	8.13987
KCTD3	8.36529	8.14314	7.48127	7.48863	6.93574	7.76863	8.26401	7.52921	7.34464	8.74832	8.27971	7.82926	7.88374	7.99646	6.30669	8.79634	6.7985	5.68368	8.65249	8.15723	5.19191	7.2394	5.95109	7.53776	6.42424	8.05805	7.25252	6.24471	8.14002	7.59109	7.12245	8.54859	7.2645	6.12861	7.03519	5.67508	6.32556	6.67761	7.37835	5.56923	7.00379	6.58698	7.92433	8.21113	8.48636	9.58507	8.16105	8.00754	9.04379
PTCD3	8.49005	8.51324	7.70172	9.27434	8.27954	8.61554	8.66815	8.19105	7.69039	8.71256	7.85697	8.03153	8.44984	9.03697	7.89823	9.28014	8.13229	7.64144	7.84643	7.63899	7.92143	7.56748	7.91163	8.52799	8.26057	8.67581	8.94251	8.77443	8.55843	8.50554	8.03279	8.37507	8.37222	7.69053	8.46707	7.19156	7.15953	7.77701	7.46526	7.88263	7.68175	7.7911	9.01652	8.44581	9.92058	9.5959	10.169	10.1292	8.31223
FXYD6	6.84348	7.18615	7.49305	7.30657	6.79139	6.63552	7.29875	7.21746	6.41984	7.56598	7.98947	7.58597	6.68013	7.37276	7.22238	9.51256	7.98383	7.63762	8.04482	6.01009	6.61824	6.557	6.7066	9.55086	7.40461	7.24977	10.4783	7.84414	6.60243	6.53153	6.66086	8.02559	6.98745	6.83615	7.03652	7.5484	6.68863	6.87418	7.58866	6.66899	6.55618	7.7123	5.99591	9.02886	7.71908	8.41582	9.57339	7.19009	6.91169
EMC7	10.296	9.82889	8.33335	9.86722	9.6189	9.37021	10.4652	9.14651	9.20935	10.6017	8.9249	8.80904	9.48407	8.96397	10.0116	9.05761	9.09746	8.75719	10.2694	8.94449	9.26767	8.15393	8.80387	9.24228	9.34315	10.0156	9.61985	9.74625	9.36227	9.56208	9.11788	9.96637	9.24884	8.53559	8.61718	8.64484	8.80847	9.29735	8.76958	8.2084	8.94731	8.43439	11.078	10.3904	10.4894	10.65	11.3466	10.6797	10.2143
TMEM214	8.72421	8.58632	8.35255	8.75722	8.92907	8.54576	8.54755	8.74711	8.59615	7.56846	8.64575	8.73572	8.32822	8.19533	8.64279	8.65173	8.39763	8.1495	8.66363	8.47034	8.84745	8.49583	8.32699	8.46051	8.33991	8.84855	8.39498	8.66363	8.01897	8.36429	8.40329	8.69493	8.57965	9.08056	9.03078	8.82358	8.82778	8.73003	8.95083	9.48199	9.29142	8.47963	8.82334	9.27174	8.70288	9.34703	9.13544	8.90383	8.56396
IARS2	10.5945	10.4916	9.59235	10.7364	9.483	10.3552	9.94366	9.89495	10.0236	10.7343	10.3687	10.1115	10.6674	10.7662	8.09611	10.8486	9.90814	8.80321	11.4055	10.0445	8.4569	9.4631	9.0016	9.24662	9.15752	10.4033	9.8231	8.81522	10.7771	9.61996	9.35823	10.1798	10.1695	9.25025	9.29964	7.66667	9.4209	8.78709	9.20723	7.81799	8.79177	8.79305	11.8482	10.7733	11.5924	11.0233	11.6236	11.5022	10.9013
DSG2	11.038	10.479	10.1445	11.0393	10.7239	10.5876	11.1672	11.0367	9.54659	12.9092	11.5643	11.5879	10.6208	12.6741	11.6172	12.6369	10.5008	10.4541	11.5292	11.1418	10.6693	10.1928	10.0409	9.87914	11.2941	10.3444	12.7853	11.656	10.1029	11.3516	9.59173	10.4682	10.613	11.0761	11.0271	9.02123	10.6109	9.85015	10.3291	10.441	10.3642	10.5073	11.7764	11.7204	11.6447	12.7785	11.5946	11.9814	11.4874
HERC2	8.46599	8.06503	6.54945	8.56023	8.17024	8.41158	8.78976	7.45733	7.81653	9.53231	7.48954	7.95853	8.22992	7.73256	7.9153	8.34067	7.81739	7.95897	8.9179	7.97417	8.62358	6.78249	7.82858	8.45695	7.92833	8.49598	8.39963	7.98526	7.73116	7.88038	8.05384	8.02132	7.98575	7.33723	8.09907	7.10727	7.60328	7.89392	8.29889	8.18705	7.30866	7.31726	9.55527	9.13425	8.75206	9.37564	9.16592	8.99153	8.4695
STRN4	5.47841	5.59835	5.84741	6.33836	5.69899	5.66553	5.79784	6.00537	6.47239	5.37078	5.38877	6.14158	5.3901	5.41073	5.77105	5.73623	6.02533	5.88436	5.49384	6.43487	5.96352	5.85365	5.59249	5.82052	5.71564	5.77999	6.00167	5.88711	5.3591	5.81747	5.99699	5.95145	5.71446	5.7027	5.96088	6.04761	5.48742	5.81179	6.61111	6.51757	5.8899	5.51002	6.28647	6.34924	6.57196	5.97524	6.67057	5.72178	6.6337
KLHDC2	9.10056	8.41704	9.24522	10.4977	9.0671	9.3823	9.03624	10.1885	8.50778	9.44269	9.54901	7.8382	8.39873	9.34103	8.34402	9.32429	8.50388	8.11143	9.06554	8.0525	7.6898	8.67424	9.81454	9.60929	8.1163	8.90736	9.6082	9.30709	8.305	9.25989	8.63665	8.81949	9.1646	8.15084	8.93705	7.85453	8.73769	8.54137	8.33141	8.56726	8.1013	7.83304	10.1537	9.88545	10.7018	9.89315	9.84033	10.7728	11.1124
MRPL18	10.5843	10.8576	8.84201	10.4877	10.2387	10.2983	10.6436	10.0737	10.2928	11.4487	10.2401	10.2901	10.2579	10.8545	9.46146	10.299	9.72948	9.51588	9.51766	10.1789	9.83703	9.147	9.3612	9.0336	10.4129	10.5223	9.91511	10.6732	11.0161	10.1783	9.44677	8.66084	9.75847	9.08805	9.72767	8.96947	9.61333	10.0455	9.68699	9.42924	8.85129	9.67207	11.0025	11.6199	11.1815	10.597	11.9624	11.6748	10.7224
DCAF6	9.40139	9.20581	8.84183	10.3559	8.58951	9.05963	8.82885	8.82099	9.36741	9.14786	8.93874	9.22818	8.71834	8.84923	8.70063	8.6826	8.17649	8.66791	9.9677	8.95545	7.18627	7.89391	7.65224	8.28783	9.45264	9.40039	8.22977	9.68831	9.71007	8.75655	7.98185	8.94761	9.33055	8.62904	8.53613	7.39111	8.34639	8.22801	8.52926	7.96076	8.12892	8.4681	10.1452	9.51003	10.0866	9.80584	9.36817	9.72992	10.3303
BAG3	8.14287	8.95079	7.80848	8.24807	7.26419	8.52041	7.19569	7.35734	7.55739	7.50192	6.88537	7.59847	7.87575	8.27196	7.35956	7.19529	8.26677	7.16687	7.6052	7.31777	7.75745	6.93888	8.16573	7.08534	8.01763	7.50813	7.67494	8.3672	7.58084	6.12351	7.11832	7.89057	7.02772	6.55635	6.38559	6.33084	6.89222	7.79778	7.92734	6.64422	7.15699	7.15842	9.14394	9.19876	8.69471	9.29273	9.13373	9.18142	9.28413
DUS1L	9.23235	8.67542	8.27889	9.79777	8.81564	8.48523	9.18468	8.09592	8.2119	8.42046	7.59579	8.01913	8.2125	9.12193	8.1567	8.23232	8.3486	8.20396	8.05865	8.27509	8.98165	8.5185	7.88385	8.29273	8.58465	9.38916	8.18563	8.70557	7.99727	8.42843	8.3897	8.11942	8.00991	8.22745	8.2747	8.2081	8.30357	7.89945	8.65914	8.77868	7.45358	7.6701	8.80764	9.97667	9.53649	9.60013	9.24961	9.90238	9.48665
VPS4A	7.55717	7.78737	6.84571	7.40486	8.1683	7.03435	7.35158	7.4336	7.53391	7.17229	7.89448	7.97174	7.07557	7.06396	7.08613	7.1034	7.54168	7.66525	7.64504	7.54506	7.3024	7.44478	7.15662	7.27451	7.57226	7.22518	6.8571	7.41051	7.15044	7.16622	6.78334	7.76839	6.98732	7.1616	7.16645	7.29467	7.31659	7.22895	7.33329	7.43009	7.51	6.96948	7.96549	8.85656	7.69722	7.72252	8.76711	8.52326	8.91651
TPCN1	8.10579	7.88813	7.77986	8.15023	7.75934	7.95462	8.24516	8.11173	8.04005	7.79035	8.23692	7.75972	8.59393	7.79297	8.01356	7.91806	7.57407	8.3652	7.80086	8.46936	8.51403	7.65793	8.31105	7.7391	8.53229	8.53135	7.82534	8.3487	8.84333	8.24426	8.2411	8.1876	8.83987	7.92539	8.24379	8.05828	7.70205	8.20503	7.55087	8.18762	8.19158	8.11564	9.08728	8.5499	9.74544	8.95826	8.84308	10.0476	8.64432
FAM49B	9.4078	10.1513	9.0741	9.90708	8.70879	9.86122	9.78201	9.24389	9.11219	9.68824	8.7707	9.30556	8.45958	10.1974	9.19394	9.26671	9.30247	8.7855	9.06703	8.80761	9.05751	8.65335	9.01735	8.03052	8.7929	9.59468	9.02359	9.67183	9.31836	9.01224	8.63671	10.4691	9.04364	7.57227	8.31746	8.88285	9.06413	8.76516	8.7772	8.28028	8.49615	7.97944	9.18418	9.14369	10.2322	10.1454	9.63515	10.448	10.0917
DYNLRB1	10.6371	10.1404	10.1303	11.2544	10.6328	10.4575	10.6599	10.4381	10.2889	10.8542	10.9949	10.7848	10.3478	10.8725	10.4342	10.8893	10.0013	9.83758	10.6521	10.578	9.89375	9.98514	10.755	9.378	10.5587	10.7536	11.1734	10.7819	10.3676	10.731	9.57107	10.9382	9.8033	9.34201	9.42915	9.34421	10.2238	9.99627	10.3098	9.77684	9.80249	9.98731	11.0173	11.6269	11.0423	11.1675	11.7067	10.8654	11.7498
MAN1A2	9.40894	9.96314	8.83523	9.91693	8.77878	9.50127	9.16119	9.13452	9.20131	9.64739	9.74685	9.47585	9.008	9.67413	9.60652	9.62889	8.98494	8.85159	9.72285	9.57948	8.91267	9.58271	8.59189	8.69893	8.767	9.52816	9.72712	9.99274	9.50942	9.57672	9.35879	9.61101	9.58474	9.42242	8.96711	8.79997	9.60037	9.17745	9.46566	9.09573	8.94765	9.18246	10.1649	9.77224	10.3203	10.3687	10.3855	9.93289	9.25458
PEF1	8.162	7.99584	8.10974	8.38377	8.32506	7.71052	7.92484	8.61798	8.03837	7.8853	7.57798	7.44889	7.35326	7.79568	7.95847	7.63878	7.56843	7.42905	7.55606	7.89427	7.62867	7.57196	7.31066	7.0866	7.73144	8.08545	8.29002	8.56104	8.41108	7.55862	7.0055	7.09409	8.22529	7.34364	7.6923	7.58368	8.17802	7.64261	7.35438	7.03405	7.12234	7.48539	9.39479	8.59836	9.13322	9.20786	9.10753	9.09904	9.65812
C6orf106	10.1197	9.22141	8.74418	9.05324	9.44573	9.06186	10.2709	9.31946	9.17378	10.7034	8.93533	9.5162	8.37657	9.39414	9.52187	9.31322	9.40965	8.9568	9.48573	9.35292	9.10721	9.37309	8.81447	8.89846	9.62072	9.58198	9.12574	9.61004	9.11595	9.13667	9.30642	9.28972	9.12332	9.32725	8.94795	8.86209	9.52107	9.10729	9.21659	9.60212	9.61386	9.25106	9.31543	9.89366	9.10731	9.48352	10.1046	9.13111	9.28301
C19orf53	10.8212	10.7611	10.5794	11.3113	11.1643	10.4798	10.6325	11.594	11.0317	10.9107	11.034	11.2425	10.6511	11.3312	11.0373	11.0388	10.7025	10.8811	10.5338	11.3726	10.5993	10.2651	10.5966	11.7183	11.6224	11.2974	11.6296	11.6532	10.7993	10.9016	10.0651	11.1799	10.701	10.7812	11.022	10.4479	10.5411	10.6191	10.7311	10.8029	10.5515	10.65	11.6609	12.1684	12.2088	11.0204	11.9675	12.3895	12.1188
SPCS1	11.576	11.3934	10.0624	12.5162	11.2354	10.9473	11.6209	10.6734	9.64695	12.614	12.0172	10.8795	11.7325	11.8264	11.0492	11.6961	10.6563	10.168	11.4393	10.2737	10.3276	10.2908	10.5546	10.7592	11.0685	11.2507	11.4537	12.3492	12.0719	10.6709	9.66416	11.4245	10.8118	10.6899	10.447	9.75381	11.0013	10.2069	10.2853	9.95666	9.86329	9.72629	13.0928	12.2326	12.866	12.5821	12.9407	12.1676	12.9593
CNPY3	7.33461	6.97652	7.00866	7.56189	7.45745	7.22933	7.10742	7.71643	6.98373	7.97763	7.25413	7.60861	6.80569	7.77787	7.42945	8.34481	7.39934	7.34131	7.8965	7.56437	7.4654	7.35361	7.18735	6.58867	7.86736	7.4575	9.22892	7.06069	6.88947	6.95805	7.19796	7.12108	7.49861	7.91533	7.24444	6.96447	6.99064	7.29558	7.46667	7.37307	7.42272	7.58655	7.57372	9.50645	7.99662	7.482	8.64669	7.74645	7.94209
MRPS7	8.07588	8.37976	6.97722	9.13927	7.10342	8.44293	7.81147	8.02821	7.18796	7.57346	7.24484	6.98491	7.09656	8.86919	7.01389	8.25287	7.84719	7.24227	7.81245	6.8734	8.05032	7.47435	7.01056	7.21242	7.60172	7.6872	8.29668	8.43285	7.34087	8.18671	7.75903	7.1446	8.13908	7.13887	7.00081	7.77199	7.23612	7.25679	7.60787	7.22977	7.65814	7.04512	8.13322	8.72236	9.27868	9.126	8.64705	7.97305	9.18446
LAP3	12.2406	9.97346	8.95476	10.4064	10.255	10.5527	10.535	10.4459	9.60933	9.0902	8.88375	8.12153	9.72122	10.7773	10.1459	9.03993	9.19916	7.91642	10.2722	9.04291	9.22501	8.7652	7.89091	7.90459	9.92667	8.08815	8.91099	9.8592	11.0294	10.4404	10.2621	10.3619	9.89576	8.43554	7.86489	8.53007	10.6295	8.92743	8.53298	7.08578	7.16969	8.25431	10.4922	11.021	12.2185	10.6766	10.0424	10.0729	11.4528
UQCC1	8.52963	9.29544	9.15689	9.6183	9.20111	9.41297	9.03704	9.40507	9.32469	9.50387	9.58871	9.22914	9.2083	9.16907	9.09677	9.70998	9.04122	9.22795	9.43635	9.0162	9.10214	9.17684	9.42015	8.97794	9.09297	8.93069	9.62245	9.45618	9.3657	9.30554	9.06362	8.82725	9.28775	8.87918	9.34186	8.94798	8.72789	9.19522	9.04945	8.87983	9.07101	8.88491	9.97853	9.22151	9.72446	8.88078	8.91564	9.16298	8.6428
HDAC7	7.09142	6.46792	6.72486	7.27936	6.92085	6.67249	6.7014	7.33622	7.10787	6.73779	6.42233	6.94551	6.96457	6.7408	6.87121	6.86402	6.84574	6.92989	6.78775	7.1083	6.99157	6.46199	6.71941	7.14361	7.14603	7.22632	6.83325	6.86847	6.66267	7.288	6.65122	6.81858	7.04856	7.14389	6.98103	6.60142	6.62128	6.81548	6.92421	7.13539	6.51874	6.73138	7.40163	7.56655	7.06234	7.15804	7.18767	7.45333	7.43618
KCMF1	11.7022	11.4071	10.7904	12.0102	11.668	11.2097	11.9062	11.2399	10.9511	11.8831	10.7301	11.4836	11.1869	12.0299	10.8959	11.1635	11.0602	10.697	10.963	11.1379	10.1346	10.5629	10.6387	10.5294	11.0055	11.5596	11.1389	11.9823	11.9382	10.9587	10.5302	12.0945	10.8511	10.6022	10.2018	9.98137	10.523	10.5271	10.1763	10.6337	10.1115	10.4884	12.148	12.0366	12.49	12.3666	12.9799	12.9437	11.6177
NAXD	8.61662	8.7615	8.11344	8.00057	8.52839	8.83146	8.53213	9.33236	8.39957	8.65639	8.35308	7.94098	9.56725	8.97766	8.85022	9.32591	8.40688	7.51102	8.83277	8.88915	8.36686	7.71703	8.43913	9.01754	7.70446	8.28286	9.33003	9.81759	9.44041	9.19479	7.81666	9.47729	8.38563	7.66005	8.12906	7.67816	9.00501	8.671	7.72957	9.4663	8.07959	8.37333	11.093	8.97563	10.1306	9.58432	10.5441	10.0702	9.79895
ERBIN	8.84812	8.31118	8.49445	9.44392	9.14983	9.10334	9.52855	8.31094	8.20094	10.1389	9.27253	9.53618	9.35533	10.0198	9.46911	9.93586	8.58892	8.33438	9.96999	9.47767	8.46529	8.48346	8.38611	9.4598	8.31744	9.30657	9.14045	9.35212	8.75868	8.7743	9.28368	9.77011	9.42337	8.85343	8.68521	8.14533	8.38966	8.83082	9.05323	8.37196	8.91133	7.95925	10.5495	9.29042	11.0769	9.86894	11.208	10.4507	10.8094
MRPS35	9.948	9.94611	9.03928	9.60405	9.42789	9.62659	9.3808	11.5597	9.74354	9.39842	9.61093	9.38552	9.34114	9.79642	8.37503	10.0515	9.29731	9.26311	10.3527	9.04198	8.50322	8.15687	8.81852	8.88577	9.55738	9.89497	9.69996	9.84752	9.56798	9.73492	8.89545	8.78223	9.04457	8.80066	10.1101	8.47562	7.9978	7.89766	9.08428	7.76919	8.27063	7.85047	10.6281	10.26	11.119	9.771	11.2202	11.2135	10.9964
MAP7D1	7.25594	7.1136	6.59152	7.08465	7.52624	7.3848	7.74933	6.85568	7.151	7.31523	6.82154	7.41699	6.93088	7.74777	7.35462	7.60746	7.56048	7.0576	7.91888	6.96746	6.62471	7.05542	6.67967	6.63259	7.65667	7.94094	7.4322	7.59485	7.88801	7.14763	7.19564	7.03213	7.4337	6.49441	6.98581	6.97611	7.981	7.39421	7.85448	7.05314	6.84018	7.29491	8.03848	8.15205	7.8363	8.043	8.31496	8.8114	8.09684
POMGNT1	6.32322	6.83318	6.03759	6.64872	6.28156	6.73928	6.64549	6.07528	6.20941	6.63896	6.69236	7.10621	6.04791	7.22234	6.58737	7.24308	6.45436	6.18439	7.63099	6.45728	6.36493	6.00314	5.65019	6.1014	7.54559	6.61081	6.74337	7.1705	7.04242	6.58151	6.05827	7.5491	6.46351	6.20395	6.69727	5.94792	6.94591	6.41279	7.30705	6.2851	5.53498	5.94237	7.39896	7.45948	7.23499	7.66676	7.01531	7.7252	7.41477
BTBD1	10.3448	9.37683	8.36926	9.64788	8.84233	9.93982	10.2644	8.77047	9.90911	9.80063	9.37797	9.07524	9.82641	9.29243	9.72618	9.34459	8.88218	8.47971	9.89549	8.44149	8.99413	8.90121	8.99777	8.71294	8.09667	9.55426	8.91749	9.79619	10.5547	9.79675	9.19722	10.2622	9.60816	8.30876	8.40428	8.84613	8.65298	8.55416	8.92433	7.96218	8.30949	7.83729	11.291	10.1324	11.0273	11.1614	11.1289	10.7212	10.5806
SAE1	7.38335	8.10721	7.31265	8.93951	7.99714	8.0473	7.95277	8.09259	7.81359	8.81002	7.72373	7.72045	6.83757	7.76283	7.71228	8.63763	8.34414	6.71878	7.85675	7.71744	7.11089	7.64327	7.40742	7.11878	7.09261	7.40637	8.66377	8.17833	7.27977	6.94161	7.07967	7.18737	7.64944	6.54255	6.9253	6.51981	7.16529	7.6012	6.8732	7.52705	7.60839	6.61194	9.4912	8.16783	8.42796	7.91735	9.55907	8.68132	9.14561
CMTM6	12.6513	10.5568	10.4071	12.4231	11.8922	11.6571	11.9673	11.8268	11.5065	11.9527	11.35	10.8554	12.1828	11.8085	10.2994	11.5128	9.80293	11.3849	10.5767	10.3063	10.7227	10.717	11.1458	10.9638	10.261	13.1719	10.3843	12.2332	11.8773	11.8821	9.28549	11.8857	10.9523	9.73034	10.9948	10.4874	10.889	11.0182	11.0412	10.0548	10.4445	9.83555	11.2096	11.8655	12.6074	13.2552	12.4094	11.7371	12.6588
RTL8A	7.54968	6.37612	7.11771	7.34523	7.61721	7.19221	6.9488	6.85388	7.05117	6.47177	7.5482	6.34488	6.56996	7.77215	6.49977	6.99822	7.17113	6.87575	6.51082	7.54146	6.43249	7.25506	7.03411	7.12619	6.7314	7.17775	7.19221	7.38165	6.88544	6.23262	6.84578	6.58449	6.82786	7.55671	6.19873	6.18529	7.01731	6.95991	7.43497	6.85039	6.44242	6.00007	7.77078	7.74366	7.23185	7.63864	7.47525	7.29774	8.38839
VKORC1	8.47635	8.9134	9.15931	9.09892	8.59734	8.74386	9.082	9.34158	7.96897	8.9896	9.76396	8.79199	7.97296	9.27813	8.9652	8.93776	9.32226	8.31189	8.94164	8.32486	8.08062	8.79453	8.65602	8.72001	7.64253	8.61733	8.44475	8.83735	8.71842	8.13526	7.84656	8.03199	9.10697	8.1135	7.56208	8.29638	7.8737	9.00141	8.99371	7.67539	8.56321	8.27313	10.4453	9.35076	8.89728	9.53043	8.83335	8.66968	9.73921
NOSIP	8.23089	8.51912	8.43213	8.94784	8.47924	8.95572	8.23569	8.68272	7.77418	8.45099	7.91802	8.14928	7.69693	8.29791	7.95968	8.98007	8.66924	7.79176	7.88843	8.4106	7.966	8.0046	7.68852	7.69961	8.33751	7.70139	8.78701	9.80997	9.04039	8.39045	7.75707	8.2932	8.03342	7.35295	7.45739	7.47421	7.61908	8.28344	7.66598	8.64185	7.4979	7.49954	9.45386	9.24941	9.60524	8.6695	9.68716	8.96944	10.0505
PHF3	10.1332	8.89637	9.00544	10.7129	8.78342	9.82395	9.91252	9.22592	9.42715	10.8321	9.96489	9.69167	9.4048	10.4805	9.68312	10.5214	9.69413	8.53056	10.5739	9.49177	8.86184	9.2557	8.93513	8.60805	9.37886	10.0657	9.74863	10.6904	9.06153	8.89856	8.5852	9.93894	9.85811	9.6536	9.51591	7.89849	8.69602	9.27595	9.33255	9.00638	8.77455	8.50249	10.2582	9.87622	10.5421	10.6558	11.228	10.903	10.7192
BCL2L13	7.53215	7.99125	7.77773	8.37768	6.84336	8.12564	7.34508	7.8504	8.06145	8.76995	7.21498	8.63966	7.67273	8.6756	8.75461	6.924	7.27088	8.07323	7.29402	5.80513	6.80265	7.42244	6.36809	6.98702	8.09251	7.41723	6.08725	8.86477	8.26668	7.42917	6.86059	8.37316	7.63118	8.07022	7.15026	6.21514	7.62933	6.87747	8.20059	7.44552	7.0221	5.98893	8.00745	8.4126	8.61847	8.40948	7.80022	8.39067	8.9631
ENOPH1	9.77864	9.85318	9.15862	9.45251	8.85995	9.30892	8.75806	9.16021	8.77638	9.74827	9.34816	8.67455	9.38432	10.3905	8.98129	9.45251	9.14558	8.48612	9.54749	8.75871	8.12189	9.3074	8.61482	8.83354	8.54916	10.0888	9.47452	8.67414	9.1614	8.72045	8.51673	9.77889	9.14972	8.89724	8.5559	8.54722	8.79181	8.60099	9.31468	8.85197	8.58941	8.20418	9.22195	9.57048	10.0819	10.3491	10.608	10.2569	9.76908
CFAP20	9.36729	9.85576	8.68419	9.17572	10.062	8.56202	9.73673	9.5746	9.82797	9.26686	9.54318	9.64601	9.71791	10.5901	9.05589	9.90236	9.57538	8.80618	9.82296	8.70112	8.37388	9.37248	8.55794	9.04216	8.95866	9.03196	9.08542	9.57054	8.71459	8.83486	8.34566	9.46086	9.41031	8.34539	8.68576	7.78833	8.75178	9.08586	8.77022	8.07558	8.96687	7.85811	11.1957	10.1715	10.0471	9.94225	12.169	10.9013	11.4698
SLC25A38	10.3431	9.0531	8.31684	9.96655	9.13496	9.20406	9.13932	8.52243	8.75854	9.65678	9.61585	9.55471	9.773	9.53085	8.10272	10.538	8.61382	9.00287	9.5219	9.31572	8.55954	8.53651	9.3872	9.69402	8.74487	10.7405	10.3266	9.00887	10.0176	8.78128	7.89251	11.0224	9.86101	9.14124	9.29308	8.21988	9.12108	8.81206	9.30435	8.8325	9.64213	8.41238	10.5237	11.3444	10.0539	9.99766	9.63527	9.84621	10.2819
NOP10	9.07858	9.38325	8.59404	9.53749	9.2598	9.66343	8.83518	8.76037	8.48583	8.26761	8.11626	7.77818	8.51411	9.20225	8.7495	8.34916	8.55008	8.60646	9.36245	8.59768	8.68158	8.11414	9.10063	8.49385	8.82574	9.46679	9.69468	9.06911	7.95055	8.89815	8.69072	9.3074	8.96772	7.88272	8.69397	8.53935	8.30918	8.75822	8.44652	8.03733	8.34079	7.7842	9.71177	9.58025	9.84439	10.62	10.3975	9.73546	9.75324
BEX3	13.0304	12.1098	12.2348	12.8991	11.9689	12.7405	12.7002	11.8457	12.3136	12.5035	12.4999	11.4572	12.1208	12.1923	11.791	13.0019	12.3885	11.4449	13.1473	12.3538	11.234	11.9703	12.0078	11.8999	11.4298	12.845	13.0525	13.1815	12.6587	9.91084	12.1445	12.9749	12.5267	11.4269	11.4132	10.7887	12.6026	11.7708	11.9249	10.2868	11.4522	10.701	13.4961	12.6933	13.3209	13.3204	13.3697	13.6098	13.4711
TTC19	9.54709	8.9747	8.36295	9.34375	8.38183	8.96656	9.43135	8.33718	8.74099	10.4929	9.51607	8.8942	9.66113	9.54963	9.33264	10.3719	8.79332	7.96844	10.3059	7.79451	8.54778	8.43026	7.82273	8.87507	8.09684	8.82355	8.97278	9.73733	9.46264	8.32852	8.46616	9.13423	9.02296	9.08274	8.24878	7.30353	8.80794	8.13988	8.95194	8.29445	8.2385	8.10633	10.722	9.50095	10.0411	9.89795	9.66681	9.31219	9.49325
SAP30BP	7.09027	6.89588	6.70926	8.10027	6.45803	7.07222	6.86435	7.27478	6.36842	7.28012	6.90421	6.41433	6.87536	7.5859	6.76307	7.60259	7.45065	6.28377	7.08975	6.53544	6.92775	6.06041	6.60707	6.91283	6.85865	6.42524	7.57258	7.84717	6.06616	6.87355	6.4828	6.33297	6.63806	6.54139	6.90652	6.85528	6.41034	6.53407	6.8262	7.42384	6.73722	6.81472	7.45894	8.00715	7.73668	7.89426	7.80207	7.15085	8.01721
FAM129A	7.28947	8.22307	8.58493	5.6457	6.30803	6.32612	8.31601	6.58864	5.50548	5.38146	6.47515	5.5947	6.09043	5.59602	6.65588	5.42703	6.01246	6.06788	6.38991	7.33556	6.88445	6.04906	6.18469	5.50755	7.44038	8.51871	5.7068	6.38186	6.61995	6.25205	7.11845	8.47684	5.78441	8.82025	5.86567	6.05739	7.35132	6.76956	6.24642	7.76629	6.74019	6.93507	5.60619	6.11708	6.77279	6.1935	6.0588	5.94944	7.31273
EIPR1	8.17937	7.52153	6.9246	8.35755	7.60537	7.42771	6.7598	7.44246	7.2706	7.18273	6.7615	7.38168	7.42858	7.40912	6.84298	8.00244	7.26313	6.21641	7.40951	7.02081	6.39668	6.66028	6.91562	6.65802	7.15549	7.44749	8.04701	7.82772	7.2205	7.28155	6.97174	7.06684	7.29907	6.49968	6.57964	6.38535	6.97456	6.34951	7.07342	6.68062	6.58557	6.97361	8.06507	8.56068	8.57696	8.23787	8.09052	8.82875	8.71858
VPS51	9.51511	9.30063	8.33619	10.4802	9.21958	8.57744	8.86746	9.0994	8.8892	10.0221	8.63108	9.27001	9.32799	8.71631	9.16547	9.16799	8.83298	8.97286	8.59761	9.78273	8.64409	9.12795	9.39663	9.57303	8.80092	9.65681	10.0151	10.9368	10.7148	8.82245	9.06747	9.8637	9.51515	9.03665	9.38687	8.84336	9.10586	8.98392	8.52956	9.02846	8.35278	8.31218	11.9386	10.5186	11.6867	11.0515	10.7442	10.7227	12.2981
LAMTOR3	10.1871	9.00661	9.45278	9.44613	8.57852	9.58894	9.32297	9.53303	8.42921	9.53902	9.23823	8.48879	9.35066	10.3711	8.75673	9.56764	8.63583	8.05251	9.82217	8.09986	8.33713	9.38987	8.39869	9.3703	8.74199	9.18039	9.75364	9.2921	8.9246	8.64835	7.86501	9.65688	9.11881	8.10343	8.85867	7.49939	9.34962	8.34439	8.61509	8.25721	8.24229	8.23436	9.96676	9.83851	10.6606	9.90619	9.92888	10.1783	10.3855
CHCHD3	10.87	10.3231	9.65089	11.4722	10.282	10.1404	10.8264	10.8401	10.6597	11.188	10.2378	10.094	10.3886	10.4455	10.3463	10.8162	10.3489	9.44651	10.3768	10.0339	9.69523	9.74928	9.13243	9.82712	10.4444	11.101	10.8618	10.6169	11.1973	10.4657	9.7951	11.6855	10.1708	9.8503	9.51831	9.3877	10.2908	9.65409	9.47766	9.28188	9.22143	9.47054	11.5061	10.8608	11.7475	10.8585	11.453	11.674	11.2361
DCXR	8.00697	9.62101	7.89381	9.35742	8.11188	7.62552	8.8853	8.53604	7.21271	7.73574	8.07484	7.28547	7.65838	8.61722	7.13632	7.82839	7.93515	6.58284	7.44506	7.38128	8.46643	7.23906	7.51987	8.64159	7.55513	7.83002	8.18733	8.54386	7.67842	8.04707	8.08672	7.0686	7.46485	7.31175	7.80343	7.33222	7.07448	7.37026	7.70779	7.68927	7.2161	7.46375	8.92725	8.41779	9.06511	10.0023	8.91968	9.03904	9.66386
TCEAL9	10.8459	9.86411	10.3213	11.1252	10.3412	10.8338	10.8714	9.03316	10.9412	10.8256	11.043	9.18972	10.03	10.9083	10.1543	10.7246	10.7936	9.77496	10.8292	10.645	9.22939	10.2971	10.4165	10.4694	9.71675	10.9654	10.6735	11.0312	9.35665	7.90958	9.53642	10.7226	10.5516	9.55816	9.92896	9.31802	10.6319	10.4723	10.1501	9.26696	9.92208	8.9327	12.0293	11.0307	10.6963	10.8905	11.4431	11.8773	11.2469
DYNC1LI1	7.88639	7.93023	6.50752	8.66601	7.51536	8.68899	7.73862	7.72359	8.20408	8.5875	9.05113	8.32939	8.02096	8.21527	7.93671	9.06982	7.73451	6.26371	7.07777	7.39061	6.74623	7.46595	7.42934	7.02828	6.93151	8.54526	7.13934	7.98907	8.09976	7.99238	6.88087	7.35544	7.03866	6.71904	6.7276	7.06372	8.27196	8.13774	7.28429	6.58548	6.89172	6.40436	8.25266	7.66255	8.37973	8.2607	8.89985	9.06832	9.25587
MSRB1	8.98492	8.62731	8.57409	8.72348	8.90573	8.01791	8.14752	8.54492	7.99489	8.90979	8.05377	8.74771	8.4002	7.96736	8.50294	7.71866	8.50144	8.73455	8.63174	7.81306	7.99611	8.58375	8.37829	8.42045	8.50785	8.47011	8.89336	8.4002	7.88517	8.39234	7.89697	7.19073	8.57656	7.74364	8.72666	8.41407	8.27495	8.78434	7.70245	8.07448	8.62244	8.5611	9.09926	8.93751	9.04849	7.99061	9.55744	9.66829	8.47972
UBE2Q1	9.4631	9.21314	9.47672	10.3618	8.83849	8.99575	9.24459	9.38266	9.31933	9.36534	9.33492	9.47944	9.50201	9.44279	9.26378	9.57654	9.06587	8.60966	9.91293	9.27003	8.50166	8.7045	8.60622	9.13864	8.92561	9.26379	9.5202	9.43757	9.25312	9.04478	8.75276	9.42471	9.07017	8.90463	8.50035	7.92923	9.05372	8.90303	8.55439	8.44631	8.48903	8.40182	10.6245	10.0228	10.5038	10.747	10.1125	10.3937	11.2907
TSPAN13	10.9353	10.9146	11.1435	10.8586	10.4346	10.0991	11.2989	10.0088	7.34423	11.7261	11.1568	11.1514	9.73923	11.3947	11.8506	11.2372	9.65057	10.0058	11.5824	11.3807	10.1456	10.607	10.8184	9.62682	10.4687	11.3439	10.9515	11.5171	10.7235	8.51547	10.5588	10.6472	10.2557	10.5761	10.8091	8.90686	11.5776	9.53359	10.1865	11.7102	10.5166	9.95002	11.1713	11.7169	12.1162	11.1226	13.1519	12.1192	12.0389
MRPL16	8.77374	8.90868	7.49498	8.76261	8.42481	8.04897	8.53497	8.58595	8.08856	8.75021	8.30702	7.2249	7.45815	7.87972	8.17532	8.1551	7.94662	7.6489	9.31732	8.57473	7.77729	8.22094	8.28673	7.8888	8.29727	8.28822	8.44489	8.53498	8.49229	8.6099	8.11911	7.65132	8.07463	7.74376	8.34928	6.79866	8.31773	7.94273	7.56732	7.35663	7.24128	7.212	9.55464	8.939	9.89457	9.18171	9.10399	9.94498	9.51982
MORF4L1	13.0642	11.517	10.9956	12.3878	11.3863	12.4877	12.9525	11.899	11.9032	12.9097	12.2313	11.5462	12.3413	12.7851	12.3739	12.6923	11.5237	10.9043	13.1368	11.1922	10.9535	11.1905	11.6289	11.2348	11.1577	12.7401	12.2619	12.9152	13.1255	12.1594	12.0071	12.7069	11.9961	10.7882	11.5625	10.9791	11.5661	11.4311	10.9148	10.3969	11.144	10.7904	13.0865	12.5183	12.8663	13.1763	13.3465	13.3533	12.3508
RNASET2	10.8109	9.40917	9.34812	10.8465	10.5132	10.3233	10.8868	10.6048	10.6963	10.9218	10.4108	11.4741	9.97989	9.7427	10.0008	10.3554	10.0467	10.5185	11.2385	11.2154	9.76762	9.23231	9.86032	9.01268	10.3132	9.82694	9.59661	10.6606	10.1327	10.9589	9.20084	11.4651	10.775	9.77206	9.74333	8.94231	10.1682	10.343	10.1494	10.2865	8.62324	9.51312	11.6232	11.5976	11.2346	10.9746	11.4948	12.687	10.9068
BAZ1A	8.78767	8.98733	9.24238	9.07558	8.01962	9.07567	8.85725	8.53569	8.99123	9.05075	8.70217	8.35866	7.97551	8.4794	7.6093	8.064	7.68675	7.2831	7.64555	8.3162	7.50142	8.63313	7.96284	7.25305	8.17057	8.80305	8.25294	8.64902	7.92468	8.59641	8.05014	8.05616	7.35557	7.88263	8.03688	7.18264	8.80313	7.69912	7.73535	8.50569	7.35081	7.66505	9.23467	9.07049	9.3289	7.94966	8.77548	10.2817	9.95203
ASNSD1	10.2772	9.92823	9.24128	10.9402	9.19401	10.1536	10.1121	8.76442	9.16609	10.4547	10.1991	9.80004	10.2962	10.9793	9.88404	10.1121	9.44803	8.9176	10.5666	9.16896	8.80799	8.96231	8.97018	8.84502	9.75058	9.43519	9.04382	10.6819	10.6459	9.99501	8.83297	10.2488	9.2685	9.19608	9.40149	8.1835	9.326	9.20725	9.60752	8.90339	8.95213	8.56121	11.3769	10.0845	10.5251	11.2481	10.6166	10.3845	11.4827
CCNB1IP1	9.12974	8.16403	9.05839	10.2692	8.4113	9.07933	8.66171	9.71954	7.96374	9.92523	8.63603	9.20136	8.96015	9.33264	8.75745	10.6117	8.52207	7.56737	9.29636	8.30153	7.78077	8.31565	9.28296	9.14972	8.15667	8.97919	10.3029	8.79582	9.46111	8.08652	8.61578	8.31816	8.90156	8.39378	8.85963	7.99276	8.8056	8.02979	8.40427	7.9423	7.96017	8.1985	11.1194	9.1608	10.725	8.5831	11.3157	10.7052	9.0648
HSD17B11	8.31908	8.46596	8.78411	9.61053	8.06881	9.00659	7.62357	8.65825	5.90967	9.0441	8.47797	8.65461	8.37798	10.365	7.54832	8.82128	8.51534	9.29489	9.23455	8.62639	6.87546	8.66139	7.94832	8.4373	8.43269	9.81026	9.08552	9.16452	7.07351	8.01284	7.67028	8.84436	9.30108	7.89986	8.66779	8.19982	7.09383	9.24283	8.78036	7.21135	7.80911	8.08961	9.89891	9.87928	10.2088	9.4154	9.78183	9.14632	8.23912
GMPR2	8.66979	8.30442	8.92527	8.94296	7.58864	8.6487	8.6064	9.32658	8.47614	8.77373	8.68219	8.095	8.88872	8.4472	8.21018	8.57201	8.55258	7.05002	8.8612	7.47164	7.89723	7.50926	8.24363	8.15076	7.87225	7.178	8.12308	8.76267	8.61577	6.97191	7.95474	6.82249	8.58603	7.87364	7.41194	7.30777	8.15203	7.68216	7.15202	7.25249	7.67656	7.2203	10.5122	8.37076	9.85998	7.92896	9.20988	9.49987	9.14588
EFHD2	6.90508	7.1315	7.33312	7.19392	8.01258	6.95618	7.26947	7.74582	7.48592	6.77261	7.0979	7.02558	6.9239	7.0407	6.90516	6.86603	6.25496	7.13145	6.60819	7.8139	7.02818	7.10219	7.19709	6.74275	6.66357	7.71133	7.31217	7.41048	7.45884	7.99174	6.71389	7.48582	7.33133	7.5044	7.55586	6.99338	7.24532	6.85709	6.89894	7.75221	6.06407	6.72479	9.76569	8.20674	8.45451	8.11044	8.09816	8.8417	9.34527
MAT2B	11.6609	10.6813	9.28284	11.4158	9.62815	10.9764	11.4232	10.6261	10.7534	11.4209	10.9636	10.5945	11.0063	11.4739	11.2479	10.8138	10.8482	9.94256	11.1972	9.68729	9.74801	10.1342	8.94354	10.1332	9.92425	10.8854	10.017	11.0088	11.207	10.7847	10.1855	11.2414	10.6835	10.7638	9.99015	9.18126	9.49278	10.086	9.83685	8.52122	9.46866	9.75307	12.4489	11.236	12.4896	12.2452	11.0183	10.8717	11.986
SQOR	9.88332	9.25468	7.945	8.64723	8.7772	8.57386	9.63871	5.80544	6.27218	6.75639	5.86287	8.42845	8.95946	7.4927	8.1933	6.3097	6.75027	7.9669	8.48268	7.84873	8.61828	7.46731	7.27348	7.78565	9.12022	8.12531	6.42054	8.13267	9.26006	8.50011	8.72432	8.49417	8.16904	7.69799	7.97783	7.94174	8.5306	8.32554	6.96919	7.89056	6.09884	7.10443	9.45455	8.77058	9.15635	10.2604	6.73333	9.11928	9.35074
PHLDA1	8.8441	9.04772	9.46464	9.0787	9.30654	8.90164	8.70208	9.03547	9.57685	8.28012	9.27125	9.12867	9.03862	8.73638	9.08592	8.78018	9.38778	9.43664	8.66972	9.06111	9.93787	9.63829	9.04258	8.83682	8.78372	8.85103	9.30928	8.56108	8.31981	9.37831	9.42843	8.8654	9.12882	10.1023	9.70209	9.47718	8.90454	9.59388	8.92578	9.29347	9.96706	10.1544	7.74617	7.81541	7.01727	7.65351	7.67823	7.38814	7.09143
MRPS2	8.86596	7.4713	7.47975	8.70259	7.96933	7.97868	7.35004	7.849	7.17797	7.95892	7.35599	6.50532	8.38145	7.84206	6.51547	7.58842	7.3465	7.05097	7.55071	7.81763	7.36726	7.60212	7.1911	7.42948	7.13425	7.90347	7.46943	7.56906	8.44957	7.68777	7.94974	6.70601	6.72196	6.49437	7.33376	6.77616	7.62493	6.70645	6.95862	6.0941	6.19536	5.73148	8.88887	9.12386	9.2973	8.61747	8.93412	8.39049	8.81155
FKBP3	9.65702	9.89791	9.08545	10.7315	9.95952	9.6578	9.57621	10.4551	9.06452	10.0949	9.06303	8.46355	8.22797	9.6345	8.74683	9.2744	9.49326	8.92069	9.89586	8.62326	8.05683	9.38469	9.13885	9.06801	9.05794	9.12896	10.0684	10.8208	8.87153	9.41103	9.69782	9.37085	9.03704	7.00504	8.58337	7.84538	9.97399	8.80219	8.91545	8.36588	8.96366	8.54615	9.98066	9.5217	11.3594	10.0707	10.6685	11.5584	10.9143
BSDC1	7.57006	7.50093	6.44921	7.47432	7.79116	7.0136	7.03412	7.15625	7.54215	7.11491	6.70474	6.99734	6.42849	7.09755	6.99475	6.90283	6.36989	7.03692	6.35732	6.76349	7.19257	6.74988	6.5462	6.59332	8.02212	8.22919	7.51327	8.07993	7.71409	7.08927	6.16829	7.54832	7.22249	6.38458	7.26394	6.48536	6.97402	6.83383	6.77239	7.18497	6.46086	6.39672	7.55187	7.85291	8.22421	8.5154	8.89421	8.33242	8.65854
ZNF22	9.68619	8.88626	9.32999	9.40054	8.77761	9.07161	8.93879	8.87261	9.12487	9.99513	9.1292	9.33407	8.36193	8.82571	9.09106	9.93762	9.07094	8.6444	8.75386	7.96845	8.49315	9.42003	9.41387	9.61168	7.7168	8.45697	9.86939	9.17565	8.40547	9.58242	8.59904	8.54841	8.62129	7.4352	8.70535	8.27002	8.48098	8.80922	8.46519	7.69024	8.86611	7.84643	10.1305	8.7485	10.2267	9.73167	11.3653	9.36052	10.0458
RPS27L	10.4494	9.49798	8.80833	10.5464	10.3431	10.2592	10.436	9.05367	9.90899	9.35519	9.28204	9.55471	10.205	9.85351	10.2714	8.82779	8.90924	9.34783	9.73917	10.0445	9.44863	9.16563	9.98405	10.2843	9.43652	9.31575	10.2883	9.83713	10.9352	10.0028	9.90232	11.0759	9.73339	8.94052	9.20821	9.50076	9.6089	10.0119	8.9836	8.93268	8.78694	8.69607	11.4079	10.488	11.3137	11.6026	10.4387	10.723	10.9054
PRC1	9.41481	9.28376	8.50911	7.5754	9.68622	8.97124	8.79275	9.45142	9.25599	8.94253	8.41666	7.93634	7.02455	10.6347	8.62349	9.12399	8.93833	7.63333	8.81175	8.76925	7.34389	8.04625	8.70234	7.10251	8.83061	9.36047	9.47536	8.78396	7.85734	9.11712	8.81737	7.27285	8.79405	6.16171	8.50373	7.73374	8.77626	7.93981	8.99742	7.36095	8.37079	7.72427	9.5375	10.0788	9.78346	10.1496	11.0789	10.3602	10.4676
UBL5	9.4265	9.7072	9.31719	12.1225	9.9646	9.32268	9.85836	10.0379	10.3755	11.2071	10.9441	9.33705	9.32886	10.8539	9.07494	10.7037	8.90822	8.81183	9.82036	10.9096	9.22803	9.38565	9.94386	8.83244	10.2501	9.65756	10.9715	10.3731	9.65301	9.81541	9.65	10.6465	9.73872	8.66242	10.8084	9.58774	10.2242	9.62296	10.2136	9.40443	8.28799	8.6411	11.4107	11.0318	11.01	10.3228	11.6865	11.9699	11.4052
TSPYL2	8.24958	8.18866	8.32191	8.32292	8.62644	8.2706	8.52366	8.15058	8.42149	8.1422	8.41345	8.5002	8.32215	8.36909	8.36497	8.35451	8.54131	8.32281	8.41419	8.49229	8.1437	8.09459	8.25959	8.61519	8.3829	8.33943	8.52887	8.44004	8.08843	8.31137	8.05065	8.28552	8.62807	8.85419	8.54708	8.68678	8.40816	8.53976	8.64573	8.85366	8.19752	8.44843	9.3982	8.54708	8.71256	8.57047	8.85754	8.93141	8.29509
NUP85	7.71528	7.69403	7.47163	8.81278	6.83881	8.44655	7.90012	8.34079	7.32503	7.92416	7.356	7.25648	6.86995	8.39961	6.85616	8.23911	7.98421	7.14498	7.41715	7.57775	7.56811	7.16877	7.15721	7.2213	7.70686	7.46314	8.34544	8.13127	7.42128	7.61471	8.04589	6.65906	7.60701	6.52518	7.21422	6.99454	6.97785	7.19944	7.4257	7.63668	6.5526	7.0151	7.98104	8.56707	9.08849	9.80609	8.95588	8.11346	9.70978
HGSNAT	8.17523	7.58561	7.95511	8.49999	8.34905	8.61258	8.8467	8.37334	8.83978	8.58172	8.88249	9.51104	8.06598	8.21483	8.65215	8.60537	7.99875	8.78931	9.32239	8.24617	8.41133	8.46488	7.59487	8.32984	8.53759	8.17584	7.14852	9.41528	8.2408	9.00404	7.99833	8.9784	7.48641	8.12876	7.92736	7.96524	8.24276	8.96466	8.24915	8.60849	8.72203	8.26125	8.61708	9.67823	8.80284	9.15185	9.88054	8.36623	8.82766
PDXK	10.3333	9.09429	8.61361	9.73356	8.71674	8.36512	10.9772	8.79363	9.04381	10.1631	9.90621	9.73685	10.2418	8.38823	9.21537	9.39687	9.50269	10.3125	8.40633	9.87843	8.76558	8.98599	9.0128	9.15065	9.09695	9.47762	8.31861	9.57791	11.5853	9.55813	8.86149	10.3526	8.76414	8.63635	9.35007	8.36199	10.1711	9.76112	7.46346	10.4194	8.00603	9.06081	11.593	9.70199	8.6056	11.3108	8.16709	10.7957	10.2973
ZFAND3	6.74695	6.90567	7.17638	6.84778	7.41214	7.27029	7.49884	7.12111	6.96966	7.5252	7.3778	7.39274	7.07594	7.72133	7.55156	7.83822	7.1707	7.0743	7.82374	7.22838	6.6697	7.24581	7.60537	6.64973	7.46569	7.58369	7.95794	7.52102	6.73814	7.37454	7.23576	7.08689	7.23645	7.88638	7.47961	7.3585	7.09753	6.82712	7.25481	6.90896	7.04338	7.08907	7.54022	7.6229	7.01839	7.62181	8.62235	7.62984	7.83833
VRK3	7.8173	8.02714	7.95154	8.42978	7.12213	7.9122	7.86249	7.6983	7.92667	7.87894	7.50831	7.54215	8.05825	7.77946	7.84732	8.14684	7.61404	7.44271	7.94672	7.83072	7.9188	7.82909	7.48516	7.74768	7.73564	7.48947	8.01607	8.06383	7.98569	8.02597	7.71752	7.91655	7.96402	7.50121	7.63932	7.20895	7.45234	7.46646	7.66236	7.93975	6.88869	7.38538	8.41951	8.07491	8.51983	8.76401	7.92812	8.28452	9.13119
FAM53C	8.71488	8.42234	7.59558	9.18257	7.93629	8.26246	8.89735	8.46997	8.29514	8.76045	8.12168	8.28786	7.8943	8.16998	8.81787	8.69871	8.56915	7.73377	8.45236	8.3998	8.26979	8.03565	7.89686	8.99053	8.41011	7.7302	8.83827	9.10163	9.10626	8.48489	8.38287	9.20323	7.89657	7.1501	7.72377	7.12556	8.28361	8.22768	7.80922	7.55138	8.15065	7.92237	9.44447	9.53464	9.81495	9.51838	9.49648	9.65029	9.42828
MPC1	7.91199	10.0218	7.82301	8.61059	8.74441	7.72603	8.55346	8.4582	8.11888	9.00057	8.38463	8.48844	7.90177	7.17183	8.49995	7.55708	7.55949	8.43206	6.95065	8.31401	7.8537	7.29178	7.18307	7.36002	7.77242	7.63292	7.7596	8.74501	9.08836	9.16804	7.80682	8.00655	7.46338	8.22392	7.69919	7.69666	7.74111	8.05347	6.62195	7.46249	7.33497	7.16314	9.04677	9.18264	9.39169	8.65985	9.7289	9.1662	9.1637
ECI2	8.8912	7.28308	7.97623	10.3435	7.56418	8.06195	7.66093	8.66714	6.41525	10.085	9.32097	7.03523	7.54234	9.58046	8.5229	9.45674	8.55871	6.70304	9.83012	7.72078	8.01752	7.84299	7.91182	8.24229	7.82697	7.33651	8.72508	9.00002	6.99698	6.47632	8.65367	7.67316	9.11042	6.96044	7.72915	6.99655	8.07071	7.86603	9.33975	5.72095	7.46514	8.02003	9.17364	9.95638	9.27909	9.63107	7.84708	9.67793	9.26333
COA3	9.12283	9.61624	8.9022	11.392	8.53645	9.93751	8.56804	10.0717	8.66984	8.76523	9.32779	9.30873	8.79747	10.5486	9.29283	10.0572	9.63103	8.3776	9.97003	9.00798	9.64864	9.11286	8.64934	8.20714	9.17982	8.89231	10.1385	10.4202	9.15937	9.51878	8.88571	9.68869	9.28228	8.53346	8.78721	8.44765	8.66088	8.70083	8.89206	7.64345	8.49052	8.33162	9.17517	10.9663	10.4888	10.2183	11.3061	9.32089	10.4532
MRPL15	9.37053	10.2666	9.63096	10.1085	9.09899	9.60992	9.36026	10.6375	9.78791	9.72557	9.93282	10.5487	8.8701	9.7003	9.70999	9.8512	9.51594	9.35329	10.1999	8.9216	8.4391	9.2585	8.89924	9.63784	10.1263	9.26832	9.13502	10.8554	9.86426	10.4423	8.64486	10.3358	9.79967	8.35882	10.639	9.15762	9.27438	9.40761	8.29886	8.63609	8.64227	8.47578	10.3667	9.94048	11.5216	10.7167	9.98124	10.7208	11.1441
GIT1	7.83473	7.60678	7.52505	8.29891	7.64735	7.82226	7.57833	7.84507	7.99613	7.77117	7.89891	7.80123	7.63182	7.62974	7.6374	7.70995	7.88399	7.85316	7.621	7.86718	7.94879	7.43602	7.5742	7.89767	7.70827	7.79078	7.84507	7.453	7.79269	7.56091	7.6994	7.82967	7.94338	7.73855	7.74314	7.38893	7.4352	7.40789	7.5739	7.78121	7.86367	7.65253	8.24896	7.97588	7.68759	7.88113	7.58673	7.70995	7.68778
SNN	8.47149	9.33769	8.33244	8.33441	8.32156	7.79195	7.67546	8.66395	7.86471	9.87466	8.49859	8.44335	7.65921	9.52301	8.32567	10.051	9.01071	8.24791	8.921	8.05511	8.15393	8.36346	8.10884	8.31044	7.97481	7.9719	9.96826	7.99244	7.87974	8.03228	8.17299	8.53128	8.55574	8.38443	8.64967	7.14556	7.76291	8.07074	8.17065	7.61948	8.77306	8.35618	9.71519	9.18953	8.15205	8.37497	11.0795	9.19237	9.09933
FIS1	9.46606	10.113	9.62658	10.2323	8.84553	9.49409	9.74999	10.4144	9.37541	9.22699	9.07065	9.12197	10.3329	9.80633	9.47329	10.0677	9.03279	8.62152	9.4899	8.69385	8.94699	8.87291	8.5794	10.1439	9.17446	9.95079	9.77685	9.38337	10.0684	8.81848	8.2962	10.432	9.86341	8.84237	8.80359	9.00955	9.52838	8.95534	8.62789	8.40037	7.47996	8.05798	11.3923	10.4159	10.9006	10.9795	9.48117	10.8001	11.1688
RBM47	9.92759	10.0784	8.05593	9.38548	8.88247	9.11382	9.93378	8.85129	9.32929	9.10577	8.87562	8.86366	9.20944	10.0985	8.49051	9.19146	9.15958	8.00667	10.1316	8.51119	8.93259	8.1868	8.4882	8.36212	9.15039	9.86346	8.66062	8.84762	9.98672	9.50161	9.11113	8.85139	8.46279	7.85361	8.34811	7.90137	8.87087	6.34703	8.95846	8.19955	7.39789	7.91112	10.2379	9.54482	10.1058	10.2834	10.4774	9.82452	9.81219
NUSAP1	10.1525	10.744	9.03498	8.93164	11.506	10.5329	11.1044	10.7312	9.86274	10.52	10.4095	9.34425	8.30725	10.7418	9.35895	10.8022	10.0702	10.0495	10.383	9.61682	8.86665	8.62081	10.5802	9.35591	10.6247	10.608	11.4153	10.0784	8.54339	10.1034	10.9893	8.93207	10.1729	8.74771	9.93073	9.586	10.3584	9.75437	10.2887	9.62068	10.4447	9.44532	10.821	11.112	11.2653	11.536	12.214	11.2845	10.9418
PRPF38B	7.48942	7.18928	6.4687	7.44621	7.21747	7.42959	7.06047	7.22658	6.96233	7.53285	6.92464	6.85023	7.16125	7.05992	7.01067	7.66812	7.11566	6.53217	7.24291	6.717	6.4257	6.69512	6.3557	6.68661	6.91441	6.88278	7.00834	7.04841	7.34466	6.94505	6.97518	7.61478	6.78684	6.25931	6.55705	6.07518	6.948	6.61895	6.92417	6.9649	6.71801	6.47398	8.21941	7.21133	8.1321	7.69039	7.83415	7.24977	7.52669
COPS4	8.54566	9.3683	9.16286	8.92574	8.34391	9.25205	8.02618	9.27382	7.6207	8.3684	8.9188	7.91164	8.71686	9.70172	8.3897	9.01058	8.40203	7.5978	9.01214	7.71859	7.63232	9.33087	8.01912	7.91387	8.16369	9.08097	9.27298	8.89388	9.0957	8.14978	8.69079	9.12173	9.20259	7.82023	8.00997	8.38503	8.66097	8.29928	8.24174	6.80714	7.88029	7.21286	9.15091	9.25562	10.5142	10.2414	9.78534	9.77591	9.70772
AZI2	7.22322	7.59835	7.08193	8.33707	7.52076	7.90874	7.36961	7.37798	7.7144	7.25019	8.21735	7.29044	8.51401	7.01977	8.07312	7.46238	7.10459	6.96695	6.73702	7.04659	7.23123	7.11271	7.22214	7.70001	7.2042	8.02834	7.48215	7.18508	7.57042	7.0369	7.58067	8.17419	6.85425	6.95019	6.91798	7.14647	7.75738	7.73674	7.46777	6.99207	7.33899	6.76553	7.44855	7.24889	8.19164	8.61299	7.63331	7.16104	8.34753
PTMS	5.22414	5.03666	5.30054	4.90252	5.62819	5.23352	5.0753	5.59901	5.45123	5.45037	5.36365	5.47253	5.16825	5.31914	5.36157	5.80403	5.49793	5.52448	5.16046	5.31552	5.49995	5.22691	5.41901	5.91761	5.56774	5.06593	5.85641	4.90187	4.79279	5.30645	5.32298	4.85478	4.74438	5.98557	6.39627	5.40014	4.83159	5.03239	6.13414	5.20381	6.13923	5.56114	6.431	6.24208	5.99614	6.39961	7.04452	5.44617	6.29539
MRPS16	8.75665	8.7678	8.64993	8.57233	7.60026	8.51718	9.06929	8.16442	8.08707	8.85435	8.27274	7.7846	8.1924	8.67826	8.95046	8.25586	8.78433	8.44395	8.51061	8.01136	8.04848	7.9431	8.22654	8.10964	8.87172	8.70002	8.97633	8.92602	8.62171	9.11714	8.27197	8.02301	8.8097	8.28394	8.06414	8.31439	7.86264	7.79776	8.44457	7.64285	8.19206	8.09621	9.48139	9.17904	9.29138	9.98539	10.5274	9.07582	10.0668
OSBPL9	9.78742	9.35151	9.34381	10.7558	9.0167	9.9118	9.96081	9.64414	9.54818	10.3412	9.76606	9.38615	8.63587	10.555	9.69192	9.96097	9.30891	9.08285	10.0717	9.42811	9.47087	8.96357	8.73954	9.29362	9.23097	9.99049	9.94417	10.076	9.60868	9.19152	9.17093	11.582	9.97018	8.89115	9.87033	7.95987	9.1298	9.13667	10.0284	8.9605	8.78348	8.60933	10.8252	10.2266	10.7252	10.6439	10.3154	10.6715	10.8756
COMMD3	9.7828	9.65908	10.0633	10.0146	9.33292	10.1841	9.53647	10.0612	9.64646	9.1017	10.2008	9.69736	9.98034	10.2266	9.55009	9.40749	9.92856	9.95965	9.51733	10.0549	9.67557	10.0511	9.55024	8.87984	9.97829	10.0969	9.99554	10.0067	9.9085	9.74937	9.32106	10.1314	10.0961	10.2026	9.6413	9.48709	10.4796	10.0183	9.69779	9.54187	10.1394	10.2929	10.1356	10.4927	10.3962	10.7469	9.89167	9.6165	11.4534
MRPL13	8.55354	8.76486	7.66957	8.0533	7.38979	9.2598	8.4448	8.47914	8.22727	8.79701	7.71415	7.89574	7.09839	8.98843	7.76598	8.26052	8.00413	6.73826	8.52979	7.85254	7.49728	7.23352	8.15735	7.24837	7.88515	8.36803	7.58009	9.20105	8.61083	8.04401	7.52831	8.40257	6.87126	6.09876	5.25599	7.51841	7.57259	7.00322	6.97583	5.48442	7.02371	6.68064	8.84503	8.74479	10.0675	9.77035	9.3595	8.98991	10.709
UFM1	10.3009	9.37561	8.21346	9.47833	9.48971	8.82103	9.71337	8.38493	9.60065	10.8812	8.86033	9.50922	10.4728	9.53865	10.3395	9.86134	8.47103	8.33823	9.88185	9.45622	8.53662	8.79104	8.7613	9.21638	8.20034	9.8	9.30679	8.31732	10.4831	8.40483	8.38631	10.3785	8.99545	8.32359	8.99888	8.75983	9.83987	8.74073	8.66389	9.66115	8.74887	8.69136	11.0607	9.37727	9.69012	9.69058	9.50106	10.1236	10.2411
NT5DC2	6.91416	6.31347	6.13558	6.35841	6.56273	6.5321	6.57316	6.66458	4.58071	6.687	7.70753	6.21165	7.03044	6.50621	5.64537	7.77885	6.46814	5.54382	5.66986	6.56689	6.3393	6.85822	7.40692	7.40973	6.07961	6.97641	7.42357	7.5728	6.66741	6.52167	5.92965	5.55423	6.07075	6.25509	6.42605	5.00206	6.46806	6.12863	5.94127	6.96127	6.2945	5.57991	8.16421	7.84663	7.65477	7.91517	8.74606	7.86314	8.69323
ATP13A1	7.43662	7.25512	7.30943	8.17248	7.57116	7.40753	7.67279	7.5855	8.09494	7.48279	8.15776	8.22551	7.23322	7.99265	7.47131	7.63534	7.18572	7.47996	8.16024	8.33465	7.83904	7.34743	7.6902	7.33621	8.16073	8.17999	7.84112	7.60668	7.52441	7.61808	7.47216	7.53152	7.54805	7.47812	8.73364	6.85641	7.34921	7.28786	7.78096	8.15172	7.06166	7.73478	8.69655	9.01499	8.77725	8.34898	8.62118	8.72133	8.80688
PRPF40A	10.3182	10.6833	9.132	10.8962	10.2395	10.2746	11.0401	9.84055	9.32422	10.939	10.1461	10.2165	10.2963	10.9416	9.98707	10.6581	9.65576	9.56931	11.0751	10.1079	9.30026	9.40581	9.29948	9.50251	10.2034	10.4837	10.4357	10.9039	10.7407	9.77355	9.81955	11.3368	10.3454	9.08891	10.0642	9.14719	10.2578	9.42852	9.94558	9.83636	9.55241	9.09693	11.0716	10.7455	11.3512	11.0208	11.2597	11.1408	11.4689
WDR41	8.23801	6.87617	7.3792	7.74096	6.40198	8.04797	7.66371	7.51085	6.48043	8.69176	7.50502	7.95289	7.19545	5.91999	8.33287	7.96681	7.73207	6.85984	8.16843	7.8395	7.22482	7.65054	7.31702	8.21745	6.2769	7.83768	8.34915	6.89642	7.60903	6.87829	6.39961	7.51044	6.92674	6.76486	6.7283	5.70436	7.46031	7.49688	6.79803	6.90914	6.91843	6.68357	9.28033	7.30549	8.23246	7.28953	9.22926	8.5805	8.1929
BFAR	7.51837	7.7176	7.6211	8.73123	7.57582	7.29335	6.70783	7.82077	7.64528	8.10096	7.5929	7.01873	7.14031	7.47841	7.5325	7.30612	7.64721	7.03594	7.42365	6.77955	7.41941	7.60546	6.9051	6.59165	7.21116	7.58942	7.66951	7.08072	7.75205	6.57514	7.43248	6.99377	7.56568	6.73713	7.20937	7.19461	6.86464	7.42601	6.44671	6.57948	7.48279	7.21242	8.86879	8.1713	8.23212	7.67326	10.0219	8.4592	8.77219
ZNF706	9.57934	10.3356	9.45086	9.25829	9.66794	10.7539	9.87062	10.2079	9.23833	10.3087	8.54361	9.52039	9.25493	10.7774	9.28948	9.77478	9.43473	9.33363	9.71708	8.96165	9.81002	9.14495	9.04833	9.4408	9.60949	9.3929	9.65692	10.4133	9.98007	10.034	8.57208	9.96464	9.3382	8.26079	8.09371	8.4953	9.45012	9.4126	8.98328	8.80646	8.53524	8.88437	10.1213	10.4404	10.5814	10.9453	11.2548	10.5726	11.8865
USB1	6.87442	7.36742	6.721	6.77135	7.11338	6.56652	7.40049	7.0238	7.36609	7.13027	7.00604	7.26853	7.00563	7.20452	7.17514	7.01557	6.67695	7.33291	6.90946	7.08085	7.02891	7.47509	7.01782	6.74028	7.49833	7.18352	6.99914	7.42154	7.32832	7.02002	7.18883	7.34814	7.27997	6.80751	7.05378	6.89451	6.98576	7.048	7.16298	7.21259	6.59998	7.02835	7.40802	7.59645	6.64345	7.4128	8.138	7.40158	7.62413
MEA1	9.85947	8.98151	9.78464	10.5517	9.1509	9.44028	9.82977	10.6248	9.12667	10.8744	9.42658	9.79082	9.12292	10.4839	10.0335	10.7515	9.8311	8.8319	10.1961	9.88099	9.17643	9.92647	9.62068	8.37203	10.1574	10.0487	12.4046	9.86841	8.54462	9.60541	9.2709	10.6599	10.2262	9.5659	9.25617	9.40406	9.74874	9.25853	9.46936	9.10726	8.7811	8.72405	9.56649	11.0768	10.3999	10.4078	11.0129	10.5342	11.193
AKAP8L	6.07275	6.60318	6.44142	7.18653	6.67232	5.91982	6.10806	6.59469	6.67418	6.72234	6.9266	6.62266	6.14127	6.64915	6.35874	6.66487	6.30911	6.18796	7.16372	7.18129	6.09926	6.28306	6.2526	7.18768	7.27598	6.67071	7.361	6.66357	6.67071	6.55412	6.43056	6.00634	6.42803	6.31294	7.26547	6.16839	6.651	6.0282	7.03915	7.67658	6.60399	5.88744	7.48563	7.48605	8.29865	6.34789	8.00472	8.10461	7.08555
TMEM9B	10.5584	10.4732	9.54851	10.7965	10.1444	10.3341	10.3283	10.6744	10.1575	10.4236	9.42734	10.1182	10.2218	10.5753	10.5348	9.93969	9.6169	9.9621	11.1116	9.6693	9.72748	9.79033	9.27968	9.85849	10.0048	10.0767	9.20311	10.6703	10.7102	9.21189	10.0187	10.7706	10.0224	9.23716	9.61975	9.17172	10.5539	9.48622	9.36501	9.25293	8.84198	9.28391	11.7437	10.6583	11.0414	10.7796	10.6577	11.2264	11.0171
SLC12A7	11.0346	10.4972	9.99581	11.1283	10.2149	10.4219	10.5312	10.0856	10.4384	9.76065	10.1589	10.2291	10.5997	10.7692	10.7625	10.1416	10.5012	10.1071	10.3953	10.2682	10.132	10.3974	10.3056	10.1434	9.91204	10.5402	10.2748	10.2265	11.3243	9.91464	10.8553	11.6909	9.67706	10.2508	9.58228	9.59741	10.2767	9.77226	9.71376	10.0642	9.42776	9.68058	10.3386	10.9574	11.1462	11.1328	10.6423	11.3715	10.5445
ARGLU1	9.16131	9.91651	9.29308	10.4812	10.1449	10.0577	11.2964	10.3366	9.5658	11.5028	10.2281	10.262	11.0869	10.8753	10.3391	10.9083	9.48834	10.2534	10.68	10.7701	9.94438	9.55126	10.0367	11.011	8.84228	10.937	10.9996	10.0173	12.2197	10.3606	9.55241	12.0305	10.693	9.24153	9.538	9.93932	11.2355	10.512	9.42591	10.6595	10.1917	10.3151	11.6052	9.95865	10.8986	10.9554	11.0208	11.1136	10.8735
ZNF672	8.38335	8.22696	8.097	7.40578	7.4635	8.2617	7.8502	7.65316	7.98567	7.52464	7.97264	7.83249	7.83681	7.95524	8.18764	8.0984	8.08266	7.67932	7.81739	8.09665	7.65731	7.65408	7.05295	7.58263	7.41879	7.11763	7.66285	7.82159	8.59003	7.49827	7.87599	7.56304	7.59413	7.49022	7.45064	7.21485	8.61659	7.47937	7.93084	8.05296	7.88866	7.90131	8.88292	8.74114	8.12644	8.89117	7.88047	7.71502	8.72959
DCTPP1	9.73405	10.3278	9.81674	11.3187	10.0268	10.3246	9.91525	10.4454	9.75769	10.331	10.1917	9.77883	9.87299	10.2844	9.58152	10.1159	10.103	9.50522	10.135	9.71275	9.59695	10.1866	9.54747	8.95564	9.52648	9.91162	10.3532	10.47	10.7592	9.87953	10.225	9.45929	10.4545	9.39693	9.46555	9.93584	9.3273	9.83217	9.56187	9.4122	9.28184	8.9467	11.2361	10.2881	10.9584	10.5279	10.048	10.7917	11.661
GMPPA	6.55788	6.98247	6.5655	7.38174	6.58345	6.59803	6.37437	6.98597	6.81233	5.88585	6.21854	6.62652	6.4891	6.51293	6.9334	6.39357	6.52106	6.75513	6.58656	7.13275	6.39838	6.26332	6.997	6.80622	6.44622	6.72462	6.60794	6.47337	6.76896	6.98188	5.92455	6.0112	6.68244	5.79983	7.17586	6.25208	6.55263	6.73537	6.92061	7.04486	6.68707	6.04227	7.39711	7.75465	7.63313	7.43615	7.46531	7.38072	7.96155
MKRN2	8.32597	7.98213	6.59099	7.81892	7.65061	7.77854	8.38093	8.15602	8.07888	8.39743	8.27421	8.01377	8.49656	8.12139	8.01113	7.89815	7.55239	7.92937	7.70129	7.84743	7.93584	7.93973	7.73279	8.45093	8.0745	9.24486	7.88751	8.15797	8.09845	8.48155	7.35378	8.29205	7.91747	7.73714	8.11719	7.50791	7.96963	7.32432	7.67316	7.72073	7.27739	7.33012	9.39116	8.31814	8.69401	9.23086	9.1091	9.25873	9.49747
COMMD9	8.34441	7.78801	8.17277	9.1724	7.59758	8.61569	7.71592	8.40063	7.9517	8.22535	7.57985	7.35729	8.0461	8.31375	8.20168	7.96312	7.86244	8.24021	8.46522	8.49531	8.11158	8.70009	8.26539	7.99523	8.25869	8.47565	8.3208	8.29374	7.92587	8.20978	8.4112	7.68051	8.57275	7.94441	8.42639	8.16308	8.42079	8.2729	8.31918	7.98287	8.32277	7.89717	8.84605	8.69551	9.00225	8.67517	8.95482	9.71263	9.84571
FAM96B	8.50972	9.32915	8.30246	8.79323	8.96955	8.01781	8.31163	8.96015	8.52889	8.6346	8.65871	8.86883	8.58702	8.89961	7.85044	9.19754	8.86098	8.21202	9.1703	8.70896	7.94368	8.86592	8.18751	8.42728	8.9759	8.29311	9.0101	10.0355	8.50925	9.06427	7.841	9.06039	8.30878	7.57269	8.54167	8.24626	8.32167	8.36782	8.61677	8.12037	8.37675	7.8792	9.57961	10.0247	9.45503	9.14739	10.7674	9.92566	11.2667
AAAS	7.26795	6.80722	7.18675	7.19291	7.32721	7.12702	6.95249	7.37326	7.35552	7.02864	7.3819	7.30069	7.14567	7.16659	7.2081	7.36459	7.20351	7.03411	7.55739	7.2431	7.02366	7.05927	7.18906	8.08692	7.62064	6.94235	7.97719	7.28616	7.13123	7.14622	7.14324	7.04191	7.36067	7.58181	7.53416	6.70529	6.89468	7.01266	7.87562	7.54853	7.09949	7.21419	8.10181	8.24479	7.73688	7.7927	8.07521	7.75264	7.61809
ARHGAP17	8.13046	7.30373	7.10142	7.77484	7.28727	7.48606	7.42588	7.17105	7.1862	7.81135	7.20393	7.52513	7.27819	7.53245	7.29537	7.24821	7.11451	7.23486	7.54529	7.35578	7.2156	7.00424	7.23116	7.33072	7.34706	7.38792	7.54809	7.47729	7.72845	7.21252	7.22146	7.39688	7.55364	7.16397	7.44327	7.32088	7.33189	7.45976	7.2203	7.76559	7.23184	7.26447	7.54867	7.62905	7.92875	7.63782	7.71433	7.76789	7.90008
ZDHHC3	7.825	7.39292	6.90799	7.99244	7.70544	7.85318	7.98575	7.78084	6.66357	8.08181	8.29923	7.17256	7.78476	7.78327	7.5333	8.3408	7.39757	7.28054	6.93202	7.11299	7.50858	7.2247	7.9565	7.32433	7.50185	7.9593	7.81703	7.61034	8.15646	7.30723	6.95513	7.05618	7.20924	7.65613	7.11526	6.99634	7.80766	7.24599	7.71022	7.49503	7.04467	6.84642	9.14777	8.30985	7.48153	8.50092	8.64553	7.77859	8.60501
GGNBP2	8.50131	8.89527	7.94643	8.87658	8.63176	8.61731	8.83466	8.83762	9.04382	9.55584	8.81656	8.08722	8.62096	9.47065	9.31453	9.4012	9.20681	8.21621	9.30689	8.43635	8.50072	8.3822	7.94898	7.86936	8.77964	8.68244	8.69415	8.92077	8.96485	9.44167	8.17536	9.21057	9.64162	8.24629	8.25871	8.13098	8.38165	8.27352	8.37374	7.5489	7.8568	8.66181	9.54828	9.74621	9.41792	9.45514	10.2916	9.76049	9.78357
C20orf27	8.14922	7.94562	8.33082	8.42142	7.96188	7.78519	7.44362	8.1358	7.97761	8.04526	7.78502	8.12956	7.84765	7.83411	7.57753	7.93888	7.97064	7.56114	7.52526	8.1256	7.89013	7.6757	7.84014	7.55358	7.50175	7.1686	8.40963	7.91801	8.08003	7.59416	7.42394	7.87444	7.97431	8.17155	7.75421	7.39205	7.60351	7.55173	7.52065	7.5717	7.55916	7.59095	9.48202	8.14554	8.69196	8.08552	8.1221	8.69147	8.93723
UBP1	9.65448	9.44125	8.43258	10.2621	9.40413	9.92001	9.96517	9.83733	9.88522	10.5995	10.0071	9.51233	9.53569	9.03848	9.05932	10.0174	8.59179	9.12992	8.80282	9.46763	8.70482	9.52024	9.32522	9.12916	9.39083	10.3326	9.70198	10.4053	10.745	9.92663	8.84717	10.1565	9.30252	8.39455	8.84773	8.43795	9.94588	9.4864	9.31467	9.27907	8.5673	8.29483	11.1336	9.91203	10.4093	10.8515	11.2936	10.4827	11.3054
PTGES2	7.69123	7.53337	7.11665	7.60559	7.589	7.11876	7.40661	7.65767	7.37122	8.00039	7.45189	7.42398	7.44068	7.79165	7.44629	7.56955	7.17807	7.27806	7.59141	7.39886	7.49321	7.47569	7.05658	7.29359	7.75823	7.79352	7.25255	7.54966	8.17119	7.77141	8.04841	7.20659	7.48837	7.97056	7.36326	7.16117	8.28084	6.83838	7.33485	7.6445	7.34834	7.23649	8.54579	8.61195	8.1689	8.39001	8.8069	9.61695	8.82524
FXYD5	7.51374	7.50507	8.39705	6.97589	7.36594	7.47512	8.87622	7.07255	7.24521	6.99514	7.11538	7.64669	8.27765	7.34088	7.37425	7.69334	7.22396	7.60365	7.07845	7.9268	7.5677	7.35302	7.69799	7.83909	7.50071	7.68568	7.28211	7.20254	8.05315	7.16856	7.55681	7.88303	7.25564	8.14835	7.7354	7.77135	6.81107	8.05727	6.86246	7.36231	7.53839	7.60479	9.27311	9.26257	8.0017	8.68919	7.11473	6.81507	9.20332
CHMP5	11.459	11.3298	9.76631	11.3588	11.0532	11.2439	11.7131	11.0889	10.7647	12.3185	11.2706	10.7008	11.2937	11.961	10.8935	11.2881	10.0654	9.4647	11.4794	9.97123	9.59983	9.70294	9.70935	9.73651	11.15	11.2213	10.5253	11.6313	12.5271	10.4343	10.1406	11.989	10.4608	9.50109	10.272	9.59539	11.317	10.1533	10.0296	10.4778	9.7343	9.74014	11.7728	10.952	11.811	11.3018	11.7419	11.2913	11.2172
NPDC1	6.69575	6.37451	5.40475	5.98851	6.65091	5.72884	5.96757	5.58801	5.52537	6.04021	6.07476	5.97919	7.51114	5.50101	5.7507	5.3028	5.89731	6.92044	6.77716	5.11331	6.25836	5.88839	6.09367	6.62959	5.24107	5.49998	5.40609	6.40986	7.70219	5.47917	5.3891	5.84115	5.46757	5.62187	6.37851	6.04303	6.42803	6.60202	5.74294	7.76854	5.36724	5.57826	7.73017	7.16384	6.18933	8.48045	7.81494	7.3054	8.20197
AAR2	8.31919	8.01203	8.09512	8.62436	8.02015	8.51099	8.04209	8.49525	8.54732	8.42036	8.80029	8.48315	8.57717	8.40999	8.02199	8.78914	8.33919	8.00711	8.52921	8.28194	8.05574	8.54473	8.68682	8.25885	8.32238	8.31642	9.02727	8.85788	8.4059	8.45623	8.27471	7.87395	8.16113	8.36597	8.25853	8.0494	8.08344	8.23582	8.0993	7.91125	7.77234	8.26681	8.96012	9.21031	9.33508	8.94206	9.40896	8.86686	9.35362
WDR11	9.08332	9.43745	7.87261	9.76253	7.83431	9.23437	9.02938	7.55035	8.22679	9.51551	8.71718	8.39969	9.0752	9.30231	9.08297	9.62316	8.48635	8.14558	12.4922	7.81974	8.69745	7.54897	8.36708	8.5765	8.42678	8.55849	9.22261	9.54024	8.43433	9.25282	7.70723	9.83223	9.01058	7.55908	8.76855	7.98765	7.89306	8.2962	8.8043	8.02421	8.21776	8.08261	10.0826	9.63056	10.086	9.52677	9.65133	9.31074	9.28985
AGFG1	8.82717	8.3717	8.74004	9.59651	9.09231	9.30785	9.31688	9.13746	9.15699	9.57975	9.36366	9.77558	9.55753	9.31962	9.4432	9.4911	9.0383	9.42413	9.32387	8.99048	9.47235	8.45454	8.78112	8.73888	8.82591	9.13382	9.0915	9.28717	9.39781	8.90287	8.21579	10.241	9.31031	8.51288	9.46904	8.89862	8.6824	8.97598	9.41874	9.2066	9.26764	8.5324	9.73467	9.31962	9.55614	9.85946	9.4751	9.82606	8.78694
TMEM165	10.4223	10.0067	9.83056	10.8146	10.4883	10.1342	10.1528	9.84558	9.80119	10.6603	10.5744	9.01014	9.469	10.1535	10.1228	9.71218	9.17443	9.47839	10.9584	9.00352	8.9801	8.94276	8.97848	8.39537	9.6046	10.6688	9.44116	10.634	11.126	10.3423	9.15096	11.1905	9.84314	8.65356	9.1685	9.15738	10.1081	10.0056	9.27512	9.42142	8.70071	8.53242	10.2588	10.0958	10.803	11.4478	11.1394	10.3362	11.407
AGPAT5	9.20232	8.846	7.72874	8.56457	7.45708	8.77757	9.51331	7.85498	8.50334	10.943	9.38522	9.19403	8.80552	9.00311	8.38923	9.94062	8.59073	7.54061	9.56672	8.76028	7.73729	8.36018	8.87701	8.04112	7.73659	9.12073	8.64023	7.45916	9.15769	7.07918	8.30258	8.68115	7.97095	7.20415	7.78461	7.15735	8.40968	7.67142	9.17831	7.46473	8.84216	7.6835	10.4781	8.11575	9.74019	9.88222	9.96562	9.04306	9.848
CUEDC2	9.85651	8.77042	9.57462	10.5211	7.76964	9.57025	8.72577	9.51115	8.93388	8.73691	9.00483	8.97335	9.23449	9.20075	8.68797	10.0353	9.33572	8.80272	8.46552	8.88142	8.50654	8.70492	9.21959	9.48118	9.41382	8.49629	9.67785	9.41609	9.49071	8.61546	8.39774	8.44831	9.21659	8.67452	8.95838	8.20628	8.93093	9.13669	9.54027	8.30969	8.97863	9.0862	10.4314	10.1707	9.54621	9.31788	9.11293	9.18606	9.83253
ARFGEF2	8.25144	8.03769	7.38669	8.68858	8.73842	8.39375	8.56177	8.40194	9.13306	9.75179	8.85444	8.99531	8.44104	8.49557	8.99405	8.81856	9.11929	8.01529	8.92313	8.59685	8.59863	8.34649	7.51181	8.35643	8.51829	8.77802	8.40876	8.25736	9.54226	8.34873	7.84199	9.0531	8.03468	7.27176	8.23092	6.78395	7.83642	7.12679	7.83472	7.69697	8.42477	7.44079	9.07114	9.33329	9.46305	9.98846	10.2908	10.0683	9.70797
TEX2	8.15575	7.95714	7.11767	9.26173	7.28807	8.46939	7.92953	7.9475	7.30124	8.84972	7.82899	8.2896	7.35786	8.97074	8.28604	8.30919	8.07315	7.60232	8.52155	7.3172	7.96402	7.77178	6.85633	7.16118	7.54814	8.86994	7.64495	8.53397	8.25712	7.22126	7.71327	7.57948	8.16494	7.62546	7.0878	7.37698	7.29972	7.38283	8.37561	7.8229	6.93127	7.53723	7.73439	8.59366	9.5289	9.95609	9.60158	9.23943	9.12397
IFT57	10.7635	10.0109	10.2032	11.0626	8.8304	9.49418	9.82662	9.61849	9.66697	10.4886	10.3948	9.43137	10.3672	9.81122	9.49819	10.0884	9.31922	9.06249	11.1625	9.45116	8.46255	9.077	10.6018	9.18469	9.06164	9.70936	10.4821	10.3379	9.18587	9.46227	8.83142	9.65454	9.76219	8.4228	9.16719	7.99522	8.95634	8.76456	9.03224	8.91695	8.3249	8.9021	10.5642	11.1851	12.179	10.3975	11.3024	11.1664	11.6567
DERA	9.89727	9.147	9.91689	8.93253	9.49437	9.2528	10.435	8.74985	9.3595	8.93176	9.84237	8.72804	8.37819	9.69963	9.50712	9.97726	9.17592	9.41424	9.61691	9.3211	8.31336	9.0361	8.47392	7.79859	9.71959	10.9346	9.70098	9.93536	9.12751	10.2736	8.60221	8.24858	8.6598	9.70788	9.34578	8.67528	8.75173	7.92718	9.31177	8.10006	8.33972	8.56016	10.1899	10.5417	10.0655	9.4503	10.1219	9.83247	10.4559
FTSJ3	8.83953	8.46775	7.97797	10.2229	7.707	8.70641	8.89819	8.99414	8.01243	8.48507	8.35216	8.57938	8.63415	9.18955	8.43649	9.17391	8.22824	7.68764	8.8816	8.09621	8.37163	8.34916	7.70048	8.38915	8.46989	8.98532	9.93632	8.7907	8.42681	7.94167	8.72368	8.10254	9.11734	8.27426	8.06349	8.18587	8.51088	8.13035	8.60823	8.20315	7.98175	8.19789	8.61839	9.24425	9.57687	9.49631	9.378	8.77712	9.49965
TEX10	9.00995	8.33912	7.99249	9.00533	8.93767	8.59246	8.56067	8.7463	9.24433	9.57174	9.46435	8.50285	8.9611	9.05725	8.66544	9.87118	8.22395	8.12563	9.19453	8.44434	8.78676	8.66994	8.32253	8.76958	8.77606	8.90983	9.41843	9.11228	9.08629	8.60869	7.30012	9.22675	8.85642	8.11435	8.77721	8.18372	9.11737	8.23926	8.96082	7.67103	7.98604	8.18446	9.44121	9.25834	9.32572	8.8702	9.70849	9.63388	10.4109
MRPL4	6.90363	7.1286	7.39198	10.0903	7.65097	7.51096	7.17304	7.29819	7.88022	7.2749	7.64531	6.83335	7.23457	7.53335	6.80365	7.40109	6.78883	6.44207	6.97954	8.06292	7.40059	7.47641	7.24264	6.43716	7.24827	7.04733	7.47185	7.30475	7.39625	7.94434	7.59144	7.00301	7.65812	7.48566	8.04565	7.15726	7.17924	6.98977	7.2579	7.04139	6.31268	6.67858	8.76091	8.52804	8.45049	7.94422	8.32661	9.14146	8.84473
MRPS10	8.3017	7.58108	7.8407	8.23111	8.2877	7.93434	8.83251	8.65498	7.63464	8.90293	7.67236	9.02456	7.62963	8.8152	8.75483	9.15481	8.04238	7.61265	9.27746	8.03161	7.57523	8.30654	7.71707	6.90647	8.33369	8.68434	11.0083	8.89475	7.54683	7.6266	7.18761	8.74143	8.71663	7.85991	8.10812	7.2043	7.97038	7.83258	8.23536	7.53023	7.62493	7.26199	8.87265	9.43554	9.96554	8.96057	9.45435	9.70302	9.62405
WDR26	9.55488	9.33518	9.22619	8.94773	9.22919	9.541	9.22325	8.71143	9.0346	9.53572	9.12871	9.17435	9.31743	9.81709	9.59168	9.56524	9.14361	8.67539	10.0652	9.44933	8.66837	8.87583	8.27243	8.21982	8.73525	10.1464	9.31088	9.84968	9.29786	8.52553	8.89748	9.33437	9.44091	8.71991	8.55264	8.4722	9.30829	8.95357	8.53415	8.99388	8.69971	8.7476	9.82216	10.1575	10.8175	10.1325	10.8153	10.0594	10.7811
UBR7	8.5706	8.14764	6.65623	8.31375	8.29504	8.06633	9.54334	8.45589	7.65294	8.28049	7.16044	7.14624	7.59381	8.03702	7.56761	7.90008	8.65004	7.06684	8.53796	8.08088	7.66297	7.81235	7.4547	7.69708	7.46248	7.16027	7.92255	7.75889	7.35154	7.20401	7.87253	7.48919	6.97538	6.60248	7.80634	6.06009	7.88444	7.90107	6.94289	6.4382	7.60196	7.38117	8.93039	8.29611	8.26616	8.2266	9.42585	9.587	9.77295
MFSD1	9.46763	9.94795	9.12814	9.43773	9.75843	9.19551	9.6724	9.25636	9.36071	9.35659	8.95361	9.46788	9.71307	9.33571	9.33763	9.65265	9.00934	8.20096	9.35454	9.23357	9.51695	9.08853	8.47191	8.4687	9.29478	9.31021	8.77852	10.6653	10.9283	9.3125	9.18261	9.76223	9.33046	9.78683	8.75026	8.60664	9.54259	9.59593	8.4693	8.72153	8.95987	8.68697	10.6153	9.90036	11.2093	10.662	10.4587	11.2138	10.7747
XAB2	5.07471	4.69528	4.86865	4.99345	4.89727	4.76237	4.63531	4.85263	4.73734	4.37475	4.77339	4.75165	5.02657	4.49246	4.83965	5.01383	5.17967	4.68382	4.85868	4.69939	5.00043	4.69076	4.77245	4.74853	4.61478	4.40944	4.55086	4.63205	4.53661	4.52807	4.43191	4.96221	4.87436	4.85942	4.71819	4.52423	4.49922	4.40997	4.58748	4.6511	4.89089	4.84075	5.28556	4.99813	4.83727	4.87002	4.9126	5.03317	5.11144
CMAS	8.19136	6.86933	6.42252	6.31092	5.85876	7.31684	7.23059	8.73626	7.99671	7.25309	6.8393	7.10346	6.82688	6.77615	5.84096	7.71211	6.8201	5.8521	8.33438	6.96894	6.00867	5.31139	6.08774	6.61027	6.46043	7.72576	6.16447	6.28404	7.63912	5.43802	5.29495	5.64631	6.07957	6.34071	7.33572	4.49374	6.64216	5.78393	6.47167	5.14049	5.84839	5.7678	9.25789	8.18214	8.43051	6.66668	8.57304	7.72701	8.18895
MRPS34	8.33063	8.10453	7.87161	8.71364	7.49511	7.49194	6.77739	7.76128	7.76501	7.58737	6.93495	7.63217	7.19741	7.36999	7.27023	7.20316	7.56197	7.29218	7.87985	7.29614	7.28615	7.29691	6.87361	7.63275	7.31229	7.93874	7.63038	7.26547	7.91068	7.49972	6.73241	6.89668	7.74523	6.91965	7.28615	7.01055	7.07172	7.06663	7.44491	7.37841	6.58032	6.56164	8.95412	8.28072	8.31797	8.04874	8.3654	8.19135	8.58443
CEMIP2	6.38279	6.31049	6.64758	5.66683	5.80584	6.39089	7.34107	5.94365	5.7914	7.50968	5.97366	6.08287	5.93158	7.3336	7.83951	5.8154	6.51632	6.08274	5.6301	6.1097	6.9632	6.42817	6.53129	5.99633	7.28636	7.3701	5.8615	6.51315	6.48073	6.4289	6.81045	6.37908	5.97286	6.24618	6.59779	6.55072	7.95103	6.97821	6.02666	6.41778	6.89053	6.84396	7.32103	5.61649	5.79338	6.67093	6.27699	6.01412	6.36209
ASF1B	6.75831	7.51271	7.39653	7.04229	7.21652	7.06823	7.31095	7.65284	7.95018	7.2994	7.61265	6.97119	6.75595	7.72523	7.20831	7.36836	7.53119	7.19517	7.33243	8.02601	7.27815	7.46815	7.77263	7.08815	8.37254	7.68529	8.1681	7.36381	7.06393	7.49829	7.59456	6.87969	7.3021	7.14031	7.27622	7.35121	7.47464	7.43027	7.63596	7.0997	7.10236	7.2948	7.59795	8.44334	7.68788	6.88926	8.06851	8.83199	8.12655
C9orf78	8.09619	6.8605	6.50931	7.42435	7.96813	6.89652	7.96206	6.8568	6.99205	9.74126	7.42321	7.21009	7.80841	8.06705	7.71545	8.20577	7.19084	6.60417	8.08686	7.66924	7.37659	7.3737	6.65655	7.65369	7.27799	7.8819	7.1555	8.23691	8.78988	7.43514	7.82842	6.86762	6.75359	6.56077	6.89165	6.29259	7.73049	6.86553	7.01744	7.00945	6.36957	7.09631	7.88926	8.36578	7.99004	7.39691	7.74075	8.3105	8.72977
RBX1	10.1892	10.0571	9.44625	9.88463	10.5025	9.74008	9.47362	10.9625	9.87598	10.0059	9.75707	9.24406	9.63262	10.7659	9.52318	10.27	9.23928	10.2417	9.39771	9.37484	9.41261	9.14027	9.10059	9.19454	9.75933	9.83491	9.88248	10.1594	10.857	9.95734	8.68202	9.93872	9.60609	8.52317	9.06244	10.1187	9.6841	9.32678	9.63171	9.33258	8.8468	8.92603	10.1744	10.5894	10.7206	10.4322	10.7093	9.77153	10.7776
HMOX2	7.71144	8.15694	7.89126	8.31051	7.47614	7.21714	6.99041	7.45924	6.97879	7.46841	6.8897	7.85514	7.20606	7.00293	7.72441	7.17234	7.16666	6.90765	7.4362	7.31307	7.26035	7.37521	7.04612	7.40179	6.99919	7.84462	7.28907	7.41232	8.13665	7.44212	6.59759	7.1059	7.46206	6.36163	6.92956	6.8855	6.83338	7.43817	6.54921	6.95427	6.76728	6.57283	8.52991	8.04884	8.06836	7.75778	8.51519	7.55563	8.22295
CFAP298	9.84589	9.06045	8.27103	8.84465	7.93826	8.98735	9.01443	8.72427	8.65692	10.0136	8.85395	9.87324	10.2323	9.95879	8.92162	9.28254	9.2263	8.70788	10.1222	9.38259	8.66127	8.33424	8.19807	9.39414	9.08579	9.42513	9.49698	9.34054	8.4161	8.95235	8.05705	8.75455	8.72997	8.52587	9.35899	7.61692	9.21556	8.62398	8.45693	9.33387	7.89588	8.34741	9.78531	10.0221	11.0733	9.58842	9.93928	10.0868	10.4776
RETSAT	8.30565	7.86095	6.722	8.01723	7.45419	7.54176	8.73465	7.38804	6.88625	7.46252	6.20585	7.72249	7.74642	8.6701	7.55601	7.52389	7.29121	6.8812	7.15567	6.94009	7.14939	6.76722	6.90342	6.93376	7.60961	7.43761	6.54173	7.39316	7.39595	7.36389	6.75235	7.85867	7.66594	8.25977	6.88322	6.31159	7.1954	7.1207	7.30647	7.10242	6.07611	6.62023	8.32132	8.06508	8.75222	8.5061	8.86994	7.80192	7.32562
RMDN3	9.18333	8.50375	7.7881	7.83915	8.37851	8.66813	8.85588	8.06657	8.25695	7.73962	7.80438	8.01734	8.49325	7.79333	8.45837	8.05145	8.15311	8.35157	8.62656	7.98714	8.65583	7.62545	7.96232	8.23849	8.25412	8.1553	8.21817	7.70203	7.73577	8.58612	8.85983	7.46312	8.19108	7.81667	8.01925	8.23308	8.30654	7.84535	8.00499	8.03267	8.36762	7.59283	8.36963	8.44063	8.80814	9.32065	9.25257	9.2085	8.50004
NFYB	9.11473	8.07412	7.47127	8.13582	8.08118	8.72045	8.29201	7.36537	8.04127	8.97777	8.79023	8.10868	9.07886	8.04874	7.85515	9.62027	8.46676	7.80849	8.80506	7.04941	7.16799	8.04752	7.9766	8.64642	8.15407	8.55716	8.74658	8.38976	7.96805	7.28566	7.8757	8.16865	7.6777	7.15957	7.44454	7.29547	7.746	8.88913	8.88556	7.09865	7.81315	7.89132	10.5176	8.79053	9.02008	9.01118	9.37646	9.61346	9.36812
CYBC1	8.54788	8.0042	9.07051	9.32734	9.01267	8.84621	7.87455	9.12896	8.13156	7.50914	8.09935	8.71263	7.44727	9.38367	7.87758	8.21182	8.09178	7.90169	7.87629	7.59037	8.83515	8.29712	8.42692	7.77025	8.77997	9.94104	8.81702	8.87435	8.25252	8.12804	8.48147	8.58373	8.3989	7.17898	7.32118	8.2744	8.4301	8.21765	7.89874	8.2054	7.28186	7.93398	8.75392	9.90082	9.49375	9.79282	9.01209	9.98378	10.1575
GATAD2A	8.35885	8.06463	8.15569	8.49324	8.28162	8.23554	8.56312	8.2433	9.22768	9.17881	8.38408	9.0822	7.64068	8.80137	8.543	7.97911	8.13204	8.5633	8.40319	9.73937	8.6287	8.74826	8.55823	7.93054	8.82066	9.06817	8.65958	8.6528	8.30709	8.79558	7.84354	9.15799	8.05605	8.57473	8.99195	7.65781	8.56929	8.39017	9.20172	9.21192	7.9897	8.44181	9.19321	9.68747	9.19134	9.2224	9.14687	9.5577	9.03042
TSEN34	9.10029	9.24723	8.9216	9.81492	9.52632	9.02848	9.35737	9.37906	7.99009	9.30671	9.13617	8.40259	8.71843	9.54732	8.28929	9.39116	9.02565	8.24651	9.03933	9.06211	8.56416	8.74254	8.85433	8.31309	8.92747	8.85636	9.05784	10.4177	10.2544	8.75945	7.70937	9.12553	9.04505	8.69977	8.76471	8.26868	8.63891	8.57373	8.7957	8.46712	7.75473	7.32687	9.77349	9.129	10.6926	10.6301	10.1936	9.60864	10.9669
NIF3L1	8.78076	8.92381	8.12392	9.29207	9.35767	9.25733	9.24203	8.83525	8.8626	9.39021	8.52428	8.42253	8.80695	9.26973	8.7095	9.14839	8.34539	8.12878	9.38129	8.13973	7.91418	7.83898	8.10913	7.89171	8.85858	8.63374	8.88904	8.603	9.0173	9.2377	7.29964	8.40478	8.69314	7.84955	8.49907	7.39774	7.45496	7.91217	8.36205	7.86312	8.32658	7.67724	9.95898	9.24404	9.7368	9.45761	9.53722	9.61095	9.68419
RBM22	9.45826	9.46638	7.84538	10.0284	8.28199	9.34034	9.93855	9.6528	8.77435	9.50519	8.85395	9.27771	9.24641	8.85845	10.0737	9.63221	9.52823	8.61449	9.37853	8.44288	8.99925	8.63947	8.25079	9.49565	9.00823	9.49323	9.35885	9.75687	9.9154	9.24374	9.23996	10.0052	8.60086	8.47943	8.40369	8.68681	8.39494	8.99506	8.26034	7.55616	8.94117	8.44406	10.5432	10.3198	10.6668	10.4399	10.1415	10.0317	10.5775
SMAP1	8.7529	8.84541	9.02766	10.3328	9.35114	9.70943	8.97156	9.72208	9.69237	9.18318	9.91433	9.29243	7.89972	10.2358	9.4783	9.32761	9.14445	8.81791	9.30447	9.39709	8.40595	9.15602	9.11729	7.5272	9.44762	9.6854	8.58853	9.67491	8.56805	9.33575	9.37291	8.55624	8.8576	8.81425	8.8188	8.01487	8.72624	8.5427	8.22467	8.63066	8.4119	8.10939	8.63322	9.46838	10.3028	9.57486	10.997	11.1155	10.8456
AP5M1	8.97879	8.99931	8.07835	8.34673	9.70017	8.66488	9.44533	9.47541	8.34413	8.87755	9.1371	7.93779	8.00428	8.81094	8.51259	8.79872	8.51575	7.74435	8.55516	7.9753	7.97289	7.99664	8.44145	8.3774	7.51958	8.21254	8.81826	8.56697	8.92947	8.8924	8.61058	8.43956	8.09718	8.18807	8.31199	6.95474	8.67939	7.94913	8.16558	8.21076	8.1607	7.93479	10.6774	9.10681	10.6096	9.60354	9.72006	8.88163	9.35305
SRPRB	9.63487	9.73724	9.2909	9.77798	9.0047	9.29847	9.28061	9.398	8.57155	9.28475	8.46776	8.51836	9.28611	8.55721	9.13141	9.1062	8.5095	8.39742	10.0326	8.97508	8.01716	9.28244	8.50484	8.23655	9.10692	9.12961	9.14927	9.6712	9.00401	8.27754	8.86933	8.80208	9.16757	9.55368	8.6089	7.65741	8.68931	8.68613	7.8479	8.33196	8.07502	8.32775	10.0625	10.3428	11.1396	10.1555	10.5205	11.1025	10.5993
UBE2O	6.20629	6.65695	6.61877	6.68117	6.50377	6.44298	6.54237	6.4679	6.46146	6.52631	6.61769	6.69384	6.55689	6.71441	6.14696	6.61766	6.92918	6.67481	6.64394	6.66467	7.17152	6.85497	7.04392	6.60551	6.88687	6.88709	6.76534	6.61854	6.60627	6.86725	7.04286	5.95926	6.83803	6.77277	6.75297	7.06565	6.30616	6.30989	6.92278	6.89167	6.58789	6.47482	6.44269	6.75556	6.86694	6.78669	6.942	6.55949	6.99716
SCAMP2	9.20129	8.61779	8.7545	8.87081	8.80957	9.03478	9.13814	8.85776	8.71981	8.84127	9.04762	8.92662	8.83364	9.13483	8.96542	9.06712	8.67863	8.78163	9.19112	8.64722	8.85244	8.95313	8.78526	9.0022	8.99091	9.08742	9.06212	8.82131	8.99782	9.24157	8.988	9.00012	8.67664	9.31099	8.77232	8.80691	8.77051	8.86175	8.74837	9.69685	8.86585	8.77344	9.18355	9.57933	8.99076	10.052	10.2766	8.98513	8.66333
INF2	7.06222	6.39389	6.31826	6.877	7.13641	6.18764	7.55418	6.64862	5.78405	6.00985	5.86071	6.22135	6.73909	7.07788	6.46483	6.22549	6.86085	7.07757	7.13057	6.38394	6.70841	6.07365	6.42448	6.58719	6.76284	7.24781	6.11812	6.85343	6.90183	6.76245	7.19947	6.67475	6.66401	6.62164	6.60631	6.77779	7.60522	6.12399	6.38665	6.97528	6.43177	6.31482	7.62312	7.19337	6.68851	7.34132	7.34679	7.9887	7.89408
TRIB3	6.9247	7.83927	7.7691	6.75401	7.50144	6.84708	7.14475	9.45798	7.31589	6.32347	7.74099	7.49806	7.541	8.35521	8.62305	6.12306	8.46296	7.23189	6.7217	7.72215	7.46425	7.07217	8.01472	6.79721	7.65777	6.26545	7.95627	7.64819	6.26841	6.7417	6.86753	8.18316	7.3448	9.51566	6.95336	6.97253	6.6029	6.18268	6.21701	8.00502	6.52657	6.94526	8.21403	7.22831	7.87115	8.89137	9.2822	8.70057	7.5103
GLT8D1	10.2944	9.88612	9.45083	11.696	9.97885	10.0226	9.96231	9.73388	8.8465	10.4722	10.4105	9.61651	10.4796	9.8523	9.74581	9.94695	9.20009	9.64734	9.94944	9.5087	9.70986	9.70392	9.79711	10.5294	9.6192	10.4452	10.1722	10.696	10.2578	9.51286	9.42415	11.2439	10.0009	10.0623	9.76378	9.23649	9.97559	9.64998	9.63176	9.79191	9.55259	9.01019	10.2813	10.6642	10.9425	10.9555	11.0271	10.4414	11.2168
CENPT	4.91309	5.11973	4.73429	4.8511	4.96542	5.09633	4.96053	5.2277	4.83901	5.03485	5.31177	5.20004	5.42007	5.31893	4.63524	5.16526	5.13553	5.23402	5.54247	5.35559	4.69159	5.23196	5.37038	5.40738	5.40783	5.19215	5.01431	5.42199	5.07449	5.20097	5.01485	5.00789	5.14772	5.18931	5.47533	5.4112	5.17604	4.96321	4.9342	5.30734	4.74283	4.8511	5.64813	5.43835	5.40314	5.41316	5.54613	5.40639	6.16528
ZNF395	8.7726	7.65472	7.35105	7.83598	6.66915	6.7714	9.10394	7.671	7.28477	9.22973	8.25689	7.87606	8.71678	8.41703	6.80492	9.43573	7.78264	6.41576	8.70908	8.5421	7.17932	7.18232	7.43347	8.28942	6.99829	7.24793	7.76972	7.08526	8.17296	8.52713	8.08938	8.481	7.33859	6.00431	6.89261	6.72511	8.32505	7.68107	7.59579	6.90509	7.572	6.93711	10.4904	8.4325	8.56069	9.29566	8.64359	8.09969	9.77182
SLC52A2	8.84751	8.94847	8.54188	9.60802	8.15258	8.61357	9.14809	8.89298	8.79182	8.63645	8.06686	9.05857	8.22716	9.54295	8.68174	8.66756	8.71849	8.87291	8.94384	9.12569	8.06831	8.82643	8.78178	8.49282	9.03777	9.17683	9.09395	9.08334	9.79554	8.36948	8.36297	10.1569	8.36314	8.20234	7.91053	9.19329	9.05057	8.54072	8.52344	8.84171	8.16879	8.54543	9.37197	9.65554	9.43565	9.89336	9.78635	9.55631	10.2783
HMG20A	8.33968	7.68305	7.36056	7.13141	6.6471	8.44275	8.19938	6.95632	8.57284	7.24072	8.06873	7.20649	7.99056	7.80928	8.24005	7.97473	7.97015	6.46632	8.57882	6.94689	7.61844	7.43904	7.38802	8.15688	6.88013	7.9051	7.83759	7.74154	8.29011	7.99714	7.28946	7.90465	7.45431	6.5187	7.52626	6.66893	7.27631	7.42195	6.71178	7.10979	6.66166	6.62735	9.31829	8.33956	8.22366	8.93733	8.85908	8.72213	8.35387
CARS2	8.60493	8.53768	8.28691	9.04431	7.92026	8.79708	8.31599	9.02204	8.73688	8.32567	8.50578	7.74568	9.05	8.14898	8.29243	8.02435	7.42974	8.34023	7.76878	9.04792	8.40593	8.05617	8.52799	8.54037	7.39137	8.01032	8.44652	9.43081	9.98106	9.18279	7.97845	9.78314	8.18943	7.76294	7.75942	7.52928	8.95248	8.73617	7.66305	9.1306	7.50634	7.67649	10.7835	8.87729	10.0012	9.68614	9.35568	8.60369	10.4782
GSDMD	9.08911	8.77566	8.03679	8.21296	6.86472	8.42993	8.50237	8.0363	7.63113	7.49081	6.95527	8.38156	7.91591	8.29486	8.05084	7.76201	7.93506	7.90742	7.8623	8.32181	7.79645	7.5858	8.30139	8.06841	7.85744	8.25345	7.61284	8.95072	8.95405	7.60741	7.78057	9.99628	7.89625	7.21321	7.31855	8.53641	8.94979	7.75888	7.731	7.19284	7.13706	7.44421	8.5807	9.14572	9.95983	10.343	7.93847	8.64032	9.13531
TSR1	7.83596	7.62509	7.18906	8.60726	7.80282	7.09897	8.81408	7.65569	7.60493	8.49257	8.10654	7.60127	7.94098	7.73735	7.48193	8.09931	6.9804	7.91128	8.18096	7.73425	7.69473	7.96254	7.63293	8.16549	7.8372	8.15212	7.95288	8.24475	9.20194	7.64233	8.85016	9.5029	8.1963	6.78573	7.75492	7.42294	8.25058	7.947	8.4622	8.35724	7.69302	7.63012	7.75372	8.10638	7.77987	8.27176	8.13409	8.69688	7.48639
APPL1	9.63834	9.80803	8.95429	10.4068	9.61637	10.1169	9.46127	9.09092	9.02868	10.3851	10.1934	9.43227	10.0489	9.38047	8.63192	9.82286	9.11311	8.62244	8.88863	8.88421	9.62361	8.24406	9.19138	9.27381	9.11768	9.61602	8.83755	10.0022	10.2039	8.63072	8.53905	9.39011	8.83846	9.00882	8.85454	8.40936	9.53799	8.78842	8.93564	9.29067	7.67201	7.6551	10.4324	9.50724	10.145	10.6199	10.0076	9.13218	10.6312
DDRGK1	9.46011	9.14929	9.4265	9.58618	9.51306	9.68207	8.52944	10.4663	8.73702	9.73182	8.77108	9.64444	9.18459	9.92571	9.26431	9.06747	9.22025	8.90868	10.2322	8.95361	8.96033	9.0985	8.7597	8.59607	9.10801	8.7121	9.58916	9.96354	10.3248	9.96972	7.96102	10.1159	9.18786	9.13296	8.65302	8.09	8.99347	8.34666	8.07637	8.85596	8.42739	8.59548	10.7187	10.2924	10.9524	11.3184	11.1285	9.95146	10.0042
NDUFA8	9.80399	10.0001	8.33113	9.49772	8.58461	8.79658	9.51417	8.95898	8.63956	10.3569	9.15594	8.16401	8.94172	9.43321	9.03544	9.33322	9.10807	8.37531	9.18091	9.34229	9.31354	8.94666	8.19693	8.99643	8.95682	9.41361	8.70301	10.1919	10.3076	8.82529	8.68696	9.51513	8.58695	8.67349	8.2103	8.43921	9.74393	8.70343	8.69151	8.11267	8.43646	8.13579	10.0396	9.88893	10.3282	10.0075	9.41492	9.62182	11.3245
OLFML3	7.58941	7.94483	7.85479	7.73919	7.61778	8.62822	9.04742	6.90362	7.22676	7.31626	7.00402	8.64133	7.55454	6.72495	10.2828	8.94828	7.84374	8.00631	7.24308	7.33889	8.32538	7.76795	7.8859	6.60956	8.01924	7.04566	7.32828	6.32638	7.83154	7.4683	8.01578	8.66299	8.63393	7.70353	7.33267	8.0962	8.53617	9.59257	9.02068	6.94503	8.37927	8.20506	8.15337	8.38775	9.80074	9.85924	8.52008	7.96675	8.7582
MCTS1	9.0164	8.52384	9.25002	8.63859	9.8316	8.50318	8.58402	9.28168	8.97061	7.86616	9.30377	7.83826	8.27018	8.74138	8.58577	8.21147	9.10171	7.76141	8.94955	8.93963	8.20972	8.88834	8.63573	7.95098	8.50352	9.44089	9.76976	9.68254	8.98027	7.97409	9.4859	8.76726	8.7633	9.13701	7.67087	8.28052	8.61235	8.40905	8.56221	6.84852	7.86013	7.58477	10.3686	9.48399	10.4311	10.38	9.11019	10.7167	10.9364
SPATA20	9.04148	8.43229	8.33887	7.99733	9.25794	7.24599	8.30839	7.96681	7.64604	8.50031	8.21099	8.19741	8.38064	8.30509	8.53949	8.22221	8.12803	8.18109	8.73986	7.93015	9.01846	7.55308	7.69436	8.97643	8.4638	7.84105	8.09357	8.87545	8.28702	8.37849	8.20698	7.92591	9.14862	7.75361	6.97893	7.56861	8.00067	8.13281	8.74731	8.36345	7.52682	7.79696	9.10981	8.16707	9.88008	9.74359	10.8829	10.2493	9.75653
MEAF6	11.0208	10.1743	10.0299	11.2584	10.8811	10.5819	10.7088	10.495	10.4895	10.4619	10.2725	10.9191	10.2135	11.0784	10.2082	10.758	10.285	9.63518	11.4007	10.1606	9.58261	9.30808	9.95933	9.51244	11.1662	11.0652	10.8597	10.6956	10.5913	9.87414	10.2566	10.6768	10.3476	9.51763	10.3255	9.09014	10.359	9.74622	10.2687	9.67865	9.10459	9.74579	11.2003	10.7342	11.1331	10.7614	11.0923	12.197	11.4838
AMZ2	10.2603	9.42549	8.56747	11.3331	8.20838	9.77067	9.63312	9.45398	8.79578	9.79398	9.52768	8.98299	9.08383	10.1957	9.26722	9.96886	9.53933	7.4871	9.53021	8.46225	8.54969	8.56946	9.23725	8.63901	7.98831	10.0367	8.72012	9.62991	9.075	8.51331	8.88346	8.13397	10.1832	9.1445	7.96422	7.5287	8.79835	8.67949	9.14097	7.93101	8.92251	8.80685	10.0614	10.0308	10.9308	11.3864	10.4513	9.77067	11.0546
COQ8A	8.92513	9.59531	8.86901	9.68836	8.10857	9.40839	7.18598	8.21492	9.17133	9.32949	7.84643	9.69053	9.44071	8.08256	8.6014	9.84868	8.5429	7.39246	8.69101	9.53727	8.98578	8.77802	7.75666	9.13438	8.93922	9.13808	8.93544	9.18658	10.9617	8.295	8.47564	9.04823	9.90218	8.32373	9.29839	7.6391	7.97093	8.56873	8.43955	8.80727	7.61058	7.92212	10.1494	9.55449	10.8314	9.50408	8.50706	10.0599	10.0662
VAC14	6.74339	7.0228	7.00243	6.79866	6.90473	6.48073	6.82813	6.61497	6.79525	6.34705	6.48417	7.03581	6.73205	6.99239	6.53812	6.88961	6.68617	7.13482	7.07588	7.2632	7.12916	7.2285	6.88308	7.10786	7.20956	6.85104	6.83691	6.7063	6.52352	7.14667	7.25885	6.74531	6.77323	7.36736	6.74877	7.52031	6.91725	6.79043	7.1173	6.93435	7.0007	6.91585	7.21267	7.81785	6.93059	7.03019	7.00492	7.84576	7.83488
ISOC1	8.49001	8.93424	7.177	9.54844	8.12897	8.26749	10.4411	8.89961	8.25395	10.4455	9.77896	8.96321	9.15196	9.63872	9.26123	9.39178	8.54027	8.63321	9.16213	7.76032	8.61365	7.93203	8.0597	8.29768	7.31037	8.69707	8.60793	9.29924	7.8297	8.53417	8.29021	10.1226	8.67472	7.508	7.5373	7.42212	8.08727	8.62972	8.86326	7.59357	8.74841	8.40604	10.7956	9.74333	10.9585	10.5188	8.95349	9.33971	9.77744
VPS4B	10.8761	10.2193	8.85145	10.1783	10.4361	9.58143	10.4013	10.4035	9.20054	12.0045	8.96821	10.5955	9.88687	10.5749	9.91656	10.943	9.77744	9.51569	10.7057	9.45668	9.72087	9.44858	8.72132	8.51465	9.90106	9.75237	9.14694	9.28322	10.3506	9.87619	9.50735	9.912	9.86498	9.44183	9.51237	8.9258	9.9002	9.12924	9.79309	9.01784	8.79432	9.06005	10.8491	10.153	11.1665	12.3938	10.7219	11.2137	10.7081
TMEM254	6.2136	6.89694	6.35238	6.27206	5.48315	6.54035	7.41063	5.82524	6.01738	5.71873	6.42216	6.25122	6.31728	6.87154	5.74918	6.71625	6.36766	6.44474	7.5572	5.49439	6.37151	5.57077	5.51084	6.12993	6.38178	6.31046	6.84187	6.69141	6.2707	6.21471	6.24035	5.07169	6.24325	5.53483	5.59824	6.24388	6.09293	6.23066	6.68883	4.90272	6.03766	5.42418	6.49809	6.78843	7.19824	8.33877	7.84814	6.86797	7.65738
CCDC92	7.71766	7.28346	7.10416	7.58794	8.14635	7.82189	7.8785	7.33571	7.97197	8.0324	8.00038	7.99688	7.27982	7.43548	7.80008	8.08439	7.23256	7.39816	7.82698	8.1003	7.28766	7.62273	7.96582	7.73593	7.67006	8.00209	7.61198	7.66324	7.25754	7.31157	7.06044	7.90557	7.38273	6.98376	7.75156	6.84046	7.63172	7.80618	7.44793	8.35503	7.63194	7.69825	8.76995	8.68689	8.6314	8.22442	8.59654	9.02977	8.81283
MAGEF1	8.09955	7.72287	7.07894	8.44688	8.39042	8.20302	7.98469	7.63492	7.60836	9.38166	7.92179	7.04858	7.75586	8.47911	6.8287	8.87665	7.01329	6.6112	8.44345	7.15194	7.18224	7.76534	6.82471	7.10395	7.15644	7.60273	7.76269	9.0297	8.66448	6.80542	7.20818	7.46788	7.64245	6.74295	6.34252	5.64532	7.28178	6.99047	6.945	6.65616	6.84435	7.02217	7.67278	8.45152	9.04367	7.7298	9.92078	8.8522	8.92777
CHMP1B	9.55155	9.24235	9.52339	8.72729	9.33713	9.52467	9.31522	9.30244	9.56096	9.99413	9.45396	9.62598	9.6906	9.58377	9.46056	9.65494	9.66323	9.53528	9.46736	9.43714	9.56702	9.4203	9.59775	9.65193	9.61226	9.34689	9.5838	9.1804	9.09697	9.32103	9.12033	8.71972	9.67459	9.63393	9.47045	9.76107	9.3252	9.5415	9.55493	9.43376	9.59653	9.55436	9.05315	8.98032	8.70407	8.69825	8.81872	8.82566	9.03103
TRAPPC11	7.26175	6.22493	6.85338	7.09702	6.27871	7.31874	7.23942	6.68251	7.33769	6.97864	7.48923	6.64311	7.13829	7.16582	6.90192	7.05885	7.67631	6.31543	6.98784	6.3405	6.11877	6.75893	6.23229	6.8735	6.63271	6.54016	7.31437	6.97044	6.34379	7.16334	6.32404	7.31295	6.99717	5.82501	6.48486	5.6191	6.33225	6.73339	6.30844	6.48624	6.10047	5.68425	6.96553	7.55876	7.93719	8.90284	7.83506	7.65614	7.33947
EPS8L2	8.56868	9.07956	8.03718	8.65123	7.75658	8.2533	8.49342	8.8379	8.20001	7.87955	8.10849	7.69658	8.30358	8.62512	8.40998	8.10853	8.09011	8.35198	8.66666	8.39344	8.1051	7.80878	8.13016	7.9408	8.30705	8.12709	8.03683	8.57088	8.47706	8.47745	8.22672	9.24266	8.74241	7.2906	8.03935	7.68134	9.05972	7.64219	7.21277	8.3306	7.96633	8.07382	10.3443	8.36459	8.76521	9.52571	8.3755	9.81655	8.22551
TULP4	6.08606	6.83068	6.30093	5.89782	6.68313	6.6728	6.4547	6.23956	6.39628	7.21296	6.52098	6.68237	6.52439	7.11721	6.03475	6.4366	6.21649	6.5759	5.94501	6.80207	6.98806	6.31143	6.42614	5.4265	6.26528	7.08934	6.22301	6.35248	6.70633	6.59093	6.15271	6.17328	6.1184	6.5931	6.20355	6.2065	6.59911	6.24516	6.15301	6.48977	5.75094	6.75684	6.13787	6.65144	5.78898	6.31971	7.60524	7.39445	5.87548
RAB25	8.16486	8.3087	7.44658	5.51258	8.72773	8.12136	9.29465	6.58383	5.26873	5.55254	6.10274	8.35988	9.53629	5.67152	8.28458	7.87096	7.82717	5.259	8.4411	8.02636	7.69687	5.51432	7.87274	4.42854	5.18774	8.38922	7.94724	8.16989	9.21429	8.65081	7.45477	8.2416	7.81567	7.4732	5.31854	5.47554	7.41313	7.02387	4.98025	8.66024	6.53027	7.60883	10.5058	8.17311	8.73103	9.36278	6.63637	9.02398	7.25665
C8orf33	7.71679	7.44636	7.25542	9.08742	5.77508	8.89892	7.67139	8.01114	7.32211	7.01626	7.67648	7.76442	7.24966	8.77338	6.97967	8.35387	8.12928	6.81175	7.85151	5.66352	6.85833	7.327	7.46765	7.4048	7.0151	7.78868	7.52224	8.49603	7.73747	6.5864	6.00695	7.62546	7.17399	5.46446	5.60267	7.21925	7.71126	6.80143	7.26115	6.56554	7.02072	6.45136	8.23419	6.98711	8.90871	9.4849	8.65009	8.6687	9.60003
TIMM13	8.04573	8.34543	8.2658	8.70234	8.35432	8.45765	6.5848	9.04995	7.93186	7.78214	7.18464	7.68013	8.01386	8.90098	7.86289	7.25488	7.32777	7.69402	8.65015	8.42264	7.28356	9.17003	8.12828	7.66771	8.33688	8.28555	9.34275	8.69139	8.4038	8.63166	7.61651	8.59441	8.3421	7.78869	7.66551	9.2124	8.18105	7.8759	8.27192	6.95527	7.33541	7.62405	10.3832	9.33367	10.0107	9.44996	9.37997	9.0769	10.9477
NANS	8.92621	8.64027	7.75895	8.58144	8.57419	8.09766	9.21885	8.12947	8.7642	8.53049	8.3577	7.96296	8.55679	8.4344	8.83759	8.36809	8.12156	7.81073	8.83976	8.53315	8.88623	8.1867	8.03463	7.82909	8.13014	8.77607	8.0724	9.15237	9.54085	8.44489	7.80846	8.8808	8.02746	8.03308	7.86567	7.76371	8.68596	7.82221	7.9393	8.53899	7.31815	7.74248	9.12051	9.4171	9.38831	8.94985	9.38136	9.43114	10.2336
UQCR10	10.1416	11.5675	10.8823	12.1275	9.89066	10.2743	10.244	9.97503	10.6219	11.3212	10.32	10.0709	10.3554	11.215	10.9019	10.473	9.79971	11.3027	9.7775	10.3514	9.79196	10.8064	9.89416	10.3493	11.1353	10.6433	10.4742	11.0871	11.7322	10.9321	9.96106	10.8549	10.6411	9.03245	9.6681	10.5898	10.1897	10.2119	10.5537	10.1131	9.2067	9.5322	11.4646	11.6337	12.2979	11.7039	12.1056	11.1351	12.3767
LMBRD1	8.73828	8.56826	8.50486	8.33146	8.94885	8.8338	9.16473	8.75829	8.86319	9.14304	9.32198	9.23622	9.291	10.739	9.47669	9.71471	8.82012	7.94532	9.93519	8.22885	9.23255	8.33758	7.9447	7.47597	8.55946	9.51483	7.47978	9.54139	8.82618	8.70814	7.79989	9.33252	8.39233	8.46046	8.14272	7.72167	8.0021	8.2714	8.05676	7.8897	8.1132	8.14802	9.51939	8.86876	9.97243	10.4563	10.2693	9.93218	9.96892
IP6K2	8.69519	7.89624	7.46641	8.55498	8.59015	8.18953	8.22437	7.74978	6.86077	8.60865	8.90404	7.46166	9.00648	8.11732	8.18151	8.47412	8.02887	7.80345	7.94005	7.16634	7.82311	7.63598	7.79193	9.14785	8.01852	8.16186	8.74562	7.52934	7.8726	7.81082	7.3174	8.42002	8.40642	7.48401	8.1981	7.70144	8.60865	7.87741	7.73758	7.93199	7.87814	6.86487	9.64483	9.02478	8.7282	9.62282	9.67533	8.75562	9.84305
REXO2	10.1105	9.94657	9.97601	11.197	10.1827	9.8996	10.0437	9.83217	10.1708	9.78639	9.27528	11.0244	9.21645	9.90747	10.9527	8.94183	9.01714	9.36019	9.77849	10.8468	9.13839	9.71116	9.75081	9.42804	9.94326	10.935	9.9452	10.659	10.8466	10.1887	8.96599	12.3305	10.7726	9.93138	10.1573	9.57366	9.61992	9.92976	9.49971	10.2085	9.10512	9.22264	12.314	11.076	11.9486	11.714	11.1889	11.4378	12.668
ARMT1	7.27375	10.1095	8.5033	8.30878	8.74345	8.47343	8.59647	8.37631	8.06498	9.45372	8.28987	8.48734	8.25252	10.569	8.41234	9.31578	8.3809	7.93599	8.66653	8.32449	8.2499	7.29537	8.15098	6.90102	7.93152	9.14346	8.1888	8.93473	7.98957	8.35177	8.00258	7.19879	8.82982	6.68118	8.18284	6.79602	7.03067	8.54061	7.95028	7.65815	8.15268	7.85686	10.7169	9.48852	9.94974	9.71629	11.1142	11.2741	9.26197
OSTM1	6.1635	7.09724	5.853	5.31705	5.99178	6.43682	6.30762	5.41118	5.78862	6.50728	6.44646	6.12659	6.2176	6.09377	6.96211	8.18469	6.47003	5.34244	4.74466	5.93267	6.43943	5.72629	5.89154	4.34319	6.22669	6.93917	5.14662	6.37773	6.77124	5.36596	6.71128	6.55481	4.9746	6.11381	5.18169	5.68103	6.44636	7.05323	5.69514	6.27627	6.86801	6.29362	6.78124	6.63758	7.22743	7.76659	7.74398	7.97933	7.26284
DHX32	9.85884	9.39296	9.51512	10.0582	9.69476	9.26344	9.59606	9.05908	9.13853	9.93083	9.37698	9.78338	9.31595	9.73314	9.60668	9.2861	9.3833	9.51657	9.58046	9.34113	9.79107	9.45945	9.25983	9.38319	9.30357	9.41084	9.34525	10.1166	9.24685	10.1389	9.38762	9.692	9.42891	9.20484	9.1374	9.00576	8.86979	9.18779	9.63667	9.19691	9.22329	9.07874	9.55251	9.99185	9.90756	9.51332	9.57692	9.50394	9.74725
NDUFB2	11.7427	11.2991	11.3946	12.4565	11.002	10.8668	12.2823	11.4444	11.6038	11.4527	11.1674	10.8069	11.1106	11.6281	11.2369	11.8551	10.6665	10.3983	11.2686	10.7009	10.3333	10.8876	10.4175	11.1255	11.2559	12.7651	11.3813	11.682	12.5611	11.5833	10.9182	12.342	10.8866	10.2108	10.4887	10.1839	11.1794	10.5301	10.1953	10.014	9.61132	9.41915	12.6237	11.9298	12.5057	13.2321	12.7789	12.669	13.166
ALG5	10.0058	9.53152	8.87746	9.56574	9.4883	8.83003	9.24006	9.10921	9.32799	9.81244	8.62854	9.10196	9.83845	9.75557	8.92657	9.57802	8.74864	8.12077	9.92865	8.80487	8.15177	9.13362	8.85877	9.3534	8.68158	9.58427	9.60037	8.56525	9.19242	9.03423	9.0823	10.2592	9.0264	8.14411	8.48966	8.36872	8.9567	8.7399	7.36687	8.43378	8.14848	8.16612	11.2853	10.1906	10.6834	10.3428	9.81911	10.6934	10.9842
FYCO1	9.27043	7.79039	7.2207	7.98628	6.67023	8.30561	8.33462	6.94953	6.58002	8.4174	8.11953	8.02337	8.29153	7.38418	7.88733	7.44181	7.47191	7.05789	7.32329	7.64355	8.19873	6.86072	7.50205	7.67939	8.29706	8.20527	7.24286	7.37405	9.13346	7.80192	6.98152	7.94663	7.23214	7.60786	7.27732	7.30813	8.13304	7.77091	7.44212	7.77934	6.89532	7.47563	8.6627	8.18361	7.98076	9.06905	8.00229	7.88325	8.66054
MKNK2	10.436	10.4052	9.77222	10.8928	10.5915	9.58419	10.3208	9.89628	10.2066	9.58505	9.45497	9.06305	10.2756	10.386	9.24191	8.00912	8.65818	10.6017	10.078	10.9152	9.69305	9.84886	9.56006	9.88309	10.8604	10.5191	9.33467	10.8442	11.3602	10.0211	10.0765	11.672	9.46577	9.4776	9.49712	8.95191	10.3765	9.58482	9.69865	10.2845	8.98478	9.43532	12.5761	11.2544	11.4691	11.8071	11.0311	12.1583	12.2866
PQLC1	8.26767	8.81278	7.65935	7.75476	7.39668	8.0104	8.11495	7.66128	7.57515	6.99611	7.50855	8.09998	7.52849	7.98833	7.67088	8.47546	8.16793	8.15798	7.62088	7.77126	8.22066	7.78783	7.95625	7.45128	8.46676	8.15411	7.90058	7.83311	8.14834	7.65661	7.42086	7.44097	7.72566	7.73887	7.78687	8.01492	8.15411	8.04281	8.24628	7.918	7.41991	7.70512	8.59276	8.76377	8.78004	10.357	8.11346	9.36756	8.73064
FN3KRP	8.99935	8.20672	8.32544	8.67188	7.45376	9.01753	9.17968	8.4199	7.78187	8.70175	7.73313	8.31198	8.65282	9.47011	8.36816	9.10457	8.84346	7.37526	8.66465	7.42131	8.5904	8.32043	7.72298	7.26301	7.99889	9.04208	8.77835	8.862	8.31285	8.31427	8.63642	8.44572	8.85165	7.49449	7.52646	8.05249	8.03652	7.71495	8.25023	7.67243	7.65158	7.85029	8.67139	8.93503	8.87304	10.4301	8.94663	9.44639	9.92124
MLPH	9.45634	9.32167	9.1176	8.55925	7.81655	8.81961	8.53108	7.61211	7.6745	7.20587	8.3168	8.45777	9.61624	7.939	7.89213	8.07154	7.74538	7.86006	8.90159	8.32416	9.48461	7.42626	8.20296	8.88273	8.68852	9.31937	7.97016	7.92002	10.3938	8.89462	8.68411	9.19728	7.57953	9.02765	8.15072	8.48668	8.73911	7.96494	9.32208	10.0823	7.52895	7.58932	10.0252	8.29653	10.3736	10.1365	9.097	8.55477	8.3724
MOCS2	6.74625	6.00875	6.63346	6.05431	6.64459	6.25033	7.08078	6.49429	6.77602	6.66037	6.33609	6.65208	6.49409	6.35371	6.86113	6.01163	7.3652	5.8229	6.38676	7.22813	6.01483	6.13479	5.82929	7.30245	7.45381	6.16546	6.20014	6.74657	6.02953	6.02101	5.6367	6.2429	6.4247	6.7414	6.08188	6.03307	7.15942	7.09814	6.28103	5.86385	5.99307	5.24239	7.93872	6.05431	6.74445	6.75323	5.8799	7.03788	7.53123
TMEM258	11.4232	11.1998	10.1144	11.5976	10.9184	10.5072	11.0021	11.3525	10.5551	11.7073	11.4255	10.4175	10.7333	11.2916	10.8124	11.2661	10.1638	10.5094	10.7195	11.0242	10.2503	10.9113	10.8807	10.6492	10.8606	11.5503	12.171	11.8432	11.3386	11.1064	10.6529	11.6392	10.7908	10.1528	10.7423	10.2077	10.9572	10.5049	10.5795	9.94059	9.68821	9.91507	12.4242	11.7294	12.3952	12.3469	12.3456	12.5062	12.9774
ATG101	9.35331	8.34478	8.68715	9.4833	9.3937	8.48929	7.90521	9.04682	8.70766	9.55473	9.15673	8.57462	8.77014	9.14824	8.63821	9.70439	8.7941	7.9349	9.85092	8.3725	8.26357	7.96323	8.08317	8.00993	8.82903	8.72722	9.73427	8.53904	8.65499	8.45603	8.04852	7.70657	8.90624	8.57809	8.09486	7.72745	7.88651	8.02784	8.55346	7.49412	8.05439	8.81001	10.1529	10.7564	9.72257	10.1082	10.3016	9.88684	10.2577
NR1H2	5.4429	6.33175	6.5585	6.06918	5.78931	6.30096	5.96886	5.70032	6.12871	5.70943	5.98696	5.78964	6.02081	6.06786	5.86678	6.22307	6.01247	5.91175	5.99431	6.60391	6.51862	6.26908	6.64853	6.50176	6.59391	6.10761	6.23165	6.46494	5.95185	6.63927	6.26102	5.73369	6.13616	6.8181	6.69344	6.97783	6.05718	6.55868	6.64651	6.89983	6.46903	6.35139	6.75022	7.05447	6.11984	6.92115	6.58729	6.35013	7.09051
ARL6IP4	10.163	8.71934	8.90428	9.39637	9.03008	9.40834	9.10145	9.2922	8.48532	9.48335	8.76927	8.61507	9.79817	8.49707	9.1248	9.71297	9.15275	8.94986	9.80279	8.95554	8.72994	8.39865	8.98711	9.03241	8.56269	9.62569	10.0908	9.1467	8.8818	8.42677	9.43882	9.39119	8.98636	8.17369	9.19071	8.43323	8.67232	8.71264	8.80506	8.52729	7.89542	8.70439	10.7913	9.92622	10.5691	9.44789	9.73026	11.2585	10.4288
SCPEP1	8.45292	10.7753	9.28591	7.67755	7.7936	8.57427	7.45122	9.10018	6.62824	8.81684	9.02205	7.18689	6.97734	8.38169	8.78547	8.93255	8.15761	7.30809	9.35604	8.96368	8.62124	7.35388	7.7044	8.73803	9.86835	10.4327	8.86108	8.6139	8.33353	7.325	10.1236	9.30074	8.07256	8.28123	7.85598	7.4054	8.0887	8.54413	8.30729	8.54502	7.62277	7.56597	8.04514	9.05723	10.1105	8.85535	10.5633	10.0264	8.00228
APPL2	5.18025	4.30267	4.51778	4.83761	4.58799	5.13643	4.97047	5.14545	5.31168	5.77474	5.71165	5.46563	5.5196	5.47571	5.36401	7.2129	5.26934	4.2602	6.39728	4.30733	4.62529	4.25677	4.87246	5.02834	5.54322	4.62068	5.87385	5.44545	4.14866	4.50523	4.72791	4.83121	5.09779	4.70515	4.59085	3.95855	4.54399	4.48695	5.30911	4.74313	4.92293	4.7662	5.66221	5.2446	6.78175	5.45145	5.27803	6.53297	5.63417
C12orf10	8.09354	6.96715	7.48858	8.66611	7.34849	7.87073	6.77789	8.30718	7.59822	8.19727	7.91012	7.51415	8.63968	7.2871	7.44679	8.47593	7.87812	6.75196	7.81101	7.68086	7.5942	7.15349	8.01255	8.69131	7.95071	8.11442	9.34234	7.87474	7.60742	7.6965	7.15567	7.15974	8.20619	7.94811	8.2014	7.53315	6.7555	7.36946	8.90152	10.4068	6.70342	7.43392	9.45874	10.7424	9.82811	8.29846	9.59564	9.31655	9.45895
ARNT	7.33893	7.44999	8.20078	7.09446	7.76414	7.69415	7.25063	7.92405	7.80547	7.2253	7.39967	7.55232	7.41702	7.3574	7.64653	7.5033	8.17235	7.81546	7.48878	7.78324	7.74148	8.00542	7.56849	7.47552	7.97088	7.44572	7.91745	7.61437	7.31141	7.62902	7.50109	7.44634	7.77958	8.13904	7.90238	8.33522	7.72665	7.24804	7.35049	7.78324	7.85917	7.96109	7.31943	7.05379	7.08579	7.15483	7.59317	8.6238	6.78675
PLEKHO1	6.35235	6.16762	6.9222	6.8508	5.8183	6.79159	5.75782	6.87203	6.12597	6.83634	6.62029	5.72621	5.23488	5.82881	5.94362	7.09796	6.44003	6.08601	5.42628	6.1429	6.18155	7.04202	6.46394	6.03878	6.18927	5.66631	6.97839	6.79818	6.22334	6.14456	6.04794	6.33891	5.74844	5.5261	5.96649	6.01473	5.94716	6.62175	6.20099	5.90064	5.93449	6.50627	6.26356	7.56449	7.00089	6.65889	6.83881	6.41059	7.0822
PNMA1	10.4057	9.83621	8.96385	10.1677	9.53679	9.8444	9.36119	11.0751	8.83763	11.4749	10.4313	9.31131	9.50083	10.392	8.80845	10.7228	9.61009	8.73292	10.5076	9.54526	7.91362	9.62135	9.38643	9.11974	9.26367	9.08132	10.8265	10.3337	8.64695	8.58528	9.49205	9.31357	9.72147	8.04479	9.05166	8.293	10.1822	9.31028	9.67425	7.62488	9.03535	9.02184	10.5096	11.1598	11.5671	10.2021	11.8341	10.4129	10.563
ECSIT	5.72635	6.97788	6.05996	8.05872	6.08468	5.65481	6.01055	7.70606	6.81105	7.05411	5.96478	6.36458	6.37887	5.94656	5.77485	6.84377	6.24657	5.62714	5.70392	7.07108	6.59849	6.33214	6.55098	6.25841	6.58785	5.4746	7.60643	6.55098	6.38283	6.44119	5.85487	6.49939	6.45172	6.47375	5.99891	5.90398	5.86672	6.15202	6.35263	6.62994	6.7379	6.40128	8.55936	7.63718	8.25241	6.54044	7.24578	8.60624	7.62383
NDUFB4	9.13972	9.87153	8.65796	10.1536	8.66098	9.44168	9.76956	9.99313	9.09919	8.58853	9.29394	9.1674	9.33556	9.72377	9.14698	9.94386	9.26563	8.78331	9.61759	8.87209	9.18807	8.4526	9.00855	9.03723	9.31335	10.0356	10.0264	10.572	9.48465	9.5535	9.18419	10.3994	9.18695	8.44064	8.44273	8.40164	8.86191	8.67224	8.25824	8.32143	8.10083	8.33812	10.1938	10.2636	10.8101	10.3332	10.4986	10.4593	10.7955
NUBP2	8.89175	9.14758	8.78829	8.8475	8.20855	8.5424	8.45962	9.14187	8.40007	8.79902	8.1924	8.79745	8.48689	8.82503	8.69956	8.90777	8.65251	8.39693	8.96041	8.46262	7.80677	8.31824	8.70213	8.93534	8.81659	9.23223	9.48124	8.42198	8.70989	8.63045	8.39124	8.22936	8.98251	7.89481	8.71444	8.78944	8.33101	8.72048	8.80312	8.44881	7.76837	8.5691	9.79797	9.69776	9.44613	8.73264	10.297	9.94791	9.53964
TNKS2	8.55927	7.15568	7.55701	7.64488	7.26756	7.45653	8.60023	6.36686	7.6223	8.32996	7.41381	8.09085	8.11579	8.23993	7.99173	8.50808	8.09465	7.23331	7.1577	7.33099	7.46952	6.88829	7.22164	7.44839	7.63245	8.44516	7.84408	7.81334	8.90684	7.40067	6.81182	7.76491	7.52069	6.81058	7.58542	7.0025	7.86026	7.37016	7.51132	7.59848	7.66935	7.34147	9.17206	8.01548	8.00114	8.14781	8.20333	8.2184	7.45434
POGK	7.89165	7.96306	7.55954	8.13158	7.66229	7.87691	8.30348	7.25512	7.73836	8.43108	8.59722	8.42859	8.35496	8.16203	8.03724	9.30297	8.32655	7.50204	8.88592	7.95193	7.01936	7.47681	7.14828	7.71823	7.41284	7.32625	8.05571	7.78066	7.91263	7.48619	7.13226	7.87591	7.72321	8.17866	7.57216	6.58284	7.74546	7.59493	7.70952	7.42074	8.14749	7.59062	9.23639	8.47546	7.78469	8.51142	8.50428	8.28603	9.07952
ARFIP1	10.2742	9.98097	9.06384	10.0133	9.06017	10.0825	10.0762	9.87504	9.42005	11.1775	9.3232	9.81469	10.0392	10.5229	9.73453	10.0411	9.65791	8.6628	10.4705	9.78076	8.68481	9.83782	8.9861	9.04851	8.91755	10.2261	9.92534	9.68141	9.66887	9.1414	8.9953	10.6836	9.60167	8.44353	9.31512	8.57242	10.2259	9.43974	9.06519	9.06699	8.53278	8.34832	10.2788	9.99081	10.9602	11.3031	10.6132	10.2825	11.2999
NAGK	8.62555	8.83936	8.40388	8.86628	8.68174	8.7145	9.81743	8.66068	8.36649	8.3428	8.74395	8.43258	8.74408	9.0303	9.20646	9.83722	8.85265	7.92704	8.65252	8.40454	8.49482	8.59615	8.16722	8.42584	8.4982	8.77524	8.3119	8.85037	9.33419	8.16143	8.66772	7.96983	8.63675	9.01592	7.75008	7.89228	9.21553	9.06318	8.20995	8.86294	8.44743	8.621	9.00722	9.08631	9.66729	9.9339	9.98067	9.29672	9.14166
C1QA	7.98737	7.68478	6.71705	6.67793	7.29838	8.23268	7.09003	5.82413	7.27866	5.84799	5.60417	5.84846	6.04918	7.30972	7.16387	5.00608	5.54003	7.12394	5.13041	6.61055	7.41615	7.12332	7.4346	4.99592	7.43508	5.85816	6.5315	8.75372	7.52943	7.44114	8.40405	7.85117	6.43128	6.71176	6.65107	7.24004	7.17143	8.62308	6.35635	6.45354	6.39648	7.25756	6.86909	6.09255	8.78189	7.9307	6.98911	7.31057	7.11493
UTP11	8.40522	8.45234	8.162	8.66059	9.12276	8.4457	7.93405	8.77675	8.13176	8.37431	7.74922	7.75956	7.60719	9.18799	8.08227	8.38216	8.36816	7.99977	9.22677	8.63637	7.58591	7.84084	7.9976	7.49375	9.05375	8.42134	8.55713	8.9648	7.93075	8.70395	8.22659	8.25907	8.32156	7.47211	8.20773	7.35416	7.69413	7.58667	7.95012	7.36504	7.23568	7.22422	9.23084	10.0279	9.6547	8.91153	8.51377	10.2557	9.74451
PRKD3	8.15431	6.62989	7.11127	6.29839	4.87198	6.88859	6.51487	5.94249	4.04442	7.70581	7.55746	6.94292	6.86986	7.50057	6.50914	9.02135	7.27511	4.66125	7.69996	7.00811	6.1053	6.16436	5.46913	6.52489	6.56314	5.98533	7.68078	7.26708	6.20175	5.05434	6.84238	6.6786	6.22872	6.12785	5.36805	5.50089	6.76938	6.13521	5.99567	5.78945	6.23181	6.60135	4.10393	7.40423	8.2404	7.45103	7.62862	8.063	6.67339
GTPBP4	10.5796	10.3734	10.1399	10.9883	10.1113	10.1947	9.61309	10.0887	10.1657	11.4947	10.1488	9.91968	9.34438	10.5722	9.88681	10.7408	10.2981	9.04885	10.4795	10.0207	8.39411	9.42095	9.50914	9.2776	10.7775	8.94264	10.477	10.5916	10.5699	9.96528	8.6056	10.0985	10.4288	8.95097	9.49334	8.44022	9.62123	9.46558	9.05496	9.00069	8.76723	8.66284	10.8002	10.4548	10.9101	10.8237	11.2102	10.9513	10.914
NKIRAS2	7.70671	8.06463	7.49885	8.01833	7.66331	7.67061	7.66361	8.74834	8.23222	7.94	8.07238	8.09981	7.64116	8.65209	8.39635	8.29879	8.56731	8.08482	8.04803	8.57072	8.10114	7.80624	7.65124	7.72896	8.31214	7.99389	8.88577	8.13501	7.37053	7.69974	7.81786	7.55714	7.69442	8.02575	7.77448	7.74318	7.83183	7.94787	8.09026	8.06572	8.42353	8.26839	7.71625	8.88204	7.93481	7.67714	9.11962	8.46473	8.15683
GOLGA5	9.8862	9.5555	8.40509	9.32694	9.14508	9.22657	9.85137	9.95299	9.35671	10.0689	9.39974	8.49765	8.74495	10.0173	9.08498	8.90461	8.85371	8.28831	9.79497	9.29057	8.9004	9.244	8.80474	9.02792	8.61363	8.5446	8.95881	9.0867	8.57709	8.9256	8.63571	9.83567	9.02686	8.21037	8.9113	7.7193	8.85555	8.52989	8.20324	8.68967	8.57951	8.36995	10.137	10.1432	10.0529	9.75885	10.9845	11.0147	10.11
KMT5B	8.63113	8.90281	7.835	8.20881	7.48339	7.87174	8.55476	7.96033	7.94808	9.36182	8.57441	8.06116	8.52234	8.27108	8.71687	8.63113	7.96666	8.93297	8.67191	8.77079	7.90225	8.07299	7.71059	8.2535	7.73298	8.59883	7.31198	9.15084	9.13867	8.50022	7.8499	9.07481	7.62378	7.66822	7.324	6.8926	8.65187	8.00371	8.34708	9.23821	8.0661	8.25933	9.54972	8.22287	9.10472	9.61595	9.06917	9.65351	9.66718
RUFY1	8.82955	9.44616	8.47795	10.275	7.5112	9.39938	9.9912	9.39523	8.68097	8.87361	9.02614	9.07982	9.53907	8.94088	9.05088	8.74013	9.16371	9.23473	10.0234	8.55587	9.58424	9.039	8.96463	9.41143	8.51044	9.12099	9.16841	9.42626	9.64957	9.42658	8.62883	9.78992	9.2043	8.36059	8.16855	7.75125	9.15148	8.85044	8.66641	8.43103	8.25993	8.44059	10.2745	8.5662	10.4396	10.7999	9.23723	9.45468	10.4715
NOL8	7.98163	6.5572	7.01754	7.65857	8.34437	7.63891	7.59697	6.74058	7.20458	7.0247	7.45381	6.79978	7.58453	7.37618	7.25013	7.25988	6.70251	7.33275	7.47833	7.46115	8.11632	7.4711	7.17539	7.3097	7.22913	7.33802	7.24766	7.21625	7.78978	7.36812	6.91578	8.07138	6.93897	6.21797	7.17762	6.20828	7.38469	7.14592	6.94666	7.20203	6.70809	6.23471	7.59625	7.96506	7.81845	8.66841	8.46474	8.32386	9.26351
TSKU	7.83939	7.95255	7.75166	7.66152	8.64312	7.9884	7.89603	7.85388	7.90788	8.09116	7.65442	8.1684	7.91309	8.04985	8.60866	7.8091	7.68548	8.36713	7.81461	7.97091	8.67164	7.89271	7.81218	7.91778	8.34265	8.14569	8.45606	8.13175	7.85198	8.4223	8.79696	8.33159	8.20579	7.96423	8.10594	8.35695	7.7857	7.91633	7.89827	7.72493	7.53197	7.85955	7.80188	8.22251	7.48766	9.311	9.33636	8.07471	8.08588
MUL1	8.0991	8.83975	8.6605	8.83083	8.80659	8.70787	8.76884	9.20081	8.70564	8.57208	8.80646	8.32522	8.68751	8.61171	8.66197	8.76884	8.72656	8.70174	8.49127	8.32336	8.74033	8.47231	8.33405	8.49318	8.43614	8.76884	8.95229	8.78728	8.9204	8.65958	8.42919	7.80426	9.02581	8.72638	8.78762	8.65062	8.73611	8.66019	9.00122	8.97808	8.817	8.46053	9.26834	9.08011	9.04463	9.04561	8.64635	8.82725	9.03578
MEX3C	9.90614	9.22851	9.31304	9.19498	8.86158	9.18577	9.12538	8.99368	8.51147	10.272	9.30074	9.71348	9.26401	9.50523	9.10896	10.5621	9.28003	8.7703	10.0197	9.24428	8.27687	9.10668	8.76297	8.46573	9.19236	9.19467	9.23151	10.1202	9.14827	9.18282	8.25329	9.28921	8.90722	8.35047	9.14696	7.94606	9.23123	9.27691	9.02599	8.82649	8.56536	8.80612	9.58484	9.82431	10.0392	11.6668	10.5398	11.283	10.3266
FAM111A	9.86788	9.23305	7.91656	8.17083	9.7766	8.45669	9.48842	9.27074	9.01984	10.0858	8.90225	8.81222	8.49995	8.82	9.46481	8.84326	8.32024	9.00177	10.3954	9.00387	8.84086	8.8144	8.89495	8.32338	8.50956	9.58504	9.0117	8.90666	9.58233	9.15604	9.76275	9.00575	8.88935	8.69664	8.72276	8.6148	10.0505	9.05293	8.79463	8.63568	8.73862	9.1052	9.95466	8.71811	10.1767	10.0273	9.47778	10.3129	9.74722
ZDHHC6	8.76557	8.32173	8.94971	8.91888	9.06254	8.83561	9.2214	8.89117	8.83132	9.39987	8.15924	9.21189	8.7106	9.4849	8.85285	9.43092	9.23389	8.49823	9.8612	8.22189	8.7008	8.22217	8.96319	8.62534	9.21639	8.01019	9.32871	8.74616	9.08189	8.42251	8.10498	9.04211	8.52204	7.98287	8.34235	7.88655	8.13285	8.30871	9.43527	8.87306	8.73207	8.4174	9.64545	9.84999	9.13556	8.98531	9.8193	9.42691	8.66789
MID1IP1	7.69747	7.28117	7.2544	8.10671	7.95318	7.90148	7.52655	7.40241	7.49586	7.17324	7.43678	7.76735	7.31655	7.11034	7.11811	7.35901	7.15032	7.48155	7.40403	7.28001	7.18438	7.28789	7.25392	7.40046	7.39569	7.96061	7.55339	7.86078	8.00325	6.51932	8.03563	7.37017	7.42612	7.26384	7.11024	6.95899	7.20363	7.5268	7.91795	7.15164	6.44579	7.19216	8.8267	8.68922	8.9097	8.12249	9.04673	8.10743	9.06971
CKAP2	8.80995	8.89341	8.35669	7.32966	9.49078	8.0368	8.19798	8.9788	9.22365	9.55334	9.07261	7.69447	8.34622	9.32585	8.7953	9.74894	8.35097	7.74206	8.22558	8.77284	6.56995	8.56288	8.91195	9.32979	8.31462	8.27042	9.60451	8.36223	8.00469	8.32908	8.30393	7.68954	8.63465	7.15071	8.58843	7.10076	8.64802	8.29602	7.5652	7.79487	8.49567	7.99427	10.6471	8.96322	9.33035	8.82712	9.45606	10.2343	10.2079
EIF2D	8.69934	8.9269	8.34227	9.65236	8.33743	8.88353	9.0013	9.30776	8.92255	8.96276	8.73186	9.5031	9.68548	9.01494	7.98144	9.62784	8.652	8.82179	8.62259	9.48858	9.33679	9.4882	8.71939	9.80435	8.73485	9.19921	9.30296	10.031	9.09382	7.91595	8.44239	9.78047	9.67269	8.91276	8.59247	8.56889	8.60812	8.86512	9.09892	8.68666	6.74409	8.74986	10.598	9.95797	10.6714	10.1108	9.47497	9.20391	10.6975
SAR1B	8.03854	8.38296	6.77632	7.4691	7.65758	7.01413	8.8854	8.07691	7.55553	8.25998	7.00747	7.30538	6.96059	7.40781	9.04406	6.52463	7.82745	7.25151	7.93471	7.58572	8.16721	6.96447	6.63535	6.93865	8.25216	8.13662	8.05499	8.38061	6.81603	7.96635	8.03103	8.15126	7.41161	6.9	6.54501	7.55262	7.50035	7.7721	6.87985	6.56393	7.11822	7.40402	7.74013	8.75005	9.24251	8.62147	9.18907	8.97671	8.90052
FBRS	6.26212	6.45857	6.28699	6.56341	6.34773	6.1194	6.10669	6.38909	6.40375	5.78575	6.25444	6.4305	6.01416	6.02447	6.07478	5.86239	6.17343	6.61718	6.2098	6.30998	6.45193	6.34874	6.17289	6.40738	6.16293	6.22344	6.64498	5.94339	6.07457	6.59113	6.0462	6.41382	6.33882	6.64755	6.51776	6.21343	6.01353	5.93072	6.70607	7.053	6.61082	6.29043	6.67967	6.70546	6.63732	6.5487	6.50768	6.24118	6.93109
NUP54	9.86468	9.61699	9.37827	8.54313	9.35349	9.52636	9.96689	9.31081	9.27236	9.64235	9.52416	8.88806	9.37941	10.1201	9.12872	9.44215	8.98968	9.9831	9.87474	9.28234	8.16847	9.0001	8.4402	8.62786	8.99327	9.59723	9.37048	9.18391	9.69402	9.32562	8.91346	10.1557	9.36352	8.25595	9.07992	8.52748	9.56263	8.84749	9.27386	8.31148	8.59263	8.22075	8.9846	9.77878	10.3061	10.6167	10.2108	10.1436	10.5614
MKL2	9.09023	9.69133	8.84023	9.76917	8.37922	9.06402	8.39061	8.8391	8.46759	10.5193	9.26571	9.15473	8.31737	9.71916	9.03342	9.45539	8.88759	8.04321	9.71883	8.32594	8.70255	8.81796	8.16693	8.6469	8.4032	9.26571	9.06208	8.91742	9.95679	8.89475	8.88312	9.37787	9.3084	8.22243	8.12715	8.08022	8.76642	8.61269	8.45726	8.83704	8.51958	8.49317	10.168	9.28337	9.5804	9.59809	11.1724	9.88846	9.70236
AP1M2	7.73537	8.32268	8.3114	10.8103	8.85859	7.91569	9.12982	8.78511	8.16344	9.00817	9.06906	8.53578	8.19959	9.33601	8.21965	9.01272	8.01611	7.96567	8.47248	9.10006	8.00733	8.33125	8.34614	7.3209	8.71382	8.18535	8.42088	8.28054	7.89284	8.73704	8.09016	8.14467	8.82896	8.50752	8.50852	7.97142	9.05404	8.11747	8.47028	8.39351	7.35213	8.03286	10.0137	9.25229	8.4487	7.90692	9.20593	9.87204	9.79712
RMND5B	6.86047	7.36257	6.60805	7.28601	6.70652	7.3494	7.56769	7.52883	7.20454	7.39237	6.93005	7.01203	7.06891	7.06069	7.40356	7.02337	7.63376	7.12671	7.47697	6.96078	7.07722	7.08619	6.89734	7.57438	6.72582	7.40627	7.08038	7.44095	7.23427	7.36686	6.86194	7.31074	7.14338	7.6252	6.42571	7.03292	6.67512	6.86051	6.96148	7.31167	6.84928	7.36075	8.82006	7.12266	8.07689	8.53166	7.68241	7.49453	7.49065
ZBED5	10.0352	8.97995	9.26056	9.53833	9.17919	9.50945	9.33488	9.76261	9.05534	10.2905	9.72388	8.97838	9.59563	9.24761	9.49832	10.2406	9.08105	8.63382	10.987	9.12211	8.32619	8.84203	8.49864	9.69011	9.05614	9.73536	9.46265	9.41526	9.25465	8.51085	9.38747	9.9555	9.57159	8.22281	9.0692	7.84399	9.89091	9.02323	9.18359	8.62357	8.96898	9.04089	11.1004	10.2184	10.9304	10.7023	11.0006	10.6095	10.4077
SECISBP2	8.47811	8.52131	7.31655	7.68466	7.42311	7.93552	8.1633	8.16111	7.66997	8.45958	8.28583	7.61594	8.85759	8.93382	8.10651	8.81389	7.69005	7.25727	8.2359	7.37256	8.43949	7.93724	7.19393	8.76409	7.52437	8.29587	7.66785	7.4792	9.44691	7.48763	7.79041	9.13404	7.62701	6.78176	7.45695	7.02564	8.49623	7.55709	8.16952	8.09616	7.47745	8.12427	8.49857	8.31207	8.23285	8.94194	8.36381	8.9558	8.8222
TBC1D15	7.51869	7.71146	7.26739	7.10324	8.45089	7.73402	7.70399	7.14657	6.86001	7.65506	6.8543	7.0205	7.40872	7.56159	8.38101	7.6277	6.93852	6.74257	7.97905	7.15045	6.375	6.81819	6.97476	6.58301	7.73034	7.76002	7.96436	7.16093	7.10541	8.07242	7.03338	6.94521	7.87516	6.78503	7.60423	6.88805	7.21194	7.3248	7.53984	6.74358	6.28253	6.63307	8.28536	9.4738	8.64956	7.58234	8.39941	8.56385	8.47661
DROSHA	11.2292	9.94494	9.59058	11.641	10.4891	10.3307	10.2749	10.2997	10.2602	11.4106	10.3019	10.4406	9.93719	11.2917	10.192	10.446	10.1643	9.47314	10.7593	10.3192	10.1647	10.4507	10.5152	10.0622	10.5933	11.1481	10.7463	11.3955	11.183	10.6518	10.1505	11.1843	10.1656	8.5149	9.63361	8.95447	10.2096	10.0787	9.68654	10.707	9.35135	9.65624	10.6572	11.0385	11.161	11.2315	11.6185	10.9888	11.8443
MRPL24	10.3643	10.5182	10.1093	11.5587	8.55185	10.2186	9.87421	10.4237	9.50434	9.63957	9.51625	10.026	10.4305	9.55985	9.71753	9.94769	9.54022	9.7772	10.001	9.69418	9.43452	9.18259	9.48836	10.0835	9.88044	9.86507	10.1262	10.5755	10.7895	9.77111	9.73668	10.3005	9.67028	10.009	9.38575	8.95433	9.72679	9.53315	9.24794	9.14325	9.20399	9.37889	10.3555	10.2907	10.823	10.8199	9.33544	10.3261	11.4596
PARL	9.44113	9.89549	9.21362	9.53581	9.44131	9.55917	9.53179	9.39519	9.3516	10.2223	9.14153	8.53004	9.45438	9.47	9.25337	10.1219	9.08857	8.73247	9.62451	9.04544	9.12565	8.98695	8.68127	8.93812	9.08735	8.92503	9.44755	10.4251	10.3019	9.33837	8.82147	9.40209	9.21896	9.14681	8.67136	8.49155	8.8547	9.0409	8.52391	8.6057	9.00889	9.12338	10.2618	10.2476	10.8198	9.29687	11.1907	11.0092	10.5365
TTC38	7.84321	8.02474	7.87155	8.01314	7.99889	8.23068	8.05946	8.08021	7.80089	7.63663	7.39432	7.96635	8.09877	8.16806	8.09553	8.13393	7.89382	7.61886	8.05441	7.95056	7.76928	7.97328	7.66643	7.67723	8.25015	7.70862	7.63829	7.46057	8.62026	8.31826	7.90639	7.70578	8.13361	8.02655	8.04655	8.03719	8.24018	8.24238	8.24543	8.00874	7.41963	7.80645	8.96311	8.48638	8.56753	8.30025	8.05946	7.89746	8.30844
ANKZF1	7.26841	7.07219	7.15564	8.21621	7.03478	7.17066	7.55767	7.36449	7.25286	7.46582	7.33031	7.26977	7.67153	7.35228	7.36659	7.2484	7.09262	7.19162	7.76122	7.38836	7.27585	6.3082	6.89737	6.93622	6.84667	7.22726	6.99873	6.95213	7.56373	7.60634	6.69229	7.03411	7.46921	7.26439	6.90836	6.65317	6.96273	7.05806	7.24567	8.26295	6.92295	6.91983	8.1067	7.47523	8.26262	7.36487	7.07568	7.64253	7.5336
SLC25A10	6.63394	6.31687	6.55223	6.88286	6.19621	6.45447	6.3103	6.51678	6.12866	6.76843	5.74482	6.11663	5.88721	7.00765	6.04308	6.23632	6.33581	5.97346	6.06496	6.66845	6.72676	6.33163	6.58518	5.97609	6.64436	6.91323	6.53616	7.23069	6.46784	6.22163	5.90661	6.10941	6.59576	6.7281	6.23687	6.78811	6.32331	5.24364	6.2637	6.51939	5.79113	6.42655	6.59906	7.85367	7.27525	7.85354	7.73432	8.40312	7.7941
WDR74	9.20717	9.00528	8.54581	9.76339	8.92878	8.84756	8.63031	9.15923	9.06598	9.25356	8.76418	9.26514	8.90448	8.62231	9.03457	8.83509	8.7237	8.41512	8.78525	9.4122	8.69183	8.87476	8.96646	8.84908	8.90373	8.797	9.14845	8.99531	9.15749	9.16723	8.9	8.96941	9.12204	8.80321	8.99838	8.74442	8.81206	8.7633	8.86948	9.23471	8.77466	8.59673	9.9469	9.58402	9.2919	9.30221	9.45904	9.72285	9.8153
HIST2H2AA3	5.18004	5.15884	5.28001	5.62128	5.3055	5.1258	4.6504	6.05527	5.32136	4.93917	4.72606	4.80204	5.09659	5.13257	4.5993	4.87773	5.09319	5.38032	4.83791	5.16563	4.95055	5.09208	5.10913	5.6165	5.40411	5.63208	5.48107	5.21995	5.58979	5.12535	5.14008	5.68182	5.51719	5.37548	5.03155	5.90941	5.34053	5.0197	5.62736	5.08845	4.98361	5.0147	5.13314	5.88296	5.55735	5.36965	4.98457	5.44925	5.4814
MRPL48	8.11094	8.25978	8.27571	8.28932	8.94396	8.09279	7.87505	9.51008	8.94527	8.70227	7.51158	8.32415	7.68168	8.31923	8.36604	8.5181	7.58933	9.46047	7.43678	8.60978	7.20135	8.04337	8.54837	7.7239	8.10751	8.42342	9.08084	9.1821	8.22926	9.11233	8.10072	8.77853	8.53756	7.58847	8.18877	8.1462	7.42861	8.22302	8.02615	8.5391	7.74491	7.08025	9.36294	8.36716	9.77824	9.06049	7.41298	8.97382	10.195
EDEM2	6.38878	5.95434	6.36127	6.33691	5.83891	6.13509	6.25052	6.77641	6.8333	7.06361	7.44063	6.96023	6.25862	6.40035	6.32417	6.91085	6.52863	6.06369	6.67343	7.00065	6.02927	6.26178	6.8793	6.06277	6.68641	5.90059	7.01118	7.03979	6.17475	5.81982	6.14156	6.08801	6.67734	6.79585	5.74063	5.83409	6.53013	6.42999	6.86161	6.30544	6.06796	6.79832	8.02559	8.28837	7.29659	6.5025	6.70992	6.74211	7.47468
SS18L2	9.53829	9.12935	8.37618	9.66908	9.165	9.19658	9.12309	9.08953	8.23626	10.058	9.29029	8.66088	9.30935	9.25039	8.36816	9.50009	8.62764	8.81465	8.87129	8.9263	8.70165	8.68538	9.11333	9.40956	9.20665	9.75138	9.71104	9.02877	9.56436	8.61033	8.58418	9.5342	8.78443	8.35487	8.67092	8.0979	9.40258	8.67191	8.81986	8.94959	8.6536	8.46285	10.1948	9.93672	9.85661	9.99664	9.65731	9.96474	11.1762
SMAD3	8.66085	7.19029	7.42056	7.34436	7.5868	7.59525	8.36318	7.08783	8.30855	7.62758	7.47696	7.93122	8.30522	8.01681	7.64299	7.64025	7.34613	7.54464	7.86778	7.6575	7.36854	7.38038	7.46038	8.20048	7.55133	7.93978	7.63592	7.8482	8.03496	8.09089	6.92213	8.09738	7.26136	6.69058	7.4281	7.68842	7.16121	7.31216	7.30326	7.82953	7.66898	7.39242	9.36954	8.22275	7.32289	8.45864	8.21319	8.26178	6.49243
BDH2	7.7749	6.72029	8.04911	8.87282	6.97482	8.10832	7.96924	7.54935	6.05599	8.36695	7.52125	7.30625	7.58216	9.1974	7.5397	8.33293	7.84166	6.44886	8.39084	7.77756	7.25098	8.27677	7.35268	8.32115	7.84276	7.13761	7.8493	7.94391	6.14061	7.24932	7.34469	7.5771	8.19907	7.14455	7.7988	6.59155	8.54908	7.62014	7.47791	8.06666	7.94596	7.9639	7.92784	8.47715	8.6178	7.66651	8.21799	7.9366	8.01093
AGO1	8.00036	7.30079	7.20154	7.24466	7.64618	7.35471	7.71768	7.41316	7.21123	8.11053	7.38624	7.52074	6.96088	8.1911	7.51098	8.01183	7.70323	7.42931	8.57759	7.60895	7.30062	7.09251	7.19505	7.207	8.28142	8.03648	7.91719	8.3165	8.33278	7.28596	7.85709	7.63619	7.32519	6.5782	7.81	6.9982	7.29323	7.06935	7.22193	7.33766	6.82552	7.14495	8.00794	8.16445	8.467	8.3982	8.92941	9.72042	8.3278
CCDC90B	9.22387	8.89335	8.79268	9.66413	9.39012	8.72393	8.18743	9.69646	8.31618	8.84728	9.10581	9.05471	8.35451	9.46941	9.38039	7.63889	8.11158	8.42249	8.67985	9.22277	8.4058	8.42077	8.25737	8.56139	8.22653	9.18236	9.55226	9.97349	8.82524	8.95311	8.79707	10.5176	9.33997	8.37931	8.48838	8.33008	8.95741	8.8022	8.75152	8.21836	8.30764	7.96884	9.01946	9.5531	10.3619	9.85771	10.6087	9.46252	10.7149
LAMTOR2	6.51869	7.1208	7.27154	7.99389	7.24633	7.03765	6.58454	6.89207	6.30759	6.26965	6.72625	6.35565	6.63594	6.59441	6.43207	6.46455	6.44269	6.17124	6.3424	6.65314	6.34723	6.34018	6.57242	6.53623	6.32548	6.66118	6.6026	6.94262	6.75068	6.33258	6.04198	7.25486	6.03246	6.1402	5.75894	6.0466	6.69237	6.54272	6.24988	6.5542	6.01663	5.82204	7.34765	7.58953	7.60674	7.71256	7.369	6.91582	8.31972
MINDY3	7.19221	7.07023	7.22542	5.84668	8.06077	7.22379	7.52494	7.21857	7.58195	7.19599	8.28473	7.47219	7.6879	7.83756	7.36785	7.58192	7.96107	7.0032	7.74024	7.28504	6.77568	7.00971	7.17447	7.69111	7.05755	6.47305	7.01194	6.81457	7.11138	7.83174	6.67478	7.74447	7.87059	6.60153	7.31619	6.64327	7.60164	7.74487	6.91987	6.818	7.41385	6.76958	8.10767	7.37857	7.50221	8.07627	7.78486	7.95723	9.23023
PAGR1	7.92415	7.77421	7.58977	8.11971	7.84957	7.67789	7.71545	8.25216	8.29398	8.16497	8.32428	8.02106	7.9801	7.82312	7.53404	7.57214	7.89525	7.70207	8.08628	8.03576	7.78651	8.22979	8.17536	7.8328	7.82326	8.50066	8.42873	7.89255	7.97288	8.05779	7.85458	7.29564	8.19254	8.40805	8.11083	8.03001	7.35993	8.03847	8.16526	8.07774	8.08017	8.27683	8.12839	8.59594	7.99438	7.83393	8.38641	8.824	7.90617
RNPEPL1	6.72601	6.9537	6.8711	6.93535	6.78163	6.6277	6.26032	6.6994	7.34539	6.29411	6.15142	7.09892	6.93997	6.47579	6.91014	6.46578	6.5121	7.28582	6.46865	6.67508	6.73014	6.68928	6.79454	6.35878	6.40312	7.02214	6.34043	6.51313	6.67147	6.98496	6.42109	7.37509	6.80573	6.61272	7.15924	7.03732	6.81715	6.54859	6.77344	7.12006	6.66979	6.59041	7.2644	7.31176	6.92488	7.06705	6.236	6.77816	7.23956
PSENEN	7.85196	8.79277	7.98142	9.74634	8.24664	7.5194	8.10431	8.11201	8.02728	8.69182	9.49077	8.94538	8.82986	9.21393	8.54841	8.41159	8.26866	7.60722	8.6354	8.77108	7.49573	7.93699	8.28664	7.3463	7.91255	7.50987	8.54643	8.43011	7.96376	8.28776	6.40242	8.34907	8.41907	8.42832	7.50031	7.49302	7.38456	8.05812	9.66517	7.90035	7.23031	8.96603	9.14623	9.98932	11.6052	8.69149	9.4283	8.45549	9.45163
KRCC1	10.4188	10.2085	9.97205	10.7882	9.90208	10.3212	10.8325	9.80207	10.397	10.8174	9.68746	10.3647	10.3891	10.295	9.93644	9.55894	9.90704	9.79259	10.4613	9.99005	9.43928	9.85467	8.78323	9.72733	9.83033	11.0409	6.29264	10.2804	10.7865	10.3424	9.7973	10.9446	9.96567	9.46768	8.83781	8.68618	9.63531	9.41581	8.76563	9.53144	8.63334	9.3245	11.1892	9.21042	9.39208	10.6003	7.93334	11.3111	10.1667
OSBPL11	7.83028	9.29976	7.81971	8.4427	7.40314	8.302	8.3018	8.07619	8.55566	7.4815	8.21706	8.35883	8.11128	7.96757	7.99393	8.69955	8.25744	7.02167	8.62402	7.9891	8.13011	7.9228	7.3684	7.14184	7.74516	8.01523	8.77809	8.36168	7.90849	7.86434	7.60037	9.22219	7.56969	7.1406	6.84857	6.7113	7.31592	7.37601	6.68307	6.71884	7.39116	6.79768	9.41618	8.42427	9.6216	8.94272	9.11613	9.99281	9.35659
IPO4	8.14413	8.38861	8.71608	8.60692	7.88172	8.26511	7.65817	8.92255	7.89411	7.72425	8.13041	8.35451	7.97444	7.986	7.68951	8.00213	8.46361	8.42914	8.21997	7.84018	7.95505	7.80723	8.48458	8.06337	8.45957	7.31349	8.30056	8.83707	7.81678	7.67679	7.40502	7.33182	8.46196	7.9034	8.19531	7.30211	8.35516	7.76246	8.02771	7.85431	7.77904	8.10142	8.78815	8.5159	9.98598	7.56712	8.65704	9.26235	9.3135
HERC1	8.11195	8.20464	7.05997	8.52309	7.00095	8.0456	8.34984	7.32906	8.52995	7.98371	7.86433	7.99898	7.8485	8.58249	8.23926	8.28356	8.12369	7.17423	8.10941	7.98434	8.11645	8.09053	7.71182	8.61777	7.95356	6.1036	7.61019	8.04804	9.23851	8.55971	7.981	8.59323	7.83272	8.00128	8.09058	7.50138	7.62883	8.16806	7.64748	8.14668	7.4566	7.37821	8.73588	8.74662	9.04967	10.1875	9.16713	8.89978	8.30934
RSAD1	7.51573	7.73724	7.38646	7.67679	8.03118	7.21256	6.73763	7.78097	7.58708	7.72688	7.80168	7.57478	7.39074	7.43272	7.41454	7.44788	7.90452	7.61188	7.3298	7.65951	8.09272	7.10316	7.12963	7.99713	7.27866	7.36458	8.03685	7.42793	7.49976	7.59347	7.82829	7.41274	8.03403	7.64266	7.40279	7.13388	7.55342	7.53042	7.69801	7.91816	7.30216	8.22564	7.90488	7.90829	7.93336	7.56334	7.78393	7.79607	7.27917
TACC3	7.31806	6.73723	6.19543	6.41549	8.30848	6.64842	7.18559	8.89371	6.99252	6.46474	7.48162	6.25703	5.66341	7.42463	5.95266	6.56212	6.84518	6.23003	6.58254	7.22066	6.09921	5.97308	6.75883	5.49701	7.66363	7.32506	8.23632	6.70802	6.18007	6.60002	6.11351	5.90501	6.85064	5.29953	6.68121	6.05607	7.24462	6.57475	7.35139	7.40384	5.9222	6.81964	7.29644	8.56302	8.07616	7.1199	9.15566	8.0043	8.65817
CAMK2N1	5.98196	6.78218	6.77264	6.69324	5.71818	6.58898	9.6971	6.60282	5.88912	5.96866	7.04107	7.78103	7.93173	5.7491	7.30135	5.51172	5.97519	7.44527	7.43759	6.0786	6.76248	6.02837	5.21116	5.98857	6.28381	10.1846	6.77525	5.93315	9.58976	5.73559	6.82815	6.20833	5.72747	6.1285	7.14453	7.16418	6.66486	7.06506	6.46436	5.61602	6.65566	6.05657	5.81627	10.2391	6.21634	8.65692	10.727	6.28144	7.1795
MAP4K3	8.00083	8.14818	7.27341	7.88758	7.00294	7.80371	8.30813	7.43341	7.92041	9.76997	8.95607	8.78827	8.16142	8.47602	8.0126	9.72978	8.16581	6.07662	8.5914	7.39095	7.8667	6.79316	6.82584	8.56615	7.08241	7.03209	7.71184	8.09366	7.72111	7.36408	7.67884	7.87424	7.51734	8.50155	6.89519	6.34006	7.85978	7.55526	6.85846	7.04749	7.52166	7.6963	9.46583	8.63275	9.23124	8.94485	9.11823	10.019	9.10552
ZSCAN18	7.96044	7.58462	7.58952	8.06582	8.2093	7.9633	8.00848	7.95979	7.51945	8.55795	8.79019	7.86098	8.21734	9.43115	7.58603	8.99746	8.65054	7.00164	9.15286	8.31094	7.63046	7.56045	7.98281	8.54213	8.00058	7.79928	8.48603	8.93237	7.58288	7.51042	7.67987	7.93675	7.93482	8.19967	8.79085	6.36215	7.69682	7.37247	8.67155	8.50212	7.77561	7.29738	5.42635	8.29413	8.93459	9.66612	9.2356	9.01842	9.3235
GALNT7	8.43139	8.68825	7.98659	8.24501	7.45799	8.19458	7.53395	7.09337	8.13031	8.35663	8.21246	8.12341	8.6642	8.45305	6.55316	8.92517	6.30764	7.49492	8.6207	8.05123	7.01386	7.97225	7.27962	6.85689	6.3829	8.70172	7.68103	6.24825	8.44684	5.7599	7.0302	7.75896	7.67629	7.33635	7.39325	6.25202	7.36198	7.77439	7.56824	8.6384	6.8962	7.08485	9.13251	9.36195	9.7587	9.30585	11.1552	9.30317	9.34119
CDK5RAP1	7.76067	7.38035	7.24247	8.01443	7.9645	8.26893	7.64013	8.25773	8.36047	8.70614	8.16448	7.97346	7.42224	7.62706	7.44315	8.42117	7.75772	7.53647	8.17082	7.65679	7.3184	7.4643	8.28076	7.64141	7.98892	7.49971	8.51874	8.34909	7.92637	7.79445	7.51996	7.94847	7.94204	7.62289	7.65033	6.52246	7.86466	7.3418	7.63685	7.61634	7.01902	7.46487	8.77249	8.44175	8.69016	8.23518	8.88822	8.76699	8.2
TIMM9	8.18875	7.15416	8.2244	8.21657	8.22163	7.84429	7.28109	8.61943	7.33192	7.04219	7.45015	6.46243	7.66911	7.48716	7.22327	7.13971	8.09381	7.72888	7.43492	7.27063	7.07998	6.96863	7.57116	7.84909	7.45767	7.34033	7.93338	7.3794	7.74362	7.36158	8.09127	7.36736	7.16982	7.08541	7.03346	6.81739	7.25199	7.09433	7.07536	7.02927	6.60523	6.87899	8.86166	8.12083	9.03772	9.14731	7.99233	8.34951	8.54627
PELI1	8.04741	8.67454	6.76097	6.38717	6.05268	7.53059	8.475	6.51405	7.13039	7.72849	8.06311	7.75689	7.99686	7.98501	7.36783	8.71405	7.72424	6.25968	7.40106	7.88651	7.91312	7.11243	6.43775	6.94652	8.0501	7.89094	8.01924	8.40068	7.06125	7.55073	6.70551	8.41843	6.63266	6.41916	6.72248	5.44806	6.87859	7.09249	6.20212	7.12872	6.87098	7.23807	8.11252	6.7631	9.28769	8.08845	8.44761	10.3668	6.99879
NDUFB11	10.1984	10.1344	10.4686	11.6599	10.7472	10.2004	10.3317	10.3656	10.2775	9.27385	10.1996	9.01832	10.0037	10.2648	9.20433	10.1177	10.3381	9.69751	10.1851	10.3708	9.55469	10.3445	10.8176	10.0386	10.0931	10.5945	10.4771	10.9261	10.4877	9.38528	10.1159	9.80177	9.01046	10.4512	9.35286	9.23316	9.80156	9.95324	10.2338	9.14583	9.96209	9.49054	11.7933	11.104	11.3375	11.523	12.1312	11.7684	11.8512
ACSL5	9.32893	7.69917	8.03925	7.74357	6.65194	8.10253	9.55413	6.57983	8.65322	6.767	6.74455	8.66452	8.62999	6.24495	8.59612	6.16301	7.61096	7.35037	7.84523	7.44889	8.82695	7.6829	7.57378	7.58031	7.85767	7.25912	6.46767	7.22562	9.35207	7.57297	7.93937	8.6735	7.12371	7.20159	7.60667	7.05808	7.27255	7.9302	6.61651	7.95899	7.28631	7.26596	10.1287	7.40731	8.71545	8.92252	6.187	9.40891	7.52463
RHOT1	9.42283	9.58733	8.62029	9.32177	8.67996	8.97749	9.5658	9.3159	9.36997	9.87627	9.56912	9.57013	9.49015	9.71956	9.8648	10.5511	9.15216	8.92558	9.77253	9.57993	8.74551	9.15962	8.72525	8.92536	9.2436	9.42098	9.75259	9.20533	9.93016	8.9877	9.4045	10.495	8.87893	8.67176	9.05831	8.69672	9.15967	9.10563	8.94136	8.62037	8.88288	9.70344	9.97899	10.3451	10.405	10.2765	10.127	10.8495	9.64067
DIDO1	8.17357	6.79252	7.5402	6.45082	7.50896	7.28042	7.95284	7.73593	8.26939	8.18634	8.46811	8.23771	8.02804	8.53916	7.70025	8.36558	8.15625	7.88363	7.98065	8.22163	8.17921	8.42945	7.52376	8.00213	7.30454	8.46761	8.71516	7.78923	7.97467	8.17614	7.30837	8.57439	8.05908	7.92838	8.10148	7.38345	7.71592	7.88714	8.28759	7.89568	7.50123	7.90855	7.90781	8.53008	8.86792	8.9932	7.71452	8.98076	9.53962
LGR4	9.18898	9.23949	8.57528	11.113	6.5097	10.8131	8.43398	10.8843	9.93734	10.955	10.4641	8.40918	8.95406	10.9274	7.77773	9.75382	8.75071	8.82247	7.99878	9.92308	9.66181	9.06008	8.52188	10.1687	8.77669	10.0234	8.88629	7.84869	11.0495	10.4928	9.833	9.84966	9.10062	8.17489	9.60677	9.83732	9.69423	8.03716	10.2205	8.98484	8.59592	8.5309	10.7142	9.8873	10.2853	10.7374	11.4484	11.0514	9.6923
SNAP29	6.99992	7.48574	7.80125	7.7014	7.61129	7.59602	6.25784	7.26642	7.95564	6.99936	6.98256	6.7694	7.03949	7.63943	7.61398	6.49706	7.08417	7.53717	6.78882	7.36388	6.80109	7.37522	6.8839	6.86037	8.28316	6.92777	6.52501	8.25344	7.04012	7.37194	6.70248	7.64368	7.61552	7.31731	6.57531	7.06945	7.85775	6.59714	7.30398	6.63748	6.60322	6.9311	6.89276	8.06716	8.36666	7.95398	7.86219	7.93002	8.79858
COQ4	7.75407	6.78496	6.64104	7.28028	7.54056	6.8806	6.97313	7.18837	6.85116	7.15296	6.91162	6.80622	7.50463	7.85621	6.64886	6.87236	6.7662	6.88226	7.07908	7.44627	6.86643	6.89842	6.83893	7.38429	6.85947	7.43081	6.81437	7.34699	7.29842	7.41167	7.28019	7.44641	6.89996	6.55176	6.88984	6.89361	7.80201	6.48039	7.23065	6.60061	6.47066	6.26622	7.43986	7.56592	8.39492	7.59627	8.42991	8.30609	8.39503
PRDM4	8.79078	7.5045	7.68625	8.59058	8.11728	8.11235	7.90496	7.72268	8.14089	8.30762	7.91709	7.93805	7.88378	7.9296	8.19556	8.90497	7.94372	7.66886	8.44422	7.84836	7.7698	7.44239	7.8357	7.72149	7.71994	8.14147	8.54966	8.24983	7.7833	7.77517	7.23713	7.8069	7.8339	7.06039	8.18355	7.61447	7.88719	7.775	8.09435	7.53323	7.84321	7.75785	8.78291	8.38312	8.25222	8.41647	7.88175	8.99564	8.79455
NAV2	9.12552	6.3694	7.26727	7.18415	7.3283	8.27952	8.11398	7.16175	7.75518	7.78606	8.75796	8.76408	7.56656	8.09618	8.03989	8.60524	7.20593	8.09802	7.83709	8.24257	7.65913	6.9389	7.88142	6.83493	7.14592	9.76735	10.2303	7.49126	10.1492	6.51073	6.95941	8.52002	6.71873	6.35334	7.43349	7.48895	8.51181	7.69195	8.1233	8.76286	7.88454	8.1235	9.20856	8.40918	7.92397	8.00087	10.5109	7.79998	8.22807
FAM208B	9.7281	9.34622	9.14388	10.6261	9.50017	9.19235	10.1734	9.08458	10.0539	10.9998	9.47929	9.72684	8.79539	9.04665	9.56466	9.27414	8.95531	8.97134	9.92194	9.33697	8.42595	9.14996	8.80556	8.78334	8.91862	9.06272	10.0813	9.67036	9.76717	9.65716	8.17179	10.6362	9.32622	8.34807	8.50842	8.16115	8.87729	9.07655	8.83809	9.20405	8.56853	8.78325	10.0733	9.8121	10.4213	10.4598	11.0734	10.4043	10.7142
BEX1	7.94858	6.87626	7.22749	7.42138	7.29919	7.42055	7.24707	7.23993	7.0894	6.94497	9.58551	7.78715	7.69481	6.4564	7.24512	9.17274	10.176	7.41148	8.57139	7.02833	7.32618	7.39213	7.92374	7.10144	7.04915	6.69465	9.31924	6.73346	6.96945	6.60798	6.76846	9.34049	7.34773	7.23818	8.92968	7.70311	6.86884	6.60718	6.84293	6.62701	7.1806	7.07825	8.38017	11.2198	8.12573	6.56176	11.0205	6.31795	7.04061
THOC7	10.1624	9.69213	8.78883	10.9542	9.55922	10.0222	9.9418	8.97141	8.7554	9.79183	10.0548	9.36649	9.69982	8.93147	8.88146	9.48189	8.63612	9.10515	8.62729	9.40093	8.90094	8.76492	9.42439	9.00307	9.33047	10.5946	8.50862	10.1233	10.3026	9.50413	9.27327	10.6119	9.13991	8.3608	9.09608	8.68196	9.20584	9.02164	8.48897	9.18363	8.30757	7.5833	10.1104	9.9496	11.0913	11.0176	8.81589	10.1649	11.0679
PFDN2	9.54878	9.33044	8.45027	10.0357	9.29417	8.67591	8.69021	9.06628	8.91391	9.71374	9.12252	9.27915	9.24308	9.6502	8.76183	9.7178	8.79394	8.69665	9.22995	9.29114	8.35027	8.46254	8.30246	9.04514	8.64801	8.95928	9.88203	9.50379	9.16277	8.60606	8.02688	9.52336	8.69043	8.25009	8.62955	7.92228	8.73084	8.51124	8.01145	8.61485	8.29279	8.2329	9.4672	9.77976	10.0371	9.60597	9.89719	9.85163	10.8376
FAM160B2	7.66773	7.56647	7.715	7.45879	7.68298	7.64667	8.02045	7.48482	8.32377	8.2804	7.64896	7.98317	8.37693	8.02103	7.84818	8.35984	7.48308	7.82688	8.02141	7.86592	7.60686	7.5646	7.54823	8.19774	7.52205	7.91232	7.98882	7.90176	8.67799	7.83932	8.60065	8.03741	7.48068	7.19191	6.97182	7.75763	9.01555	8.14706	8.00249	8.9041	7.63442	8.29316	8.21705	8.51559	7.71723	8.73123	8.49658	8.08686	8.64514
MRPL22	8.22869	8.74999	7.73798	9.20958	6.86177	8.18467	8.68073	8.76862	8.403	8.07462	7.74391	7.59935	7.8506	7.92784	8.96249	7.93564	8.4694	7.40117	7.95549	8.02274	7.91676	7.89389	7.20931	8.39581	7.81057	8.47442	8.46392	8.72564	8.44226	8.6691	8.16155	8.36208	7.74327	6.91422	7.41253	7.72264	7.48704	8.04792	7.70595	6.79116	7.70819	7.93156	9.31725	9.44956	9.64298	8.8853	8.88084	8.52808	9.80118
PPCS	9.74018	8.66617	7.98754	8.62415	8.493	9.09247	9.05137	8.17102	8.42668	9.01848	8.59296	8.60449	8.13535	9.69513	8.4844	8.83393	8.5907	7.84838	10.8083	8.22607	8.03754	7.42982	7.86755	7.39097	9.52535	9.25209	8.19429	9.18201	9.31903	8.72226	9.21351	9.17046	8.52681	7.85876	8.18296	8.16346	8.57841	7.596	9.01556	7.48463	7.33278	7.73347	10.268	10.7392	9.98648	9.92754	9.44355	10.7009	9.44335
ERMP1	8.45639	9.34543	8.38199	8.63075	9.13557	8.63281	9.70327	8.51171	8.87087	8.83413	8.55303	8.76507	8.3925	8.97867	8.15881	9.33479	8.77916	7.92092	8.03937	8.60275	8.1636	8.09795	8.52908	8.12527	9.0736	8.41566	8.35609	8.96088	10.0388	8.42047	8.55926	8.29836	8.55888	8.61831	8.39821	7.43608	8.78131	8.55661	8.47425	8.53801	8.51113	8.77098	9.78381	8.48756	9.62195	9.22651	9.47573	8.89202	9.0629
GTF3C3	7.02528	8.75311	7.2861	8.2463	7.97364	8.41232	7.74186	7.65083	7.36402	7.53421	7.20297	7.09171	7.6334	8.16633	7.16458	8.01718	7.38946	7.30041	8.12457	6.56742	6.35903	6.71078	6.92278	6.7879	8.27254	7.50522	7.67495	9.03084	8.38558	7.69865	5.93828	6.96498	7.75928	6.93097	7.80526	6.13256	6.74136	7.33429	7.1103	7.32666	6.89623	6.5912	8.68342	8.19266	10.1048	8.9561	8.63936	9.06102	9.78575
TMEM176A	8.21746	7.64354	8.77995	8.03879	8.25494	8.09261	8.23723	8.25201	7.6808	7.79656	9.36733	7.73456	9.0063	7.9724	8.30462	7.81822	7.86552	8.16145	7.51819	7.62791	7.97246	7.97738	7.66492	7.41401	7.85238	7.5425	7.80499	8.33242	8.60408	7.61141	7.98068	8.64669	7.62689	7.97805	7.36879	8.74657	8.02357	9.2387	7.31456	7.77235	8.56953	8.50388	7.29904	10.3504	8.10442	8.11538	8.22051	8.31899	8.26056
SESN1	6.88046	7.10018	7.4172	7.42224	7.15829	7.25044	6.98512	6.53375	7.09533	7.16089	7.29662	7.17836	7.9213	7.42374	7.69724	7.30049	7.09474	6.87241	6.91893	7.34389	7.22597	6.58096	7.12465	6.57092	6.95952	7.37397	6.74497	6.82184	6.40152	7.366	6.5839	7.32507	7.38631	6.80837	7.7523	6.90075	6.74143	7.73878	7.04681	6.8043	6.63009	6.33504	8.39912	6.76739	8.26627	7.80824	8.10428	7.98396	7.39773
TYW1	8.52933	8.49165	8.47952	8.19257	8.42772	8.45338	8.09771	8.16598	8.40736	8.04656	8.20902	8.8156	8.58781	8.15918	8.13749	8.48749	8.58706	8.2608	8.56208	8.08953	8.55006	8.25034	8.56647	8.65346	8.19412	8.44126	8.14737	8.72669	7.86963	8.69906	8.44471	8.0743	8.5829	8.77498	8.67003	8.29462	7.92657	8.20348	8.11446	8.13469	8.42041	8.24739	8.84147	8.5212	8.57384	8.23657	7.96077	8.63743	8.5763
ZC3H7A	8.05843	8.16808	7.101	7.97271	7.4336	7.64024	7.39882	7.56437	7.47736	8.14831	7.34025	7.41747	7.96593	7.70731	7.77333	7.5606	7.3994	6.8504	8.28492	7.06625	6.78621	6.71876	6.56831	7.37966	7.33871	7.73316	7.16699	7.07878	7.71616	6.85772	6.99603	7.17183	7.59398	6.52825	6.98115	5.68668	6.50241	7.24399	6.65979	7.78459	6.60145	6.48366	8.69413	7.61999	8.32642	7.59077	8.67687	8.20003	7.96451
GMNN	9.20311	9.58077	9.57378	9.73774	10.537	9.03995	9.45095	9.78478	9.96992	10.2234	9.83789	8.24033	7.01041	10.4106	9.08098	11.4888	10.3085	8.49131	10.1169	9.02192	8.31865	9.72179	8.98792	8.62229	9.47611	9.13366	10.056	9.6015	8.23589	9.72507	9.91907	9.35328	9.78346	8.30072	8.9598	8.6805	8.87654	8.69531	8.87698	8.09252	8.93451	8.78373	8.97491	9.89227	11.0919	9.52472	11.714	10.7943	10.6117
COMMD8	8.44682	9.48427	8.69213	9.90602	9.43601	9.15927	8.55042	9.07911	8.16829	8.39189	9.69842	7.97262	8.86635	10.2672	9.35474	8.96385	8.68137	7.8083	10.5436	8.45311	8.15532	8.42381	8.15845	7.52726	7.84311	9.29467	9.40761	9.56765	8.79322	8.63858	8.88602	8.78357	9.00716	7.94203	8.30182	8.02852	8.90806	8.51768	9.15438	7.38131	7.85477	7.63583	9.36656	9.14592	10.6522	9.13271	9.68424	9.97047	10.8624
RCBTB1	8.37582	7.926	7.13921	7.70497	7.85391	7.52736	6.66381	7.99178	8.43889	8.95808	8.49795	7.96367	8.61525	8.5524	7.79019	9.69797	7.44843	6.63122	7.75263	7.65184	6.25759	7.85626	7.48913	7.70186	5.83831	7.04529	8.59405	7.70819	8.70461	6.32709	5.76005	8.24479	7.03997	7.33524	6.92864	5.6818	8.43438	7.49946	7.13294	8.25936	7.43588	7.13061	9.11115	8.27226	7.77491	7.60471	8.81136	8.77055	8.55692
TRAPPC2L	7.46281	7.41791	7.91772	8.7245	7.989	7.27038	6.59933	7.17208	7.12778	6.83496	7.65526	7.44783	7.52063	7.57564	6.92592	7.28348	7.01671	7.47009	7.76814	7.28588	7.04626	7.71893	7.22742	7.59567	7.12426	7.29555	7.54634	7.85928	6.92049	7.60716	6.97885	7.39946	7.17213	7.33409	7.59873	7.53563	7.24342	7.15077	7.17195	6.99116	7.69363	6.71271	8.41666	8.3041	7.83697	7.55305	7.92209	8.11528	9.47462
KIF4A	7.34561	7.45408	6.88649	6.94492	7.94968	7.42185	7.06412	7.97916	7.36183	7.4757	7.50504	5.9744	6.66117	7.0662	6.48408	7.17713	7.38663	7.17938	6.39539	7.02478	6.09631	6.36742	7.62781	5.69577	7.45861	7.70095	8.69379	7.48776	6.26161	6.51857	6.88059	6.21584	7.36689	6.02884	6.85341	6.50833	7.57286	7.05294	7.91373	6.69696	7.06304	6.70837	7.32605	7.98158	8.3867	7.85687	8.09317	8.63979	8.48331
MRM2	9.44711	8.98159	9.13365	9.60603	7.68822	8.49432	8.75021	8.71991	7.97541	9.10541	9.19166	9.21104	9.13422	8.76784	9.03876	8.71766	8.52172	8.96682	9.26705	9.23764	8.62316	8.02156	8.49137	8.3725	8.86577	8.37914	9.59783	9.40424	8.14063	8.30975	8.49876	9.01039	8.30026	8.80609	8.4474	7.61155	9.20972	8.23747	8.36667	8.53449	8.33846	8.39722	10.3304	9.93581	9.57023	8.88175	10.6277	10.6102	9.69289
TIMM8B	11.8451	11.3545	11.0157	12.0888	11.155	11.2404	10.6457	11.4022	11.2173	11.4819	11.1484	10.768	10.3393	11.54	11.2396	11.1332	10.3125	10.7973	10.912	11.3193	10.3379	11.104	11.1999	10.8361	10.8647	11.5109	11.9423	12.0067	11.75	11.5291	10.3984	11.8125	11.0707	10.5278	10.9951	11.1425	10.6433	10.7041	10.7444	10.5129	10.7399	10.4145	11.7027	11.6674	12.3471	12.2267	12.4706	12.0694	12.535
CRELD2	10.2594	10.1114	8.695	9.5819	8.63744	8.73217	9.20937	8.90069	8.84884	9.45097	8.8161	9.38904	9.25976	9.24086	9.89357	9.0059	8.80892	8.54249	9.24647	9.06756	8.75198	9.35102	8.69647	8.45924	8.90505	8.92326	9.24557	8.7947	9.85954	8.49433	8.67208	9.96937	8.96446	8.73102	8.27988	8.79558	9.44333	9.32242	9.30591	9.03576	8.67245	8.90649	9.76946	10.2195	10.5335	9.93029	9.1529	9.46047	10.0798
NRSN2	6.57743	5.91282	6.78109	6.58549	5.89341	6.41742	6.50041	6.13226	6.13499	6.58954	6.39626	6.13237	6.35406	6.50788	6.42991	6.3105	6.35817	6.48952	6.50456	6.41787	6.4864	6.55037	6.27099	6.40751	6.35011	6.50064	7.12579	6.52648	6.21129	6.59677	5.84094	6.09353	6.59517	6.68104	6.45238	6.13343	6.15181	6.41803	6.33165	6.44975	6.49441	6.53916	6.70247	7.31963	6.74673	7.31563	7.08133	6.57314	7.45301
GOLPH3L	9.07028	9.04869	8.43121	10.0192	8.63017	8.9415	9.14721	9.95286	8.9166	8.91039	8.97657	8.99041	9.58461	9.37918	8.94638	9.96769	8.65279	8.62819	9.61139	9.3802	8.61971	8.50848	8.2958	8.8404	9.19241	8.87041	8.46362	9.58416	9.01899	9.02919	8.75093	9.17331	8.96686	9.08777	8.36896	7.83295	8.34619	8.50793	8.74762	8.91797	8.25809	8.52523	10.1968	9.90563	10.3249	9.94684	9.49107	8.95067	10.4535
EXD2	8.37673	8.61541	8.30267	8.17034	8.33157	8.37813	8.32617	8.77564	8.38512	8.04281	8.66955	8.37813	8.05343	8.23096	8.30923	8.61255	8.70161	8.26582	8.45281	8.14658	8.04741	8.42734	8.5214	8.52519	8.40526	7.3869	8.52948	8.19642	7.68799	8.23679	8.33759	7.68826	8.29631	8.37813	8.62284	8.55634	8.35348	8.45744	7.98279	8.11426	8.3693	8.52033	9.31932	8.03923	8.56793	8.74555	9.02194	7.38087	8.33311
LRRFIP2	6.90497	6.72063	5.94773	6.92056	6.64553	7.06061	7.83546	6.39415	7.21627	6.95693	7.17863	6.98483	6.68261	6.9427	6.92825	7.08373	6.21113	7.12704	6.19451	6.36178	6.86154	6.1259	6.30004	6.29133	6.75266	7.77357	6.33886	7.18058	7.20728	7.08584	6.1788	6.94347	5.94786	6.04953	6.18867	6.27194	6.78005	6.3373	6.46047	7.82283	5.85769	5.74394	6.95473	7.26472	6.95062	7.93245	7.1578	6.69258	7.52243
DARS2	6.66854	7.096	7.19743	7.05816	7.02272	7.26678	6.86558	7.06872	7.36041	6.50516	7.16135	7.23975	7.0281	7.0464	7.12827	6.86853	7.16052	7.66707	6.966	7.00563	7.30229	6.986	6.93172	7.22152	7.0438	6.7596	7.2369	6.62003	6.54592	7.05758	6.77908	6.49184	7.65532	7.28905	7.17332	7.24127	7.0185	7.03412	7.31448	6.9279	7.57636	7.32359	6.38238	6.82117	6.95771	6.552	6.11871	6.62424	7.24919
USP21	7.90393	7.80308	7.51733	8.55246	7.73896	7.53401	7.75686	7.6179	7.93121	8.1885	8.52658	7.917	8.23205	8.24751	7.73733	8.60693	7.77444	7.55561	8.64942	8.14737	7.56771	7.4578	7.4735	8.10928	7.91261	7.57547	8.60544	7.87904	7.81428	7.75173	7.46281	7.94323	7.70999	7.54882	7.56395	7.13954	7.82702	7.79816	7.84195	7.9243	7.84901	7.3927	9.01793	8.51707	8.96214	8.66015	8.62507	8.47947	9.48218
TNFRSF12A	8.52133	8.6753	8.26428	7.79887	9.00015	7.39886	7.81823	8.77942	7.4615	7.93208	7.6597	8.35687	7.79507	7.49033	8.08269	7.44995	8.0249	8.19775	8.07907	7.00727	7.11112	7.44137	7.68037	6.48659	7.13417	9.44663	8.87119	7.4838	6.99238	7.50152	6.59773	8.93376	7.8732	6.76931	7.88152	7.40999	7.95082	7.40006	7.48853	7.29076	7.57891	7.79608	8.7608	9.16259	7.83925	8.60642	9.22365	9.24044	8.26766
S100PBP	7.81744	7.77555	7.74005	8.01087	8.01765	7.57532	8.48739	7.91985	7.9733	7.29483	8.08456	7.61624	7.65384	7.74498	7.90111	7.88548	7.76367	7.78401	7.00855	7.25156	7.56793	7.65762	7.24851	7.316	8.28316	8.24316	7.8539	8.25261	8.82951	7.5229	7.37286	8.1765	7.4236	6.36844	7.39831	7.66557	8.38743	7.80192	7.02228	6.91238	7.51478	7.32378	8.23198	7.24768	8.39014	8.87208	8.57799	7.73648	8.4377
MED9	6.36104	6.74428	6.37003	6.24397	6.22347	6.68617	6.21876	6.28261	6.71572	6.23321	6.35328	6.41528	6.56585	6.66772	6.25873	7.03942	6.5798	6.10166	6.54533	6.15223	6.10764	6.50903	6.12572	6.70262	6.88601	6.06057	6.77205	7.09066	6.97755	6.49516	6.63102	6.09516	6.56954	6.33201	6.42109	6.44741	6.04802	6.29703	6.50649	6.06606	6.25607	6.33991	7.0147	6.84443	6.73464	6.57675	6.83802	6.78358	6.7809
AKTIP	7.87921	7.97723	7.71203	6.98696	7.55168	6.55472	8.57228	7.79405	7.63549	7.66295	8.12194	7.82808	7.26349	8.09496	7.66788	7.43476	7.66533	7.0155	7.8792	6.65746	6.9146	7.34285	6.4574	6.90638	7.08745	7.78086	6.49357	7.85385	7.47674	6.82089	6.63414	7.11546	7.26697	7.19801	7.05985	6.66673	7.06295	7.15917	6.51864	6.61704	7.16263	6.63991	7.65733	7.74115	8.089	7.84573	10.0049	9.21477	8.59548
NUDT9	9.55525	9.53331	8.68879	8.62783	7.7378	8.86209	8.02424	9.3479	7.9418	9.14546	8.33521	8.43559	8.56882	9.13598	8.69892	9.09538	8.64579	8.45135	9.2094	8.8405	8.05043	8.97248	8.03313	8.86082	8.74233	9.40159	8.88369	8.76485	9.47676	8.0617	7.64524	9.2772	8.85843	7.99646	8.19364	7.56706	8.98778	8.50984	8.46844	8.629	8.7048	8.40952	9.17548	9.67537	10.2611	9.59136	10.3975	9.76496	9.32034
MICAL1	5.81459	5.8575	5.78901	5.80913	5.79965	6.22802	5.62026	5.58595	5.60141	5.4022	5.50657	5.79333	5.89222	5.71755	6.12184	5.61838	5.52195	6.06985	4.9904	5.6067	5.5218	5.91182	5.993	4.9632	5.54743	5.50168	5.37229	5.89365	5.72468	4.95399	5.95107	6.64414	5.66292	5.66671	5.62617	6.2042	6.27769	6.56998	5.53659	6.75468	6.06629	6.25957	6.24767	6.93658	6.58293	6.54378	6.80677	6.68137	6.38165
RWDD2B	8.51505	8.62401	8.53907	8.09778	7.97492	8.46932	8.66306	8.26706	8.16586	8.29417	7.69766	7.47191	8.74396	8.42203	8.25385	8.17403	8.56992	7.39704	8.68683	8.524	8.56883	8.16393	8.27262	8.13588	8.29313	8.16823	7.60802	8.48286	7.96138	8.04916	8.203	8.41053	8.41617	8.31264	8.45879	8.00719	8.54732	8.44424	7.27465	9.0368	7.61175	8.27295	9.24726	8.48485	8.84319	8.45598	7.25465	9.62983	9.20033
RBM7	8.75684	8.31167	8.81298	9.51296	8.47697	8.35322	7.8181	8.49358	8.79158	8.15657	8.79022	8.63199	8.58323	9.40084	8.79005	8.39856	7.89656	6.77465	8.51461	8.1936	7.34423	7.8274	7.97297	7.57236	7.20329	8.55806	7.85976	8.39988	8.70763	8.2677	8.18988	7.52495	8.62595	8.24114	7.64056	7.21077	6.96921	7.68073	6.65203	6.77624	7.03779	6.89851	10.3127	8.57696	10.1341	9.8644	9.38638	9.35449	10.4706
LOC728392	6.76018	6.71253	6.62697	7.10498	6.08864	6.34374	6.44084	6.30488	6.57329	6.37417	8.02527	6.49903	8.32058	6.15394	6.4666	8.34823	6.85623	6.86664	6.0106	6.46986	6.76541	6.54024	7.27882	6.94181	6.1643	5.52367	8.37821	5.99721	5.83553	6.30169	6.74481	7.31823	6.34574	6.66033	6.98649	7.02468	6.44381	7.24235	7.3134	6.37958	6.8676	7.44799	5.92104	7.14597	8.5696	6.51787	9.61064	7.8427	6.45188
U2AF2	8.9623	8.66026	8.56383	9.54411	8.62856	9.19465	9.16669	8.73829	9.07292	9.27528	8.79165	9.08516	8.66554	9.31484	8.96778	9.61031	9.1398	8.63097	9.2702	9.34287	8.3814	8.85518	9.15636	8.64662	8.90658	9.18502	9.611	9.6556	9.0169	9.07736	7.79412	8.86035	8.52766	7.91997	8.68277	7.81501	8.70596	8.67147	9.3271	9.47417	8.32936	8.1669	9.92183	9.49418	10.2811	9.40545	10.1135	10.2292	10.4039
MRPS18A	8.89359	7.79056	7.88355	9.21714	8.05081	8.61178	8.06784	9.19767	7.99871	9.3364	7.46131	8.47388	7.77814	8.58564	8.41809	9.28811	8.4429	7.81497	8.7614	8.3527	7.97777	8.54441	8.02399	6.93584	9.2069	8.96791	10.2083	9.19569	8.42925	8.09924	8.05539	8.40131	8.35261	7.62236	7.98112	8.61623	8.65028	7.47852	7.98225	7.65769	7.53008	7.75918	8.70897	9.81105	9.082	9.39246	9.46754	9.7395	9.59987
USP16	8.7583	9.3492	8.03065	7.80537	7.56021	8.58718	8.43904	8.51605	8.22255	8.83419	8.21631	8.68539	8.50146	8.72566	8.65168	8.38131	8.51071	8.40741	9.31345	8.11297	8.07162	7.86808	7.40595	7.31038	7.38169	8.47418	8.51138	8.69076	7.77724	8.41286	7.70098	8.16273	8.47895	7.96842	8.66609	7.20651	8.19953	8.13631	6.45133	8.50584	7.42781	7.34437	9.61498	8.35269	10.2909	9.87846	9.02756	10.7753	9.39017
PGLS	8.19962	9.07633	9.30706	10.4947	9.55502	9.18544	8.19057	9.53665	9.43477	8.82675	9.11667	9.55601	8.73338	9.36014	8.97611	8.55665	8.35779	8.45313	8.83722	10.4464	8.72116	8.58486	9.16823	9.88526	9.65443	9.50404	7.90014	10.2691	9.21418	10.0055	9.06274	9.54542	8.83845	8.92973	10.1164	9.03157	9.02717	8.86039	9.88274	9.76285	7.71314	8.43426	10.3708	11.0982	11.0151	9.54512	11.032	10.6466	10.6093
APH1A	10.6199	10.1936	10.331	11.0729	9.54736	9.99133	10.2596	11.504	10.3688	10.9289	9.60356	10.9314	10.063	10.2658	10.3349	10.8063	10.0248	9.68506	10.6786	10.1274	9.64209	9.72852	9.38049	10.0776	9.92456	10.1078	10.331	10.5955	10.4431	10.3177	9.26076	10.2131	9.77593	9.939	9.61832	8.94607	9.98898	9.47184	9.44652	9.68072	9.25883	9.79392	11.5852	10.7581	10.9428	10.773	10.9431	10.7933	11.1876
SNF8	8.27125	8.47933	7.17225	8.17552	8.60966	8.16907	7.66146	8.79375	7.66876	8.56829	8.12388	7.77396	7.5158	8.95132	8.43741	9.08822	8.7084	7.34654	8.17696	7.44717	7.90941	7.60556	7.71589	7.39254	7.76102	8.12547	8.60093	8.53437	7.62826	7.40038	7.79243	7.82653	9.14384	7.55595	7.51539	7.23248	7.60706	7.77443	8.1523	7.35571	7.34399	7.89218	8.82654	9.48642	9.40149	8.34928	9.56187	8.28803	8.44723
SFXN1	7.49132	7.8721	7.05881	6.91991	6.84033	7.43301	8.33	7.97123	7.30808	8.2646	7.24949	6.91379	7.61892	7.35041	7.67251	7.43304	8.09511	7.75647	8.22665	7.27102	7.46812	7.67049	7.02878	7.5849	7.45145	8.50681	8.09663	7.65258	8.06802	6.16867	7.86838	7.57594	7.39925	6.55039	6.8402	7.34764	7.91101	7.36842	7.40017	6.71918	7.10351	6.93069	8.16688	9.3928	8.57256	8.94352	8.68759	8.13619	8.5952
ROGDI	6.48999	7.43458	7.03978	6.42184	7.0792	6.38555	6.43386	7.19256	6.20304	6.43238	6.50638	6.31504	6.509	6.76411	6.51272	6.16728	6.29709	7.09767	6.35251	6.24258	6.86688	6.96887	7.52149	6.67957	6.48123	6.93573	6.80854	6.72716	6.72716	7.01	6.72074	6.8087	6.75367	6.40911	6.22844	6.72716	6.2835	6.64863	6.25006	6.84324	6.56511	6.53444	6.51002	6.74091	6.55274	7.19386	7.20109	6.79914	6.46885
ACTR6	9.19072	8.40988	8.13486	8.62237	8.3749	8.84453	8.00842	8.16345	6.65701	9.38356	8.27409	7.89559	8.80514	8.4416	7.97003	9.45365	8.2041	7.16674	9.33655	7.47645	7.01589	7.35945	8.0652	7.52821	8.63825	8.77428	9.5982	8.84773	8.14987	8.18604	8.48982	7.43881	8.49803	7.70276	8.19642	6.62503	7.20001	7.67813	8.30705	6.43283	7.60085	6.8269	9.54696	7.8627	10.6888	9.75177	9.26762	10.6912	9.93609
VPS13C	10.1595	8.6239	6.78836	7.75039	8.34174	8.6962	9.53235	6.71453	8.71459	8.42142	8.07251	8.72453	9.17887	9.21725	8.79441	8.06909	7.4588	7.79253	9.25734	8.17622	8.56695	7.35485	7.89359	8.88247	8.02387	7.72333	7.23183	8.15189	10.1561	8.94924	8.58738	9.78738	8.13133	8.22662	8.848	7.19254	8.01803	8.16679	8.7517	8.56438	6.81478	7.84682	9.79651	8.47206	9.63642	10.433	9.81477	9.56929	8.65604
FANCL	9.06183	8.69164	7.72298	8.06332	8.28737	8.52614	9.92951	8.35724	8.52178	9.39991	8.9833	8.66675	8.84756	9.1528	7.82923	9.68532	9.04453	7.39264	9.23791	8.74448	8.80678	8.30066	7.65262	8.78774	8.11927	8.5486	9.72336	8.83342	9.88301	7.91311	8.43046	9.08409	8.71819	6.91396	8.23232	7.11092	8.84745	8.34023	8.10056	8.12673	8.15099	8.22101	8.91237	9.60878	9.84452	9.79666	9.94554	10.1037	8.78129
MRPS30	8.49276	8.0629	7.69754	9.46405	9.45541	8.72773	7.51384	8.17124	8.33388	8.83105	7.75063	7.83453	7.98799	8.95958	8.20955	8.53429	8.20671	7.20646	8.82758	7.81675	6.5127	8.18793	8.15735	8.09459	8.63058	8.76986	7.87807	9.36044	8.38969	8.6449	7.68707	8.1049	8.733	7.56923	7.56116	7.03124	7.37508	7.71951	6.64945	7.34321	7.36758	6.993	9.26937	9.54119	10.2861	8.60821	9.3888	9.49166	10.3008
CDCA4	8.24726	7.90937	8.19579	8.90787	8.58944	8.70246	8.81459	8.7613	7.96827	8.58553	8.07029	8.13432	7.69973	8.84167	7.94018	8.35718	8.6853	8.47841	8.17145	8.43854	7.65587	8.33928	8.51674	7.98505	7.60357	8.67164	8.67627	8.08666	7.45721	8.75594	8.12018	8.11752	7.66664	8.57966	8.41683	8.29517	8.18655	8.05674	7.77142	8.1113	8.44374	8.27776	9.70524	8.63849	8.57956	8.64323	8.43415	9.84193	8.86707
OAS3	8.60894	7.79791	6.98479	5.56739	7.69874	8.46913	7.31601	6.74955	9.07014	7.02334	6.35114	6.67443	6.75685	6.29503	7.95514	6.04177	7.16887	6.23986	7.4765	7.79392	7.72635	7.349	7.29198	7.19304	8.80487	6.50366	6.36812	6.99349	7.80911	7.38311	7.63901	7.11931	6.94448	7.1491	7.1728	6.85894	7.67155	6.55487	6.73821	7.20318	6.69785	7.09531	8.18963	8.95845	9.00386	8.50676	6.79459	8.54394	7.05437
HPS4	6.26829	6.85246	6.45486	6.74771	5.91516	6.41066	6.44607	6.0148	7.2091	6.61582	6.53679	6.26139	6.88675	7.10051	6.86239	6.86825	6.4334	7.08987	6.45958	6.30402	6.38983	6.63856	6.24288	6.88694	6.66459	6.29872	6.36355	6.54785	7.25944	6.51994	5.87171	6.85849	6.76853	6.72185	6.44719	6.4551	6.54126	6.45989	6.937	6.49413	6.35356	6.27648	7.21175	7.05699	7.37384	7.04184	7.78658	7.22051	7.14964
TRIAP1	9.65765	9.08167	9.3555	8.99327	9.51775	10.5955	9.05622	9.1609	9.26504	10.4883	9.40638	9.02225	9.56765	9.958	9.42276	10.4498	9.7625	8.68136	10.6201	9.00397	8.77473	8.92374	9.70022	8.5344	9.16944	9.65765	10.2777	9.47879	8.99768	8.68332	9.92849	8.83032	9.45213	8.71286	9.25656	8.36171	8.72756	9.15592	8.87734	8.55955	8.71916	8.66715	10.3789	9.87024	10.8729	9.8411	11.2599	11.7969	10.5827
SNX10	8.29188	8.29147	7.32712	6.37922	8.42196	8.06591	7.48878	7.70508	7.02424	8.16454	7.49995	7.15122	6.78857	8.52941	7.13967	7.27073	7.25397	7.70392	5.95961	7.80988	7.66424	7.93388	7.47859	5.03383	7.44192	8.02328	7.30911	9.67742	6.72804	7.59623	8.50603	6.90504	7.19959	7.4004	6.93851	8.21767	7.5338	8.77837	5.95397	7.14751	7.198	7.76835	7.36682	8.72141	8.79217	7.5346	9.22736	8.34648	8.16198
ABT1	8.08111	7.65351	8.10817	8.4216	8.20261	7.87804	7.26949	8.19581	8.34968	7.71481	7.59042	7.6895	7.53405	8.46616	7.61047	8.51158	8.1048	7.53307	8.00558	7.57442	7.96067	8.07385	7.70056	8.0257	7.61727	7.16275	7.97111	8.33602	7.35406	8.45495	7.65104	7.66669	7.9249	7.46136	7.71366	7.59432	7.32891	7.50187	7.63953	7.36786	7.34433	7.05802	7.69394	8.26026	8.11814	8.05899	8.94907	8.26854	8.73167
NENF	8.46398	8.91986	8.59019	8.91203	8.23677	8.28934	8.43546	8.04052	7.99521	8.05742	8.0507	8.38307	8.50878	8.37848	7.893	8.03868	8.00356	8.33004	8.41642	8.93095	8.01825	8.33174	8.34095	8.92618	8.01951	8.62708	8.51619	8.57285	8.59682	8.24562	8.11537	9.26249	8.36669	8.66207	8.50529	8.35959	8.33548	8.45458	8.81183	8.40168	8.22454	8.26563	9.76266	9.99332	9.47346	9.4042	8.72429	9.04285	9.53628
MBIP	7.77197	7.83648	8.17186	8.67822	8.12907	7.68998	7.48697	8.62273	8.36589	8.56055	8.72929	7.46611	7.16814	7.64789	7.11883	7.81931	7.84626	7.59192	7.99036	7.04464	7.07876	7.26617	7.31043	7.36747	7.13937	7.04713	7.51871	8.6283	6.60389	6.89021	7.2881	7.47927	7.06921	6.12687	7.2892	5.94802	7.72758	7.45072	7.19794	6.76111	6.83954	6.48136	7.41084	7.88681	8.03172	8.12291	10.2337	9.01112	7.51082
GTF2IRD1	7.80265	7.72779	7.79683	8.92192	8.10444	8.11127	7.46314	8.06609	7.54321	9.05074	8.0549	8.3583	7.87206	9.20766	7.92446	8.67389	8.22432	7.93379	8.01547	7.82116	7.66397	8.12015	7.94992	7.91795	7.8302	8.11127	8.29022	8.8691	7.70799	8.38867	7.14643	7.84325	7.76412	7.68927	7.66735	6.94832	7.5498	7.32949	7.51681	8.24377	7.54045	7.78843	7.50631	9.56634	7.84501	9.61128	8.89586	8.94033	9.37358
NDE1	7.33818	7.46961	7.33106	7.52523	6.89364	7.25378	7.22249	7.6209	7.18373	7.58937	7.15261	7.599	7.16724	7.578	7.38916	7.02869	7.08247	7.57755	7.42226	7.27254	7.17964	7.42972	7.22036	7.17853	7.43638	7.98998	7.57663	7.49634	8.00603	7.54243	7.55348	7.03174	7.15057	6.81193	7.47768	7.29205	7.45405	7.32843	7.28673	7.73402	7.08931	7.45726	7.49634	7.93108	7.85666	7.51976	8.89113	7.9398	7.75413
KANK2	7.86434	8.32037	8.25029	8.61727	8.3766	7.94892	9.95801	8.6981	8.13197	9.62398	8.92434	8.15019	8.30986	9.33164	8.54476	9.26151	8.26081	7.42283	8.32949	9.05641	8.35749	7.69621	8.40995	7.17391	9.14626	7.99702	8.19504	8.03422	7.43733	8.48872	8.24967	8.92434	7.94202	7.93338	7.15728	8.05329	8.99478	9.02568	8.24474	7.97438	7.95684	8.18352	9.44458	9.02175	8.60654	9.68086	9.77362	10.384	9.64092
TMUB2	6.33507	6.8432	6.21252	6.81995	6.22353	6.55374	6.4001	7.31855	6.63407	6.78862	6.66075	7.10188	6.37683	8.06272	7.04595	7.51971	7.11232	6.40761	6.95765	6.85177	7.50767	6.2781	6.41395	6.13947	7.08096	6.84391	7.16789	7.27246	6.81983	7.02552	6.29121	6.36385	6.47669	6.12922	6.45332	7.09738	6.92675	6.62537	7.00997	6.54384	6.69655	6.7145	6.58027	7.97566	6.97302	6.70817	7.82711	7.24551	6.93589
CERK	9.01129	8.56857	7.84971	10.1152	9.1252	7.75371	8.04883	8.30118	7.49342	9.61073	9.46225	9.00569	9.17381	9.7424	9.02305	10.1463	9.10231	8.81324	8.67729	9.10034	8.28803	9.08919	8.78441	8.33883	8.10991	8.93375	9.50341	8.42396	9.63578	8.9135	8.31092	8.00742	9.59675	8.44854	9.31556	9.31456	8.15962	8.72995	9.27804	8.05004	8.34418	8.03466	9.10381	9.59198	8.99471	10.0239	8.99794	8.82547	9.86358
RBM26	7.74691	8.37767	7.08295	8.79089	8.30153	8.02345	8.16381	8.23679	7.64797	8.61086	8.54349	8.09554	9.04402	8.62016	7.78151	8.9128	7.25231	7.22328	8.61618	8.45027	7.02656	7.65412	7.66072	8.63245	6.96826	7.80914	8.63401	8.59533	8.68925	7.57736	7.68708	9.57314	7.6557	6.70837	8.00873	6.29237	8.46572	7.32911	7.15455	8.49567	7.2956	6.97799	9.79662	8.36891	9.66216	9.60204	9.80795	8.89489	8.11643
STEAP3	8.337	8.40137	9.01488	7.70658	8.20346	7.90888	8.04963	7.83277	7.63697	7.427	7.35941	8.6087	8.80002	7.70641	7.85987	7.7038	7.86458	8.33711	8.05046	8.23724	8.4408	7.79873	7.90695	7.61559	7.8028	8.06324	7.79168	8.5241	9.08424	7.43837	7.85949	7.94647	7.90654	8.79818	8.19748	8.50995	8.29783	8.02712	7.93721	8.87723	8.50392	8.13813	8.37863	8.26516	9.19394	7.58809	6.89627	8.5634	8.39076
RNF216	7.13676	7.04594	7.47623	7.06364	7.00616	6.93593	6.85804	7.27836	7.03507	6.89641	7.08731	7.75654	7.0427	6.95849	7.38162	6.94641	6.98538	7.30457	7.12605	7.36384	7.0735	6.80381	7.22483	7.38557	7.28076	7.07041	7.22197	7.29562	6.97248	6.68089	6.59518	7.05317	7.37021	7.34815	6.81132	7.23291	6.76293	7.12097	7.03802	7.6803	6.97468	6.82459	7.54326	7.95399	7.44042	7.30075	8.20243	7.97247	7.79062
SDCCAG3	8.64557	8.84278	8.42894	8.28283	8.62331	8.48974	8.55389	8.43944	8.4955	9.36025	8.89203	8.56928	9.1237	8.64765	8.39519	8.59279	8.44025	8.34843	8.39761	9.09608	8.36377	8.76027	8.09637	8.71938	8.55144	8.61377	8.81647	8.97478	8.77539	8.48871	9.03538	8.05138	8.32809	8.17299	8.72676	8.68109	8.92757	8.15756	8.3986	8.54964	8.1568	8.06597	8.09959	8.73837	8.74277	9.03979	8.62331	9.29951	8.95878
REV1	7.68194	8.46452	7.42028	8.88622	7.86237	8.26656	8.35206	8.25716	7.85983	8.571	8.59019	7.95872	8.38042	7.76226	7.67111	7.63787	7.67734	7.65167	8.5864	7.40891	7.55227	7.69958	7.75672	7.95777	7.69033	8.70954	8.08843	8.19973	8.95057	8.22994	7.95759	8.73232	8.04016	6.7555	7.64825	6.94054	8.02813	7.89378	7.42373	8.02788	7.20862	6.95635	8.7069	8.38381	9.21379	9.30398	8.47386	9.26355	8.87431
C19orf66	8.16601	7.99022	7.69249	8.3691	7.96848	7.99145	8.16295	7.99192	8.70688	7.69535	8.009	7.75324	7.89136	8.11947	8.23248	7.49837	8.15793	7.8885	7.87486	8.55634	8.39899	7.92995	7.97313	8.1712	8.56494	7.79603	8.1292	8.11947	8.21704	8.57531	8.4709	8.39392	7.83747	8.13716	8.7994	8.14497	9.11167	8.41704	8.19024	8.39636	7.81185	8.3289	7.89092	8.59972	7.8195	7.78054	7.26544	7.54253	7.70399
VIPAS39	7.5563	8.05137	7.39292	7.36653	8.78215	8.24282	7.54298	8.81412	7.30994	7.81736	7.92711	7.51354	7.5051	7.85032	7.30473	7.80833	7.87203	7.91542	7.91986	8.14422	6.85701	7.84991	7.70504	8.40377	7.91656	7.33191	8.32884	7.32371	7.40227	7.37973	8.11115	7.8158	7.93717	7.4813	7.77684	7.01842	7.60647	7.97355	7.47266	7.91179	7.97415	7.39987	8.50018	8.28319	8.80118	8.64497	9.08702	8.9122	8.10825
FBXO3	7.51638	7.76686	7.29762	8.92644	6.32779	7.58337	7.25806	6.67209	7.04023	8.45788	7.45595	6.61625	7.49639	7.85603	7.57751	7.81134	6.4961	6.045	8.72529	6.40214	7.46405	6.62971	5.74911	6.89647	6.0083	7.7651	6.98287	7.63025	7.57291	7.22883	7.47389	6.26445	7.53901	6.61375	6.63966	6.42113	7.38547	7.34028	7.25105	5.95773	6.96526	6.69486	8.85555	7.63874	8.25205	8.91428	8.47917	8.64459	9.37385
AACS	9.13786	8.6798	7.97988	8.14592	7.81408	8.20339	7.9448	8.01252	8.52929	8.14999	7.92611	8.09956	8.22539	7.5154	7.80052	8.53358	7.9531	8.15912	8.84935	8.4949	8.07989	7.41997	8.25271	7.32484	7.65143	8.65026	8.10143	7.42266	8.40323	7.08047	8.04708	7.50256	8.75859	7.75996	8.1994	6.95685	8.05028	7.90749	7.35299	8.10611	6.89411	7.63296	9.63025	8.88429	9.68476	8.91231	8.85984	10.0406	10.0703
DNAJC15	6.62672	6.03728	6.3572	7.27476	9.28644	8.39673	10.0692	5.26672	10.6855	6.45271	7.67171	8.92163	6.84376	9.25025	11.3594	4.94021	8.29201	8.03347	9.17669	9.33383	6.57402	8.92347	8.41074	5.14952	9.14644	7.84338	7.44113	6.68469	9.09242	8.21077	7.16865	7.84776	8.12808	8.99088	8.62789	6.49115	8.73279	6.51425	8.26533	6.29723	6.69014	7.20954	6.97131	8.0156	7.59957	9.47726	7.14655	9.5625	6.95503
SIL1	7.33072	6.60142	6.7163	8.64123	6.87849	7.32409	7.94923	7.30437	6.94613	6.73065	6.68923	7.23018	7.37885	6.9927	8.25436	6.33618	7.36407	6.80603	7.43921	7.38582	8.3191	7.35871	6.18267	7.52756	7.26728	7.2026	6.56968	7.59532	7.68191	7.61666	7.02465	8.59274	7.43645	7.15587	6.72546	6.65673	6.88957	7.41298	7.12299	6.50812	6.66793	6.88676	8.18475	8.97637	8.88289	8.65691	7.59331	7.65284	8.07692
LZTFL1	8.31356	7.34235	6.38519	9.05167	7.40643	8.05905	8.04963	6.87191	5.97297	8.81536	9.48787	8.3584	10.1258	8.28221	7.74387	9.0854	7.42142	7.70685	7.53279	7.07632	7.14539	7.11256	7.70959	8.74768	7.20547	8.4518	8.85614	8.15967	8.21921	7.41201	6.23012	8.03479	7.96632	6.25375	8.10028	6.93904	7.94481	7.20255	8.29477	6.87286	7.5821	6.65	9.46163	8.67636	9.81411	9.40544	9.23254	8.31356	10.0857
MCCC1	8.0416	9.45837	7.96453	9.51003	8.09669	9.0439	9.04922	8.99045	9.03421	9.87444	8.88239	7.53761	8.58366	8.57099	7.64677	10.0248	8.33935	7.62068	8.58804	8.48906	8.48026	7.86431	7.53232	8.21873	8.2089	8.88795	8.58475	10.0781	9.32017	8.32924	8.65271	8.25648	9.17494	8.58187	8.05929	6.4416	8.53646	8.34861	7.62598	8.03213	7.58456	7.85685	8.98548	8.63872	10.3958	8.51383	9.92649	10.1598	10.2483
RPAP1	7.77783	7.84139	7.5208	7.82623	7.90379	7.87451	7.52118	8.08236	7.85819	7.46126	7.79208	7.85759	7.78083	7.60467	7.63078	7.71014	7.83658	7.82009	7.97095	7.24611	8.16744	7.74837	7.60994	7.7565	7.69282	7.55267	8.11619	7.88423	7.1118	7.93082	8.31762	7.74501	7.7871	7.47413	8.13014	7.87669	7.5459	7.32343	8.31911	7.45593	8.0236	7.25003	8.28566	7.93519	7.36321	8.22415	7.42387	8.09252	7.58134
TTC4	7.85974	7.68331	7.47578	7.97636	7.36349	8.27561	7.69903	8.02947	7.66485	8.18214	8.21867	7.5607	7.75362	8.55967	7.6205	8.30885	7.86435	7.18843	8.74504	7.79047	7.23039	7.19627	7.58604	7.43139	7.92939	7.55489	8.35402	8.18263	8.18374	7.39268	7.65775	8.01643	7.74323	7.59504	7.8796	6.57121	7.52997	7.65845	8.21909	7.16177	6.9215	7.25982	8.89173	7.96559	8.65292	8.39726	7.33645	8.516	8.55429
ALG12	6.02659	5.86709	5.76488	6.18068	5.69228	5.31547	5.49593	5.8447	5.42349	5.53598	5.58584	5.70729	5.69251	5.66726	5.39392	5.26634	5.60817	5.61968	5.54224	5.61176	5.95707	5.6426	5.62608	5.73989	5.62471	5.90828	5.76021	5.54921	5.7711	5.85	5.61623	6.00526	5.94402	6.25122	5.89958	5.70794	5.6096	5.64611	5.8904	5.84342	5.92894	6.02709	6.23545	6.39485	6.37764	6.26074	5.90304	5.80968	6.00642
H2AFY2	8.96257	8.70622	8.75937	8.18756	8.24667	8.94878	8.7808	8.97611	8.52009	9.54893	9.23373	8.68686	8.70782	9.42783	8.88499	10.2798	9.38416	8.89833	9.72271	8.78062	9.00544	9.01698	9.12672	9.07144	8.59753	8.69845	9.92085	9.13721	8.59012	8.19034	8.99841	8.22652	8.80284	8.9324	8.57059	8.20499	8.58437	8.40121	9.09515	8.56368	9.11729	9.019	9.92017	10.1268	8.99339	9.46109	12.1424	8.48303	10.0908
TVP23B	9.18116	9.20205	8.06681	8.9688	9.74265	8.90065	8.79987	8.77417	8.97278	8.68379	9.69808	9.68413	9.75083	9.77212	9.28482	9.82673	8.5798	8.52648	10.0281	7.97244	8.23924	8.1996	8.67833	8.85586	8.6577	9.09216	8.97113	9.56643	9.57415	8.86734	8.52483	9.49396	9.94765	8.06762	8.63287	7.89562	8.65396	8.54409	8.73216	9.25369	8.04478	8.12922	9.51901	9.73335	10.4418	10.0594	10.2003	9.88336	9.70708
CMC2	8.42591	8.27506	8.10115	8.28395	10.2904	8.83923	7.93203	8.87576	8.50831	8.64525	8.01408	8.78297	7.36971	8.79266	7.95703	8.50588	8.42416	8.53179	8.9734	8.19134	8.02384	8.81035	7.69496	7.79953	8.62935	8.65294	8.66908	8.61706	8.56276	8.66738	8.03574	8.96477	8.41455	7.34524	8.07822	8.45431	8.34559	8.41085	8.21661	7.26578	8.64063	7.99473	8.63739	9.53118	9.18505	8.99158	9.25773	9.52335	10.5078
UFSP2	7.57968	6.79093	8.06321	7.07532	6.91928	7.96732	7.41601	7.81628	6.54164	7.75913	7.54833	7.12582	7.76303	7.90629	7.6386	7.64692	7.96962	6.01423	7.79128	7.05678	7.35937	6.9252	6.05038	6.87216	6.8767	6.75272	7.52011	7.62682	7.53046	7.64355	6.73737	7.51982	7.46757	7.03029	6.50912	5.92864	6.81447	7.23548	6.16284	6.43176	6.38478	6.43013	7.91826	8.38339	8.98039	9.52187	8.57906	8.18244	8.24696
HEBP1	9.87436	9.31665	9.384	9.82127	7.06534	8.72922	9.1834	8.42091	8.44125	8.94647	8.79806	8.60684	9.31629	8.83404	9.39992	9.53243	8.77223	9.65697	9.22563	8.23177	8.92139	9.01626	8.46672	8.62477	8.44051	9.55473	9.30222	10.0609	9.13886	9.21915	7.7926	8.67788	8.35965	9.36514	8.58791	8.27329	8.21042	8.40542	8.61675	7.14596	7.66187	7.77063	11.0438	10.0079	10.5508	10.7774	11.23	10.1846	10.7732
CDCP1	8.52907	8.89048	7.09952	7.36409	7.73788	8.10992	8.92964	6.672	6.3986	8.2423	6.89126	8.25855	8.70719	7.96786	7.97272	7.60979	7.91843	8.08924	6.38477	8.0675	8.12205	7.50082	8.34275	5.61494	8.86306	8.19055	6.74133	8.10339	8.27618	8.5815	7.47218	8.82128	6.99994	7.15284	6.5103	7.53225	7.41808	7.86076	7.29648	7.56053	6.61704	6.69572	8.21239	8.8824	9.48335	10.0806	7.75973	8.36813	8.91434
SMARCAL1	7.32898	7.15323	7.03356	7.65796	6.77712	7.40692	7.25704	7.02936	7.14166	6.64133	6.82611	7.25327	7.26333	7.29569	6.81593	7.16431	6.79799	6.78361	6.97623	7.00487	6.86859	6.517	6.58165	6.71372	6.84185	6.97856	6.54694	7.1002	7.2992	7.68045	6.25662	7.85719	6.92992	6.54549	6.87172	6.19362	6.50415	6.80391	7.26864	6.78801	6.7632	6.57023	7.34878	7.99289	7.92198	7.59384	7.83972	7.56232	8.13497
PLBD1	7.20486	8.41577	9.16694	8.18421	7.09356	7.80907	7.77269	6.24663	7.17111	8.50243	7.90809	8.86867	6.47721	9.50037	9.61863	8.24485	7.01028	7.03153	9.65522	9.85941	7.428	8.33635	7.79559	6.72099	9.1291	8.30799	7.86689	9.9095	7.17367	9.68229	6.85976	7.09459	9.25725	7.08598	8.46889	7.32062	6.69822	8.08233	10.0231	7.30469	6.78457	7.46737	7.10465	11.8277	10.5376	7.10723	10.3246	8.24449	7.3706
NFS1	7.79954	8.07792	7.41767	8.76621	7.50162	8.12778	8.15658	8.51935	8.26965	9.0607	8.92263	8.51923	7.81093	8.28945	8.09349	8.73444	7.95641	7.3657	8.70979	8.09945	8.00205	7.55189	8.19024	7.87653	8.20213	8.28061	9.20279	9.31196	8.56025	7.99222	8.08711	8.21808	8.26398	7.27659	7.76022	6.53771	8.24465	7.78694	7.50687	7.00243	7.20129	7.91869	9.05814	9.40453	9.63302	8.43908	8.51935	9.94395	8.54581
CAPRIN2	6.64725	7.71418	6.73923	7.19371	7.02686	6.82712	7.59032	6.86316	7.20973	7.83757	7.86135	7.17372	6.99189	7.04581	7.13454	7.98075	6.79654	8.22157	7.39954	7.09172	7.00023	6.80846	6.74	8.20848	7.44672	7.16954	7.47503	7.67189	7.49261	7.43377	7.05742	6.99391	7.06927	6.67304	7.77613	6.51416	7.12568	7.78674	7.88552	7.22116	7.12005	7.14404	7.51963	8.01213	7.77059	7.82553	8.64914	7.64887	7.85392
TOR3A	7.60411	8.18508	7.67877	7.79173	7.62072	8.32016	7.28428	7.05803	7.56097	6.97897	7.37048	7.37815	7.35608	6.20885	6.45134	7.55859	7.07199	6.63646	7.51218	7.41682	7.07318	7.38482	6.97239	7.02322	7.24568	8.02135	8.08022	7.34298	7.43225	7.09441	7.05251	8.09491	7.24219	6.86867	7.07221	6.95803	7.4792	7.52251	7.19141	7.08539	6.96027	6.54898	7.35245	8.34652	9.15796	7.76661	7.5658	8.60924	9.4897
DNAAF5	9.51531	8.57761	8.81124	9.75909	7.65009	8.71483	7.88772	8.26389	8.06636	8.63978	8.8485	9.52841	9.62422	8.70352	8.65799	8.48342	7.92564	8.72981	8.70451	9.13043	7.85703	8.09279	8.52878	8.47802	8.2952	8.44143	9.19814	9.25829	7.9318	8.20651	8.17148	9.496	8.8141	8.85483	8.81389	7.84194	9.22302	7.73544	8.43966	8.98545	8.25354	8.18139	9.88383	9.57052	10.4713	9.30155	10.7266	10.1387	10.4383
GPN3	8.85065	8.48215	8.68062	8.26398	8.84983	8.9024	8.38448	8.98288	8.06525	9.29601	8.55796	8.09648	8.56517	9.0775	8.48771	9.48718	8.63013	8.27973	9.4527	7.77843	8.10474	7.87303	8.43195	7.8316	7.94368	8.92935	9.91546	8.80329	7.50402	8.23532	8.18264	7.91614	8.76461	7.64296	8.57459	7.61774	7.8179	8.15141	8.93778	7.73442	7.71223	7.83985	9.70868	8.83511	10.1173	8.82676	9.91689	10.7901	10.1346
RPF1	8.64788	8.43072	7.62962	9.01794	8.64711	9.01716	8.20028	8.58291	8.33349	9.79745	8.1813	7.88906	8.05537	10.4174	8.72131	9.74735	8.69908	7.49175	9.8443	8.47286	7.80423	8.02796	7.88594	7.89151	8.41542	8.50685	9.58131	9.22564	8.67517	8.26057	8.37842	8.29497	8.90621	7.76994	8.36792	7.29165	8.28506	7.863	8.24867	7.41458	6.86755	8.08847	9.88838	8.88774	10.4678	9.37966	9.78278	9.71682	10.1734
MUS81	7.61693	7.68707	7.385	7.9439	7.51025	6.74986	7.8166	7.93659	7.65363	8.23723	7.56295	7.32013	7.25688	7.63508	7.66496	7.43612	7.38112	7.36223	7.31862	7.69234	7.21016	7.51146	7.3654	7.33158	7.51025	7.64825	7.70151	7.93787	8.19771	7.8683	7.48023	7.7051	7.47648	6.8261	7.1245	7.25645	7.83195	7.5488	7.8739	7.48134	6.81331	7.14699	8.70367	7.89149	8.5858	8.67609	8.53859	7.75904	9.25678
FAM222B	8.56127	8.66374	8.99379	8.7818	8.5938	8.4039	8.6777	8.38811	9.03565	8.33262	8.70177	8.94929	8.6668	9.149	8.6671	9.02192	8.90142	8.86301	8.67573	8.78022	8.65799	9.04898	9.07944	8.8715	9.24795	9.20257	9.07238	9.11832	8.41656	8.74299	8.01348	9.09814	9.54755	8.92062	8.43739	8.85977	8.80272	8.60861	8.69196	9.29008	8.95711	9.14057	8.40016	9.61531	8.98497	8.41195	9.4435	9.47206	8.83651
TBC1D17	6.48651	6.37774	6.4134	6.41832	6.12527	6.01352	6.32347	5.44741	5.94272	5.87909	6.09996	6.17542	6.77274	6.35562	5.83307	6.44811	6.28701	6.31655	6.76796	6.51636	6.64281	5.82465	6.33542	5.98392	6.35763	6.66353	5.86577	6.2081	6.1703	6.0556	5.95888	5.80378	6.18227	6.46023	6.2019	5.9467	5.75356	6.16734	6.42575	7.01767	5.86415	5.94389	7.25191	6.35449	6.87403	7.56587	7.63081	7.00034	7.05427
PSMG2	10.2892	10.0718	8.88599	10.6001	9.53969	9.32394	10.2554	9.99727	9.70951	11.0415	9.70653	10.0786	9.57686	10.8396	9.34956	10.3653	8.92812	9.42683	9.98867	9.74165	9.3319	9.81171	9.23522	9.67344	10.5368	9.24433	11.0783	10.1622	10.6874	10.3955	9.42639	11.0321	9.35126	8.99214	9.68327	8.49754	9.81713	9.28301	9.62778	9.44102	9.09867	9.36381	10.6418	11.0727	11.2098	11.5089	11.0188	11.4522	11.214
GREM1	3.39403	3.3412	3.64515	3.50838	3.48827	6.92856	7.80733	3.34272	3.16374	3.80292	3.33469	3.08731	3.18403	5.96009	7.32458	3.35548	6.92116	6.52788	3.26137	3.59557	3.29565	3.86135	4.03575	3.38294	4.3283	4.2214	4.13252	3.34728	3.40042	3.3199	3.42065	3.20574	3.2749	3.89924	4.77201	4.86584	5.0229	5.86935	3.34859	3.84894	6.62317	4.55879	5.47397	5.32748	3.13344	6.78351	3.46699	6.52946	3.33906
YARS2	7.73356	8.36903	7.10108	8.53266	7.56803	8.21086	7.33909	8.39907	7.69508	8.1027	8.16269	7.48303	7.64498	8.22541	7.25899	8.47611	7.92628	8.05638	9.11763	6.85889	7.02493	7.46071	7.48153	7.78958	7.92847	8.05569	8.28385	8.64563	8.01496	7.67046	7.32437	7.70804	7.59177	7.53747	7.91972	7.43408	6.84566	7.53644	7.69653	6.93627	7.63046	7.23163	8.26327	8.75619	8.8308	7.92847	9.23748	8.20948	9.16168
BBS1	8.01469	7.3802	7.02519	8.1816	6.25886	7.30388	7.47038	7.46972	7.45135	7.95328	7.55208	7.13465	7.52792	7.44944	7.77447	7.61083	7.06818	6.61781	7.74151	7.85122	7.73379	7.05665	7.52449	7.59287	7.1093	7.51376	7.83709	7.68118	7.39822	7.3249	7.31558	7.77201	7.79226	7.59218	7.82804	7.00098	7.65977	7.25244	8.31515	7.56526	7.31466	7.4932	8.39318	7.64747	8.71705	8.10969	8.30594	7.88433	8.67787
PELO	6.78719	5.80168	7.2067	7.26549	7.45032	7.09729	7.4065	7.07303	6.1843	7.18523	6.51355	6.34969	6.90593	7.03336	7.44979	6.62304	7.3423	5.90046	6.68841	6.56181	6.00214	6.48412	6.28901	6.66653	7.27356	6.53632	6.19528	7.4801	6.53303	6.20653	7.13977	6.61295	6.82246	6.8306	6.00045	6.06996	7.04598	6.78598	5.74102	4.7173	5.98257	5.09158	8.9681	6.80396	8.36488	9.08271	6.76638	7.41391	9.01985
COLGALT1	6.987	7.66333	7.83289	8.22711	7.97312	7.73145	7.81361	8.25259	8.2806	7.71059	7.92738	8.11712	7.34389	8.19693	7.80873	7.49664	7.62094	7.44536	7.9464	8.72909	7.39389	8.10513	7.68776	7.05039	8.1436	7.9698	7.30441	8.20856	8.13151	7.9294	7.92659	7.51405	7.61361	7.64417	7.95367	7.21272	7.95445	7.90642	7.89286	7.59258	7.12563	7.64564	8.17486	8.5574	8.8181	8.70487	8.58512	8.56685	8.68752
KCTD5	8.87976	8.22598	7.76753	8.15672	8.54951	7.63539	7.68659	8.15543	8.167	8.50742	7.75474	8.23519	7.57774	8.40887	8.03229	8.03952	7.74525	7.92047	8.32735	7.49234	7.47723	7.87341	8.24611	7.74513	7.39146	8.49267	8.08189	7.95578	8.2271	7.86561	7.41986	6.96564	7.73423	7.27313	7.37962	7.05527	7.59345	7.69113	7.46001	7.28043	7.26196	7.28638	9.7551	8.24866	8.63481	8.11896	8.95247	9.18973	8.31667
TRMT2A	6.65425	6.59961	6.51616	6.39933	6.53565	7.02245	6.60792	6.39825	6.45731	6.83487	6.27304	6.66067	6.80672	7.18533	6.73958	6.79841	6.59803	6.4026	6.36117	6.62286	6.40298	6.47936	6.6081	6.78898	7.00144	6.69854	6.73187	7.16236	7.04999	7.07576	6.87741	6.52481	7.04472	6.94563	6.67534	6.45234	6.80544	6.46474	6.87208	6.69453	5.8533	6.32555	7.44042	6.85131	7.54272	7.04702	7.04906	7.1749	7.54908
POMT1	6.70939	6.47515	6.72867	7.13896	6.64212	6.33424	6.91992	6.96018	6.43664	7.28626	7.31916	6.30692	6.63043	6.78269	6.31399	6.80782	6.40633	6.38232	6.66562	7.38628	6.9363	6.96522	6.38243	6.37011	6.4017	6.44214	6.7131	6.96557	7.02899	6.8158	6.59428	6.96557	6.70151	7.25414	6.64412	6.50003	7.47401	6.98258	6.21374	6.75183	6.40685	7.1305	6.98737	7.58483	7.13075	7.14034	6.98938	6.92596	7.68891
TMEM14A	9.81918	10.6467	10.3157	10.9485	11.1814	10.1065	9.98801	10.7981	10.2072	12.0325	10.3449	10.242	9.56515	10.4409	10.7335	11.4666	10.3814	9.6392	10.9675	9.94755	9.28681	9.59717	9.66339	8.71912	10.1882	10.6362	10.9985	11.4488	9.90953	8.26372	9.18315	10.6498	10.68	9.89611	10.124	8.42008	10.2861	9.80466	9.62589	8.96482	9.43864	8.954	11.4127	11.1865	10.9579	11.3094	11.8879	11.8021	11.9091
ZCCHC8	10.0325	9.00226	8.66702	8.71237	9.04612	9.36183	9.90172	9.2027	9.57455	11.2098	8.99306	9.53418	9.50689	9.71106	9.44792	10.4466	9.05613	8.91383	10.1611	9.37447	9.0077	8.64047	8.97664	9.07177	9.31508	9.80224	9.9605	9.75702	9.58705	9.28316	9.86432	9.57945	9.37082	8.42691	9.21243	8.56501	9.05198	9.06077	9.25327	9.30465	9.01886	9.06188	10.0344	10.1547	10.6135	9.67734	10.2441	11.0073	10.3499
AGBL5	7.91243	8.02601	7.73336	7.71055	7.43342	7.33837	7.18673	8.35598	7.47614	8.27731	8.12637	7.98572	8.10342	7.50478	7.15357	9.00249	8.27765	6.72782	7.70309	7.80397	6.44097	6.9264	6.8883	8.04716	7.54069	8.06789	8.86655	8.42028	7.82549	6.85412	6.94616	7.59198	7.9752	7.56525	6.53556	6.83766	7.55486	6.7386	7.4034	6.38566	7.0241	8.10355	8.58983	9.25587	9.11514	8.74653	9.0299	8.93816	8.03968
EXOSC5	7.49288	7.83435	7.72445	9.04783	7.59873	7.83898	7.69999	7.77491	8.38298	8.76406	7.55232	8.38925	7.74688	7.50254	7.45519	8.77101	7.95556	6.91477	7.43211	8.01477	7.8302	7.87264	7.2572	8.0417	8.04758	6.65188	7.93141	8.52735	8.22071	7.90007	7.51414	7.16198	8.48714	7.8159	7.22639	7.26201	7.09621	7.72167	7.38679	7.81177	6.77868	6.81912	9.29946	8.83376	9.58209	8.13248	8.46298	8.31155	9.53345
ENY2	10.4863	10.8782	9.47055	10.0502	9.75573	10.8292	10.8746	10.7461	9.9408	11.0044	9.46507	9.74756	9.37411	11.0554	10.5195	10.6548	10.7714	9.71636	10.6876	10.1357	9.98278	9.54257	9.32599	10.4401	10.6633	11.2356	10.4061	11.2634	11.31	10.9146	10.0013	11.359	9.41417	8.877	8.92892	10.0353	10.6462	10.2675	9.13468	9.38419	9.70273	9.65796	10.417	10.7683	11.4851	11.5871	11.9132	11.4074	12.2239
IFT46	6.80802	6.2849	7.80673	8.34106	7.02252	7.18921	6.74254	7.28001	7.11414	7.17888	7.2863	7.20425	7.32123	7.22258	7.10511	6.9976	6.9243	6.84269	7.35896	7.26231	7.13682	6.92607	7.11437	7.73449	6.73449	6.80518	7.47401	7.20918	6.98434	6.73458	7.0435	6.1716	7.29586	7.28459	7.17522	6.86575	6.82172	6.95509	7.1924	7.09956	6.45978	6.83612	8.01097	7.85371	7.92053	6.73148	7.83556	7.50106	8.34573
NDUFA4L2	5.67415	5.58183	5.70274	5.52451	6.22672	5.75129	5.67174	7.04404	5.67682	5.62606	6.93154	5.65538	5.60345	5.80522	5.82344	5.91321	6.46794	5.87075	5.27961	7.11003	5.57638	5.84256	7.57747	7.26769	5.61234	5.78833	5.67324	6.02119	5.55176	5.6418	6.14442	5.80231	5.9352	6.15766	5.63072	5.52513	5.55204	5.47256	6.00627	5.60952	5.45475	6.35779	7.77342	6.29209	6.12183	5.66602	6.37348	6.96917	6.32941
KLF11	7.3189	7.49474	7.44446	7.49918	7.34035	7.08648	8.1796	6.79172	6.26161	7.37235	7.59755	8.05545	8.31717	7.96045	7.31654	8.39801	7.15374	6.40729	8.06186	6.4929	6.74069	6.75346	6.59626	6.51104	6.42832	7.6742	8.18215	7.65017	7.34357	6.95531	6.71234	7.78794	6.9675	7.1589	6.67755	6.58993	6.77069	6.89194	7.03378	6.29458	6.90258	6.49115	8.68347	8.39384	7.54717	8.25107	6.72588	7.72538	7.84852
ALAD	6.99761	7.23533	5.93297	6.6481	7.62026	6.70652	7.47606	6.31983	5.74899	5.90662	6.81989	6.41282	6.91766	7.16605	7.40472	6.75201	6.41302	6.0317	6.38017	6.29108	7.07272	6.12133	6.00768	6.66124	6.42346	6.77478	5.34115	6.90119	7.18514	5.73866	6.03582	7.26014	6.22153	6.09068	5.97162	6.20701	6.86226	6.52021	6.29822	6.23311	6.16743	6.46653	7.38723	6.79588	7.0826	7.18638	6.20859	7.53977	7.57257
EIF2B3	7.598	7.74955	7.44729	8.07646	7.35804	8.03546	7.0985	7.68675	7.2528	7.56139	7.40045	7.37252	7.1446	7.7737	7.34318	7.6523	7.79692	7.14603	8.24569	7.60328	7.36011	7.17786	7.03456	7.22812	8.60508	7.5999	7.58633	8.03584	7.52598	7.39237	7.54631	7.15166	7.4541	7.03197	7.37881	7.2848	7.23856	7.29012	7.45725	7.174	6.75099	7.08645	7.71046	8.25918	8.10942	7.8454	7.06276	8.07459	8.05823
ZNF302	7.70356	9.13072	7.15805	8.96518	8.10407	8.38014	8.54609	7.55963	7.80028	9.76694	9.80062	8.4324	8.16512	8.05153	7.4628	8.29204	7.71218	7.20367	8.25427	8.03103	7.70792	7.91705	7.74057	8.31297	7.67369	7.31563	8.47686	8.30837	8.63765	8.24786	7.77651	9.08097	8.5081	8.21541	7.88812	7.03878	7.76508	7.79908	8.70889	7.61868	7.63453	8.16744	8.19074	9.46381	8.93028	9.81639	9.49112	8.20055	9.40367
THYN1	8.81508	7.77718	9.23023	9.22107	7.96739	8.26159	7.45427	8.40552	8.43928	8.1215	7.5625	8.42064	8.36879	6.89141	7.79203	8.35099	7.8394	7.36765	8.25321	8.80784	8.48118	8.07833	8.55612	8.56252	7.93992	8.43438	9.26993	8.74681	8.63316	8.32574	7.18352	8.42033	8.79	8.31741	8.48262	7.68627	7.79733	8.3297	6.94488	8.00878	7.47458	7.51961	9.81642	9.00167	9.70276	9.19179	9.3341	9.65277	11.6115
THAP7	6.03784	6.57767	6.62083	6.62157	6.62995	6.72966	5.83635	6.49198	6.22125	6.13575	6.23079	5.70381	6.12968	6.74059	6.38178	5.97602	6.08426	6.51671	5.90015	5.95063	6.12282	6.16151	5.84978	6.20979	6.51824	6.42519	5.89927	7.34081	6.44651	6.45239	5.61628	6.70046	6.36789	6.47296	5.97321	6.42248	6.63409	6.14481	6.58062	6.76993	5.87164	5.95108	6.29181	7.14253	7.00295	6.74537	7.01667	6.6086	7.09604
SNRNP25	8.04841	8.89801	7.99555	8.39698	8.09642	7.85525	6.7358	8.72128	7.70528	8.63645	7.845	7.21298	7.12224	8.09538	7.88871	7.36644	8.44262	7.82946	7.99857	7.81684	7.92783	7.70532	7.42113	7.10807	8.15315	9.05852	7.96677	7.84713	8.50742	8.2221	7.35995	7.30866	8.05825	6.85552	7.26611	7.44606	7.46	7.77467	7.58638	7.46745	7.6356	7.5871	8.71168	8.934	8.74467	8.4139	10.6509	9.04619	8.90491
SLC2A4RG	7.29149	7.03265	7.22727	6.74488	7.06483	6.94078	7.00238	7.12964	8.06743	6.819	7.72149	7.50997	7.00131	7.16178	7.48863	6.72655	7.68783	7.54637	7.24651	7.54455	7.26276	7.48646	7.81303	7.58685	7.45026	7.54906	7.15769	7.03232	7.17428	7.43703	6.79934	7.5203	6.88231	6.95247	7.29149	7.13332	7.67911	7.43021	7.2685	7.43914	7.16076	7.18282	7.81258	7.43397	6.94267	7.32563	8.04332	7.97015	8.1018
UXT	9.53954	8.87524	9.11942	10.7437	10.2965	9.04228	9.17578	9.60959	9.37451	8.53668	9.17981	8.33853	9.24491	8.99038	8.38294	8.86889	9.13978	8.68272	8.36754	9.5331	8.9026	9.08685	9.38262	9.11949	8.61245	9.53954	9.27471	10.1356	9.85775	8.64309	9.10746	9.46202	8.57494	8.21238	8.29733	9.22849	9.36172	9.01438	9.25358	8.15019	8.48096	8.4286	12.0131	10.3726	10.8904	11.0924	11.1045	10.9197	11.6027
RNASEH1	9.03111	8.30023	6.5247	9.02002	7.54257	7.88771	8.44027	7.33628	7.87658	7.957	8.00664	8.40914	8.35658	7.92955	7.71965	9.08433	8.22021	7.45711	7.8425	7.3647	7.43596	7.73623	7.30919	7.86176	7.51387	8.13338	8.42629	8.4073	8.6487	7.4247	7.69783	8.49	7.39114	7.29937	7.10218	7.45345	7.82913	6.89172	7.60407	7.97038	7.34728	7.93758	8.93224	8.40526	8.78999	9.68384	8.08166	9.72657	9.23951
STK26	9.38199	8.25549	5.31618	8.60964	9.22663	7.92519	8.07698	8.29756	7.74736	9.13877	8.45951	6.00458	7.17605	7.9301	7.99003	9.5377	8.49838	8.52269	8.18422	9.74093	7.5924	8.10568	8.0872	7.22734	8.48257	11.159	9.06104	9.06873	9.12448	5.42756	8.42439	5.59234	8.02355	9.72399	7.93402	7.33976	8.2041	9.06647	9.5256	7.96342	8.24777	8.02765	9.98025	9.83854	8.95622	9.4394	9.77277	5.22494	10.4641
THEM6	7.21351	7.58481	7.65259	8.04684	7.15753	7.52356	8.43948	7.94602	7.16804	6.61411	7.31277	8.06747	8.02398	7.48819	7.25603	7.2966	8.00179	7.38353	7.40973	8.26337	8.18193	7.78441	8.07096	7.90513	6.99482	8.17486	6.97314	7.96351	9.0437	6.52754	7.02391	8.72423	7.48819	7.16684	6.60785	7.22957	7.729	6.96873	7.07258	6.88478	6.61839	6.6967	8.73867	8.25876	8.09424	9.18652	7.80992	8.67544	9.58786
ARHGEF3	8.54224	9.38003	7.80849	9.47231	9.87952	9.55536	8.48544	6.77067	7.44141	9.5553	8.55198	8.92838	8.17713	9.44764	8.321	9.58994	8.91298	8.87953	8.67974	7.96767	8.70579	8.14899	8.42095	6.61185	8.628	9.5674	9.63442	9.53958	8.9845	8.85693	7.79858	9.6346	9.7109	6.88473	8.19385	8.29137	9.88963	9.0388	8.35247	8.67219	8.51688	7.73193	7.68591	9.67225	8.95755	10.6715	10.0593	8.7136	11.0269
FOCAD	7.54385	7.4782	7.69278	8.32349	7.45695	7.1503	7.54385	7.43698	6.91859	8.40528	7.43477	5.91706	7.62034	7.64945	6.74302	6.36314	6.61377	6.51169	6.91516	6.4357	6.50564	6.9259	6.61086	6.5945	8.27876	7.33743	6.34956	7.92248	7.87344	7.77777	6.89754	6.66438	7.65567	6.74619	7.94151	6.44193	7.51611	7.10166	7.42573	8.01662	6.49247	7.03032	7.28528	7.48024	9.83977	7.28471	7.70302	8.44247	6.75782
WDR59	7.47509	8.10103	6.92455	7.51685	8.06198	6.63612	7.29349	7.61512	7.58141	8.56242	7.35036	8.50798	8.02477	8.32058	7.20351	8.90271	7.29177	7.59387	8.69355	8.14534	7.2855	7.67408	7.11614	8.19243	7.70544	7.38182	6.94935	7.96847	8.42565	7.67814	7.04284	8.16374	8.01964	7.35773	7.88249	6.65308	7.8241	7.56745	7.64468	8.8143	7.48075	7.65936	8.98702	8.38598	8.2078	7.88752	8.02969	8.58157	9.28339
GLYR1	8.99688	8.31861	7.6133	8.07531	7.89271	7.44425	7.80701	7.60418	8.07639	9.39335	7.41917	8.29897	8.1222	8.1133	8.38198	8.20938	8.0077	7.95475	9.47521	7.86845	7.51537	7.60744	7.25593	7.14324	7.90584	7.94309	7.88748	7.52106	8.94121	7.74002	7.25461	7.53347	8.18428	7.07781	7.73096	6.56037	7.44141	7.76743	7.56011	7.65767	7.61267	7.61579	9.09819	8.54343	8.7156	8.25225	9.47864	9.57173	8.36234
HILPDA	9.22964	10.6502	9.32302	9.11148	8.42281	8.6207	9.74853	9.67989	9.50779	10.1923	9.31628	9.28163	9.19007	9.49527	8.93905	9.82389	9.15628	8.81582	9.71009	9.40173	8.84637	9.37752	8.80515	9.39859	8.98499	9.06236	9.51179	8.99642	9.04577	8.38044	8.17358	9.0673	9.05184	8.96094	8.972	8.45526	9.17549	9.12769	9.01011	8.91791	8.50851	8.83172	10.1767	9.28399	9.99772	9.39361	8.55157	10.2408	9.66467
PLPPR2	5.69723	6.38098	5.69155	5.74973	6.3006	5.72557	5.8452	6.13932	5.95503	6.06391	6.02577	6.07954	5.77773	6.06391	6.24159	5.78942	6.11912	6.18552	5.74009	5.95863	5.92806	6.05542	6.1074	6.23366	6.19811	5.87829	6.05261	5.93817	5.60242	6.05906	5.96396	6.01848	6.6199	6.52429	5.91327	6.24236	6.09949	6.06391	6.13165	6.21122	6.34645	6.21296	6.20906	6.29289	5.58856	6.09199	6.56259	6.26439	6.46267
PNPO	9.63349	9.69169	7.9144	8.93222	9.25753	8.97381	8.31138	9.32042	7.94402	8.69926	7.77309	8.34508	8.8773	8.73013	8.51487	8.62656	8.79961	7.97327	8.62078	8.07471	8.65348	8.21698	8.82955	8.49826	8.74976	9.03183	8.35658	10.3094	9.01209	8.25957	8.85426	8.48616	8.67427	8.75493	8.16693	7.96935	8.16493	8.19125	8.84273	8.88795	7.64026	8.38269	9.15069	9.57236	10.3652	8.85869	8.31384	9.98525	8.76369
WDR12	9.63598	10.2599	9.4343	10.1477	9.53891	9.68827	9.27836	8.73666	9.23878	10.7668	9.29109	9.3769	9.61644	10.1075	9.46731	9.98985	8.94806	9.07265	10.0128	9.39677	8.96879	9.06987	8.9705	9.10078	8.9459	9.17578	9.94868	9.76085	9.87889	10.0386	8.21705	9.08827	9.9729	9.73006	10.2915	8.5718	8.30439	9.04041	9.50872	9.47481	8.92288	8.29789	10.5742	9.88204	11.1098	10.1192	10.2952	10.6844	10.5626
TMA16	8.27652	8.35295	6.84473	8.21569	6.23115	8.10997	7.64429	7.52945	7.55715	9.49891	7.1495	7.34318	8.26683	7.40967	7.35684	7.70411	8.74135	6.06658	7.81942	7.23597	6.32843	7.79318	6.54857	7.17566	7.192	7.33495	7.7342	7.45131	7.70901	6.5909	6.55668	7.86671	7.57419	5.57805	6.96115	6.42668	6.5557	7.45299	6.97946	7.06111	6.57413	6.19236	7.94451	7.52468	7.91071	8.63944	7.3044	8.01672	9.0694
SMG8	8.17153	7.65289	7.40812	9.23317	6.79347	8.08482	7.63673	8.32477	7.61797	8.44662	8.11205	7.64137	7.82511	8.98829	7.96655	8.76966	8.27907	6.75537	8.41513	7.25284	7.47703	7.66715	7.12121	7.25963	7.91593	8.43003	8.12352	8.51478	7.29793	7.38191	7.9827	7.44316	9.13997	7.34477	7.47485	7.17679	7.18911	7.60011	7.45033	6.54037	7.25148	7.55618	8.06045	8.80585	8.7861	9.22217	9.07704	8.29189	8.65937
PAXBP1	8.44235	8.82197	8.14666	8.22855	7.71994	8.47363	8.57564	8.18769	7.85592	8.80571	8.75256	8.21167	8.96926	8.77764	8.053	8.65468	8.4199	8.57825	8.98987	8.80156	8.47712	8.12877	7.78655	9.28993	8.29106	8.78613	8.42235	8.56764	8.61448	8.19811	8.00984	9.05731	7.89334	7.60814	8.59884	7.70686	8.88219	8.08432	8.08934	9.17569	7.61242	7.98959	9.87963	8.54695	9.36836	9.88364	10.0922	8.77492	9.47944
JADE1	8.57831	8.01513	7.87915	8.12389	6.95482	7.73506	8.10281	7.36952	7.87082	8.36382	7.93868	8.05413	9.03322	7.86734	7.66961	8.48098	7.64196	8.10237	7.36407	7.39874	7.69879	8.28963	7.33014	8.00199	7.59645	7.98122	7.67275	7.60951	7.72769	7.26389	7.84528	7.78487	8.13205	7.65945	7.50771	7.33685	7.98407	8.38275	7.82966	7.65935	7.71352	7.53751	8.51293	8.51813	8.28409	8.62027	7.84286	7.86009	8.10468
FAM13B	7.73157	8.01894	5.90666	8.53119	7.69484	7.3977	9.04421	7.92219	7.14435	8.98847	8.43828	8.36417	8.51087	7.70443	8.90056	9.01477	8.61785	7.14848	7.58642	6.94164	7.91368	7.61854	6.95671	8.48104	7.0778	4.17101	7.92334	8.18336	8.37686	7.16675	8.61836	9.55335	7.879	6.21895	7.25678	7.36454	7.88509	8.43549	7.75098	6.2596	8.29896	7.56712	9.40588	8.76263	9.13455	9.85399	8.76287	8.3122	8.08907
SLC35A5	6.24498	7.12163	5.85687	5.9271	7.91977	6.34241	7.1297	6.46826	5.93173	5.93371	7.34114	6.60015	7.16914	6.99354	6.47901	7.99273	6.7654	5.24987	7.17587	6.008	6.73593	5.8802	6.0623	6.96285	6.70118	7.12053	7.35206	6.8564	6.61089	6.51268	6.20751	6.86797	6.25653	5.58789	6.36579	5.91818	6.30213	6.0641	5.41078	5.68062	5.18862	4.7886	7.606	8.18743	8.35125	8.11354	8.34605	8.41305	8.07577
TBK1	9.15275	8.88611	8.15931	8.65973	9.32051	8.62962	9.17678	8.06302	8.35298	9.55276	9.21458	8.61317	8.72218	8.49065	9.22052	9.35976	8.45766	7.35273	9.13027	8.14717	8.87083	7.98722	8.16954	7.70528	8.8322	9.16267	8.56107	8.63443	8.35957	8.91201	8.43314	7.92672	8.72252	8.56607	8.00853	7.96344	8.43697	8.37378	8.60302	7.70728	8.87409	8.2697	9.83725	9.56901	9.37002	9.36356	9.81851	9.84236	9.33828
MAP1S	5.70495	5.22538	6.03482	6.39581	5.81665	5.64269	5.58412	6.06752	5.98912	5.05779	5.50309	6.18961	4.97721	5.41094	5.38964	5.59994	5.54979	5.70894	5.62057	6.68721	5.88536	5.25461	5.74218	5.0914	6.38919	5.33877	4.96782	5.72335	5.02677	6.02756	5.19484	6.12217	5.55953	4.9627	6.32438	4.57723	5.76737	5.74396	6.0875	6.30228	5.33444	5.31505	6.8851	8.07358	6.87651	6.66114	7.66597	7.36601	7.07839
LHPP	6.63252	7.55564	7.65381	6.74475	7.0747	6.88912	7.27156	6.75481	7.39148	6.47503	6.92921	7.52316	7.03739	7.13685	7.09853	6.91722	6.96686	7.44491	6.89755	7.25348	8.13914	7.76499	7.72624	7.1617	8.06373	6.82638	7.10456	7.11287	6.59187	8.02801	7.41583	7.42739	7.55145	7.6136	7.49735	7.4733	7.46626	7.27645	7.28312	7.58706	8.1908	7.33203	6.95997	7.18446	6.80437	6.65615	6.81334	7.15274	6.73886
E4F1	6.44934	6.59228	6.22815	6.87195	6.48604	6.46085	5.93581	6.56614	6.68533	6.51077	5.48821	6.3509	5.773	6.30725	5.97377	6.1406	6.13077	6.48141	6.43333	6.50757	6.08056	6.45784	6.26861	6.47734	6.50655	6.97679	6.64349	6.89321	6.98789	6.86939	6.17227	6.48108	6.52961	5.81922	6.08822	6.33557	6.13678	6.3205	6.05083	6.90235	5.57265	6.54431	7.25192	7.34838	7.65749	7.66318	7.80989	7.84952	7.63344
RANGRF	6.83864	7.12317	6.73523	7.36506	6.20957	6.91733	7.30592	7.29685	6.48508	7.15917	6.77491	6.50745	6.64398	7.0651	6.4875	7.32234	6.72561	5.92285	6.57961	6.73208	5.93223	6.69332	6.84177	6.92129	6.40204	7.27075	7.71943	7.37726	6.94342	6.43648	5.968	6.45944	6.62947	6.36353	6.61711	6.73724	7.07223	6.60401	6.88832	6.28535	5.94891	6.35476	7.03171	7.70011	7.59966	8.49474	8.25843	7.58811	7.94753
APTX	8.74608	8.46843	7.87344	8.81413	7.69045	8.6955	8.86926	7.75278	8.18142	9.34961	8.68383	8.10089	8.32039	8.59739	8.03125	8.34817	7.74559	7.3666	8.68588	7.77884	7.5938	7.75155	7.46351	7.23299	8.94474	8.44057	7.64405	8.1796	8.97039	8.21586	7.67852	8.83678	7.72097	7.63367	8.40257	6.94749	8.43579	7.93145	8.25417	9.03483	7.36759	8.16517	8.87733	8.61151	8.40843	7.53364	8.43153	8.64881	7.7358
RNF38	9.12783	9.05505	8.93233	9.63226	8.76639	8.87264	9.43816	8.65164	8.62574	10.3909	9.86044	8.71691	9.20498	10.0518	8.83202	9.66027	8.58914	7.99237	9.86567	7.39476	7.9413	8.13734	8.33237	9.1129	9.14111	9.04587	8.90113	9.14863	9.98438	9.22925	8.22106	9.66219	8.54179	8.48654	9.00651	8.61422	9.21037	8.78707	8.9585	8.60523	8.28467	8.80883	10.7705	9.59246	9.14901	9.4635	10.3589	9.62915	10.1328
CD320	6.92762	7.52483	7.91599	9.11267	7.96043	7.30702	7.15629	7.80021	6.90829	7.03288	7.77938	7.39383	7.64117	7.78919	6.86506	7.9243	7.2181	7.00721	7.31659	7.39837	7.29374	8.03217	8.04855	7.49976	7.43953	7.16199	8.16174	7.37128	7.68153	7.57276	7.3205	7.14369	7.65995	7.96106	6.89912	7.21382	7.27806	7.41044	7.06166	6.95815	6.88448	7.32253	8.67956	8.27664	7.65125	7.59851	8.70081	7.88531	9.35288
FHOD1	6.22443	6.57618	6.46814	6.52302	6.66092	6.22543	6.77925	6.15755	6.10823	6.44582	6.27015	6.54092	6.21769	6.1919	6.35895	6.29999	6.61891	6.59341	6.58357	6.42209	6.44959	6.66893	6.13852	6.21079	6.38142	6.54643	6.50503	6.54798	6.56776	6.659	6.17258	6.97091	6.99396	6.58357	6.71148	6.33587	6.58357	6.41442	6.42433	6.49566	6.33398	6.38394	6.65815	6.83633	6.66363	6.97978	6.81077	6.56685	7.52713
TMEM134	7.98716	8.62124	7.29614	7.97582	7.62416	7.18623	7.89458	7.26607	6.5128	7.97047	7.67408	7.20734	7.27179	7.82466	7.33952	7.22618	6.82477	8.43213	7.17648	7.03552	6.81139	6.55373	6.85884	7.02261	7.19783	8.82838	7.68162	8.01586	8.39755	7.80065	7.06628	8.66368	7.38641	5.93084	6.38179	7.75858	8.31066	7.21384	8.31564	7.53042	6.19909	6.65106	8.84291	8.80049	8.51565	8.72809	8.49369	7.98547	9.13448
RETREG1	5.96486	6.57595	5.89935	6.43052	6.08009	6.45009	6.23655	5.7944	5.72341	6.34319	6.97875	6.98029	7.08989	5.94151	6.25976	6.25061	6.41726	5.81039	7.35985	5.89087	7.23752	6.60009	6.20453	6.48936	5.84563	6.35542	5.8023	6.79359	6.64899	5.78252	6.32031	6.72148	6.21251	6.90277	5.94597	5.97337	6.65922	6.45009	6.69894	5.90746	6.34339	6.04236	8.75452	8.27567	6.61844	8.16133	6.89932	7.53277	8.08296
UCKL1	7.14801	6.89361	7.22684	9.037	6.48574	7.30162	7.08064	7.35894	8.13213	6.97268	8.50879	7.48318	7.30166	7.86202	6.57536	8.09162	7.52257	7.12447	7.41012	7.42384	7.38507	7.75743	7.00891	7.18906	7.14062	7.2273	7.74279	7.74372	8.28582	8.02094	6.5609	8.25697	7.51619	6.4622	7.54634	6.70877	7.4637	7.64524	7.96787	7.48262	6.75065	6.84029	8.99703	8.823	9.55165	9.52015	9.30384	8.64957	9.31903
RIOK2	8.02284	7.91985	7.26661	7.46817	7.03222	7.84043	8.31205	8.21213	7.65462	8.25873	7.23152	7.6366	7.61386	7.90938	7.50546	7.9451	7.48555	7.46201	8.15709	7.93639	7.12305	6.98889	6.91793	8.21723	7.9481	7.74354	7.70819	8.00067	7.68176	7.59718	7.32475	8.10341	7.62248	7.09326	7.42681	6.9526	7.28174	7.83681	7.22435	6.69539	7.25875	6.36208	9.07201	7.20519	8.69775	8.47814	7.6615	8.51335	8.28518
MRS2	8.33014	7.72909	6.99732	8.13497	7.77384	7.3831	8.00266	7.26809	8.68071	8.56144	8.27162	7.45029	7.50238	8.82294	7.69874	8.37537	7.73146	7.19098	7.98996	7.56886	6.85392	7.82169	6.68616	7.38815	7.23755	6.687	6.98152	7.85069	7.28887	8.16469	6.98604	8.07848	7.78142	7.26462	7.09255	6.74797	7.51586	6.18212	7.19067	6.98104	6.65791	6.80398	8.19776	7.93681	8.18606	8.7285	8.93026	8.38149	8.23206
HCFC1R1	7.74833	7.7124	8.21395	7.86838	7.79957	7.67713	7.53656	7.92523	8.18279	7.40256	7.80694	7.88161	7.55543	7.78781	7.93462	7.75911	7.9437	8.24367	7.69958	7.67274	8.07924	8.18353	7.55475	7.86748	8.02655	7.82261	7.77523	7.8223	7.43252	8.04926	7.80597	8.04302	8.28384	8.65227	7.89191	7.92131	7.79998	8.26387	7.71742	7.8465	8.70363	8.27316	8.22201	7.73076	7.48758	7.76984	8.26777	7.53319	7.72048
FBXO34	9.80344	8.15759	8.44544	9.29591	9.21332	8.91554	9.33252	9.26067	8.4904	9.45916	8.85429	8.11244	8.54323	9.10526	8.19683	8.86388	8.41217	7.98737	8.78338	8.54437	8.24471	8.09495	8.2027	8.69684	8.74255	8.80582	8.30343	9.03396	9.10941	9.25171	8.40229	9.44276	8.8828	7.50025	8.79378	7.28307	8.93175	8.3456	8.59214	9.83808	7.91982	8.30078	10.4825	9.67404	10.7163	9.37939	9.58711	9.98509	9.37873
THTPA	7.25171	6.92344	7.7432	7.85912	7.08975	7.69429	7.20986	8.03413	7.77045	7.42287	7.74774	6.98717	7.25267	7.42141	6.92446	7.52213	7.37672	7.24132	7.37504	6.96482	7.38904	7.63859	7.3868	7.10346	7.89817	7.03518	7.40941	7.95429	7.98057	7.23672	7.33203	6.75264	6.975	7.45296	7.50188	7.24376	7.92141	7.44774	7.41493	7.36195	7.3801	7.3186	7.47355	8.02091	8.9487	7.102	8.42606	8.24444	8.06078
TCIM	8.08223	4.19675	5.89198	6.83492	7.76057	7.36764	4.65055	4.91911	4.85582	6.05806	9.09351	5.78141	6.34468	10.4788	7.03086	10.0872	4.60037	7.27903	7.81477	5.16397	5.53596	6.2258	8.91896	3.16855	6.28316	6.21285	3.91677	9.67814	6.15183	6.34019	4.26913	6.11149	3.94241	4.72928	3.01265	6.27677	7.92105	7.6127	4.02039	6.67226	7.2622	7.80043	6.57275	8.73294	6.57563	6.41014	8.76506	9.54358	7.25981
CEP55	9.31704	8.77844	8.10863	8.07543	9.82998	9.00637	9.47979	9.44648	9.34002	10.8465	7.99273	8.94564	6.17448	10.5193	8.89039	9.59274	9.13581	9.16165	8.19228	8.9064	6.11332	8.22054	9.15961	5.73228	9.99436	9.68735	9.20787	9.19938	7.77688	9.27488	7.76639	5.3542	8.69803	7.48666	8.31816	7.99991	8.33873	8.26915	9.3614	8.02159	9.44072	9.42597	9.12124	9.93561	9.31415	8.65338	10.1524	10.3326	9.78833
PARP12	9.21559	8.35584	8.40216	8.48045	7.54378	9.32777	9.404	7.65721	10.6329	8.79454	7.47729	8.32826	7.91245	8.08872	8.90474	7.12838	7.85502	7.83246	7.85376	8.47301	8.22164	7.40022	7.64455	8.07551	10.0702	8.67387	7.31016	8.6504	9.9741	9.05893	8.81073	9.60147	7.85276	7.32219	8.3239	7.8597	9.67797	7.94691	8.40598	8.5401	5.99752	8.33465	9.58327	10.3127	10.5195	9.78201	8.74328	9.98665	9.27939
RCL1	8.09022	8.08587	7.31358	7.92173	7.78374	8.0652	8.13594	7.46595	7.59841	7.54605	7.38618	7.5335	8.10273	7.91699	7.46516	7.51963	7.50159	6.88652	7.21701	7.46792	7.21422	7.36392	7.59441	7.61647	8.10037	7.31808	7.58212	7.50256	8.36646	7.56999	8.25752	7.36633	7.44349	7.63418	8.19285	7.40017	7.39379	7.35946	7.95989	7.88035	7.20275	7.80567	8.84728	7.56673	9.10816	8.3488	7.97133	8.53215	8.78547
CCDC91	8.0069	8.64112	6.44353	6.88511	7.10214	7.22847	7.28638	8.22146	7.83839	8.59622	8.44819	8.03146	7.93047	8.27788	7.26733	8.61785	7.4537	7.63892	8.61871	7.12009	6.82667	6.44737	6.56923	7.0849	7.13727	7.99144	8.02216	8.44252	7.30472	6.27708	6.1762	6.75193	7.49717	7.90926	8.78695	6.10452	6.8367	6.508	7.33392	5.80412	6.80719	6.51449	8.0345	8.69357	9.60065	7.3482	8.99575	8.80876	8.21149
C1orf115	6.66786	6.80759	5.66276	8.14604	6.10259	6.60149	6.11341	6.73523	6.0258	7.12713	6.46493	7.19428	6.56934	6.82888	7.011	6.86627	6.6089	6.55812	7.22707	6.75231	5.86825	6.1152	6.08456	7.80405	6.1922	6.64824	6.71909	6.02111	8.05493	7.42141	7.61077	6.77577	7.06555	6.04023	7.17252	6.48472	6.99204	7.07365	7.71167	6.41204	5.96361	6.7833	8.93532	7.96879	7.73475	6.44532	9.33147	5.48374	6.19655
DHDDS	7.23883	7.43167	7.36149	7.56556	7.2616	7.00092	7.40634	7.6448	7.5711	7.47775	6.74044	7.09295	7.18902	7.2055	7.68462	7.09306	7.07338	7.21283	6.91715	7.19243	7.17893	7.30132	6.78177	6.70052	7.2915	7.50156	7.46743	7.65017	8.01797	7.04781	6.7968	7.50617	7.87886	7.05575	7.12857	6.79992	7.45317	6.84386	6.68038	6.78149	6.15676	6.80078	8.31718	7.68655	7.87554	7.43109	7.1029	7.85538	8.22379
TEX264	8.06305	7.921	6.97456	8.25135	7.67101	7.57989	8.31036	7.04696	6.73157	7.01335	8.11161	7.59184	7.90881	7.57608	6.994	7.23985	7.44137	7.17115	7.60239	7.30503	8.02171	7.55779	7.64069	8.10684	7.91157	7.92578	7.41513	7.80951	8.25308	8.02515	6.88957	8.47627	7.3963	7.32277	7.25829	7.96886	8.32775	7.5652	7.79588	7.69595	6.81285	7.0434	9.31749	8.8716	8.32599	9.10191	8.46445	7.81629	9.22712
RMDN1	7.01767	8.44595	7.43182	7.09278	8.50165	7.88995	7.1277	9.2159	7.80041	7.81638	7.49118	7.94936	6.2573	8.35101	7.74045	6.68483	7.47498	7.38516	8.44308	7.16454	7.27666	6.81867	6.55503	7.33517	8.04672	6.89927	7.91224	8.69444	6.48964	8.59104	7.51484	8.41127	7.11197	6.50523	6.53492	7.30497	7.47876	7.25698	7.1202	6.77528	6.99213	6.63816	7.33407	7.95427	9.92969	8.32748	8.47966	9.09353	9.36443
LRRC20	7.47101	7.77942	7.67722	7.46174	7.61613	7.4202	7.42561	7.76277	7.61207	7.22914	7.6903	7.64397	7.73095	7.46174	7.54538	7.6215	7.90971	7.61116	7.36995	7.37601	7.81659	7.48741	7.71524	7.73772	7.38239	7.44607	7.88301	7.46174	7.14175	7.47579	7.69859	7.4868	7.65143	7.96913	7.72643	7.81062	7.63456	7.68774	7.47294	7.60026	8.46767	7.60279	6.82706	7.775	6.42917	7.13717	7.64449	7.00193	8.03094
ECHDC2	9.0246	8.8664	8.31451	9.40807	8.31096	9.37575	9.31423	8.34942	8.29841	8.40005	8.7037	8.26133	8.55309	9.59288	8.58131	8.96486	8.48674	8.53517	10.1523	8.4786	8.77498	7.2468	8.06396	7.84457	8.79067	8.82325	8.05137	8.70295	9.81083	8.48601	9.25492	9.6149	8.91994	8.20902	8.4063	7.95643	8.81975	8.61647	9.4322	8.62756	7.4845	8.19955	9.64995	8.83684	9.29868	9.98361	8.0819	9.45703	9.06796
ANAPC2	6.28914	6.07725	6.07664	6.5628	6.59039	6.02198	6.10457	6.30556	6.12953	5.95446	6.22822	6.16484	6.19385	6.15264	5.85072	5.95694	6.16107	6.24005	6.02976	6.59229	6.14064	6.24964	6.07401	6.23271	6.16309	6.24064	6.04538	6.29656	6.69379	6.37308	7.13565	6.34796	6.06537	5.87496	6.56139	6.20021	6.23399	6.08708	6.2494	6.72224	6.29048	6.1933	6.31239	7.11503	7.04488	6.65331	6.96591	6.57373	6.71213
ORMDL2	8.6676	8.98315	9.08853	9.04403	8.76898	8.60997	8.05276	8.97119	8.67761	8.9229	8.95285	8.3113	8.29871	8.97156	9.32295	8.77094	8.31848	8.14016	8.72404	8.50371	8.19669	8.14832	8.55364	7.85857	8.97385	8.80927	9.26753	8.70316	7.54325	9.34174	7.78497	8.93907	8.89159	8.37533	8.15412	8.27929	7.80459	8.01506	8.60008	7.46855	8.08078	8.17475	9.05946	10.3385	10.0194	9.61813	10.1333	9.3997	9.62583
NIT2	8.85367	8.63079	7.92603	9.32469	7.99075	9.08154	8.58148	8.61529	8.80034	8.68762	8.7167	8.70531	8.68731	8.25167	8.40824	9.28412	8.68505	7.83768	8.93826	8.50023	8.21761	7.48702	8.10218	7.99422	8.15083	8.04836	8.49051	9.59249	9.25666	8.54698	8.2126	8.77302	8.84758	8.61314	8.2227	7.8213	8.95245	8.39526	7.92091	8.81966	6.91907	8.09567	9.70625	10.1437	10.6132	8.45214	9.71582	10.3083	10.2678
MRPL39	9.04074	9.23492	7.84169	8.00072	7.86206	8.49194	8.77593	8.83438	8.52914	9.21388	8.88094	8.75806	8.73823	8.89531	7.94451	8.79459	9.06818	7.89372	8.98081	8.71802	7.98539	7.83739	7.9289	7.68015	8.29312	8.73143	8.77796	9.02677	8.25827	8.27186	8.09448	8.39423	7.96527	7.89293	8.72863	7.15431	8.07769	8.04254	7.79575	8.21743	7.11567	7.75917	9.70138	8.82752	10.1037	8.86961	9.18055	9.74662	9.56376
MAFB	7.95961	8.80376	7.98789	8.42101	8.86878	9.18698	10.0459	8.93513	8.39237	9.25714	9.5392	9.36755	8.03369	9.28459	11.3187	9.13182	9.36987	9.27977	8.41728	8.88991	8.63129	8.60792	9.19492	7.6716	9.46067	8.34243	9.52048	9.28459	9.71532	9.07907	8.50792	8.95543	7.8632	8.54107	7.92493	8.27273	9.14468	9.47223	6.93949	8.40426	9.0588	8.32449	8.89104	9.27919	10.0081	11.5813	10.3502	9.65961	10.5224
JMJD4	6.5357	6.22569	6.8983	6.74077	5.79766	6.91835	5.60338	6.1282	6.6907	5.89578	6.10306	6.17508	6.27022	6.26871	6.62731	6.34782	6.53813	5.84064	6.58332	7.23823	6.65381	6.70309	6.45258	6.71701	6.22193	7.14224	6.56364	6.57937	6.42994	6.30633	6.43891	6.8198	6.22044	6.13884	6.98062	6.39061	6.8479	6.64358	6.58345	6.32777	6.60394	6.18761	6.93926	7.41695	7.12182	7.07385	7.23165	7.38988	7.29642
LYRM4	7.27414	6.93892	8.13103	10.299	8.34671	7.85283	6.439	8.84571	8.1173	9.95438	8.69537	8.85666	7.26454	9.22401	8.09248	9.67338	8.551	7.44599	8.4993	8.15995	7.32441	8.91632	7.92703	7.94894	7.85805	7.03311	9.82646	9.67785	6.54333	8.22983	6.2748	8.27185	8.96312	6.99184	8.09077	7.77229	6.89852	8.01117	8.02373	6.86906	7.18734	7.67726	8.73173	10.3323	9.93006	8.90608	9.70996	10.2945	9.09877
NDUFA3	8.659	10.0452	9.67965	10.0678	8.54266	9.09343	8.79214	9.11208	8.52592	8.36997	9.14642	8.36942	8.6729	8.90235	9.04558	9.18357	8.90028	8.78551	9.01422	9.71962	8.71296	9.00914	9.14028	9.33563	8.84028	9.48413	9.55257	10.1852	9.67828	8.98277	8.20244	9.56072	8.48944	9.02462	9.18469	8.45744	8.9222	9.39248	9.14323	9.9361	8.28752	8.31261	10.5831	10.0809	10.7795	10.8321	10.2198	8.93867	10.9234
RFWD3	5.87788	5.80999	5.2664	5.60721	6.21489	5.63633	6.22678	5.53853	6.13347	5.99557	6.42808	6.31486	5.86213	6.397	5.35876	7.04998	6.16357	5.58573	7.24237	5.76673	5.26779	5.58972	5.41848	5.34415	5.78928	5.71615	5.316	5.74944	5.68053	5.03046	5.74596	6.28868	5.48084	5.31719	5.56453	5.2533	5.01017	5.14426	5.48344	5.01892	5.41479	5.45294	5.66467	6.78147	6.39694	5.62227	5.65819	6.00959	7.03938
CHORDC1	9.16961	8.9887	8.13605	9.14159	9.51122	8.64221	8.4892	9.57945	8.65152	9.31134	8.96219	9.21962	8.37305	9.01525	9.85409	8.48804	8.79516	8.09417	8.85758	9.13613	7.76125	8.38548	8.64124	8.37912	8.27654	9.15956	8.5706	9.36713	8.65681	8.35161	8.30635	9.26718	8.54311	7.64645	8.27243	7.67238	8.08204	9.46283	9.53243	8.51933	8.44999	8.54272	10.2673	9.09096	10.7292	8.93893	10.5541	10.029	10.1767
DPP3	8.57309	8.49611	8.27898	9.23164	9.00127	8.19801	8.25334	8.24179	8.62035	8.21365	8.39568	8.37686	7.61192	8.48879	8.48959	8.48832	7.99019	8.11499	8.25051	8.57219	7.53405	8.43246	8.28821	7.61246	8.22996	8.68942	8.7354	8.70445	8.89739	8.76099	7.80824	8.55729	8.59669	7.82712	8.13942	8.22022	8.76176	7.67741	8.40165	8.07899	7.84326	7.8365	8.60956	8.99151	8.90018	9.32871	9.50463	8.99572	9.92792
KBTBD4	7.21953	6.80112	6.64064	7.43972	5.70829	6.67513	5.38468	6.96781	6.8526	7.17425	7.09927	6.0833	7.18356	7.46179	5.95197	7.05493	6.52325	6.32208	7.61675	6.29808	6.13003	6.6887	6.75189	6.56159	6.45236	6.6681	6.70733	6.61089	6.62361	6.7656	6.57891	6.13502	6.87912	6.05851	6.7897	6.45916	6.0387	6.52645	6.7089	5.64141	6.45234	5.66816	7.99081	7.1604	7.56245	7.97137	7.68249	7.66426	8.41985
MAGEH1	8.02836	7.2834	7.26328	8.82076	8.52618	8.66837	7.93297	7.96427	6.93413	7.70474	9.82546	7.10363	7.52992	7.5629	8.10615	8.33852	8.26074	7.31834	9.00157	7.01684	7.22132	8.51971	7.62369	8.17639	6.64445	6.98118	7.2435	8.12068	6.90932	6.33222	6.77882	7.61416	8.0107	7.28976	7.42762	6.70855	8.02476	7.98882	6.55086	6.91797	7.02651	7.1462	8.767	8.41263	8.47558	9.46692	9.27448	9.02559	9.25396
LMCD1	8.01231	8.21436	6.82493	8.18991	6.70151	8.3946	8.40007	7.42987	8.52029	7.81715	8.18244	9.20032	7.16791	7.02362	8.26191	7.32883	7.80493	8.01154	7.50889	7.39622	7.32875	7.54373	7.99755	7.70141	7.4237	8.10512	8.92086	7.46921	8.56006	6.82096	6.82197	8.00612	7.1367	7.44227	7.24878	7.69238	7.6403	8.19563	8.10933	8.18906	7.27905	6.79058	8.18707	7.49443	8.20581	9.75841	9.55221	8.08961	10.3726
DUSP12	8.10938	8.38187	7.24386	8.94438	9.00441	8.5393	8.09435	8.30354	7.60532	8.61202	8.62899	7.98294	8.48098	8.17471	7.86981	8.81187	8.09697	7.78187	9.0758	7.79867	7.27631	7.70962	7.61759	7.96251	7.78217	7.61237	8.83225	8.44793	8.27079	8.05494	7.76673	8.18139	8.11352	7.17387	7.67244	7.26232	7.68891	7.606	7.71028	6.93222	8.01886	7.27418	8.82055	8.3434	8.87164	9.17821	9.20616	8.93653	9.81862
LRRC40	7.64939	8.881	7.82231	8.75567	8.58799	8.65611	8.357	8.09423	8.84855	8.924	8.33882	8.18585	7.31022	9.65551	8.36192	9.2541	8.36868	7.59944	9.08536	8.15554	7.33532	8.10984	7.84091	7.98388	8.06756	8.43978	8.62492	8.18451	8.36368	7.95399	8.20854	8.28133	8.11626	6.45095	8.7772	6.84436	8.16373	7.71117	8.35378	7.88159	7.50931	7.17044	9.02645	8.55548	9.6274	9.45494	9.65375	9.57882	9.58611
CDC73	8.26374	8.7174	8.66182	8.24629	8.29523	8.74351	7.63728	9.13652	8.05181	9.63271	8.76302	8.05088	7.66464	8.78395	7.84655	8.7428	8.00722	7.44447	9.08652	7.2461	7.55855	7.49935	8.36734	8.26038	8.33553	8.47146	8.82827	9.12511	8.5336	8.11454	7.34867	8.07104	8.75748	8.36683	8.61219	7.19912	8.40566	7.81739	7.58339	7.7137	7.82928	7.80503	8.32534	8.61695	9.96671	8.70831	9.38845	9.34538	10.2039
DHX35	5.84094	5.61999	5.58853	5.94576	5.88512	5.70577	6.02656	6.3252	6.19827	6.53955	6.42533	6.40385	6.00922	6.2367	5.5941	6.82477	6.13286	5.32178	6.72297	6.27133	5.49572	5.72141	6.4888	6.00382	6.02805	5.98648	7.04613	5.79194	5.98672	5.89696	5.47603	5.61536	6.10583	5.48263	5.92026	5.4515	5.82627	5.79675	5.93612	5.67512	5.46506	6.09592	6.56625	7.1147	7.31053	6.58727	6.84519	6.79005	6.89288
AURKAIP1	9.16501	10.2896	9.94917	10.8929	9.96482	9.70418	9.37789	10.318	9.33619	9.08196	9.47133	8.53409	8.67572	9.53576	9.23467	8.67301	8.67609	9.67672	9.17006	9.80132	9.24555	9.56776	9.0348	9.74403	9.3902	10.0456	9.96316	10.1367	10.5156	10.0828	9.84526	9.93559	9.35637	8.90662	9.4724	9.32669	9.0317	8.67469	9.23979	9.553	7.99706	8.48616	10.6864	10.5215	11.0124	10.4221	10.8436	10.8416	10.383
ABHD4	7.53396	7.97086	7.95254	8.2517	7.76942	8.19964	8.37537	8.08405	7.73765	7.75281	7.99902	8.15087	7.89635	7.85706	7.92254	7.96609	7.83822	7.77121	8.04735	7.97319	8.10645	7.95258	7.93761	8.01073	8.54881	7.73658	7.81871	8.53965	8.07722	7.82426	8.31726	7.69496	8.02433	8.08344	7.70805	8.10546	8.03925	8.00282	7.92351	7.71242	7.82707	7.87183	7.88293	8.3228	8.75732	7.60549	8.53012	7.97433	7.82456
DCUN1D1	9.546	9.72515	9.05258	10.1906	9.72193	9.93668	10.3399	9.00387	10.1535	10.8051	9.8308	9.80382	9.42112	9.83512	9.87434	10.6084	9.29585	9.18961	10.1113	8.97768	9.59445	9.27277	8.69869	8.87552	9.22481	9.5547	9.51901	10.9899	10.7055	9.28127	9.49525	10.2269	9.06984	9.04426	8.47507	8.16233	9.17536	9.79281	9.23916	9.20175	9.41323	9.20803	10.4903	10.3937	10.4208	9.62966	11.1826	11.3663	10.5361
TCTN1	9.12356	8.3471	8.49676	9.09979	8.11912	8.99466	8.16693	8.14259	8.17696	8.58143	9.00656	8.60156	9.59399	8.6486	8.99374	8.60674	8.66663	8.41811	9.31386	8.35653	8.48341	8.6512	8.43691	8.57217	8.25799	8.50084	8.69623	8.54998	7.66217	8.18593	8.31903	7.63418	9.12111	8.37366	8.55632	8.45925	8.33132	8.62471	10.1984	8.18768	8.70998	8.36539	8.14922	9.16222	9.96991	8.33131	9.3923	9.15586	9.09118
DTL	7.53902	8.30071	7.4972	7.46532	7.74093	7.66895	7.58724	8.00028	7.87503	7.81739	8.05687	7.41462	7.18549	8.67573	6.95892	9.4983	7.71385	7.46746	8.36363	7.54333	5.94705	8.0364	7.41027	6.50481	7.0941	7.76152	8.45365	7.17887	7.3061	7.15065	7.41749	6.82287	7.42487	6.00645	7.05377	7.22487	6.9564	7.27394	8.1405	6.37014	8.63581	7.39949	8.27332	7.90822	8.9614	8.7417	9.20791	8.55222	8.86843
MRGBP	7.23557	7.22298	7.39727	6.87668	6.30129	7.11158	6.84489	7.51222	8.24166	7.38858	7.75195	7.76104	7.10609	7.33225	7.05802	6.76009	8.26804	7.15969	7.3534	7.90691	6.96196	7.46957	7.13309	7.31237	7.16552	7.38184	8.15055	7.40288	7.23886	7.19116	6.65653	7.46817	6.98225	7.39146	7.14775	7.39804	7.36614	7.08831	7.23401	7.14936	6.80261	7.19084	7.49001	8.44746	8.33153	7.71679	8.54587	8.21322	8.4497
FAM114A2	6.1026	5.88961	5.86324	5.99823	5.3885	5.99307	6.30662	5.87134	5.78572	5.85555	5.92396	5.91221	5.95709	5.63686	6.63288	5.83185	6.21156	5.7445	5.60048	5.78671	5.99227	5.7854	5.63404	5.7805	5.99667	5.73829	5.89278	6.05509	6.33192	5.88074	5.70333	5.91522	5.95965	6.01778	5.77728	5.77388	5.79191	6.28191	5.60239	5.5225	6.00637	5.8724	6.5127	6.50915	6.65643	6.60257	6.17362	5.99437	6.32042
LPAR6	7.86787	7.15645	6.30231	7.11229	6.34779	8.02187	7.11098	5.37807	6.96379	6.10428	6.3115	7.15536	8.32754	5.54337	7.56319	8.21142	5.09685	6.37289	10.035	5.63892	7.28263	5.97876	6.71382	5.05592	6.72523	7.9821	5.28726	5.90284	6.8642	6.36919	7.72794	9.38474	6.35164	7.20855	6.16095	6.37294	6.69796	8.21359	7.18434	6.68572	6.55837	6.87913	8.88399	6.18607	8.29145	8.40465	6.88952	6.99235	7.14215
TWNK	8.0656	6.65219	7.28875	8.00705	6.76743	7.39938	7.31165	6.98989	7.7415	8.5017	6.9627	7.45699	7.90475	7.26693	7.26516	8.0354	7.54583	6.5145	7.11451	7.25365	6.66634	6.95028	7.74389	8.17599	7.65941	6.90078	8.65025	7.83924	7.91474	7.06469	6.69382	6.53734	7.75216	6.72088	8.10055	6.43001	6.65678	7.09482	7.63531	6.66001	7.07204	7.11811	8.77797	7.94356	8.75406	8.04152	8.82493	8.58803	8.05662
HDHD5	7.86076	8.41744	8.11755	9.15762	7.71788	8.43658	7.09431	8.29581	8.1591	9.15517	8.26867	8.83879	7.7109	8.20422	8.17763	8.816	7.91485	7.98432	7.05314	8.03808	7.27861	8.49928	7.11551	7.662	7.76602	7.63032	8.31782	8.86723	9.18433	7.55865	6.94685	8.65728	8.31071	8.01513	7.66071	7.35185	8.68927	7.50302	7.80899	7.67496	7.67994	7.40153	9.40007	9.26731	8.91282	8.50419	8.51506	8.39359	9.5504
RBM28	7.74142	8.41848	8.33082	8.77624	7.76187	8.01205	7.79545	8.08515	8.76686	8.14877	7.4675	7.59492	7.09551	7.80659	7.23215	7.88225	7.6944	7.73955	7.69831	8.03081	7.36899	7.68938	7.31266	8.15335	8.36407	7.4961	8.42053	8.02059	7.95727	8.23977	7.52578	8.1888	7.87823	7.51703	7.89538	6.90332	7.03661	7.68883	7.5493	9.19967	6.59309	6.96786	7.99727	8.58953	9.6475	8.6228	8.1676	9.66608	9.31641
HEATR1	9.92609	9.74729	9.85382	10.2751	9.3439	10.1502	9.11198	9.64379	10.0657	9.65707	9.9138	9.90963	9.51691	9.50343	9.64888	10.2307	9.63016	8.69257	10.327	10.597	8.82146	9.31517	9.25138	9.80914	9.48693	8.58326	10.6779	10.0187	9.87891	8.81496	8.69889	9.97426	9.76602	9.27733	9.33802	8.41917	9.91994	9.46379	9.60086	9.62579	8.92095	9.24437	10.4722	9.95149	11.0623	10.0857	10.2251	11.1576	11.0541
CISD1	7.54231	8.07915	7.24741	8.2963	8.22793	7.62543	7.0951	7.20637	6.83819	7.26685	7.74939	7.302	7.58941	7.87845	7.60669	7.4755	7.55058	7.29678	6.55392	7.0261	7.0498	7.22543	7.1444	7.49405	6.68254	8.3361	7.39078	7.98065	8.98987	8.24829	7.5314	7.0159	7.37607	6.7086	6.5795	6.78879	7.76123	6.88786	7.18203	6.2441	6.88622	7.0237	9.34299	8.35133	8.98092	9.58762	8.56564	8.41718	9.464
RINT1	6.04882	7.54999	7.09536	7.2897	6.32799	6.54332	7.73444	6.14558	7.32906	6.75809	6.82175	6.71589	7.3864	7.09137	7.03375	7.27962	6.35355	6.69066	7.6782	6.53747	6.41552	6.38637	5.91028	7.20397	6.69291	7.8346	6.83781	6.70339	7.24095	6.85063	6.53137	7.88167	6.67421	5.60325	6.77983	6.03089	6.46935	6.71067	6.02895	7.15141	5.62682	5.29168	6.98991	7.66831	8.04442	8.16575	7.7347	8.4014	8.36438
REC8	9.10926	8.28289	8.27211	9.22677	8.83037	9.04648	7.5399	9.7041	8.58477	8.46068	8.6756	7.75025	7.90339	7.95045	7.46951	8.13898	7.6828	7.8131	8.03064	8.53952	8.15497	8.05461	9.14676	8.29192	7.91871	8.03169	8.43153	9.01764	8.53494	7.50562	9.06356	7.13569	9.00404	8.13266	9.26865	7.71327	8.1585	8.03696	8.17528	8.24597	8.08924	8.07535	10.2346	9.0612	9.49004	7.97918	10.4948	9.98276	6.92346
LIMD2	5.61883	5.75564	5.70346	5.78843	5.68446	5.55344	5.39493	5.46141	5.82459	5.21885	5.76353	5.80369	5.55727	5.48458	5.73926	5.44767	5.82663	6.00031	5.49501	5.45107	5.78898	5.75086	5.89331	5.62086	5.48377	5.60072	5.71829	5.27779	5.44012	5.77621	5.86131	6.01737	5.94537	6.47281	5.74683	6.37958	5.90815	5.71237	5.62086	5.65004	6.37174	6.41056	5.97009	5.98812	5.75176	5.40064	6.27782	5.62086	5.42482
URGCP	8.93437	8.82646	8.45488	8.98953	8.59858	8.73984	9.02227	8.39987	8.74737	8.77981	8.64254	9.24475	8.93315	8.75705	8.56944	8.33367	8.39866	8.10846	8.74241	9.04657	8.56547	8.53439	8.11425	8.94671	8.48723	9.13278	8.43793	8.78273	8.45991	8.83231	8.31246	8.97235	8.56257	8.84429	8.5563	8.22947	8.95349	8.26128	8.80421	9.21078	8.00815	8.19733	9.79126	9.41628	9.28356	9.44392	9.40781	9.61894	8.59405
HECA	8.51502	8.96829	8.50796	9.86957	8.95798	9.42257	9.11692	8.78613	8.63247	10.2924	9.14709	9.41167	8.63627	10.1786	9.1936	8.62269	8.43856	8.29133	8.15163	9.41863	8.3806	8.93395	8.37577	7.04578	8.61143	9.73232	8.72311	9.70075	9.10702	8.98077	8.65782	9.10947	8.84949	8.40186	8.30512	7.6873	8.35368	8.93112	8.64231	9.03777	7.73451	8.27543	8.77707	10.0495	9.88716	9.65439	10.035	9.69977	9.3002
LEMD3	9.74836	9.33246	9.04007	9.62569	9.73567	9.41762	9.76086	9.43031	9.31194	10.5106	10.5041	9.72985	9.54554	9.52652	10.122	11.0672	9.40119	8.90571	10.3197	9.08103	9.30586	9.15898	9.12046	9.1097	9.02025	9.92783	10.4456	9.64418	9.1857	10.0933	9.22136	9.1395	9.17003	9.321	9.18874	8.83379	8.85287	9.3584	9.52843	8.96095	9.91138	9.36735	10.3934	10.7175	10.8182	10.7191	11.3476	10.823	10.5991
TFB2M	8.69855	8.88281	8.53617	9.24547	8.20206	8.69503	8.16493	8.46296	8.70789	8.37564	8.90326	8.94016	8.74663	8.9353	8.88089	9.46958	8.59458	7.23409	9.61351	8.96114	7.73024	8.30983	7.89056	7.96035	7.67592	7.59784	9.15198	8.97923	8.3657	7.89085	8.04448	8.73603	8.54436	7.55936	7.88623	7.0841	8.43356	7.70925	8.12061	7.32522	7.81987	7.13116	10.0153	9.27169	10.2746	10.1514	9.73343	10.5041	10.4084
ZDHHC7	8.60929	8.53624	8.17581	9.33949	8.93104	8.39419	8.36906	8.11325	8.5793	8.86353	8.14011	9.24715	8.28474	8.54671	8.89473	8.60626	8.30878	8.44748	9.2628	8.39665	7.93749	8.52957	8.10582	8.51183	8.07954	8.28901	8.18069	8.37966	9.02765	8.38663	7.79197	8.83921	8.03556	7.87738	7.95532	7.78089	8.34118	8.37012	8.05335	8.35197	8.29549	8.1242	9.15225	8.94882	8.27014	8.48647	8.07732	9.205	9.14747
ATP13A2	5.5075	5.70473	5.38535	5.72382	5.25068	5.29702	5.57018	5.63847	5.35257	5.95747	5.81425	5.97562	5.38854	5.78317	5.67216	5.87763	5.66966	5.68373	5.61822	6.05967	5.7444	5.6424	5.78441	5.19214	5.24116	5.40807	6.18939	5.2574	5.55205	6.18767	5.33821	5.03491	5.10866	5.77114	5.35724	5.16039	6.13303	5.78755	5.76361	6.13252	5.72934	5.83378	6.68825	6.85952	6.35097	6.24614	6.58513	6.25457	6.63724
NUDT2	7.19914	7.46472	7.38909	7.13231	7.26991	7.99899	7.12181	7.22604	7.07687	6.60808	7.2921	7.24488	7.77957	6.91053	6.70802	6.76502	6.98512	6.74426	6.95246	6.88845	6.67627	6.42671	7.18552	7.65529	7.23829	7.80796	6.82656	7.70417	7.90265	7.13299	6.96695	7.91121	7.02964	7.08439	6.90564	7.13678	6.93059	6.78773	6.7225	6.60595	6.12676	6.47466	7.65182	7.00072	7.56937	7.01034	6.14337	7.79524	7.56013
IER5	8.64649	7.58241	8.03507	8.01242	8.92282	8.87328	8.85482	7.93169	8.7884	8.42875	7.82795	7.34487	8.69476	8.12369	8.70238	7.32155	8.57508	7.56674	7.30416	7.74951	7.91154	7.28367	8.23999	7.24104	8.95879	8.26551	8.76996	9.09447	8.14223	8.15487	8.13299	7.21826	7.55221	6.32278	7.35214	8.09007	8.45024	8.60201	7.31765	6.95525	7.35958	7.93963	9.89608	8.96039	10.012	9.93048	8.78572	9.04576	9.99028
TSSC4	6.99116	5.91076	6.20796	6.76737	6.86161	7.00286	6.1884	7.46692	6.64058	6.3215	6.72507	6.60128	6.44345	6.63563	6.66089	6.70192	6.82676	6.34969	7.05687	6.90105	6.70594	6.84454	6.44238	6.69343	7.12903	6.31707	7.0815	6.77081	6.31879	6.80605	6.79636	7.06925	7.03131	6.8669	6.86003	6.49327	7.00331	6.80274	6.80264	6.83758	6.43699	6.4871	8.0922	8.21554	7.79563	7.50277	7.62679	7.84703	7.26839
PSD3	6.93149	7.99166	7.45698	7.84053	6.90121	7.33878	8.14678	6.64189	8.15757	8.55486	9.27442	7.65399	7.37434	8.13115	8.68557	9.47164	7.62165	7.306	8.29469	8.16962	7.00707	7.55207	7.57645	7.76826	7.29131	6.85152	8.17752	7.08652	8.02863	6.52168	6.9662	9.14216	7.68047	7.00393	7.24363	7.42932	7.73537	8.62561	8.67456	8.03475	7.99603	8.8099	6.77696	7.3884	9.07144	8.14219	8.72407	6.84969	8.29469
KIAA1551	11.0063	10.0878	9.19801	10.6767	11.2598	10.8736	8.9828	9.97309	9.91114	11.9316	11.3245	10.0717	10.0783	11.8627	8.95576	12.2699	9.91116	9.71337	12.4328	8.85065	9.80159	9.72855	10.077	9.70107	10.8791	10.8063	11.3914	12.4854	10.8401	11.033	9.65124	10.9189	9.88794	7.9353	11.0268	8.9044	8.73084	10.0883	9.21713	8.54333	9.76594	8.95806	12.3759	10.4425	12.4969	11.4585	11.7293	12.9459	11.257
INTS12	6.66248	6.88477	7.4958	6.95405	6.27576	7.05845	6.83324	6.90617	5.90039	6.53374	6.76404	5.82594	6.24748	7.09281	6.67236	6.44424	6.47318	5.22778	6.71899	6.24334	6.27941	7.06514	5.91008	6.47247	6.93242	6.56583	7.43759	7.11899	6.00129	6.82333	6.44424	6.68994	6.5408	5.96341	6.63121	5.46341	6.90149	6.456	5.91551	5.8963	6.00448	6.03457	6.95241	7.04905	7.78041	7.07469	7.2512	7.33113	7.39643
TRIT1	9.31634	9.24313	8.60842	9.12576	9.43515	9.26197	8.67236	9.16295	8.81664	9.41516	8.88151	8.73722	8.79873	9.80957	8.403	9.28562	9.09549	8.48328	10.1986	8.78791	8.29571	8.41609	8.66588	8.30854	10.5147	9.52683	9.52394	9.75038	9.25272	8.61691	9.59501	9.48894	9.33868	8.39606	9.0595	7.92082	8.86302	8.54688	9.73069	8.6568	7.62194	8.82643	9.85159	10.7339	10.2788	8.93296	9.88401	10.5749	9.81513
SUV39H1	7.26268	6.56257	6.95449	7.12934	7.14081	7.27772	7.14546	7.22589	7.38908	6.9774	6.9785	6.902	6.66846	6.86917	6.76811	7.22098	7.53975	7.01163	6.92415	7.31122	6.79134	7.16767	7.02595	7.05805	7.25977	7.30787	7.13825	7.13825	7.1646	6.90724	7.36755	6.58999	6.65563	6.7724	6.74307	6.68399	7.12579	6.94445	7.43905	6.87592	7.31471	6.80988	7.78376	7.38255	7.4661	7.63093	8.26114	8.37189	7.83305
NUP37	9.21063	8.10696	8.66974	8.84877	8.33095	9.49497	8.09356	8.90812	9.10903	9.21063	8.61469	8.26786	8.12206	8.60223	8.20909	9.4442	9.0314	7.90007	9.93252	8.13977	7.74945	7.89936	8.97508	7.79211	9.49964	9.29403	9.70875	9.14897	7.46083	8.29823	8.30941	6.83027	9.14509	7.50982	8.89802	6.94711	7.49877	8.1056	8.8205	6.65497	7.3447	7.61536	10.054	9.2344	10.6123	9.77424	9.80617	11.3273	10.6491
NSG2	6.93063	7.04348	6.73056	6.97161	7.14864	7.06889	6.52834	6.67519	6.86289	6.70452	7.25488	7.29431	6.80297	6.74397	7.38676	6.72777	7.50784	7.96228	7.00683	6.90342	7.12707	6.76913	6.80624	6.93077	6.82499	6.8307	6.72166	6.18837	6.35441	7.13624	6.89072	6.92598	7.22864	7.64884	7.05408	7.37722	7.02203	7.64116	7.1439	7.18245	6.94677	7.71769	5.96054	6.41929	5.85906	5.8994	5.57378	6.2134	6.45014
NRN1	5.61154	4.69032	5.0033	4.14822	6.13819	4.87061	7.42128	4.92759	4.90528	4.59353	9.03131	4.65762	4.72758	4.93627	4.97592	4.68038	4.9956	5.07304	4.70468	5.09006	5.2463	5.64457	5.05242	4.85979	4.71378	5.00064	4.87147	5.29994	4.47982	5.36265	5.61023	4.54725	4.90335	7.8483	5.44294	5.20941	5.38696	5.19087	4.32317	5.11749	5.85932	6.76449	4.54535	4.2879	4.35701	4.80807	4.54137	4.38751	4.61413
EIF4ENIF1	7.43376	8.13679	7.61381	8.04331	7.04655	7.61541	7.38823	7.27108	8.14347	8.80595	7.55042	7.40519	7.44924	7.58801	7.9383	8.16971	7.7503	7.13453	7.00169	7.35602	7.24268	7.81327	6.99974	8.05166	8.15772	7.17001	7.62314	7.96798	8.74877	7.68289	7.2197	7.66778	6.99309	6.17064	7.15575	7.09847	7.35117	7.36726	7.88789	8.04811	6.84784	6.94689	8.46759	8.78252	8.61022	8.75326	9.42713	8.79107	9.10987
DRAM1	9.16966	7.55712	7.87324	6.76988	7.63615	7.66078	7.89033	6.38631	6.76668	7.44537	6.92707	7.45969	7.63943	7.43556	8.34611	7.47835	8.22673	7.17062	7.47839	7.47474	7.35579	7.19533	8.35109	6.24205	8.11235	8.07872	6.8567	8.39474	6.78702	7.31041	7.73448	7.66402	6.64569	7.83857	6.99403	7.2222	7.55651	8.1501	7.64989	6.43173	6.77502	7.37469	8.27466	8.27591	6.74236	8.36061	7.43734	8.47543	7.57538
WASHC3	7.83066	6.24685	7.23459	7.8817	6.55372	7.30982	6.54344	6.82947	6.59154	6.6447	6.85807	6.59211	6.70913	6.32424	6.61449	6.95912	6.83378	6.59544	7.52169	6.73905	6.40314	6.36652	7.53507	6.19148	7.5479	7.91564	7.0613	7.70573	6.35804	6.06072	6.48249	6.81733	7.57558	6.29072	7.28298	6.34173	6.66888	6.85307	7.39076	6.47344	6.14802	6.25799	8.60028	7.97377	8.16295	8.05965	7.29261	9.01123	9.53372
SMO	6.36847	6.7367	6.51169	6.21123	6.55766	6.59402	6.58245	6.44606	6.82086	6.53394	7.05096	6.63362	6.95559	6.70095	6.64993	7.08376	6.90378	6.45778	6.87055	6.61619	6.85665	6.4552	7.08509	7.15989	6.45244	6.443	6.94305	6.59903	6.52952	6.65091	6.71803	6.65912	6.92269	7.05683	6.96149	7.41279	6.95861	6.81845	6.84928	6.62949	6.8494	6.8269	6.71357	6.87975	5.90349	6.39418	6.56119	6.92258	6.82945
AVPI1	7.67934	7.28572	7.88099	7.84732	7.50838	7.7578	7.84218	7.778	7.95153	7.26413	7.60573	7.87004	7.75145	7.58371	7.79196	7.43436	7.85857	7.77848	7.17455	7.73038	7.98366	7.95497	8.00136	8.29128	8.02549	7.70671	8.32764	7.44453	8.34863	8.15624	7.92412	7.72665	7.90443	8.31419	8.31356	7.97914	7.57945	7.38405	7.55208	8.04296	8.25289	8.39356	7.94447	8.52507	7.60254	7.78443	7.36606	7.37371	7.38925
HECTD3	6.41701	6.40754	6.90223	6.41881	6.77075	6.48187	6.96635	6.38244	6.72298	6.17062	6.67677	6.80321	6.37209	6.77741	6.65317	6.4106	6.79336	7.13073	6.97309	6.96209	6.98152	6.81164	6.72969	6.6536	7.5563	6.71722	6.52769	6.5363	6.66277	6.79618	6.84048	6.34387	6.74075	6.88843	7.29561	6.64829	6.90464	6.80681	7.29511	7.08542	6.93301	6.78937	6.92294	7.69436	6.73675	6.642	6.33636	6.27529	7.29371
ABHD10	8.72397	8.78465	8.10753	8.8878	9.00265	8.24907	8.86145	8.87177	8.81286	8.64581	9.03016	8.19191	9.17629	8.39583	8.76273	9.71	8.72963	8.05178	9.29401	8.39188	8.99357	8.28722	7.7579	8.78189	8.49593	8.80658	8.58638	8.72848	9.46517	7.8892	8.55641	8.74069	8.36779	9.06194	8.02351	7.90313	8.99025	8.46255	8.40281	8.50081	8.10521	8.30607	10.0231	9.41753	9.76704	8.9854	9.53148	9.30899	10.5489
PHLDA3	6.54923	6.59571	6.73766	5.95738	6.92471	7.15601	6.48226	7.13203	6.31746	6.39568	6.69668	7.34235	7.70659	6.98947	6.72716	6.76332	6.55142	6.91171	7.4833	6.77995	7.15899	6.88304	6.60956	6.57696	6.72563	7.37228	6.84085	7.90712	7.51795	6.90032	6.31097	6.67525	7.08095	6.98164	6.77129	6.46639	7.60857	6.86319	6.95729	6.43625	6.69544	7.05672	7.53555	7.58964	6.82368	8.00422	7.36095	7.5387	8.30342
MAN1B1	8.11728	8.26364	7.34288	8.31415	7.5494	7.54329	8.20974	7.52999	7.41253	8.47272	7.78215	7.13958	8.28233	8.1495	7.69689	7.9896	7.58923	7.31264	7.76533	7.89348	7.85055	7.88257	7.56573	7.53249	7.81776	8.34109	7.788	8.52276	8.9547	7.91584	7.93909	7.97313	7.64804	7.35818	7.68843	7.53314	7.99682	7.74879	7.52241	7.46094	6.9345	7.38498	8.30855	8.96823	8.77233	8.49992	9.34359	8.26429	8.4454
IMPACT	7.8201	7.60443	6.62013	7.41189	6.10967	7.68141	7.06587	7.02244	6.73912	8.28619	8.39972	7.49318	7.8762	8.57321	7.02094	8.0443	7.03388	6.09928	8.24673	6.77168	8.0015	6.75971	6.32496	10.3113	7.88274	7.13613	8.40235	8.10835	7.84871	7.48148	6.84537	8.2274	7.39457	7.07798	7.09414	6.48641	6.96265	6.84394	7.67279	6.82467	6.21238	6.84634	7.33305	8.4318	8.78759	8.00834	8.53137	8.36657	7.93478
ZXDC	7.48006	7.77274	7.0463	7.6953	7.48006	7.02748	7.39741	7.62568	8.04999	7.6473	6.72903	7.72035	7.26114	6.52751	7.35614	7.64505	7.48006	7.65353	7.45219	7.64076	7.66578	6.87883	7.05397	7.52931	7.50984	6.80039	7.25369	8.32429	7.66549	7.51123	7.50511	7.77236	7.53178	7.48006	7.35509	6.84277	7.3649	7.44302	7.06587	7.8724	6.75572	7.20846	6.64404	8.34359	8.58381	8.11096	7.93008	8.27427	8.39195
PLEKHF2	7.54807	8.61756	7.52604	6.2045	7.34315	8.51407	8.91444	7.12784	8.24609	8.13918	6.67044	8.2204	7.96516	8.48273	7.85972	7.16957	7.32447	6.47685	7.7441	5.94397	7.93774	7.37013	6.30356	7.50401	7.4138	7.68605	6.40644	7.88252	8.85923	8.27271	7.90257	8.52758	5.19035	6.08074	5.20861	6.67348	7.41202	6.86131	6.53543	6.73464	6.81556	5.89083	8.22584	8.09045	9.76089	10.0508	8.32383	8.51746	8.71865
C11orf95	8.28356	7.38475	6.55315	8.08248	8.7141	7.25562	7.16648	7.82036	7.12581	9.50077	9.07653	7.57679	8.0639	7.61086	8.35829	8.75519	7.95273	7.42934	7.49239	7.24048	7.75028	7.88296	7.81361	8.08313	7.61921	7.81483	8.36968	8.57321	8.79125	7.5423	7.99013	7.69824	7.70393	7.33048	8.43194	7.47068	7.64291	7.72596	7.71004	7.17309	7.84339	7.47676	9.83477	8.24235	7.9652	9.38906	10.4159	9.07025	9.83065
CHCHD7	10.4402	9.66602	8.84942	10.7917	9.47593	9.60571	10.1324	10.0868	9.82969	10.8248	10.4612	9.93306	8.23914	10.2012	9.60736	10.3278	9.4634	9.23034	8.92281	9.94986	9.17938	9.89549	9.89771	10.5084	8.88071	10.2051	9.6453	10.0972	10.0622	9.14199	9.26012	10.1842	9.68532	7.92763	11.2859	9.24627	10.4948	9.2566	9.01973	9.24354	9.481	9.41795	10.8094	9.49325	11.4744	10.6291	10.1067	11.0236	10.6902
PLEK2	7.54426	7.85818	8.37106	8.05686	8.08811	8.16523	7.8278	7.94725	7.71877	7.40462	7.76641	7.87579	8.36701	7.27881	7.94742	7.58455	8.40156	8.22202	7.95509	8.02375	7.97031	7.61868	8.29733	7.77968	7.921	7.77616	8.29545	7.96377	7.59191	7.38569	7.93879	7.92946	7.70301	7.97486	8.04555	7.96854	7.84514	7.70688	7.46504	7.82999	8.56894	8.31052	8.45651	8.01913	7.12468	7.11629	6.71841	7.37599	7.3198
ZNF277	7.41983	8.41858	8.05562	8.77355	7.14357	7.92419	8.07078	8.64535	8.03762	7.87375	7.35808	7.91782	8.48484	8.99263	7.77936	8.30829	7.92188	7.71923	8.34971	7.29644	7.45251	6.9355	7.90037	8.35283	8.03291	8.24907	8.04839	7.15562	7.84709	7.40478	7.50438	9.1724	8.16585	7.95125	7.8726	7.6132	6.74601	7.34419	7.3954	6.92783	6.59394	6.48955	9.759	8.16554	9.08415	8.44947	7.08795	9.52779	9.34625
HPF1	9.60157	9.36776	7.84056	8.50722	8.52695	9.35979	9.69712	9.1672	8.52381	10.2227	9.20099	8.21374	9.02065	8.98316	8.98756	9.79331	9.7002	7.75342	9.38584	9.25819	8.30906	9.17469	8.65636	8.78287	9.24056	8.9545	10.1113	9.13396	8.67249	8.56716	8.85342	9.36583	9.06832	7.81615	8.47912	8.03177	9.39455	9.30616	8.67668	8.1136	8.53624	8.21078	10.136	9.83385	10.0365	10.9531	9.82737	9.86013	10.8586
YRDC	9.01002	8.53813	8.21387	8.61866	9.81094	9.1522	8.79757	9.08547	8.77727	9.51945	8.8503	9.14338	8.38504	10.2138	9.08198	9.25957	9.0821	8.83133	9.98093	8.21272	8.1573	7.86784	8.30655	7.98634	9.59385	9.68687	9.47282	9.21736	9.03006	8.66529	8.70054	9.38908	8.3905	8.38053	8.94911	9.03502	8.4329	7.78901	8.87329	8.4882	8.10135	8.55466	9.58335	10.8666	9.15337	9.24434	9.22684	10.8949	9.51766
CRTC3	8.94489	8.53047	8.38973	8.70991	7.82166	8.85824	8.69595	7.56413	9.07845	8.56165	8.64227	8.87556	7.75181	9.64373	9.06145	7.67968	8.02105	7.76972	8.78065	8.53203	8.61863	8.733	8.28401	8.09017	8.30248	9.63827	8.35034	9.36353	9.02137	9.57674	8.23867	9.4629	7.56981	7.67025	8.1419	7.88198	8.94651	8.33425	9.24413	8.56558	7.88866	8.09847	9.66257	10.3342	9.07905	9.84364	10.4377	10.1264	9.31932
NEMF	9.93715	9.49295	9.34359	10.1767	9.85785	10.1092	10.6142	10.7057	9.44228	9.69051	10.2028	9.29609	9.37798	10.2247	9.16807	10.0952	9.75767	9.45397	10.4371	9.61969	8.84837	9.37824	9.41449	9.88193	9.87279	9.47542	10.1238	9.7151	9.69683	10.0894	9.62855	9.5284	9.60677	7.949	9.2738	8.40245	9.8253	9.56071	9.34822	9.60557	8.93132	8.91339	10.749	9.96824	11.1342	10.5869	10.1823	11.6381	10.8027
PIGG	8.00786	7.76293	6.31981	9.28701	8.0066	7.77002	8.30034	8.89048	7.6817	7.53559	8.71835	7.18954	8.03997	8.73487	7.53294	7.7774	7.19466	6.90804	8.90991	7.36873	7.88412	6.91378	7.00155	7.44806	8.38668	8.33889	8.63338	7.87807	7.81005	7.97124	7.24317	8.80922	7.83863	6.52379	7.39503	6.94549	8.01933	7.55678	8.51064	7.95025	6.32726	7.44972	8.04825	9.1625	8.64763	8.52681	9.9115	8.42884	9.68168
SLC25A15	7.70583	7.63982	7.39927	7.39564	7.53917	7.60542	7.32238	7.46687	8.14458	7.6803	7.54868	7.63742	7.28426	7.70193	7.34609	7.672	7.59379	7.47492	7.30072	7.58358	6.98424	7.81394	7.11241	6.97593	7.05472	7.52441	7.81499	6.5932	8.00976	7.40841	6.9731	7.76153	6.99974	7.17355	7.20575	7.68419	7.49297	7.27747	6.69643	7.69973	7.45567	6.96416	8.05157	7.47047	6.98452	7.22381	7.26444	7.93002	8.11304
MRPS33	9.13006	9.02621	9.20904	10.2158	8.92655	8.49965	9.3187	9.00943	9.71196	8.87158	8.74682	8.47961	9.53829	9.04948	8.45895	9.08867	8.67639	8.48136	9.2762	8.67516	8.82443	8.81138	8.22349	9.44425	9.10534	9.88663	9.09355	8.60151	9.06961	9.33851	8.88681	9.48978	9.0873	8.65819	8.4969	8.36443	8.58532	8.17274	8.51591	8.18949	7.57845	7.39549	9.72576	9.47016	10.4236	10.6568	9.51731	10.4322	11.3613
CWC25	6.67758	6.9261	6.68092	7.02589	7.09285	6.83136	6.70271	6.55208	6.63984	6.75354	6.79889	6.52887	6.54703	7.19561	6.95622	7.00717	6.78741	6.57768	6.61613	6.76623	6.98612	6.81154	6.38141	6.97313	6.8881	6.7279	6.71107	6.75206	7.11707	6.86933	7.06509	6.80208	6.78836	6.92683	6.39934	6.30688	6.91156	6.49089	6.26648	6.50082	6.20793	6.83282	6.387	6.91156	6.8431	6.8908	7.71892	6.9271	6.5806
LHFPL6	5.45986	6.89063	5.88153	7.71845	5.90361	6.96857	8.19866	6.21066	5.21754	7.02658	5.55333	5.8139	4.71682	6.29116	9.43333	5.41033	6.79675	7.03762	5.89952	6.40477	7.34617	6.03115	6.30088	5.40356	7.0345	6.29368	6.03566	5.19717	6.1533	5.01054	6.77388	8.54781	6.91197	7.76957	6.06691	7.97959	7.41897	8.24836	5.77885	6.83845	7.61903	8.07834	6.00787	6.73971	7.50465	8.84022	7.32449	7.10488	6.82834
RAPGEFL1	4.9731	5.11775	5.11511	5.43953	5.14021	5.1348	5.05232	5.10094	5.05505	5.21829	4.94591	5.00653	5.51954	5.14162	4.9836	5.087	5.16723	5.26647	5.34569	5.08262	5.43044	5.12661	5.24039	5.40408	5.16877	5.34537	5.25479	5.52932	5.44348	5.14669	5.22609	5.35241	5.3703	5.41738	5.36332	5.1067	4.85602	4.95326	5.4981	5.9583	5.21896	5.15491	6.05147	6.60984	5.71374	4.99788	5.852	5.34537	5.64203
ASXL2	9.30126	8.40493	8.00457	9.04307	9.00978	8.68888	8.08851	8.55228	8.51431	8.29491	8.40449	8.646	8.77458	7.95795	8.31238	8.64277	8.48725	8.45419	8.66749	8.15528	7.72172	7.99877	8.00873	8.56835	8.44028	8.34072	8.58195	8.68174	8.23401	8.46379	8.04339	8.34625	8.06953	8.13303	8.1822	8.13574	8.19338	8.13935	7.76556	7.9339	7.69636	8.12774	8.53563	8.30035	9.10866	9.26805	8.45613	9.00909	7.95249
DYSF	5.87111	6.45747	6.39548	5.6558	6.28043	6.24575	6.38095	6.3166	6.35947	5.69058	6.0458	6.26732	5.94645	6.18402	6.56472	6.45331	6.20208	6.33435	6.08719	6.48643	6.53571	6.18846	6.05988	6.18402	6.6465	6.06166	6.24362	6.17637	5.60838	6.34871	6.43355	5.63813	6.12501	6.58578	6.23651	6.38762	6.63223	6.3349	6.53983	6.23194	6.18661	6.52989	6.63717	6.05504	6.00221	5.94323	6.62464	6.30306	5.94927
NCAPG	6.71433	7.18942	6.16176	7.09512	7.90995	6.91539	6.34451	8.24856	7.0217	6.44904	6.34583	5.67834	4.5105	6.97806	5.69875	6.34184	7.20228	7.1348	6.53686	7.01346	5.77809	6.08075	6.92667	5.59595	7.83493	6.71433	8.27233	6.26801	6.29982	6.73293	7.44367	6.66057	6.82134	4.70775	6.57534	6.77733	7.70546	6.79206	7.776	6.62502	6.78664	7.01752	5.72794	8.01156	8.10234	6.72781	8.11544	7.70372	8.44368
MECR	6.51688	6.79325	7.06332	7.06751	6.47017	6.42232	6.75789	6.6825	6.45252	6.26206	6.28899	6.25608	6.64594	6.5261	6.5998	6.52326	6.51405	6.44872	6.35684	6.22286	6.3427	6.25248	6.51541	6.28746	6.15368	6.87278	6.57881	6.75387	6.62612	6.47609	6.21992	5.87999	6.85084	6.8923	6.83537	6.35625	6.40763	6.42908	6.34351	6.45146	6.1523	6.73787	7.30284	6.58535	7.58976	6.9854	5.96341	7.0161	7.3582
FZD4	9.05557	7.89709	7.49944	8.64939	7.83976	8.12654	7.59189	7.36482	8.27161	8.03576	8.07131	8.06153	7.70009	7.90578	7.82905	7.84538	7.0434	7.73705	8.90997	7.98502	7.90343	8.06811	8.30819	8.42216	8.12654	7.88832	7.48323	7.88719	9.25856	8.05102	8.16258	7.809	7.64085	8.03731	7.9351	7.74281	8.10619	8.60328	7.60187	8.58684	7.60691	7.59558	7.92431	7.5905	8.40467	8.62659	8.34146	8.48811	9.23344
PJA1	9.71541	8.98989	9.95186	10.0753	9.16341	9.14043	9.07469	9.24641	8.75084	9.19906	9.98028	8.21686	8.66854	9.71193	8.96833	9.68484	9.28713	8.29036	9.54741	8.10553	8.60389	9.2264	8.62941	8.72834	8.01575	9.29313	9.49501	10.1992	8.50624	7.80407	8.86983	8.42454	9.3638	8.24964	8.33991	7.83688	8.87559	8.28481	8.62465	7.83799	8.0145	8.15616	10.0244	9.28042	9.47414	10.7436	10.5223	9.92171	10.6559
RAP2C	9.97454	8.34341	7.71066	8.35875	10.3314	8.95526	9.36932	8.31401	9.26115	8.45666	9.2584	7.86725	8.45744	9.12074	9.414	8.2795	8.8721	8.48147	8.44385	8.70456	8.36121	8.26186	8.5218	7.63916	8.44106	10.2034	8.90712	8.71899	8.53417	8.99768	9.42614	8.91568	7.33129	8.34803	7.66149	7.91721	9.15294	8.25815	8.85084	8.6527	8.21168	7.15372	9.51972	9.46519	8.78438	9.63836	9.46452	9.87967	9.33785
PUS1	8.04124	7.13955	7.76254	7.6071	6.90947	7.81779	6.96194	7.12453	7.92259	7.62134	7.21208	7.06312	7.5867	6.47431	6.18721	7.80255	6.46592	6.93795	8.19966	7.45271	7.26931	7.40532	7.74691	7.14221	7.64923	7.34299	7.61417	7.12453	6.90516	7.41056	7.21808	7.3877	7.07456	6.61031	7.83533	6.55509	6.82182	6.9072	6.73391	7.63507	6.52892	6.59234	8.99553	7.63412	8.77301	6.97105	7.21191	9.88856	8.65121
TRAPPC13	6.42433	5.49383	5.42834	6.22109	6.765	7.09501	6.01663	5.21358	5.06844	7.00649	6.35678	6.64934	7.06681	7.3436	6.92898	6.84137	6.0876	5.16837	7.41215	6.43253	5.65104	5.43554	5.80331	7.26572	5.76117	6.1749	6.76581	5.34957	5.34205	6.09127	6.60976	6.6675	5.52197	4.9234	5.77818	6.04839	5.98506	5.83422	6.20621	5.12966	6.10095	4.3088	7.56711	5.11879	7.23701	6.41367	6.60264	7.5099	8.10634
SLC22A17	5.70211	6.58365	6.26244	6.281	5.58094	5.87689	6.05014	5.78904	5.69395	5.78177	5.94578	5.86396	6.12777	5.73584	6.13438	6.08894	6.1796	5.81686	6.35568	5.63986	5.80177	6.25001	5.94602	6.01001	5.44991	5.8802	6.28383	6.50211	5.68176	5.72531	5.85404	6.15932	6.14346	6.78013	6.54142	6.21522	5.59731	6.13869	6.17182	6.04267	5.46049	5.91879	6.09453	6.50931	6.08932	6.58809	6.71948	5.90872	6.54144
PCTP	8.04156	8.22606	7.52381	8.42415	7.26145	7.39658	6.81321	9.13852	8.12273	7.1232	7.59042	8.01216	7.23496	10.2958	8.31365	7.56347	9.00023	7.41983	8.1015	6.6607	8.39815	7.68773	6.67839	7.0633	7.01869	8.81503	6.9163	7.70924	7.31865	8.12787	7.90961	6.82496	7.5734	6.83243	6.28731	6.96789	7.48537	6.87871	7.12098	6.01301	6.77579	6.36417	7.92165	8.68516	7.98503	8.5968	9.37213	8.11407	8.52793
S100A14	7.70811	8.55695	8.61668	9.05089	9.32991	8.71265	9.23241	7.49166	8.81535	6.63719	6.70053	7.86755	8.11585	9.01401	9.44936	7.74809	8.57814	6.85388	8.77984	7.49624	8.14573	7.1144	6.67095	8.00976	7.30364	8.19307	7.38566	9.50653	10.604	9.33498	7.43612	8.02986	7.73698	8.12891	7.35395	7.1929	9.13133	7.08966	6.91281	7.42871	7.16868	7.33879	10.7975	8.18807	7.79807	10.1357	8.56606	9.18263	7.22766
NES	7.65197	6.64407	7.26934	7.16149	7.34023	7.44718	6.96639	7.11915	7.19125	7.0735	7.38435	7.3741	7.72714	6.86502	7.39484	7.35882	6.95585	7.378	7.11389	7.19911	7.296	7.6778	7.50052	7.23153	7.13078	6.95052	8.18565	7.57324	7.13926	7.4119	7.01249	6.39616	7.27069	7.46248	7.396	7.43576	7.41076	7.71126	7.43703	6.99119	7.63607	7.57722	7.14681	8.42774	7.15966	8.14143	8.36627	6.2946	7.95241
VPS28	9.55034	9.63768	9.19656	11.5186	8.20081	9.79765	9.09204	9.75676	8.51945	7.82082	8.77197	9.6494	9.11762	10.5211	8.39648	9.5633	8.78873	8.99171	9.28933	8.99822	8.99699	8.7698	9.45506	9.98607	8.73434	9.75616	8.5783	10.2908	9.82017	8.38265	8.50306	11.8861	8.84019	7.924	7.48645	9.14144	9.10262	9.09064	9.20896	8.71251	8.73608	8.53445	10.417	10.9422	11.5305	12.3689	10.1242	9.35997	12.4247
SDF2L1	8.52148	8.19539	7.95542	8.11872	7.37569	7.71905	7.43888	7.65989	8.40773	8.01476	7.32227	7.09979	7.51166	8.33826	8.73588	7.44373	7.98906	7.48543	8.14756	7.29455	7.6617	8.55186	7.58934	7.66128	7.70702	7.30988	7.53652	9.33792	7.94993	7.42114	7.71897	8.21176	8.16678	7.53968	6.76326	7.82173	8.37824	7.94742	7.54454	7.43625	7.45862	7.57603	8.58898	9.25954	8.47139	8.85056	8.27548	9.02725	9.60635
PTBP2	9.63656	8.79024	8.27551	8.41727	8.00027	9.49164	9.18255	9.78968	9.12402	10.6199	10.5134	8.47789	8.23012	10.0993	8.85246	11.7162	9.83861	8.55219	9.8594	9.74952	8.20628	8.85126	8.9863	9.11012	8.59331	8.41202	11.2517	9.5083	10.2156	7.83055	8.84503	9.36131	9.61057	8.14699	10.0324	7.98934	9.86653	8.86576	9.29344	10.6129	8.24448	9.39675	9.26413	9.13616	10.3522	8.78294	10.7975	10.0667	9.28198
LRRC8D	10.8289	10.5375	9.9257	10.9828	10.795	10.9889	10.7556	10.9583	11.0638	11.3412	9.9419	10.6949	9.15269	11.2795	10.4458	11.1585	10.9837	10.3368	11.0635	10.954	9.66382	9.9833	10.2602	9.70163	10.9053	10.4851	11.0724	11.469	11.0683	10.6452	10.0936	11.1163	10.8709	9.60083	10.4495	9.04723	10.6249	9.63519	10.0794	10.8242	9.45133	10.2192	10.5425	10.7017	11.7252	10.0466	11.5292	11.5422	11.3458
SMUG1	8.13337	7.4194	7.52133	7.33165	7.4287	8.08629	7.22114	7.53618	7.84915	7.89504	8.07395	6.94895	7.41932	7.32616	7.28824	8.702	7.78322	6.81172	8.25262	7.46536	7.0439	7.08952	7.74068	7.39575	7.39855	7.74633	8.56799	7.1056	6.68766	7.79704	7.27712	7.11423	8.05497	7.45738	7.83516	7.40173	6.81759	7.62968	7.96077	6.95636	6.78282	7.37102	7.97438	8.87599	7.88764	7.56631	8.5821	9.1881	7.70341
RHBDF1	8.47462	8.27585	8.11793	7.71182	8.22957	7.51517	8.29225	7.93906	7.86939	8.08401	7.86938	8.81191	8.22782	8.05947	8.44963	7.61162	7.92571	8.57921	8.97086	8.06352	8.15628	7.63963	7.72761	8.40091	7.56678	8.596	7.46891	7.37227	8.63343	8.08949	7.74215	8.12112	7.68364	7.69012	7.36726	7.67166	8.45821	7.46086	7.49781	9.23502	7.40787	8.15433	8.70972	8.45251	6.70346	8.78138	8.96115	7.58324	7.21238
FANCF	8.85686	6.95789	7.51266	9.06155	6.76771	7.83161	6.88413	8.17568	7.65137	9.09762	8.40342	8.19692	8.08021	7.96624	7.46012	8.34812	7.17181	7.19275	8.65005	7.97213	7.87122	7.64229	7.34887	7.84438	6.56411	8.04374	7.74264	7.85273	8.01808	7.30157	8.17099	7.79775	7.64612	6.91309	8.05197	6.80426	8.15408	7.11749	7.9205	7.56027	7.44487	7.29374	8.95134	8.79731	8.21076	8.78441	9.43239	8.9215	9.46878
PDLIM4	7.49666	7.93794	7.81632	7.48591	7.79814	7.84551	7.91046	7.93347	7.89519	7.78954	7.59512	7.89942	7.92804	8.04874	7.85714	7.5515	7.83068	7.74093	7.84121	7.6641	7.75447	7.75093	7.84679	7.77462	7.69437	7.71203	8.0323	7.85693	7.78034	7.59283	7.90266	7.68472	7.90674	8.02829	7.90762	7.78921	7.91378	7.88145	8.05748	8.27636	8.16808	8.02579	7.83595	7.76631	7.47271	7.90254	7.87881	7.71062	7.70071
SYBU	7.4681	10.083	7.07567	5.98353	7.72988	8.8227	7.51877	5.63131	5.31429	6.54804	7.35399	9.66232	8.83207	7.30979	7.42578	5.68006	8.54449	5.44417	7.76154	6.20806	8.23184	6.84467	5.1568	7.19644	6.25655	7.96711	7.45317	6.63208	10.5413	8.07154	6.32052	9.56248	7.1368	7.31071	6.5596	5.99961	8.38836	7.33539	6.98513	8.22712	5.36691	5.89874	10.2784	8.54006	10.4046	8.5561	7.62732	8.97775	8.57997
TSPAN15	7.17466	7.64215	7.79859	6.44218	7.4252	8.09427	8.52303	7.27111	7.53773	7.54165	7.4684	9.00426	8.68423	8.10458	8.36617	7.12217	7.11107	7.84218	7.27396	7.68211	7.65556	6.92734	7.56196	6.68416	6.88031	7.90271	7.45827	8.83481	8.06694	8.18261	7.27429	7.78789	8.22758	7.48528	7.62653	6.7632	6.92134	7.63028	7.44464	7.69276	7.54165	7.57817	8.80107	8.19555	7.88827	7.40699	7.97452	8.54922	6.85684
ARMCX1	7.50513	7.33981	8.03103	8.5047	7.4503	9.2315	8.19819	6.53021	6.88586	8.5097	8.92471	8.01465	7.83597	6.7718	8.98351	9.79295	9.02154	7.4026	9.13754	8.80736	7.68911	7.59758	8.25225	9.06774	8.02817	7.0472	8.73377	8.84295	7.43171	6.07982	6.76294	10.1839	8.68206	8.90368	8.30515	7.79814	8.03431	8.82704	9.0145	7.44339	8.64535	7.69261	9.85623	9.32553	10.0924	9.50845	10.0781	9.6594	9.3066
EIF2AK3	8.12626	8.29233	7.69573	7.85665	7.63984	7.63635	7.52989	8.02627	8.19179	8.77178	8.46703	8.12415	7.88231	8.31545	8.07106	9.21228	7.78421	6.61792	8.35871	8.05568	7.65961	7.64399	7.27784	8.44078	8.09077	8.22842	7.82175	8.78401	8.36061	7.6897	7.53869	7.28137	7.92823	7.71107	7.01285	6.83093	7.08767	7.65402	7.49358	8.3181	7.75654	8.17253	9.33681	9.03917	9.20193	8.78157	9.91805	9.38412	9.98442
NCKIPSD	7.54985	7.46592	7.64822	7.95646	7.11411	7.44242	7.90697	7.69903	7.11932	7.33444	7.62529	7.62205	7.58939	7.37667	7.24603	7.24023	7.69068	7.45981	7.0127	7.48782	7.45875	7.17151	7.6197	7.81091	7.86202	8.13611	7.36904	7.48708	7.84534	7.51645	7.46147	7.74367	7.20901	7.44205	7.83271	7.4254	7.4604	7.29283	7.54985	7.59057	7.29108	7.24282	8.56571	8.88681	7.63844	8.01679	8.14505	7.77208	8.72023
APIP	8.43148	8.88174	8.57662	8.81004	8.71821	8.09025	8.43793	8.82636	9.06077	10.3274	9.06925	8.29005	8.17911	8.97781	8.89561	8.93298	8.64206	8.0597	9.60914	8.12559	8.41114	8.00032	8.92395	7.7614	8.51681	8.83067	8.79554	9.02576	9.39314	8.76811	9.26042	7.64596	8.54548	7.61372	8.72813	8.16278	8.99295	8.53402	9.12474	7.08496	8.17702	8.07215	9.38575	8.2007	9.69726	9.60386	9.65416	10.0638	9.87576
RAB29	8.70757	10.6664	9.45779	9.2516	7.87686	9.21053	8.83818	8.01447	8.16481	8.33214	9.2002	8.4846	9.07406	8.25799	8.20167	9.18975	8.1597	7.92864	8.97121	8.87624	8.59397	8.66739	8.28378	8.61144	8.54253	8.4915	8.52313	9.04718	9.97294	6.17287	8.07239	9.14514	8.73903	9.1677	8.61069	8.65023	8.86892	8.69673	7.84069	8.2181	8.76161	8.16592	9.09428	9.1627	9.51954	9.42246	9.68119	9.38323	8.99793
LACTB2	7.97125	8.65646	6.57176	6.17126	8.87708	8.27619	11.0193	9.9974	7.77146	8.16884	9.59677	8.87509	8.37972	7.98326	8.45464	8.83769	8.82904	7.51771	8.20502	8.63349	9.01132	8.14426	8.01761	8.4339	8.69067	8.38805	8.74758	8.0441	7.27422	8.50876	7.26947	8.18584	7.26578	7.2045	9.57357	7.8761	8.27859	7.37001	8.14935	7.81598	7.07997	7.37472	8.83347	7.99344	9.78374	8.2203	7.84043	9.2261	8.17578
SARS2	7.28073	8.06371	7.41862	8.09157	7.79837	7.568	7.34522	8.01163	7.40609	8.03425	7.82115	8.24721	7.29143	7.80617	7.30099	8.01486	7.82576	7.46344	7.85388	7.56858	7.51781	7.40949	7.63721	7.47962	7.57127	7.34491	8.4553	8.08222	7.38896	7.62793	7.06884	6.9769	8.28672	7.25483	7.92258	7.96142	7.22125	7.32625	8.16423	7.85569	7.66937	9.01836	8.12469	8.63008	8.5818	7.62993	8.91289	7.97528	7.47698
SEC22A	6.50756	7.33494	6.97286	6.62747	5.59207	7.04212	6.99606	7.5716	6.903	6.54568	6.59004	6.4847	6.8702	6.65621	6.32089	6.77256	6.89843	6.19347	8.15853	6.93708	6.97927	6.2555	6.933	7.258	7.15853	7.23235	6.82908	8.02956	7.21793	6.55957	6.51652	6.71937	6.80873	6.23437	6.43953	6.1158	7.13609	6.93289	5.63764	6.80565	6.01049	6.17475	7.68213	7.46675	8.11212	7.1758	7.34038	8.01514	8.23861
RNF43	7.70253	6.83509	6.50112	7.55201	6.57362	7.11607	6.84716	7.39246	6.78548	8.681	7.21109	6.70012	7.09957	7.42808	6.97102	7.54773	7.45719	6.21003	7.69426	7.10357	7.24213	6.98118	6.90176	7.38206	7.44453	7.49234	7.30898	7.30898	6.52713	7.11866	8.64832	6.66008	7.12269	7.06775	7.43607	6.85778	6.74245	6.80129	7.30901	6.63039	7.67411	7.74919	8.47782	7.51185	7.62308	7.54127	8.29883	7.85567	8.01874
SNX24	6.86002	7.10167	5.78312	6.32273	5.3248	6.80242	8.67224	7.65452	6.64804	8.63392	7.0198	7.30034	7.12049	7.11713	8.53484	6.59134	7.86673	6.74168	7.01622	6.42823	6.72284	6.22774	5.48694	6.13461	6.11911	7.12598	6.86748	7.22203	6.36806	6.49062	6.00286	8.54359	6.96955	6.30289	5.6589	6.42688	6.82215	6.67801	7.08929	5.11726	6.7167	6.82065	7.49587	8.84141	8.03099	8.42751	6.68463	8.20505	7.04984
GRAMD2B	7.62799	7.98541	7.59358	7.53618	7.60831	6.81929	9.35317	7.84301	7.77171	7.83365	6.74996	7.89714	7.6334	8.87794	7.88824	6.18769	6.99403	7.30516	9.2224	7.16125	7.65228	5.69399	6.53475	6.99461	8.2237	8.28051	6.14755	8.67913	7.09833	8.39807	7.85822	8.39955	7.53116	4.96547	6.9903	6.55763	6.40508	7.83645	7.1934	6.05611	6.22942	7.14703	8.39288	8.66658	8.63905	9.66626	8.34243	7.8182	7.90185
NXT1	9.0565	8.41792	8.42858	9.31171	8.73817	8.80115	8.78259	9.0132	8.85987	9.3513	8.99634	9.00082	8.56666	9.01159	8.58373	9.15777	8.69632	8.32907	8.92354	9.05501	9.16261	9.31038	8.65068	8.86968	8.40052	8.15489	9.86386	9.16391	8.58866	8.87206	8.32776	9.55976	8.82121	8.56535	9.03781	7.9126	8.92581	8.62817	8.46171	8.44495	8.55171	8.25321	9.83173	9.90368	10.2208	10.1089	10.3146	10.2517	10.5294
IFT52	7.82816	8.39166	8.79262	8.01883	8.81971	8.09178	8.05968	9.05355	8.16037	8.33642	9.06594	8.31149	8.49295	8.4012	8.07009	8.89389	8.4763	8.44692	8.64811	8.57838	8.08464	8.32629	8.93478	8.14425	8.18242	7.83914	9.00148	7.89508	7.79462	8.58908	8.83115	7.60648	8.396	8.62291	8.43259	8.99304	8.37955	7.73683	8.24007	7.7528	8.57555	8.15898	8.75717	8.89185	9.5069	9.02935	10.3589	9.36387	9.17201
TTC27	9.26905	8.35091	7.78201	8.11174	7.22033	7.36281	7.73859	7.93032	8.34039	8.45292	8.54245	8.16984	8.30718	7.89011	7.58807	9.0916	7.85117	7.02881	8.32968	7.90704	7.22406	6.9601	7.47451	7.73412	7.13987	8.33924	8.59712	8.33267	7.9898	8.31648	7.7764	7.60714	8.09102	8.04318	7.61536	6.74042	7.89724	7.52194	7.21348	7.1479	6.76049	7.59923	9.19481	8.60873	9.02643	8.60858	8.17393	9.77388	9.17879
C1orf109	7.68396	7.64059	7.0411	7.81746	7.34332	7.33108	7.33742	7.71522	7.20933	8.15003	6.95181	7.18568	6.97792	8.33814	6.88455	7.65468	7.74412	6.53381	8.55645	7.51218	6.56463	6.55133	6.49945	6.79243	8.50203	7.76186	7.57801	8.01774	7.52887	6.59419	7.28267	6.65402	7.16701	6.06751	7.32847	5.88599	6.516	6.57204	7.59416	6.67525	5.55977	6.57271	8.38226	8.61323	8.6693	8.14317	7.24678	9.12702	8.41335
ICE2	8.62991	7.1391	6.85048	7.51322	7.02068	8.11008	7.82551	6.62083	7.69916	7.60158	7.22523	6.98514	7.8777	8.34292	7.28335	7.60158	7.05568	6.3485	8.62716	6.99185	7.26009	6.98139	7.03659	7.56948	7.03082	6.87088	7.1859	7.6405	8.91128	7.75942	7.62855	8.04012	7.47701	6.07787	6.93237	6.99791	6.89811	6.90114	7.29221	6.30459	6.19772	6.49591	8.32084	7.56347	8.41889	9.60203	8.01043	8.69156	7.37654
UTP6	8.49461	8.51721	7.89103	8.01158	7.63098	8.27212	8.09552	8.20043	8.39987	8.81561	8.13384	7.93636	8.00084	8.27592	8.17265	9.0259	7.9467	7.41051	8.78316	8.09165	7.88741	7.95851	7.52401	7.27455	8.37174	7.44451	8.21521	8.31353	8.57294	7.52013	8.29083	8.15841	8.12262	8.26756	7.93507	7.48597	7.94519	7.79037	7.69381	7.29878	7.86529	7.75911	8.44516	8.50754	9.52567	8.97906	8.56208	8.67491	9.06932
PDGFC	9.63205	10.2848	9.73821	11.0025	8.25766	9.9411	9.88027	10.419	8.34609	10.7646	10.0111	9.87023	10.3421	10.3263	9.3735	11.0266	10.5851	9.35845	9.66939	8.78999	9.09336	9.66004	9.89909	9.75093	8.84414	10.2989	10.7766	9.27329	8.84237	8.51464	9.30969	11.9619	10.5219	8.79108	9.51422	9.10083	9.59165	10.5857	9.26858	7.95727	9.65844	9.00986	10.7628	10.615	11.3929	13.2152	11.7688	9.96783	11.4394
GINS3	7.04097	7.396	7.3756	7.25575	7.93681	7.33456	7.27453	7.64644	7.77001	7.20597	7.61437	7.49974	6.77311	7.54581	7.35257	7.6479	8.02143	7.3956	7.0693	7.22154	7.28886	7.57039	7.57063	7.33069	7.63209	7.00901	7.27492	6.90283	6.37082	7.31536	7.20407	6.93514	7.64376	7.6348	7.6235	7.21203	7.35364	7.3165	7.71351	7.53526	7.68683	7.27492	6.9573	7.28648	6.93495	6.58178	7.84495	7.27492	8.21651
ODR4	7.28323	7.88207	7.1001	7.26195	7.76729	7.44957	7.35825	7.54815	6.88697	7.61532	7.63948	7.79076	7.13555	8.19063	6.54356	7.73803	7.45904	6.60838	8.33199	7.69079	6.13938	6.9164	6.77784	7.3603	7.42516	7.6151	8.00406	7.44514	7.39347	7.41469	6.21814	7.3339	7.49686	6.79273	6.90602	6.50824	7.055	7.18142	7.18745	7.08496	6.99406	7.23424	7.36028	8.24973	8.75337	7.86963	8.41216	8.45718	8.68964
CCDC51	9.04274	8.98677	8.45849	10.3155	8.64973	9.4054	9.24457	8.78081	7.79912	9.01879	9.85394	8.7207	9.22753	8.88	8.60233	9.44294	9.27797	8.27633	8.34602	8.32789	8.48522	8.4162	8.96332	9.35808	8.99174	8.97991	8.71229	8.55825	9.74656	8.90981	7.66463	8.71772	9.02318	9.45938	8.41189	8.38918	8.53906	7.93527	8.00481	8.25906	7.96089	7.76966	11.5187	9.1625	9.79903	11.5564	9.83177	10.1541	10.438
RGCC	6.94951	9.84166	7.75702	8.77606	6.9748	8.55828	7.35335	5.97146	6.51915	8.03951	6.2951	8.05304	8.20313	6.32371	8.16711	4.47517	6.74653	6.94652	6.94109	6.76148	7.46292	6.98812	6.91846	7.38074	6.73742	6.9737	5.37102	5.42357	8.632	6.05941	5.88676	7.41793	5.83374	7.26813	5.64373	8.38237	7.33582	7.44244	4.85959	7.67924	6.82452	6.61879	7.92237	7.53833	7.7188	9.00624	7.82108	7.98125	11.0046
SLC25A22	7.23191	7.1149	6.11949	6.74641	6.65846	6.28867	6.55453	6.79206	6.8402	6.90767	6.62461	6.64008	6.97333	7.06693	7.17772	6.84489	6.40018	6.57837	7.11477	6.6302	6.55477	6.4764	6.3459	6.72225	6.65999	6.90767	6.85854	6.81449	6.91332	6.40708	6.71169	7.09342	6.97946	7.03452	6.92485	6.34751	6.90767	6.36	6.81245	6.56208	6.14196	6.78967	8.0975	7.49659	7.56016	7.43309	7.28687	7.58912	7.30744
HJURP	7.2497	6.99464	7.33899	6.58202	7.55861	7.29865	6.69122	7.63884	7.89047	7.65527	7.36899	6.67327	6.35213	7.86438	6.66588	7.4223	7.2941	7.23765	6.83836	7.68656	6.44131	6.67429	7.09836	6.01085	7.53382	7.38253	7.22417	6.677	6.71218	7.08888	6.41406	6.81486	7.10511	6.59558	7.18874	6.57745	6.91177	7.18834	7.68637	6.93278	7.76272	7.06309	6.81322	7.83041	8.33855	7.18785	8.06076	7.51571	8.17612
LXN	6.09947	8.84286	7.55192	5.04129	6.53216	7.66047	7.44686	7.23111	6.71727	6.50971	6.67147	6.11053	7.42502	6.33404	6.39705	7.09695	6.56186	6.70565	7.11831	6.71791	7.76595	6.95874	7.17867	6.34375	7.87212	6.91195	5.42299	8.20733	6.97033	6.30229	7.31532	7.00589	7.75699	7.81256	7.02493	7.17284	6.92848	8.40184	6.17292	6.15714	6.64167	6.06384	7.55061	8.12875	8.78149	8.9408	5.20226	8.15606	9.64319
PTRH2	9.84736	9.00701	8.3438	10.3632	8.40111	9.43985	8.4957	8.99547	8.58706	9.66977	8.58541	8.93772	8.64251	9.57976	8.98792	9.16449	8.89583	8.34408	9.03432	8.83459	8.8255	8.64777	8.65181	8.70123	8.75366	9.4247	9.54736	9.49814	8.66934	8.66173	8.76271	8.6075	10.082	8.9397	8.53445	8.69063	8.713	8.41262	8.78608	8.58015	7.99953	8.6497	9.14109	9.3638	10.5286	10.1719	10.0979	9.4694	10.7953
MSL2	5.87655	5.62837	5.45278	5.64915	5.32476	5.92975	6.25678	5.96161	5.77147	6.81759	5.74445	6.13751	6.45292	6.02447	5.7284	7.35178	6.22163	5.15825	6.77199	6.11785	5.60121	5.57154	5.33878	5.64726	5.84559	6.26666	5.79264	6.10892	6.00782	5.7778	5.75399	5.26775	5.54395	5.91826	5.51136	5.44072	5.98388	5.54767	5.6957	5.6218	5.86695	6.01199	7.15726	6.1856	6.2253	5.62267	6.4075	6.46358	6.17316
ZNF544	8.49513	8.24994	7.81426	7.81645	7.28109	6.86269	8.85137	7.47043	7.50734	8.57074	7.93224	7.94642	8.05269	8.10402	8.12689	8.46363	8.30254	7.82703	8.09805	7.75352	7.46468	8.14688	7.58416	7.86891	7.93938	8.15804	8.05542	9.49528	8.57031	8.06472	7.73256	8.19569	7.0926	7.47314	8.50082	7.41131	7.82839	7.33003	7.60274	8.57115	7.69812	6.96565	8.45712	7.93974	9.44028	9.32515	8.19495	8.40976	8.99497
PALMD	9.25789	7.63365	7.09989	9.11766	7.40712	8.37077	7.35407	4.65014	6.93575	5.33528	8.09808	7.77972	7.00307	5.2468	7.52098	6.49961	7.53654	4.28631	8.11806	8.77794	7.63365	7.57628	8.19408	8.53711	5.92304	5.6135	6.6135	5.29152	7.91913	3.79676	6.37466	8.36612	6.7141	5.50587	7.73079	6.54579	7.95749	7.44846	5.50029	7.83265	6.28292	5.05314	9.70695	8.55058	7.55071	7.73778	6.74801	8.10363	7.76601
RNF138	9.99905	8.97666	8.27723	8.78226	8.99529	8.55935	8.94565	8.58232	8.22975	11.4502	9.36027	8.74615	8.75893	10.1636	8.80125	9.91686	8.63874	8.02238	9.41155	8.85173	8.3025	8.85936	7.75962	7.25181	8.97818	8.86376	10.1384	10.1064	9.20353	9.05503	8.83188	8.3865	8.31341	8.54523	8.6789	7.36425	8.71461	7.93751	8.61047	8.01887	7.87888	8.43366	9.6777	9.43239	10.4784	11.1588	9.85361	10.5308	9.58888
CDK5RAP3	9.27662	9.06902	8.09577	9.96361	9.41126	8.85353	9.07431	9.07656	8.43702	9.09886	8.77675	8.94592	9.08915	9.84663	8.4195	9.67908	8.93485	8.00276	9.38485	8.44482	8.85325	8.2544	8.55872	9.00435	8.45269	9.61806	8.77626	9.9392	9.54439	8.50821	9.38619	8.57403	9.22451	8.63778	8.39851	7.53176	9.12068	8.53932	9.58827	9.77561	8.00197	8.62224	8.83451	9.73497	10.479	9.5499	9.75603	10.0305	9.28439
CENPM	6.96969	7.20558	6.29554	6.29418	6.53073	6.67286	6.13159	7.64989	6.61579	6.54271	5.89848	5.92529	6.75362	7.29819	6.27858	6.62939	6.54144	7.07055	6.03438	6.61423	6.13253	6.30441	6.64661	5.84886	6.84744	6.61967	7.65155	6.46656	6.64142	6.91982	6.39753	5.73022	7.24308	5.73029	6.19965	7.43766	6.31307	6.45922	7.66281	6.20022	6.09727	6.44712	6.64606	7.78182	7.65713	7.35814	7.90459	6.59296	7.56348
NARFL	6.8815	7.1188	7.05557	7.27698	6.91413	6.41272	6.41842	7.18266	6.79097	6.58733	6.44941	7.07463	6.73158	6.49776	6.54985	6.64022	7.00715	6.77281	7.1741	6.45686	6.74622	6.38992	6.73701	6.92925	6.58896	6.81703	6.79949	6.50263	6.99171	6.78259	6.55276	6.99258	7.10509	6.8799	6.68669	6.46494	6.73807	6.89976	7.29816	7.44484	6.63613	6.88157	7.84402	7.4718	7.09322	7.13334	7.00287	7.64484	7.48906
CHMP6	7.01793	6.93202	6.88862	6.5978	6.86631	7.17146	6.37993	7.27691	6.88044	6.16378	6.82168	6.53264	6.62099	7.18069	6.74057	6.90577	7.03851	6.58995	6.95036	6.46931	7.32045	6.59732	6.52062	6.78205	6.69215	6.87727	6.99983	6.82936	6.12365	6.59679	7.00923	6.97832	7.10087	7.49682	6.78939	6.9882	6.5291	6.90124	6.62866	6.74756	6.56471	6.81311	6.73062	7.38068	7.03998	7.58975	7.26155	7.12951	6.87643
PACSIN3	6.15654	6.05719	5.60686	5.7421	5.23445	6.15007	5.81151	5.66969	4.98737	5.92628	5.46792	6.17988	5.49723	6.21334	5.8369	5.9957	5.82927	5.78711	6.71068	5.78539	5.44895	5.63884	6.2893	5.47613	5.96113	5.96603	5.5938	6.75727	6.91626	6.2808	5.81724	6.11889	5.85026	4.67275	5.88069	5.98616	5.97791	4.67367	6.08032	6.27272	5.20054	5.78323	5.77003	6.90798	6.17027	7.12903	7.07731	7.23908	5.55687
TAPBPL	7.93761	7.27585	7.72499	6.25045	5.88297	6.89036	7.22068	6.455	6.9714	6.19352	7.13413	6.08065	6.70051	7.68497	6.70749	6.18142	6.19661	6.86616	6.78608	6.69783	7.18446	6.97192	6.48195	6.80479	8.07514	7.10806	6.08237	6.92757	7.53412	8.32053	7.55751	6.44467	6.77217	6.77454	6.39636	6.50166	6.2047	6.22469	6.91859	6.53644	6.28683	6.57723	8.03839	8.33755	7.76568	8.20406	6.17981	7.50179	6.83913
SLC8B1	6.96179	6.67328	6.99622	6.48161	6.84833	6.70897	6.56914	6.51211	6.35796	6.2714	6.54453	6.4028	6.69502	6.67328	6.56261	6.67328	6.45179	6.7222	6.44499	6.62241	7.05898	6.75369	6.76472	6.3723	6.4934	6.48459	6.37088	6.86247	6.45704	6.74735	6.56828	6.5621	6.70823	6.71279	6.8752	6.60242	6.41798	6.85001	6.6054	6.86292	6.36832	6.64086	7.26771	7.20298	6.67493	6.67328	6.38285	7.37344	7.02834
TAF1D	9.04238	8.1168	7.80968	7.94025	9.75057	7.08065	7.76687	8.67449	8.99079	9.94367	8.00453	9.30184	8.49754	8.08076	8.62649	8.90831	7.14983	8.37984	8.72277	9.13772	7.12372	7.50282	8.28325	8.94567	8.16662	9.52289	9.11937	9.57249	10.1008	9.30845	8.2874	10.0889	9.74612	7.38811	9.10666	8.00307	8.23637	9.31246	8.53544	9.89622	8.06876	8.34921	8.48427	8.70809	9.38069	8.55983	8.08786	9.35151	9.05301
ZMAT5	5.66262	6.09089	6.89482	6.59534	5.57331	6.30789	5.61787	5.72045	6.19249	5.75352	5.96288	5.51113	5.993	6.10689	5.7398	5.89717	5.40766	6.11199	5.38198	5.99109	5.77044	6.22281	6.01558	5.9724	6.05022	6.03384	5.81087	6.12195	6.1095	6.4068	5.81233	6.02789	5.9087	6.10951	5.99686	6.40752	5.86662	5.66248	6.24064	6.13143	6.06471	5.80329	6.5811	6.64089	7.19139	6.2333	6.41323	5.9952	7.14261
XKR8	7.82722	7.88686	7.74029	8.19266	7.90894	7.53113	8.02479	7.97317	7.75059	7.88841	7.9105	7.78415	7.9056	7.98592	7.96737	7.88472	7.39825	8.06581	7.73201	8.04425	7.64757	7.72748	7.81332	7.70882	7.79235	8.30293	8.1901	8.17659	8.18252	8.06633	7.78756	8.05676	7.94906	7.53325	7.93678	7.73314	7.90186	7.92011	7.75687	8.11395	7.44164	7.59388	8.22247	8.17451	8.11461	8.47629	8.12954	8.27898	8.16287
NOL9	7.62951	8.28352	8.49151	8.56184	8.41446	8.4683	8.02798	8.37911	8.16977	8.25864	8.58885	8.30945	8.09281	8.08693	8.08033	8.31145	8.05752	8.32166	8.22855	8.19171	8.07223	8.23525	7.84084	7.96472	7.84167	8.28142	8.18561	7.94248	8.08457	8.54972	7.81759	7.97395	8.31088	8.13114	8.49102	7.69167	7.88198	7.98855	8.26884	7.88891	8.43437	7.76453	8.7694	8.10403	8.75251	8.81321	8.67597	8.58179	8.64214
KIF20A	7.67601	8.23987	7.25345	7.63255	8.86419	7.88887	8.723	9.10993	7.80137	8.73187	8.1366	6.80021	6.87625	7.98512	7.92029	8.07827	8.12606	8.26706	7.20174	8.69545	6.97277	7.57029	8.08258	7.3342	9.00451	8.31761	9.06876	8.49504	6.88251	8.48863	8.06647	8.07719	8.02863	6.21008	8.11881	7.09806	7.99633	8.31439	8.14061	7.52788	7.78154	7.84071	8.24005	9.21351	9.3191	8.82859	8.92837	8.50308	9.37974
DHRS11	6.56457	7.37424	6.07218	6.29083	5.72902	6.35319	7.28881	6.65028	7.23158	7.42913	6.0556	6.85373	6.64131	8.22437	7.61792	7.59862	7.73969	6.48435	7.07124	7.04728	7.37925	7.04416	6.03314	6.57411	7.49161	7.06481	7.00328	7.116	7.02895	7.16404	6.73093	5.84459	8.95668	7.66607	5.9432	6.6731	6.90399	5.97669	6.20721	5.9152	5.50974	7.66349	7.73233	7.67837	6.45275	7.676	8.51959	7.47743	7.04594
UPF3B	8.79039	7.77649	8.06648	8.68061	9.0169	8.24343	8.88904	8.40459	8.17497	8.99939	8.89713	7.13806	7.88701	7.84298	7.23021	9.11408	8.9306	7.31688	9.28392	8.95237	7.2316	8.42332	8.21446	8.36119	8.09194	9.06249	10.1112	8.72673	8.61845	7.59716	9.44696	7.11802	8.82662	8.84143	7.98371	6.46148	8.42338	8.22524	9.4172	7.82161	7.95549	7.84753	9.67519	8.48184	9.25316	9.26517	9.04097	9.84932	9.25925
RRP1	8.08524	7.47126	7.28058	7.39547	7.13367	7.63947	6.84301	7.64546	6.93291	7.60319	7.3302	7.64643	7.3803	7.21952	6.88876	7.2878	7.36329	7.4963	7.37736	7.43633	6.94734	6.93753	6.67749	7.27689	7.29156	7.56471	7.43743	7.31035	7.78628	7.37808	6.92592	7.16139	7.40747	7.00769	7.32008	6.59517	7.15779	7.01156	7.11592	8.44175	6.53857	6.80441	8.23476	7.93626	8.38442	7.77555	7.7272	8.18853	8.09794
COQ6	6.17921	6.66516	6.33796	6.30924	6.13815	6.5245	6.27157	6.68992	6.299	5.88319	6.15104	5.95151	6.17413	6.09166	6.22461	6.25672	6.23956	6.23826	6.09968	6.256	5.98157	6.21631	6.66614	6.58459	6.4141	6.18879	6.28959	6.24448	6.41742	6.36857	6.55452	6.17471	6.33225	6.45539	6.45135	7.10681	6.28507	6.55869	6.58923	6.34127	6.42124	6.47332	6.54534	6.43788	6.94216	6.22388	6.46316	7.12832	6.35339
RNF111	8.80149	8.4096	7.04975	7.99378	8.75015	8.32205	8.19971	7.89822	8.32768	7.72695	7.8625	7.79441	8.10093	9.38734	8.02849	8.44223	7.99099	7.3755	9.08224	7.00739	7.88063	7.83625	7.83259	8.05505	7.45888	7.87313	8.10341	7.64214	8.74354	8.8596	8.61891	8.0698	7.71635	7.09678	7.37694	8.31309	7.08874	7.71077	7.57239	6.838	6.72976	6.54462	9.39906	8.49932	8.76564	10.1726	9.54871	9.31904	8.66669
ZNF574	6.57154	6.48857	6.48953	7.4481	6.803	6.47608	6.61747	6.33583	6.77406	6.60301	6.61861	7.00352	6.62671	6.43752	6.50928	6.62839	6.59613	6.78374	6.33576	6.75376	6.88802	6.76487	6.66509	6.71794	7.07785	6.16597	6.41261	6.67206	6.70319	6.83491	6.73948	6.66244	6.74314	6.97646	6.65966	6.05138	6.34995	6.74678	6.88165	7.15542	6.40867	6.72541	7.16492	7.17175	7.33822	6.74363	7.32748	6.66704	7.14715
STX18	9.26384	8.54675	7.7291	11.3685	8.59695	8.55037	9.07253	9.44092	8.4918	9.16486	10.38	8.80478	8.81252	9.8016	8.86148	11.011	9.48449	8.99252	11.5503	9.04441	8.61646	8.13528	8.81242	7.82712	9.1606	8.82653	9.36239	8.58513	8.37021	9.31749	7.83677	9.19339	9.54574	9.32883	9.70873	8.52696	9.23943	7.99304	11.2996	8.12982	8.01972	8.27524	8.96422	9.62083	10.0294	9.13799	11.2927	9.35838	9.7825
PRKCH	7.80654	6.14005	5.75151	6.2406	8.77507	6.47604	7.65266	5.48029	4.97342	5.30069	6.70765	7.2404	7.72946	7.30979	7.16325	5.53052	5.87616	5.41727	7.13157	5.3953	6.67388	5.68823	6.30301	4.71214	5.98266	7.02919	5.54945	6.40355	6.29353	6.20486	6.89997	6.43636	5.54092	5.95889	6.24775	6.07649	6.96518	6.48761	7.42782	6.38503	5.45454	5.68843	6.88704	6.76409	6.55033	7.80813	8.15416	5.86589	6.16241
REXO4	8.05272	7.65017	7.30175	7.88767	7.33048	7.66807	7.79474	7.83477	7.58891	9.0895	7.51513	7.13004	8.13348	7.98352	7.39547	7.95847	7.70876	6.98343	7.73035	8.00375	7.51819	8.1014	7.19983	7.6801	7.48793	7.83477	8.06203	8.07876	8.29894	7.51526	8.07767	7.40743	7.63567	7.31178	7.42546	6.76497	7.81389	7.23618	7.42159	7.03558	7.00456	7.24382	8.07789	8.37934	8.41978	8.02785	8.68722	8.50685	8.20374
NUP107	9.58092	9.10009	8.78618	9.28655	8.96251	9.41155	9.09241	9.31417	9.88619	10.6316	9.84032	8.87856	8.64692	9.17792	9.24426	10.4753	9.11991	8.58723	9.6214	9.10536	8.89451	9.0241	9.08893	8.55224	9.61605	9.79465	10.4849	8.60745	8.2918	9.91929	9.0928	8.43524	9.52071	7.92377	9.63313	7.61306	8.588	8.61074	9.40148	8.6104	10.2414	9.05546	10.5484	10.8649	10.7204	10.0572	10.896	10.968	10.6948
ANKRA2	8.03272	7.32138	7.32322	8.59668	7.34418	8.82789	8.70435	7.86951	7.77285	8.81352	8.16308	8.62337	9.10029	8.88796	8.60275	8.48173	7.37049	7.89794	9.06531	8.56158	7.98673	7.48011	7.31093	9.10825	6.95083	9.67421	8.29067	8.57379	8.45043	8.49453	7.94382	8.51774	7.88515	7.48944	7.66573	7.20366	8.4482	7.99629	7.84923	8.56269	7.39565	7.31947	10.0339	7.89194	9.74381	9.0314	10.0495	9.16127	9.0176
TMEM39B	6.6362	6.97194	7.38786	6.56339	6.68312	6.6134	6.94725	7.03822	6.93909	6.39725	6.74184	6.59238	6.44115	6.59371	6.78645	6.85254	6.7187	7.18423	6.5615	6.79136	6.82746	6.38748	6.99135	7.25032	6.89206	7.30501	7.36109	7.32726	6.40638	6.96022	6.73524	5.85387	6.8851	6.65085	7.14193	6.39254	6.87267	6.588	6.35256	6.6279	6.28312	6.96529	7.14721	7.13804	7.50733	7.62239	7.68224	7.51676	7.56422
PANK4	6.3258	6.55729	6.60271	6.68028	6.34681	6.66427	6.64033	7.2357	6.21245	6.40826	7.08592	5.86003	6.34161	6.73482	6.57542	6.77128	6.35994	6.66739	6.98322	6.62303	6.42003	6.60223	6.32481	7.09896	6.12655	6.71998	7.24555	7.39234	7.26612	7.53465	6.58054	5.80134	7.63788	6.69927	6.95401	6.83984	6.71683	6.51231	6.57062	6.68652	5.56492	6.27682	8.18684	6.88026	7.45988	7.1552	7.0336	7.34346	6.77063
TMEM38B	6.12675	5.64342	6.12574	6.37132	7.17343	5.88758	6.44673	6.98392	5.86888	6.29077	7.28155	4.99196	5.09536	5.93756	5.77013	5.76269	6.77342	4.99601	6.18957	6.84279	6.05971	6.49921	5.42091	5.75521	5.5521	7.28399	7.05356	5.55541	5.80186	6.57601	6.61718	6.12554	5.64926	6.97969	5.82763	6.836	6.51803	5.36347	5.68812	5.80813	5.70137	5.62826	6.52004	8.26943	8.07263	6.66531	7.77579	8.10564	7.96309
MSRB2	9.39694	9.01819	9.02719	9.08779	8.31517	9.04182	8.91658	9.20814	8.47388	6.51229	9.23218	7.87352	8.41434	9.06618	8.61057	8.08258	8.43437	8.29961	8.99057	9.36372	7.88108	8.0494	7.92206	8.3416	8.61067	10.0183	7.52206	8.13518	9.53739	8.84292	7.85963	9.36563	8.54765	8.42575	8.12394	8.31621	9.70489	8.06654	8.81365	8.72819	7.24425	8.10036	10.091	10.2632	8.99571	10.4476	8.63453	9.31943	10.7751
DCPS	6.32026	7.1501	7.78399	7.01555	7.2717	6.61237	6.73794	6.77075	6.87409	5.52445	6.45319	6.46212	6.17999	5.86589	6.60976	6.38585	6.70585	6.34431	7.08547	7.09448	6.80536	6.31993	6.65619	7.1302	5.99483	6.92392	7.07544	6.21495	6.81716	6.98333	5.87498	6.32157	6.28902	6.73533	6.36435	6.32206	6.22546	6.71162	6.31582	6.75743	6.73934	6.0338	7.15097	7.25149	7.75834	8.38949	6.79926	7.44077	8.31585
TMEM62	8.12012	7.28995	7.14047	7.10636	6.7724	7.94163	8.22907	6.99349	7.42347	7.77379	7.26874	7.69227	7.348	7.66558	7.93814	7.24746	6.99168	7.04055	8.35535	6.96119	7.50839	7.07695	7.00591	6.93976	7.82666	7.36471	7.0768	7.64513	8.01737	7.60875	7.76615	7.07231	7.39079	7.49598	7.41313	7.50361	8.04002	7.07313	7.30418	6.99105	7.30156	7.43052	8.02844	7.90804	7.42377	8.30101	8.74453	8.04015	7.39982
REEP4	7.06565	7.07387	7.1507	6.91369	7.38019	6.69311	7.11747	7.79422	7.79142	8.13589	7.03684	6.70155	6.93343	7.22812	6.67357	7.4059	6.81756	6.97985	7.26284	6.83276	6.49713	7.28836	6.55186	6.80281	7.18206	7.21473	7.81512	7.21581	7.32727	6.98579	7.28049	6.83203	6.4993	6.16637	6.46707	6.34057	7.35473	6.70199	6.94485	6.88698	6.57762	7.19816	8.77393	7.56561	7.48431	7.78807	8.51428	7.65908	8.85502
HOOK2	6.07879	7.04963	6.47432	7.35738	6.13227	6.73284	7.48583	8.20304	6.56028	6.94989	7.99986	6.49032	6.98929	8.00389	6.21931	7.41738	6.90056	7.84161	7.29285	7.34623	6.62504	6.46185	7.08967	6.16895	7.54774	6.3803	7.14594	7.42533	6.99651	6.78378	6.46517	6.10534	7.06184	7.05892	6.3154	5.87067	7.65788	7.00423	7.62005	7.46918	5.72261	6.30971	8.05437	7.22355	7.09579	7.39021	6.97324	8.9708	7.94972
SMC6	8.20482	7.98737	7.93515	7.91064	7.97933	7.71665	8.69458	8.12855	8.05194	8.39344	7.45879	8.11754	7.52064	7.92632	7.66136	8.05075	8.17442	7.55939	8.51057	7.78763	7.43727	7.54659	7.31359	7.78321	8.04858	7.71718	8.15989	8.4521	7.99616	8.035	8.16476	8.80306	8.18005	8.12985	7.5314	7.00985	8.04921	7.64449	7.45876	7.61205	7.6123	7.5921	8.22222	8.05706	8.87545	8.27783	7.87316	8.82569	8.08706
NT5DC3	6.80585	6.12602	6.66232	6.55142	6.11897	6.58153	6.95615	6.1813	6.2731	6.25106	6.28908	6.27368	6.84363	6.41194	6.38443	6.67334	6.15674	6.74728	6.76633	6.40455	6.53703	6.408	6.6793	6.43981	6.56426	6.69596	6.49603	6.35775	6.27996	6.89677	6.72517	6.40528	6.87535	6.53703	6.74081	5.88784	6.0281	6.84001	6.82429	6.13362	6.20193	6.76886	6.97715	6.25774	6.19296	6.38009	6.42579	6.97081	6.80121
CWF19L1	6.73263	6.81293	7.11388	6.58975	6.79178	7.0193	6.83561	6.87419	6.99991	6.66008	6.73461	7.19359	7.02064	7.09539	7.07134	7.01031	7.3938	7.17463	6.91214	7.07254	6.93885	6.71805	7.11579	7.26058	7.14844	6.65648	7.06648	6.76028	6.85184	7.04325	7.1241	6.79652	6.76377	7.32569	7.28648	7.18922	7.16771	7.60918	6.9058	6.72672	7.39587	7.08045	6.93369	6.32883	6.41294	5.81771	6.0631	6.21048	6.11476
SMYD3	8.48975	9.04951	9.31247	8.70635	8.62905	9.18626	8.87155	9.16856	8.36176	8.65004	8.2643	8.89493	8.62325	8.12738	9.34862	9.46098	9.36497	7.52162	9.13735	8.95279	7.86038	8.82952	8.95157	8.87461	7.95289	7.80075	9.36899	8.83954	8.14037	7.16681	7.98272	8.98155	9.21287	7.39411	8.24648	7.33243	9.3764	8.99023	8.03859	7.67473	7.96999	7.87997	10.1435	9.33408	9.58978	10.2019	9.25314	9.95194	9.99797
BSPRY	7.3092	7.63742	6.91139	6.87157	6.93384	7.04914	7.5573	6.8726	6.67754	6.24597	6.72238	6.68852	6.92745	7.43074	7.30192	6.80449	6.78497	6.8095	6.88647	7.38213	7.73554	7.33719	6.95463	6.54054	6.59671	7.25549	6.65709	7.29055	7.55386	7.26336	7.06289	7.40579	6.83095	7.1747	7.00462	7.06883	7.75875	6.23593	7.08656	7.11543	6.95641	6.93846	6.43867	6.87945	7.41505	7.23461	5.74407	7.24235	8.232
SCML1	6.68104	4.39047	6.31009	6.10656	6.58669	6.75156	6.903	5.46091	5.64975	6.28898	5.43277	6.08533	6.48425	5.00677	6.83461	5.3061	6.00249	6.85087	7.63364	6.03436	6.66339	5.92064	5.30427	6.27055	5.98024	7.54355	4.5143	5.36499	7.75457	7.16942	7.31264	7.80853	5.71724	5.50045	6.93917	6.35971	7.41155	7.6086	6.74984	5.9098	5.82249	6.92954	6.53044	7.2246	7.61808	8.36663	6.00396	7.98751	7.24308
TXNL4B	6.92555	7.19753	7.54562	7.16232	7.16011	6.77865	7.02199	7.11048	6.45943	7.47473	6.86004	7.05509	7.57538	7.33319	6.79445	7.11992	6.8713	6.96096	7.40819	7.21164	6.86039	7.38599	6.66202	7.29211	7.68767	7.06564	6.92343	7.544	7.48705	6.58869	7.04053	7.07788	6.73402	6.53466	6.93732	6.66629	7.06679	6.9115	7.46071	6.84346	6.46071	6.51616	6.91374	7.92199	7.13373	6.82608	6.24172	6.91824	8.46259
ACP6	9.08641	8.52395	7.64073	9.47322	8.07864	8.52874	8.18878	10.3863	8.37352	8.02711	8.97166	8.76322	9.54817	8.51783	8.27009	8.52666	8.6448	8.30645	8.58651	8.33698	8.50904	7.98631	7.88171	9.40043	8.07841	9.64151	8.85712	9.16566	8.37329	8.72023	8.33603	8.85806	8.63626	8.75952	7.72849	7.84555	8.40773	8.00922	8.91916	8.82163	7.49641	8.00854	10.4338	9.52743	10.2604	8.94728	9.65725	8.76113	10.6745
SIRT7	7.02629	7.10204	6.7914	7.8748	7.49708	6.87438	7.21039	6.87436	6.83173	7.07389	6.63194	6.54814	6.37047	7.87055	6.40355	7.18058	6.51997	6.92894	7.04434	6.81818	7.32823	6.47996	6.16813	6.36595	7.00781	7.44133	7.11811	7.65854	6.93671	7.22721	7.17394	6.28767	6.98927	6.34256	6.68883	6.85694	6.90826	6.66409	6.86381	7.35213	6.3987	6.58256	7.49035	7.84423	7.81453	7.97137	7.89417	8.04999	8.54461
KRI1	6.46451	6.4951	6.70078	8.16595	6.83775	6.38218	6.43457	6.97171	6.97311	7.02927	6.89828	6.70747	6.32567	6.62827	6.31412	6.64383	6.32977	6.30524	6.72854	7.35764	6.66122	6.39773	6.54612	5.80829	6.79453	6.19095	6.87764	6.5062	6.20581	6.53088	6.23375	6.53769	7.05393	6.90375	7.74898	5.95774	6.6378	6.76324	6.84762	6.78728	6.16557	6.72854	7.6529	7.45159	7.54801	7.0251	7.1962	8.11815	7.70068
GPN2	5.68482	6.87677	7.19921	7.05795	6.39834	6.27494	5.98206	7.11356	6.80449	6.01588	6.44806	5.65269	5.79508	6.20917	5.77494	6.29082	5.56059	6.17195	6.04087	6.15525	5.78781	6.29697	6.28903	6.03678	6.43141	7.49602	7.25289	7.06059	6.12066	5.77278	5.85033	5.4997	6.65423	5.70775	6.73279	6.04281	6.08356	6.01999	5.6696	5.87177	5.58599	5.68178	6.84648	7.34599	8.01758	6.93546	7.15595	7.30219	8.41357
UGGT2	6.81158	6.93489	6.78273	7.25215	7.05915	7.12525	7.09927	7.31713	7.05253	6.60757	7.56803	7.0421	7.46944	7.33559	7.2892	7.87464	6.88171	6.97952	6.92347	7.49703	6.42246	6.96882	7.02248	7.17637	6.96628	6.95799	7.96759	7.54411	7.80287	6.77341	6.69452	7.45797	7.26416	7.01413	7.2327	6.68828	7.82803	6.91028	6.56136	7.90865	7.22584	7.22991	7.41137	7.1354	7.64812	7.1688	8.00778	7.5161	7.1866
MCUB	8.88489	9.16132	8.4253	8.41526	7.86334	8.51935	8.53384	7.57768	6.75575	8.60902	7.6315	7.69866	7.43217	8.0099	7.0335	6.32294	6.85918	7.72812	7.52156	8.74431	7.01201	8.75532	7.98373	5.57247	8.2286	9.05873	4.59083	8.60902	7.72264	8.60364	8.09613	6.98258	8.18461	4.96232	6.59908	7.62261	9.15916	8.12438	7.88603	7.70459	7.22464	7.33253	8.44858	9.18467	9.54654	9.78673	8.73798	9.17432	9.76473
CHFR	7.56873	7.48972	7.14117	7.2404	7.75384	8.16697	7.73418	7.25112	8.19781	7.5853	8.2855	7.97973	7.56505	7.90035	7.37647	8.17521	6.84257	7.76762	8.07208	7.58739	7.19764	8.06926	7.56879	6.83955	7.6315	9.00206	8.56135	7.66026	7.24933	7.60676	8.43638	7.87443	7.34698	7.39967	8.18592	7.21429	7.61065	7.78999	7.68828	8.27099	7.33725	7.89108	7.75468	8.45205	8.48976	7.51021	8.45043	9.68086	8.84244
VAV3	6.47282	9.8923	7.5924	9.23122	10.1083	8.69826	7.6398	6.94791	8.71036	6.23148	9.48612	6.94552	6.73735	9.77362	9.60736	7.28685	8.97954	7.16924	8.13458	9.26402	9.79277	6.75684	7.37353	6.34142	11.5108	7.24633	6.15726	10.9059	9.86947	10.9888	9.54154	6.68673	8.51721	9.82467	6.60746	5.94396	8.0029	8.07071	8.25301	10.1404	6.62025	8.72207	6.54893	7.02321	9.15456	9.96316	7.15041	9.50237	6.38786
PANK2	10.0878	9.01891	9.32378	9.53014	9.00003	9.55113	8.87548	9.76234	9.60399	10.975	9.33735	9.45441	9.16795	10.4216	9.45591	10.5208	9.36008	8.99037	9.80322	9.73601	9.00526	9.54885	9.30489	8.48125	9.26925	8.61777	10.3997	10.2172	10.7651	9.95956	8.92441	10.2535	9.56418	9.46107	8.8157	8.3709	9.2946	8.95403	8.93157	8.78783	9.07692	8.89796	10.0046	10.6319	11.2193	10.7587	11.302	10.9189	10.8967
TMEM51	6.63378	6.52247	6.61095	6.22396	6.4203	6.69986	7.4215	6.57468	6.47165	6.52193	6.50543	6.47901	6.2877	6.71257	6.77625	6.44287	6.21674	6.49465	6.34447	6.81283	6.72873	6.46677	6.88191	6.00124	6.67059	7.03163	6.54771	6.67051	6.57595	7.29059	6.51782	7.16097	6.06408	6.52695	6.82512	6.40661	6.66437	6.85234	6.52995	6.55711	6.65658	6.93107	7.09005	7.78189	7.62323	7.70337	7.39772	7.63135	7.47326
LRRC1	7.88979	7.78671	7.76356	8.0243	9.0485	7.72283	8.16627	8.17602	7.5117	9.21339	8.02486	7.52127	7.16928	8.63992	7.89095	8.00482	7.64535	6.79492	8.25312	7.98296	7.29728	7.50446	7.55902	6.03969	7.5389	8.70646	8.18331	7.97831	6.23007	7.01299	7.08372	7.46754	7.39147	7.78811	7.39516	6.97579	7.69786	6.7939	7.24044	7.4097	6.66841	7.19507	8.68274	9.31781	8.0685	8.74417	10.051	8.76256	8.4893
FHL3	7.18139	7.41413	7.573	7.46452	7.44182	7.67772	7.40109	7.58809	7.13484	7.40217	7.36339	7.45587	7.58523	7.47926	7.58835	7.60556	7.47887	7.43683	7.21211	7.48076	7.05337	7.21666	7.64145	7.27914	7.38263	7.2073	7.9416	7.71129	7.65009	7.61407	7.81481	7.92602	7.68642	8.17288	7.61714	7.83353	7.41413	7.60771	7.44783	7.4272	7.41413	7.56099	6.76118	8.56275	7.54052	7.24925	7.1225	7.33972	6.98973
INTS6	8.89415	8.52915	8.34487	7.97231	6.70737	8.16452	8.08282	8.42582	9.46404	8.85977	8.36552	9.02112	8.63964	8.62455	8.5923	8.74924	8.13747	7.78579	9.50791	9.06552	7.73973	9.11467	8.38354	9.35812	8.57804	8.6365	8.51787	8.5184	9.04925	8.61093	7.94457	9.17269	8.56074	7.59028	8.22908	7.08917	9.28375	8.66629	7.85804	9.54709	8.32774	7.97002	10.0266	8.72371	9.50746	8.21817	8.53273	9.53902	10.0434
C14orf132	6.69935	7.01655	7.12303	6.67322	7.59008	7.28732	7.30577	7.29993	6.73456	6.89071	6.76016	8.71069	7.67181	6.59088	8.51557	7.95772	8.35984	8.38179	9.10315	8.06852	7.12732	7.7508	7.22627	7.07041	7.29246	6.88785	8.3004	7.19178	6.77218	6.75505	7.49073	8.73354	8.74557	6.82325	8.99935	6.84664	7.22008	7.97238	6.57842	6.89168	8.1262	7.60418	8.82456	7.52628	7.40935	8.01446	6.74724	8.39496	7.52295
KCTD9	6.7589	6.75097	5.49653	5.37134	6.24932	5.6945	6.84768	5.97092	5.58282	7.31554	6.37729	5.99587	6.75476	6.46093	5.97283	6.80052	5.35263	4.83799	6.17167	6.06792	5.58512	5.49234	5.27691	6.19476	5.39711	6.78129	5.93086	5.78247	9.18298	6.653	7.15511	6.10024	5.13329	4.45775	4.38183	5.52403	6.8659	5.91325	5.31604	5.51982	6.23787	4.93866	7.67231	5.71129	6.37974	6.63894	6.59842	5.69885	7.97333
PNMA8A	9.21866	8.5321	8.51626	11.3527	7.32828	9.39827	8.36027	8.65298	9.26537	11.6556	10.2509	9.57657	9.69156	8.44885	9.59957	10.7857	9.46395	8.19117	10.1182	8.75397	7.71887	9.59946	8.87381	9.83603	7.13807	8.39228	10.3581	10.2937	9.32052	7.17703	5.88789	9.40632	9.74251	7.64297	8.58436	7.78386	8.42567	9.35876	10.5539	7.73118	8.601	8.06542	10.8177	9.28443	10.4878	9.1614	11.8545	9.8103	10.0754
EGFL7	6.39869	6.24896	6.72087	5.99438	6.27489	6.33331	6.54057	6.60637	6.31685	6.15041	6.33682	6.58548	6.74827	6.55573	6.60957	6.3668	6.55573	6.38826	6.54616	6.32637	6.66754	6.58479	7.19577	6.64628	6.89709	6.4895	6.59335	6.31888	6.04805	6.75885	6.55573	6.46249	6.71891	6.9359	6.94426	7.47367	6.57645	6.74539	6.71008	6.86982	6.50563	6.49417	6.6725	7.15827	6.62357	6.69928	7.15461	6.30809	6.4383
SLC35F2	9.40245	8.01718	8.56354	9.61458	9.00863	8.2772	8.41903	7.81214	8.83526	9.59567	8.15629	8.85168	9.16624	9.25409	8.29008	7.99836	7.76011	8.42278	8.62815	8.69007	8.52668	9.13061	8.78149	8.51311	8.07638	8.88889	8.80611	8.489	8.22397	9.02549	8.5465	7.6378	9.24505	8.85963	8.6434	7.97246	8.3718	8.27217	8.17919	8.53881	8.24097	8.13577	8.98382	8.47844	9.27912	9.47156	8.61545	9.65681	9.67319
CEP192	6.74626	7.35061	6.32887	6.48534	6.21231	6.46217	7.59759	6.35591	6.32627	8.15499	7.61952	6.82097	5.97433	7.58213	6.64314	7.65796	6.46124	6.16582	6.74443	6.73559	6.58455	6.53854	6.14768	5.72994	7.49018	5.99633	7.38027	6.97015	7.37957	6.97172	6.03995	7.31204	6.27998	5.55012	6.26458	5.30019	6.52489	5.75734	7.09246	6.14673	5.93236	6.22941	6.54307	6.82641	7.7222	8.68851	8.04271	7.34207	7.21671
RPL26L1	9.26502	9.27589	8.18537	10.27	8.67061	9.07097	9.17915	9.74389	8.78957	9.64116	9.58736	8.60183	9.23346	8.93087	8.82061	9.157	9.3367	8.55424	9.55928	8.73718	8.88628	8.94464	8.71041	9.13104	8.97908	9.49952	10.1509	9.78594	9.34918	8.37512	9.22346	9.90663	9.38043	8.45151	8.79707	8.58554	9.11839	8.64749	8.98745	7.85594	8.68823	8.11267	10.1558	11.2619	10.8725	10.8402	10.6313	10.0622	11.1295
FCGRT	7.78046	8.01809	7.80261	8.31333	7.65691	7.76888	7.29074	7.62885	7.50159	7.88596	8.2346	7.93846	7.90257	8.15675	8.39307	8.75656	8.34493	7.449	7.69259	8.01569	7.67986	7.25905	7.74041	7.50626	7.38085	7.26038	7.81942	8.16754	7.8775	7.58882	7.76769	7.49577	7.93662	8.0501	7.70699	7.92334	7.39714	8.12937	8.01036	7.6766	7.53987	7.72203	8.67733	8.55218	7.63527	8.19354	8.91949	7.87814	7.31625
TMEM132A	6.80446	6.81503	5.71756	5.91143	5.89261	5.97879	6.33834	6.2369	5.25893	6.43181	6.40584	6.4186	5.94351	6.42405	5.99205	6.92703	6.38716	6.47527	6.70354	5.72588	6.33661	6.49258	6.54244	5.99803	6.31166	6.16933	6.65999	6.34135	7.01112	6.65087	5.8583	7.06646	6.52062	6.07409	5.97655	6.15501	5.95889	5.98283	5.7543	6.32411	6.34107	6.79147	6.61354	7.8655	6.34312	7.75989	8.70245	7.81488	7.55915
TTC31	6.97972	6.70395	6.77768	6.29218	6.29046	7.01247	7.36354	7.67353	7.11612	7.12615	6.60141	7.45914	7.15982	7.42297	6.70052	8.15815	7.53286	6.67152	7.28192	7.16413	6.87743	6.31098	6.93247	7.24878	7.2142	6.837	7.6178	7.28762	6.97067	7.44337	7.44882	6.81108	6.68971	6.69859	6.89776	6.44211	7.22588	6.94976	6.55066	6.62349	6.73575	6.8772	7.83028	7.8028	8.30285	8.26124	8.48569	8.5115	6.7382
ASB8	7.93229	7.50452	7.62039	7.68812	7.27592	7.45069	7.20402	7.91621	7.73359	6.8676	7.55702	7.50962	7.26567	7.15025	7.38564	7.44661	7.73232	7.47526	7.52685	7.55135	7.48238	6.67847	6.97572	7.36802	7.8831	6.95183	7.3371	6.71167	6.50102	7.57245	7.21025	6.561	7.65003	8.07943	7.66758	7.29886	7.39993	7.49963	7.65579	7.62723	7.75506	7.9013	7.2942	7.88866	7.8076	7.61124	7.45592	8.00278	7.928
RPAP3	7.35836	7.48198	7.99367	8.44835	7.44179	8.14454	6.06299	8.39564	7.73943	7.95733	7.46593	6.72682	6.7974	7.98176	7.49523	7.96376	7.50705	6.11774	8.30624	7.67222	6.70525	6.52173	7.50226	6.9905	7.83828	8.24305	8.71719	7.50363	6.38757	8.51688	6.72262	6.1182	7.31176	6.87657	7.76605	6.51472	6.90773	6.41755	6.56663	6.02629	6.55851	6.09016	8.35463	8.44144	9.37781	8.28603	9.41871	9.21014	9.03782
FNDC4	6.61227	6.90862	7.32165	6.72864	7.09998	6.66865	6.68355	6.73228	7.04926	6.4746	7.02236	6.81868	6.91515	6.87353	6.85054	6.94516	6.91077	7.01623	6.55645	6.92652	6.78166	7.49259	7.04066	7.16651	6.8839	6.94856	6.8889	6.71619	6.82939	7.14757	7.4095	7.14387	6.9079	7.13428	7.20777	7.53587	7.27759	6.86632	6.85604	6.59719	6.75627	7.35394	6.65215	7.41254	6.56707	6.47942	6.45029	6.40865	6.52773
ACSF2	7.48224	7.79143	7.25332	5.85481	7.22666	6.75321	7.82487	6.96426	6.461	6.42936	7.60631	6.85639	6.68622	7.29014	7.64119	8.01027	8.68028	7.02672	7.25009	7.35783	7.61773	6.55949	6.97988	7.38986	7.60675	7.86011	7.39441	7.58829	6.54063	7.45583	7.47862	7.09938	7.25638	7.21326	7.221	7.19646	7.38791	6.65701	7.22318	7.99149	6.83018	7.51062	8.02517	8.52452	6.75963	7.96051	8.28845	7.82152	6.65125
DUSP22	9.61413	8.47874	8.32767	11.1626	10.8687	9.84154	10.3735	9.66889	9.60219	11.5705	9.69704	10.3449	10.0145	10.5975	10.9505	9.47334	9.83093	9.7304	9.28279	8.85258	9.52241	10.109	8.3526	9.34436	8.47403	8.81742	10.0805	11.2371	10.4209	9.85788	9.07936	11.4777	9.94853	9.01237	8.56575	9.8319	10.0227	10.3281	9.66591	9.62059	8.3339	8.68948	9.16279	10.8216	9.80713	10.7625	9.31325	9.53445	9.59793
MED23	7.35422	8.13348	7.40089	8.37738	8.17114	7.62934	7.57766	6.92341	7.68294	8.26865	7.96386	7.83726	7.66469	8.5387	7.42049	8.17542	7.35837	7.6529	7.56465	8.23197	8.00079	6.82586	7.55873	7.14202	7.47387	8.45674	7.41183	8.39231	7.68247	7.86536	7.42644	8.2518	7.91923	6.33973	8.3424	6.86651	6.87892	7.8527	7.79577	8.89161	6.84716	6.84172	7.95489	8.35733	8.57295	8.86779	9.8396	8.97766	8.22948
IGF2BP2	8.90774	6.97846	8.61362	9.7524	7.45587	8.94664	9.1377	9.41299	10.1176	9.84138	8.59031	9.52081	9.09066	9.22159	9.44728	9.85456	8.46774	9.15743	9.27226	9.04052	9.37031	8.3571	8.36127	8.09632	8.97294	10.1108	9.48348	9.35105	9.04897	9.79469	7.5077	9.655	8.96791	8.26525	7.9955	7.98729	7.7528	8.28033	8.07982	7.9658	9.17195	9.4053	5.86052	9.82302	10.5478	8.84983	11.7011	10.9872	7.57727
THOC6	6.93507	5.28846	5.62959	4.90152	5.47535	5.4786	5.47164	5.93317	5.24857	6.91661	5.59151	5.98337	5.33321	5.76864	5.8296	5.963	6.43529	5.36396	6.28263	5.32668	4.96039	5.06962	5.73572	5.90607	5.58327	5.58544	6.20494	5.35347	5.4899	5.57548	5.04292	5.18884	5.65293	5.17574	5.62628	5.65158	5.45682	5.84284	5.78045	6.01735	5.53144	6.05263	7.33319	5.94303	5.48392	5.48703	6.39301	6.16304	5.69975
PPP1R13L	6.80658	7.22038	7.60045	6.00705	7.07929	7.50864	7.61139	7.12657	6.37809	6.41846	6.73747	7.88299	7.52298	6.81649	7.11875	6.61494	7.78822	7.77842	6.66913	8.243	7.91497	7.14264	8.11336	6.90198	7.52246	7.19343	7.22353	7.3949	6.23767	7.62634	6.90272	7.16863	7.25955	7.78215	7.24929	8.48272	7.50621	7.51161	7.63953	7.82825	7.40038	8.00841	7.36645	7.63505	5.97857	6.72655	6.22725	6.6719	5.89698
PPP2R3C	6.91944	7.71619	7.54943	7.392	6.50208	7.19622	6.74903	8.62694	7.94597	7.0562	7.71249	7.16002	6.50319	7.36256	6.98651	6.77181	7.03851	6.36734	5.76187	6.04101	5.69748	6.96018	6.7601	5.52561	6.10279	6.70511	7.49664	7.10756	7.24239	7.28213	7.38624	6.80092	6.98259	6.37925	6.19715	6.62186	7.05867	6.9601	5.9955	5.356	6.59514	6.01835	7.74279	7.48752	8.80621	8.23834	8.57538	7.87472	8.64936
MOSPD1	8.62149	7.03091	7.87184	8.26045	8.63157	8.90267	8.0651	7.68067	7.2506	7.19401	8.56929	7.8721	7.57082	9.01425	8.48248	7.44975	8.02273	6.84316	7.91387	8.02136	7.86167	8.22371	8.29712	7.15625	7.70026	9.11035	7.99862	8.24914	7.06645	7.17134	8.59484	7.77829	7.812	9.04848	7.7922	8.05708	8.2742	7.73597	8.82842	6.88661	7.44821	7.24159	10.1804	7.76168	8.26423	8.41223	8.79619	10.0066	8.58983
DSE	7.3799	7.73201	6.86587	7.03364	7.95472	8.09479	7.94917	6.4298	6.3712	7.95168	6.94029	6.19897	6.19334	6.89024	8.62751	6.08755	7.20399	7.31258	6.29361	5.76785	7.2548	6.95716	7.46637	5.37675	6.86678	7.24786	5.40427	7.95058	7.18931	6.82339	8.16466	8.48347	6.88112	6.03202	7.96831	8.05998	7.49613	8.90332	7.65461	6.47588	7.14351	8.27945	8.68281	8.42236	9.27292	9.23434	10.037	8.63674	8.4366
TPRA1	7.09874	6.98259	7.02665	7.16944	6.57836	7.0417	6.8557	6.91368	6.7868	6.31359	6.38354	6.75286	6.86248	6.21053	6.43273	6.9522	6.57799	6.37577	6.96311	6.50135	7.32408	6.36269	6.51481	6.81224	6.88043	6.68989	6.50748	6.98783	6.82834	6.90547	6.40848	6.58014	6.81968	6.90009	6.76388	6.59304	6.93902	6.75697	6.41565	6.7131	5.89755	6.3165	8.81829	8.41863	7.76501	8.32792	7.90161	8.40882	8.75861
TNFRSF21	9.23425	8.21268	9.16119	8.95819	9.89617	8.87153	9.56772	7.93947	8.28658	9.74361	8.76296	9.2023	7.89334	10.5572	9.9381	9.30305	9.45711	8.91098	8.61477	9.2624	8.91135	9.59713	8.66526	7.47063	10.4119	9.85629	8.7213	9.89563	8.26457	8.62823	8.513	8.15386	8.67635	8.60358	8.88728	8.01446	9.53729	8.63119	8.16219	8.91643	8.42638	9.01865	8.9485	10.0108	9.81453	10.3786	10.986	11.3077	10.6292
ASRGL1	12.3532	9.96639	8.66349	12.0505	9.62797	10.3761	11.4452	9.38911	8.4161	10.2324	10.1466	11.5782	10.5331	9.82476	11.6892	9.82583	10.2954	9.35942	12.4005	10.405	9.86531	10.7549	10.5492	8.46638	10.6104	10.5141	9.68544	9.58296	11.7654	10.3855	8.95734	11.7464	10.417	8.95793	10.8257	9.23489	10.4222	9.71665	10.6606	10.2112	9.38991	9.27387	11.7968	10.4247	12.0789	10.8019	10.8272	12.4822	11.5914
DEPTOR	10.7683	10.727	9.07085	10.2476	7.92928	11.3983	10.3348	9.63042	8.4716	10.3525	7.72052	11.0887	9.39684	9.82344	10.5548	9.31978	9.35426	9.50416	11.43	9.60503	10.386	9.23902	9.15028	8.97516	9.74201	10.6636	7.97902	10.4518	11.5861	10.7952	9.27425	10.9234	10.3472	8.4431	8.66097	9.93594	9.41881	9.99296	10.3135	10.6784	8.15401	9.24793	10.9892	10.9675	12.1516	11.0313	10.9078	10.1662	10.6506
ESF1	8.0059	7.70697	8.28966	8.00163	7.38686	8.222	6.96183	8.15112	8.39574	9.27527	8.46757	8.86445	8.2998	8.02719	7.86729	9.44391	8.14464	7.70036	8.55696	8.61343	8.34423	7.83848	7.72587	7.93444	8.10251	7.3596	8.83602	8.62733	10.3268	7.83987	7.57296	8.12225	7.64005	7.94952	8.18188	5.6178	7.64603	7.70127	8.34192	8.45642	7.96474	7.89394	8.12905	8.19132	9.73278	9.29845	9.23091	9.69299	8.59464
NOC4L	7.18052	6.74341	7.10239	7.01989	6.9358	7.48624	6.95908	7.22684	7.46885	7.04531	7.40621	7.5452	7.30624	7.08697	6.4722	7.57996	6.69231	7.12682	7.56935	7.05495	6.80513	7.43129	7.42828	7.04059	7.13463	7.07343	7.86542	6.92324	7.04618	7.30472	7.63241	7.00035	7.02219	7.05681	7.49802	7.01529	6.95721	7.12433	7.03961	6.90389	6.87567	7.27519	8.18109	7.96758	8.46495	7.34959	7.53469	9.2032	8.39525
RNF25	6.17846	6.02935	6.07214	6.27963	6.17518	6.14453	5.7507	6.19148	6.15297	5.9491	5.93277	6.23047	6.01717	6.42365	6.16605	6.23947	6.28311	6.02682	6.40361	6.12381	5.91658	5.49207	5.98853	6.30513	6.03574	6.32138	6.09157	5.82257	5.9036	6.32178	5.58521	6.16802	6.36718	6.47821	6.2865	6.1429	6.3115	5.65896	6.23095	6.28452	6.24592	6.10462	6.5767	7.11902	6.96754	6.55877	7.08153	6.75849	7.11779
ASB13	9.19212	9.1106	9.31441	9.01035	9.28928	9.2411	9.2445	9.23887	9.19854	9.01354	9.27512	9.39122	9.37431	8.72742	9.02069	9.24614	8.95216	8.66792	9.34164	9.54606	9.06778	9.59326	9.11678	9.38616	9.30035	8.95853	10.0698	9.3418	9.57865	9.17284	9.38977	9.3471	9.35046	9.54306	9.2445	9.452	9.64629	9.3019	9.62341	9.60726	9.19761	9.28669	9.46521	9.7343	9.1555	9.18717	8.82807	9.17338	9.62365
2019-03-01	8.71068	8.31607	8.0259	8.59324	8.28516	8.23799	7.75347	8.02555	8.48601	8.71837	8.17848	8.39813	8.6018	8.09072	7.94738	8.8057	8.7019	8.15816	8.89144	8.12387	7.80904	8.21392	7.67791	8.27448	7.98066	7.89596	8.707	7.81348	8.4557	8.08418	8.41198	8.05241	8.69039	8.38338	8.40263	7.90468	8.22703	8.00499	8.27901	8.30392	8.30567	8.31886	8.90471	8.45006	8.30489	7.77062	9.06094	9.30348	8.99446
POLR3K	6.55008	7.24177	6.92721	6.83673	6.95752	6.47929	5.8284	7.60289	6.53785	6.59131	6.37254	6.49494	5.86985	6.15867	6.43271	5.78179	6.63541	5.81173	6.55008	6.37979	6.47945	6.55875	6.11903	6.1832	6.38604	6.59041	6.51581	6.32397	6.45759	6.44191	6.1231	6.07172	6.89222	6.32544	6.48108	5.9514	5.86624	6.22302	5.64006	6.01616	6.64162	6.30035	7.6571	7.0522	7.03513	6.93374	7.47756	7.62528	7.08279
ACTR3B	6.82458	6.38388	7.10272	7.14677	5.59303	6.89936	6.41896	7.13463	7.66018	8.12257	7.81439	6.51501	7.36987	6.69992	6.07683	7.52392	6.96566	6.30493	7.40164	7.18608	6.9798	7.56049	6.15905	7.34047	6.62214	8.02589	7.24496	6.53715	7.15688	6.5186	5.91682	7.29757	6.72458	6.58261	7.01383	5.55868	6.40601	6.12628	6.97415	6.28254	5.89443	5.93183	8.28317	8.22339	9.07218	7.89022	9.28974	9.48148	9.00236
MLYCD	6.40987	6.65432	6.84451	8.57223	7.60122	7.26459	6.4728	6.86075	7.11203	6.74388	7.05999	7.1578	6.87304	6.87258	6.90874	6.98083	6.77959	7.05157	7.76	7.01009	6.54643	7.08306	7.00599	7.02176	7.0818	6.91299	6.74172	6.98312	6.97861	6.88515	6.67538	6.23188	7.18478	7.03197	6.95437	7.17954	6.52685	7.14718	7.10666	6.90758	6.65663	7.17076	7.26592	7.35963	6.84053	6.74247	6.88479	7.37884	8.04445
CSGALNACT2	9.2782	9.43774	9.20761	9.19078	9.20289	9.74037	9.41749	7.99676	8.13873	9.95895	8.93646	9.47253	8.94115	9.87391	10.0045	9.17711	9.55709	8.73503	8.68848	7.84634	8.26972	9.21542	9.20933	8.51015	7.91612	9.39824	9.25603	9.8249	10.047	9.22984	8.65487	10.7176	8.67993	7.70072	8.28817	8.49331	9.36002	9.5396	9.39946	8.07026	8.91666	8.37162	8.80463	8.67165	9.46634	9.95499	10.4848	10.0879	9.36875
TESC	6.02357	5.98444	6.06168	6.11702	6.08125	5.86262	5.70245	6.36042	5.99177	5.49116	5.48101	6.00664	6.29163	5.84089	5.92939	5.45784	5.86928	6.17669	6.15291	5.75844	6.10493	6.12519	5.85578	5.91084	5.83765	5.85164	5.62036	5.66075	5.73118	6.10447	6.82239	6.49421	5.99451	5.94654	6.15246	6.7769	5.87058	6.19023	6.32247	6.06661	5.73087	5.89545	6.02463	6.4966	6.13459	5.33183	7.34911	5.58014	6.26986
GON4L	6.76641	6.90758	6.75166	7.13961	6.81381	7.25324	7.25011	7.11651	7.01244	7.2504	6.94306	7.34086	7.29958	7.0695	7.04416	7.71418	7.01413	6.70896	7.31192	7.19856	6.78784	6.36818	6.67599	6.97507	7.44619	6.92841	7.21132	7.38893	7.34439	6.85431	6.68192	6.68185	7.03251	6.94177	7.07423	6.7052	6.99918	7.10263	7.37272	7.24096	6.99386	6.77832	8.04778	7.21547	7.75025	7.61433	7.04945	7.47393	8.27545
ATAT1	6.9974	6.98207	7.05533	7.39416	6.82096	6.81627	7.09	6.78414	7.49017	6.76883	6.98207	7.25088	7.42559	7.10337	6.91088	7.62661	7.04898	7.24462	7.38061	6.90484	7.27104	7.59006	7.41318	7.5365	7.02659	6.74223	7.78682	6.85037	7.22943	7.22963	6.98342	7.08232	7.35423	7.5718	7.0566	7.64525	6.93317	6.849	7.44389	7.60673	7.96005	7.47162	6.01317	6.77913	6.35867	6.64954	7.32053	6.27605	7.12002
FBXO5	6.81401	8.01685	6.58542	6.2786	8.33684	7.09368	7.34298	8.05063	7.44568	8.68306	7.92538	6.86641	5.99787	8.14172	6.50686	8.60382	7.2056	7.00341	6.60276	7.69405	6.70269	6.65823	7.74859	6.15965	7.35238	8.21074	8.37607	7.19911	5.55478	7.34202	7.19999	5.85083	6.71201	4.99393	7.18075	6.67237	6.99608	7.25706	7.20018	6.76626	7.10384	7.15283	7.88029	8.69142	8.72613	7.78463	9.3002	8.84782	8.66249
TPPP3	7.91655	6.57873	6.65812	7.65083	5.53256	5.75257	5.76038	6.33318	6.53256	5.65353	7.4893	5.98818	9.9358	7.91467	6.54301	6.10995	6.70455	5.41755	7.87103	5.82823	5.03775	6.2575	6.50466	7.99971	5.78514	6.04548	6.23675	5.49965	6.36755	5.57121	6.11528	5.73582	6.48151	5.87046	6.66328	6.0443	5.78824	5.26441	7.37045	5.79726	5.80912	5.55634	6.91274	6.99669	10.7472	6.65517	8.24888	7.98496	9.75021
TRMT11	7.06851	7.92981	7.01176	7.41699	7.17385	7.3984	7.12806	6.82171	7.73807	9.78102	8.38366	7.90398	7.64198	8.15323	7.76482	8.18517	7.36008	6.75696	7.16089	7.63297	6.99292	6.93802	7.19062	6.90125	7.1315	8.08054	7.94282	7.79067	7.57328	6.85222	6.59621	7.24042	8.17988	6.64259	8.1182	5.97051	6.7631	6.4733	7.3934	9.294	6.13454	6.85146	8.03316	7.68588	8.60929	8.66974	8.74686	9.55112	8.49273
SIRT1	7.9131	7.71839	7.32544	8.08409	7.39478	8.56165	7.78945	6.60576	7.14964	8.83136	8.41366	8.0163	7.87109	8.15484	8.25289	8.81449	8.26705	7.19777	8.5805	7.10392	6.96491	7.11156	7.63744	8.46699	7.04551	8.0174	8.62399	7.96738	7.8969	8.18067	7.60364	7.87832	7.38808	6.61722	7.30182	6.72517	6.74843	7.34249	7.40891	6.9644	8.20658	7.25355	8.48786	8.75786	8.22301	9.09941	10.3331	8.19256	9.00311
MTHFSD	5.72627	6.26145	5.68364	6.16754	5.96082	6.01297	5.67498	5.9064	5.8394	5.77901	5.92318	5.98452	5.9314	6.24732	5.8088	5.99153	5.81082	6.13842	6.29726	5.60864	5.86228	6.41945	5.87653	5.99479	6.27992	5.8248	5.99153	5.75451	5.98452	5.96289	5.84019	5.77798	6.0855	6.30469	6.08222	5.84651	6.59808	6.16565	5.99315	6.12981	6.16464	5.96992	5.91247	5.87593	5.5677	5.65773	5.60011	5.73433	7.35471
WDR3	10.3081	10.0142	9.2756	10.6773	9.2244	9.81901	9.24233	9.23672	9.72411	10.2867	9.71462	9.66426	9.32755	9.56127	9.4589	9.98524	9.43796	9.10767	9.77697	9.77837	9.10073	9.62562	9.07691	9.14003	9.33117	9.60732	10.4962	10.1564	10.4794	9.53209	9.09156	9.86491	9.79539	9.17274	9.81852	8.73845	9.21418	9.15814	9.43753	9.04452	8.84994	8.61624	10.6158	9.79574	10.8926	10.437	10.0957	10.9648	11.1417
CENPU	7.99256	7.19077	7.78857	5.36779	8.07766	7.79611	7.98949	8.55362	7.38235	7.98284	7.52542	6.54177	6.18633	8.01542	6.59478	8.08208	8.24353	7.61951	7.91442	7.46818	5.53342	7.95234	7.58353	6.5292	7.88698	7.24726	8.67056	7.41464	6.64325	8.10215	7.96088	7.79258	8.14115	5.721	7.27437	6.41756	6.91476	7.00492	7.51469	6.9352	6.83023	6.66563	7.56478	8.62561	9.47806	9.4506	9.10572	9.35793	8.27987
GALNT12	9.48678	8.11389	7.89598	8.12678	9.62161	7.04452	9.05048	8.67302	9.79558	9.16507	8.22354	7.51654	9.76392	7.62278	8.92561	8.45867	7.78162	7.39228	9.06515	8.26138	9.62524	6.88467	7.03073	6.18665	5.93185	8.2242	7.72553	7.71922	7.98438	9.16692	7.08383	9.42989	7.88164	8.01902	6.99174	6.41667	8.43702	7.08018	7.68349	7.77739	7.56846	6.77439	10.4191	8.76518	8.79175	9.65731	10.2461	9.88937	9.98241
PAK1IP1	7.94848	6.38419	7.86352	8.49352	8.38354	7.39101	6.90136	7.51093	8.27656	9.00608	7.77846	8.12419	6.36385	7.71595	8.07533	8.18071	8.19572	6.55128	8.06358	7.7994	6.72815	7.88116	7.02257	6.99248	7.99545	6.42467	8.55902	8.51129	6.64366	8.6535	7.52555	8.22485	7.65237	6.47922	8.0145	7.17404	7.38897	7.3706	7.53498	8.09501	6.9898	7.10733	6.84512	8.35124	8.09703	8.09105	7.99558	9.86099	8.76288
NETO2	5.52247	6.5175	5.47485	7.40194	6.6077	5.99871	6.39305	6.94261	5.7549	8.82953	9.52335	6.42087	4.83994	6.29297	6.31285	8.14165	8.67567	5.9962	6.22656	7.3989	5.46129	8.15867	6.04016	5.58721	6.36542	6.13416	7.16166	6.93164	5.57583	5.2667	6.26914	4.91019	5.78478	6.57636	6.85241	5.90266	5.39489	7.44923	8.31044	4.97633	6.48443	7.19869	6.11495	9.13154	7.02391	5.7976	10.931	5.69045	9.55448
NOC3L	8.88255	7.76777	8.22081	8.72545	8.13149	8.68383	8.72319	7.91841	8.6935	9.40498	8.20535	8.42892	8.53531	8.7259	8.62169	9.07014	8.53319	7.74364	8.18245	7.78548	7.41451	7.39674	8.00171	8.39788	8.57947	8.47761	9.34687	8.31897	8.6469	7.94198	7.41325	7.60761	8.28195	7.23192	8.27479	7.59773	7.68475	7.6197	7.96212	7.19614	7.68459	7.58714	10.1901	8.7854	9.85138	9.26887	9.88053	9.55503	9.01507
MRPL35	7.70353	8.57146	7.38691	7.73272	7.54912	7.73546	8.02428	8.23762	7.96788	7.20981	6.67258	8.32098	7.39508	7.84786	8.12967	7.38421	8.06428	7.14994	7.56709	7.92323	7.17182	7.32677	7.20995	7.53102	8.20925	7.82503	7.81929	8.29041	8.1965	8.56765	7.45662	7.57687	7.66628	8.15559	7.429	7.21862	7.22749	7.49777	6.86195	7.24025	6.73554	7.09303	9.52901	8.02033	9.77903	8.82174	8.69415	9.40736	9.14969
ARMH3	8.3466	8.42772	8.42621	8.58919	8.51597	8.6114	8.43242	8.46655	8.72876	8.25809	8.56572	8.39151	8.94305	8.48253	8.39786	8.48139	8.53548	8.60979	8.37166	8.42352	8.40373	8.58831	8.6548	8.52044	8.69208	8.36135	8.55529	8.50212	8.50803	8.67554	8.54877	8.29542	8.81051	9.00613	8.91231	8.86129	8.71048	8.76162	8.87024	8.71145	8.78113	8.82231	8.70867	8.7085	8.10825	8.31462	8.16999	7.95503	7.99303
ISOC2	6.79301	7.37105	7.55094	7.07756	7.62973	7.24434	6.8157	7.30318	6.28963	6.25942	6.05895	6.46021	6.88093	6.80452	7.01529	7.05726	7.23799	6.60898	6.94904	7.18678	7.02527	7.32733	7.24204	7.3109	7.20141	6.68353	6.93569	7.66285	6.52134	7.1627	6.18181	7.09739	6.68919	7.19923	6.83589	6.78387	6.75277	7.05722	6.64003	7.65504	6.83334	6.49806	8.5449	7.97541	8.72309	7.98259	7.22218	7.34991	9.0621
MAGOHB	6.83348	6.90439	7.46797	6.91472	5.95539	6.39769	6.79544	6.52053	7.44272	7.15603	6.95103	6.8526	6.14249	6.45514	6.97999	7.58065	7.10453	7.65097	7.16883	7.14798	5.62167	7.11157	6.56468	6.46149	7.09779	6.942	7.76646	7.91834	6.05833	7.27619	5.93261	6.57704	5.8124	5.9964	7.07098	6.19433	5.8408	6.23455	7.06364	6.33629	6.85317	6.06451	6.68931	8.6076	7.7567	7.39957	8.12492	7.63944	8.33835
GPATCH3	6.64756	6.87491	6.98607	7.02531	6.96581	6.88522	6.82627	7.1928	6.99705	6.9473	6.98004	6.99195	6.95004	6.66789	6.96284	7.1437	6.8484	7.04118	6.74875	6.7969	6.85948	6.82234	6.90853	6.9899	6.89344	6.98097	6.98797	7.00605	6.91356	6.84638	6.8268	7.04276	7.13103	7.35461	7.16061	7.41019	6.88142	6.52954	7.0245	6.86347	6.85977	7.09738	7.57184	7.16981	7.30541	7.39898	7.0948	7.14482	7.38839
NCBP3	7.29575	7.20961	5.82736	7.43896	6.73575	6.61278	8.47884	7.55511	7.35681	8.84892	7.6133	6.23805	7.59133	7.0461	7.32726	8.35777	7.4835	6.51116	7.4299	7.33063	6.11549	6.66516	6.5164	7.61691	6.27361	7.71887	8.09864	7.89933	8.01623	6.99662	6.50601	6.65189	6.50561	6.21979	6.9814	6.5335	7.20975	6.96508	7.74607	7.81554	6.98767	6.94934	7.07683	7.58773	7.79869	8.58321	9.63191	7.78734	7.88037
TMEM177	7.90718	8.30418	7.85333	7.41615	7.31256	7.97318	6.72469	8.35073	6.81813	8.12984	6.98157	7.28234	6.92792	7.88697	6.37369	8.00984	7.31578	6.61535	7.58135	7.43065	7.31399	7.5657	7.23952	6.33683	7.34895	6.97077	7.84902	8.21044	8.69327	7.49319	6.33507	7.16057	7.58555	6.48651	7.44477	7.15226	7.58514	6.91978	7.25689	7.03939	6.96669	6.76658	7.96133	8.28271	9.44753	7.33822	7.40767	8.17688	9.15018
FAM57A	7.67734	7.24523	7.24082	8.66841	7.24014	6.9193	8.72552	7.56124	6.4553	8.37257	8.06338	7.59308	7.6228	7.71455	7.59935	8.22116	7.59969	7.57149	8.02908	7.03759	6.83878	7.41042	7.60252	7.84251	6.53543	8.31238	8.42065	7.79073	6.78213	6.56282	6.40846	6.84156	7.38847	7.72186	6.9066	7.20486	7.24366	6.79174	7.80575	6.89076	7.26885	6.99791	7.08977	8.28883	7.11881	8.2726	9.79659	8.50614	7.49793
CNNM4	6.43407	7.34766	6.2778	6.73264	6.76515	6.21229	7.23031	6.58978	5.93128	6.60528	6.42596	6.53175	6.87317	6.26556	6.50592	6.33932	6.43947	6.42538	6.47631	6.17406	6.83529	6.02987	6.18231	6.39795	6.66964	6.85095	6.3347	6.79965	7.07025	7.48025	6.71748	6.00106	6.18152	6.08277	6.1143	6.0139	6.31799	5.819	6.15341	7.01186	5.69015	5.86146	8.02358	6.78221	7.50524	7.75101	6.97973	6.31943	7.15958
PLSCR4	9.3877	9.07466	8.6735	8.83448	8.75161	8.4874	9.65446	5.57523	8.20526	8.88977	8.79798	8.76377	8.96933	8.25171	9.06208	7.62508	6.94165	6.79926	8.59949	8.0569	8.68222	6.99986	7.74937	9.54199	7.96419	8.31864	5.73761	9.33805	9.95772	6.31401	9.30217	9.16934	9.06848	7.35942	9.44752	7.53411	8.38183	9.3234	8.67338	8.76889	6.92496	7.74723	11.7875	8.93376	10.3255	9.55258	5.3987	10.4832	10.1925
NOTCH1	7.10681	6.72664	7.33695	6.66745	7.37616	7.25535	7.54557	7.05839	7.53108	8.11647	7.31611	7.71219	7.47942	7.43231	7.69457	7.67955	7.50481	7.55857	7.28903	7.24785	6.80063	8.16486	6.56512	6.98187	7.08532	7.06107	7.68608	7.48024	7.94506	7.91149	7.56717	7.05075	6.94198	7.25834	6.60714	7.33755	7.37686	7.28202	6.76394	7.51248	7.01561	7.42759	6.57007	7.45891	7.67964	6.78427	8.59121	7.97335	7.06204
NABP2	6.19117	6.48467	6.23397	6.57579	6.44533	6.19117	5.62413	6.34242	6.26049	5.78294	6.26591	6.28987	6.16333	5.72106	6.19117	5.92215	6.34966	6.14532	6.13207	6.54851	6.5057	6.19604	6.17676	6.4316	6.59478	6.30385	6.72491	5.67953	5.50866	6.08772	6.39614	6.08608	6.65463	6.65788	6.531	6.28782	5.86074	6.11955	6.37392	6.44728	6.61482	6.61009	6.28965	6.98215	6.9287	6.44777	6.93258	7.16123	6.67198
INTS8	8.56268	9.42569	8.26672	8.43826	8.03432	9.45419	9.54768	9.04724	8.66396	9.3755	7.87823	9.1512	8.39877	9.175	9.1112	8.71005	8.68866	8.50716	8.97416	9.10855	8.89543	8.73131	7.65957	9.93394	8.97326	9.34622	8.69052	9.72673	9.45311	9.11251	7.92755	9.81881	7.90754	7.12597	7.93639	8.12559	9.21024	9.13309	8.7861	9.37073	8.30769	8.32657	8.99047	9.25574	10.5163	10.8111	9.70377	9.54278	10.3398
KLC2	6.83548	7.28187	7.03204	7.13079	7.08088	7.138	7.00863	7.36887	6.88921	7.31409	7.47484	7.09876	6.94514	7.11045	7.32851	7.15807	6.7605	7.4971	6.93114	7.73804	7.13702	7.63935	7.36536	6.96463	7.31501	7.62963	7.4222	7.61737	7.08083	7.44097	7.23227	7.10835	6.95745	7.32006	7.12571	8.17877	7.45468	7.28506	8.22372	7.83315	7.7595	7.21718	7.50305	7.71461	7.39652	7.56136	8.13753	7.24723	7.60983
LRRC61	7.26342	7.01523	7.48467	7.48755	7.32718	6.96466	6.90983	7.32594	7.71219	6.90466	7.47451	7.41475	7.51389	7.10225	7.21301	7.31956	7.2296	7.36866	7.25059	7.09885	7.60957	7.52154	7.26441	7.2858	7.01219	7.06654	7.49727	6.85237	6.72121	7.31283	7.08754	7.47692	7.75151	7.42615	7.61396	7.7403	7.39888	7.3062	7.48311	7.53181	7.73986	7.3702	8.28365	7.4298	7.76952	7.09905	7.88105	7.87485	7.45878
ASPSCR1	5.76926	5.4049	5.54854	6.2846	5.8359	5.91672	5.88781	6.10825	5.3718	5.73839	5.73266	5.97164	5.488	6.4473	5.52091	5.97765	5.64783	5.18779	5.67291	5.72663	6.70698	5.048	5.56197	5.63982	5.5075	5.81188	6.47788	6.01952	5.5538	5.32768	5.97811	5.42377	5.60814	5.54306	5.44198	5.15058	5.72283	5.21728	5.89963	6.44448	5.2512	5.8745	6.43162	7.33624	7.27402	6.99383	6.64182	7.39125	7.17319
RPS6KC1	7.50728	7.6912	6.82534	6.82608	6.57344	6.65748	7.13577	7.04781	7.63832	8.45397	7.71712	7.66589	7.43585	8.01248	6.91512	8.82557	6.7077	6.99516	8.50934	7.56293	6.26937	7.36261	6.64658	6.99058	7.70429	7.50535	7.8304	7.94675	6.80043	7.06433	7.20122	7.65558	7.34988	7.0554	7.56221	5.95191	6.94221	7.09584	7.67213	6.31646	6.69832	7.31958	8.12824	8.35815	8.82814	8.02378	9.35581	7.90509	8.23969
ANO10	6.52769	7.81699	6.46352	7.04335	7.47696	7.37373	7.10449	7.45451	6.06587	6.65923	8.27761	7.06406	6.74476	6.99792	7.08194	6.85264	6.81989	7.59023	6.75706	6.99757	6.93159	6.72069	7.49632	6.99979	7.13546	7.31441	7.20435	7.39894	6.56475	7.0456	6.23029	6.72011	7.16175	7.05025	7.36343	6.58676	7.56989	7.1135	6.89564	7.54118	6.7408	5.95613	7.27827	8.09309	7.0531	7.24404	7.37831	7.24156	8.22404
YEATS4	6.88643	7.08538	6.18869	6.59416	6.19825	7.02086	6.89982	6.02454	6.95192	8.22509	7.6215	5.93029	6.75392	6.46078	6.39348	8.10066	7.04527	5.31966	7.07786	5.29473	6.24641	5.95708	6.27551	6.16046	5.87422	7.23232	7.59559	6.02731	5.36069	5.89186	5.8994	5.14737	6.30528	5.07043	6.31373	5.43467	5.47216	5.37367	6.29814	4.45235	8.16299	5.81701	7.79927	8.0766	8.27436	7.59218	7.91458	7.85241	7.84238
GCC1	7.38541	7.65764	7.66021	7.87846	7.6177	7.4599	7.82686	7.64349	8.05567	7.50577	7.59607	7.45632	7.59607	7.8236	7.50239	7.56742	7.4569	6.82347	7.92181	7.21993	7.13798	7.57876	6.99228	7.39524	7.46554	7.36952	7.38391	7.48008	7.84832	7.52191	7.63014	7.68023	7.2749	7.25269	7.09498	6.65852	7.21438	7.21596	7.02949	7.02859	6.27732	7.15863	7.75972	7.86612	7.74478	8.11586	6.9705	8.10786	7.89627
GMIP	6.54827	6.62504	6.3892	6.44068	6.73589	6.56217	6.49398	6.31404	6.85903	6.01153	6.22309	6.50492	6.05469	6.28082	6.25754	6.16394	6.32059	6.68957	5.99122	7.19507	6.38224	6.61923	6.37158	5.85324	6.67113	6.89049	6.53285	6.48862	6.42211	6.90711	6.40861	7.04053	6.75113	6.54827	8.12193	6.81356	6.89605	6.39849	6.27024	7.10614	6.57172	6.82721	6.69898	7.49082	6.90009	6.77309	6.74628	7.34506	7.51204
RRNAD1	6.36147	6.2647	6.40716	7.36806	6.13936	6.34941	6.66499	6.58414	6.71184	5.94452	6.00006	5.97996	5.9384	6.02971	5.85501	6.25643	6.21935	6.34865	6.46675	6.1828	6.41172	6.49398	5.99986	6.70513	6.14483	6.46659	6.561	6.26728	6.15695	6.24894	6.35595	6.46853	6.29276	5.82731	6.37725	5.95209	6.16951	6.11451	6.16726	6.29035	5.94164	6.04465	7.22636	6.79833	6.97024	7.33895	6.3493	7.27972	7.8671
NF2	7.90066	8.20782	7.93762	8.819	7.9526	7.55542	7.59017	7.82884	8.20743	8.68295	7.59196	7.82984	7.70565	8.20192	8.49091	7.91259	7.80226	8.47565	7.53728	8.38597	7.76364	8.43728	7.594	7.87612	8.45432	7.62698	7.79069	8.2742	8.34028	8.23536	7.55509	7.82387	8.04886	7.7088	7.77912	7.45325	7.61862	8.0291	8.29996	7.75559	7.86365	7.88338	8.21315	8.20967	8.17853	8.56923	8.68238	6.51437	8.35139
ARID1A	8.48617	7.76105	8.66689	8.70667	8.48544	8.51848	9.07276	9.35351	8.66889	9.55461	9.45804	8.63707	8.70569	9.17377	8.60631	9.62333	8.62655	8.19092	8.66835	8.6273	8.30161	8.66069	8.27588	8.55661	8.39295	9.47767	9.50581	9.09195	8.88403	8.19896	8.21278	7.95274	8.92325	7.61175	8.71118	8.01639	8.90111	8.6099	8.35455	8.13484	8.21705	8.03726	9.83464	8.84975	9.56147	9.28458	9.29669	9.80329	8.727
MAN1C1	6.93447	5.91544	6.70084	6.57493	5.95686	6.37451	7.01571	5.73524	6.10499	6.06491	5.92531	5.70885	6.03188	6.21529	6.91124	5.7248	5.70735	6.24212	6.02032	5.91898	6.53258	6.43778	6.36072	6.67828	6.32569	6.57099	6.36052	5.83301	6.50492	6.54296	6.60168	7.16735	6.28059	6.49632	6.34649	6.66849	6.32484	7.21886	5.98277	5.75035	6.35936	6.79359	6.37183	5.85396	7.10347	7.27817	8.91175	7.60802	6.83094
ZFAND1	8.14806	9.29258	8.43379	9.07785	8.05307	8.76008	8.8599	9.2526	8.57861	10.2083	9.01775	9.20391	10.0971	10.157	8.99719	9.34352	9.08302	7.83624	9.73587	7.4126	8.56348	7.93063	7.47979	9.02747	8.47894	7.25831	8.64265	9.17463	8.73638	8.54342	8.45355	9.20636	8.55632	8.66587	6.50042	7.56362	8.26002	7.47524	8.1087	7.13557	8.28487	7.39215	10.571	7.89865	10.6937	10.026	9.04477	9.81344	10.1284
FAM193B	7.89178	7.45822	7.80487	7.9674	7.75846	7.46109	7.63278	8.07074	7.69821	7.64946	7.8443	7.83617	7.74625	7.48327	7.61249	7.57184	7.76035	8.01529	7.93518	7.96188	8.00064	7.79264	7.70365	7.88845	7.54269	7.76899	7.75444	7.75093	8.15079	7.97862	8.03121	8.36152	7.67891	7.6272	7.88187	7.38046	8.06703	7.5686	7.75087	8.05293	7.79924	7.69103	7.55352	7.34952	7.01726	7.16584	7.05558	6.92327	7.3117
CERS4	5.03948	6.17426	5.44613	5.58741	5.69818	5.38391	5.79319	5.49765	4.97637	5.46081	5.734	5.17158	5.37058	6.28801	5.47736	6.15138	5.60343	5.47447	5.78777	5.25906	5.79318	5.20378	5.41741	5.68211	6.17489	5.50136	6.10836	5.47445	5.6911	5.31837	5.45807	6.22484	5.49751	5.61162	5.47115	5.75929	5.65385	5.30842	5.44235	5.35648	5.0715	5.55899	6.29784	6.89629	5.85569	5.76285	8.12597	7.42105	5.6292
CTBS	7.62107	8.50002	6.20296	7.3773	7.52173	8.13211	8.05703	7.38685	7.11698	7.30867	7.59967	8.51715	7.60473	10.2007	8.52094	7.75876	7.83697	6.99314	9.29714	6.94373	7.88177	6.9392	6.94554	6.24911	7.58014	8.21916	6.12331	7.70947	7.82097	7.78087	8.05488	8.37287	6.47446	6.65843	7.02433	7.25322	7.27354	7.52399	8.92062	7.22925	6.34385	6.4724	7.46037	7.26914	8.38481	7.85939	7.43249	7.82391	7.96817
MYNN	8.69083	9.06435	8.3061	8.28291	8.02822	9.05241	8.70195	8.14823	9.4886	10.2798	8.58934	9.06668	8.93531	8.67551	8.99327	9.9015	8.42663	7.81497	9.4384	8.03324	7.40949	8.54375	8.37358	8.07634	8.62791	8.25561	8.45676	9.73819	9.12904	8.55154	7.94648	8.53647	8.09913	7.89238	8.2879	7.64385	8.07286	9.0505	7.66703	8.32381	8.36788	8.79256	9.45289	8.77376	9.82423	8.50153	9.57878	11.0122	10.0202
CHST12	6.45466	6.94283	7.51991	7.02952	6.36988	6.70111	6.01157	6.73628	5.77944	5.83911	6.56268	6.50767	5.853	6.38553	6.6917	6.10045	6.0429	6.57124	5.87475	6.91243	6.74858	6.58191	6.9003	6.25382	6.73574	6.06304	6.51418	7.28129	6.08211	6.45603	5.83936	6.69409	6.24971	6.42402	6.46078	5.69609	6.85692	6.61531	6.02405	6.78642	6.10025	6.34225	7.4002	7.69944	7.33144	6.4158	7.77451	8.34797	7.84515
SLC37A1	6.91278	6.14398	6.25538	6.74742	5.33858	6.24596	6.98526	5.71941	6.51086	5.48148	6.24676	6.42457	6.03307	6.52111	5.96183	5.59676	5.49408	6.50377	6.31823	6.4242	6.18671	5.72745	6.40145	5.95127	6.1557	6.66438	5.95507	6.31018	6.28455	7.02118	6.60102	6.55938	5.95122	6.15758	6.12092	6.45794	6.38167	6.08101	5.88262	6.12063	5.95231	5.37531	6.82504	6.59437	7.27442	7.39597	5.90763	6.45897	6.54585
CDKN2AIP	6.07605	5.32159	6.19597	5.48637	5.06549	6.39988	6.81025	5.72509	6.28093	6.66068	6.888	5.87392	6.7332	6.13814	6.2812	6.33993	7.49535	5.46977	6.91343	6.08497	4.82233	5.57662	5.4672	5.85802	5.78192	6.05196	6.3846	6.44223	5.41111	6.44924	4.77518	5.75878	6.1328	6.6113	5.85783	5.21952	5.48003	5.93947	4.90573	5.28694	6.74665	5.97721	6.59078	6.49223	7.38724	8.16181	7.39619	6.78975	6.76658
RAB17	7.4017	7.08848	6.95399	8.12748	7.03791	7.38417	6.768	6.81304	6.9385	7.04405	6.8624	7.41329	8.33994	7.35385	7.10247	7.12561	7.08728	6.36907	7.76715	7.40877	7.20115	6.53645	6.52634	6.76219	6.30088	7.14756	7.11795	6.68176	8.71922	6.58435	6.36382	7.50851	7.71479	7.07389	7.15461	6.67625	6.22117	6.44431	7.04929	7.47021	5.74529	6.24029	9.38987	7.4409	8.11024	8.45426	8.41753	8.29479	8.24287
ZNHIT6	7.35051	7.29223	7.31586	7.47229	6.94717	7.70537	7.46626	7.25524	7.48085	8.3038	7.71566	8.09095	7.68256	8.05363	7.74986	8.50402	7.54866	6.47433	8.64366	8.09025	6.92981	7.539	6.83585	6.9426	7.1812	7.26648	7.65	7.7067	7.64811	7.09751	7.36183	8.27416	7.58815	7.29639	7.32026	6.39356	7.26958	7.18022	7.51924	7.09295	6.06829	6.74308	9.06204	7.45114	9.27121	7.88617	8.12673	8.80093	9.01284
HSPB7	6.77102	6.62666	7.10682	6.79841	6.96137	6.9508	6.90239	6.94375	7.12385	6.68688	6.91282	7.04049	6.77961	6.70898	7.00053	6.83416	6.98939	7.2335	6.78447	6.8468	7.08442	6.95679	7.06977	7.05211	6.95492	6.76866	6.98318	6.85126	6.66116	7.08273	6.99661	6.70767	7.14067	7.87685	7.08644	7.52772	7.17182	7.23222	6.91371	6.94915	7.0581	7.34816	6.65101	6.8138	6.66059	6.67154	6.58413	6.71485	6.48641
CCDC59	8.46092	7.73821	7.71366	8.5599	8.37643	8.71828	8.32781	8.58598	8.35071	8.36521	7.07332	8.09247	8.27768	8.25188	9.01194	8.91581	8.43375	7.78092	9.23753	7.84339	7.04909	7.43888	8.37643	7.96512	9.06411	8.6127	9.60439	8.81053	7.29655	8.6932	8.47674	8.37618	8.05219	6.99692	8.44781	7.38024	7.12237	7.7425	8.60497	7.15339	7.53477	7.38822	8.95569	8.80941	9.3342	9.1448	9.6675	10.0443	9.66209
ZSCAN32	7.34177	7.55008	7.59626	7.63436	7.49526	7.56773	7.099	7.45185	7.79024	6.73381	7.54053	7.32249	7.49296	7.11829	7.42987	7.0889	7.32249	7.66882	7.61972	7.08873	7.6779	7.4012	7.76682	7.57714	7.21986	7.34031	7.78491	7.03219	7.47909	7.5008	7.34688	7.32855	7.41213	7.49938	7.4535	7.28683	7.31941	7.52245	7.55194	7.16553	7.66597	7.52146	7.17745	7.0892	6.9643	6.81749	7.53089	7.4626	6.93349
FBXL15	6.83399	6.48926	7.12729	7.44302	6.31132	6.96922	6.14673	6.69789	6.69839	6.83538	6.00554	6.32057	7.01825	7.25901	6.50145	6.85258	6.94768	6.59422	6.50333	6.22327	6.09017	6.20224	6.86796	7.03665	7.02334	6.49865	7.29018	7.0031	8.17185	6.91247	6.36022	6.27868	6.96168	5.57395	6.94035	6.7035	6.43776	6.61626	6.51655	6.02486	5.98952	6.18873	8.21939	8.51727	7.82568	7.8371	8.13823	7.89006	7.8255
VCPKMT	7.62713	7.36942	9.14586	7.53141	7.73828	7.97526	8.12648	8.50011	7.23286	7.66433	7.91649	6.48886	7.15199	7.7078	6.74226	7.44988	7.5392	7.72159	7.99105	7.55036	6.22791	7.30032	7.69517	8.86001	7.56468	7.18426	7.91138	7.35532	7.52971	8.45193	8.00183	6.88272	7.48157	5.43112	7.799	5.92757	7.53185	7.18511	7.81109	8.28722	6.79454	7.04479	8.21025	8.01567	9.01809	9.15474	9.23812	9.41812	8.23215
PIP4K2C	10.1686	10.0265	9.67224	10.9344	10.7718	9.98125	9.9548	10.3578	10.1412	10.134	10.3328	10.1296	9.72742	9.53219	10.3072	10.3903	9.65048	9.20073	10.4845	9.51293	9.36226	9.16176	9.60085	9.46426	10.3328	10.2162	10.6447	9.88512	9.73023	10.2792	9.58001	10.2154	10.1136	10.0837	9.97044	9.27634	9.47292	9.12636	10.7012	9.51361	9.62083	9.63033	11.8474	11.5942	10.4632	10.2655	11.146	11.169	10.2662
PYCR3	6.52658	6.42807	6.45031	7.40522	5.06948	6.96569	6.15937	6.13	5.89894	5.63453	5.65561	6.65493	5.49515	6.27696	5.93219	5.95015	6.23592	5.87164	6.19087	6.15966	5.96201	6.42543	6.28041	6.31791	6.42096	6.56033	5.77904	6.85011	6.55666	5.87297	5.95207	7.14423	5.78709	5.44155	5.35422	6.60951	6.72574	6.38364	5.87545	5.27811	5.86623	6.00656	6.23652	7.28789	8.21307	7.83291	6.73797	7.14272	8.27461
METTL22	6.78752	7.52671	7.1165	8.25417	6.88815	6.79417	6.2005	7.44551	6.29858	7.39898	6.70402	6.4908	6.49363	7.01342	7.14829	7.06959	7.02086	6.80781	6.96354	6.79337	6.90381	6.88738	6.81488	6.96939	6.74742	6.97931	7.6034	6.82564	6.5972	7.19509	6.8627	7.08203	7.04697	6.58499	6.85403	6.93189	6.60686	6.69662	6.87558	7.25868	6.89316	6.8291	7.47717	7.61495	6.99056	7.25992	7.60431	7.66077	7.30201
NFU1	7.9356	8.61602	7.51584	8.73307	7.10196	8.18057	9.13546	8.26347	7.71134	7.31971	7.24343	7.773	8.21201	7.81202	7.6297	7.85585	7.51913	6.60977	7.77765	6.87038	7.79529	6.78115	6.63706	7.34198	7.0251	8.15846	7.51768	8.46796	8.33417	7.52308	7.40971	8.15139	7.69497	7.06181	6.6504	7.53804	7.53266	7.32256	6.90636	6.24414	6.37811	6.37884	8.55033	8.59126	9.58256	9.04049	8.78366	9.13437	8.38093
QRSL1	6.99894	8.148	7.06665	6.4622	7.07824	7.60295	6.54402	6.9736	6.6715	6.8168	6.66517	6.8654	6.47638	7.26552	7.39206	8.70943	7.48971	6.3779	6.47342	6.71208	6.97401	6.17015	6.4273	6.41495	6.90207	6.96457	6.75789	7.16634	6.91087	7.10529	6.60704	6.50594	6.85644	6.35298	6.54283	5.99111	6.6899	6.88863	6.41514	6.45734	8.25372	6.30499	6.84692	7.37561	8.35081	7.86155	7.43887	8.30364	7.06693
ARAP3	7.49762	6.8345	7.11334	7.62056	7.69786	7.07582	7.17317	7.1078	7.13718	7.36309	7.06997	7.92138	7.97002	7.07711	7.50403	8.00371	7.51146	7.59151	7.41013	7.26088	7.45543	7.31462	7.43541	7.25398	6.82762	7.16649	8.0667	7.56518	7.6133	7.27426	6.97126	6.87676	7.07558	7.36122	7.77816	7.85071	7.70322	7.87846	7.06982	7.89071	7.2662	7.40298	7.63714	7.80598	6.99447	8.53388	8.84002	7.61532	6.81516
PLCXD1	8.4642	7.76474	7.89962	8.12725	8.34154	7.84051	8.43469	7.78704	7.862	6.97325	7.92316	7.09935	7.44311	7.60602	6.97084	8.05442	7.57039	7.60023	7.55014	8.20967	7.38763	8.00175	7.973	7.25189	7.78638	6.90321	7.8044	8.02178	8.32674	7.28299	8.25715	7.76293	7.39948	7.57274	7.23824	7.08098	8.21478	7.76753	7.54021	7.58144	6.66611	7.59411	8.71024	8.50144	7.48349	8.55266	8.90577	9.61533	9.0767
PCSK1N	6.44202	6.07042	6.34545	6.83731	6.29642	6.57109	6.31942	6.47032	6.23757	6.52144	6.88591	6.44061	6.72649	6.41118	6.22084	6.75168	6.93084	6.1967	6.28686	6.17813	5.85872	6.15495	6.30373	6.56195	6.37748	6.34679	6.84256	6.26263	6.33902	6.38329	6.20422	6.72714	6.45823	6.74524	6.44561	6.1639	6.27087	6.45754	7.05406	6.23572	6.25654	6.5769	6.77339	7.18467	6.74952	6.93787	10.1168	6.17341	7.19299
PCYOX1L	7.81637	7.80994	7.7044	7.71058	7.29661	7.73482	7.57649	7.93751	7.41144	7.71071	7.80892	7.29968	7.52704	7.42344	7.21054	7.76789	8.10391	7.84354	7.5979	7.25584	8.06636	8.00086	7.63159	7.99022	7.80404	7.71058	7.3668	7.54397	7.67531	7.46955	8.05336	7.34341	7.87398	8.49175	7.45065	7.79655	7.64698	8.16341	7.52992	7.38043	7.91116	8.473	8.08115	7.64669	7.52914	6.86789	6.93474	7.30979	7.35807
BRF2	8.03503	7.31542	7.11411	7.40651	7.80203	7.48555	7.75058	7.51234	7.25903	7.50128	7.83156	7.69175	7.80265	7.88516	7.34454	8.07646	7.47707	7.27432	7.5799	7.02939	7.53316	7.56867	7.134	7.806	7.58813	7.154	7.64823	8.3602	7.63095	7.84057	7.59271	7.26384	7.12958	7.04433	7.31186	7.08378	7.35129	7.19395	7.45044	6.90524	7.21948	7.29734	8.85676	10.6149	8.55733	8.27911	9.45155	9.76517	8.37794
PAAF1	8.84942	8.11122	8.00992	8.6161	7.64112	8.12071	8.34249	8.84809	8.29017	8.73214	7.9611	8.29561	8.38211	8.1938	7.59146	8.21566	7.4264	8.70272	7.97264	7.65077	8.16993	8.37713	7.77831	6.97851	8.05569	8.3753	8.65013	8.54707	8.55888	8.81386	8.42551	7.9696	8.70329	7.43604	8.02566	7.42826	8.3089	8.39098	8.73698	8.92809	7.41093	7.76438	9.21826	7.84145	8.98389	8.35187	6.71964	8.74149	10.3433
HOXC10	5.55633	6.08984	5.53624	5.46328	5.48189	5.27486	5.2936	5.46298	5.63	5.83281	5.7735	5.63943	5.38848	5.21871	5.7574	5.20075	5.85866	5.81018	5.48004	5.3801	5.44298	5.83558	5.16288	5.20492	5.75327	5.21993	5.14307	5.11786	5.17575	5.44442	6.1381	5.36913	5.05001	5.80145	6.00659	6.23788	5.17192	5.8317	5.5753	5.59024	6.4533	5.60329	4.71605	6.94546	5.28379	4.46027	6.78651	4.8195	3.85446
TMPRSS4	7.50851	6.97503	7.44996	7.73472	9.93854	7.26846	7.02051	8.73436	9.31347	6.41089	6.5049	8.83063	6.77426	10.0354	8.24698	7.45259	6.94287	8.29847	7.27516	7.58332	7.65556	8.65548	7.41617	5.90714	6.83577	8.15971	7.17795	9.01692	9.07338	8.9644	7.41712	8.24793	7.09732	7.17502	6.70424	7.54106	8.24967	6.8458	6.45375	7.71729	7.37462	7.37234	6.82533	8.36767	7.47329	9.4211	7.88915	7.09599	8.41938
PNKP	6.75699	7.33297	6.97243	7.18734	6.82721	7.45243	7.07869	7.48503	6.46907	6.41985	6.44791	6.45104	6.71061	6.94287	6.70307	7.09309	7.33144	6.79742	7.11724	6.99672	6.6898	6.34497	6.56747	6.92262	6.90212	6.48471	7.32325	7.17037	7.02768	7.63649	6.1436	7.14321	6.53325	7.04106	6.80158	6.35961	6.36252	6.81593	7.20849	7.8323	6.21103	6.49069	8.28078	8.30688	8.4125	8.912	7.25829	7.67164	7.60968
TMEM168	9.42483	10.0867	9.75786	9.17623	9.45543	9.48896	10.0015	10.0167	9.61185	10.0002	9.96073	10.2118	10.0598	9.89507	9.91664	9.97369	9.80362	8.99876	10.6518	9.42125	9.68162	9.28806	8.37364	10.1099	9.0759	9.72082	9.70831	9.47887	9.71846	10.2789	9.19067	11.4152	9.58444	10.0412	9.72337	8.75539	9.45382	9.4311	9.66089	9.82083	8.29699	8.50668	10.0004	9.81907	10.2138	9.91242	8.81263	9.53064	10.3033
KRT23	9.33713	6.71462	5.60162	8.37329	7.45921	8.73469	6.95254	6.87815	5.18639	4.76464	5.48369	8.96399	7.50422	7.7674	8.76066	4.75592	6.37238	7.46379	7.82932	6.46372	7.73286	7.24354	6.00569	6.92693	6.69012	9.18198	5.01623	9.34063	8.43806	6.81751	5.59309	8.90947	6.52516	6.94948	6.42215	6.84511	7.31859	6.50583	7.23267	7.26507	6.25171	7.1811	4.41357	9.6084	7.77906	9.21463	9.20776	5.53114	8.56268
ARID3B	6.76455	6.98096	6.77628	6.83748	7.21813	7.29739	7.00216	7.52193	7.28465	6.77253	6.96838	7.14669	6.84165	6.85018	7.11005	7.01693	7.2965	7.3697	6.7871	6.67416	7.02764	7.01855	7.35019	7.18067	7.02688	6.71738	7.42268	6.67746	6.44085	7.11793	6.95866	6.87438	7.45014	7.458	7.39292	7.53705	7.10165	6.56991	6.97579	7.03718	7.25945	7.43058	6.32147	7.21537	6.94652	7.40802	7.2797	7.24046	6.08951
TUT1	5.99542	5.95854	5.66299	6.36384	6.03167	5.75549	5.70621	6.26877	5.83971	5.9887	5.68144	5.82019	5.68406	5.7679	5.81844	5.61651	5.79766	5.86576	5.74212	6.00245	6.01586	5.63639	5.59635	5.97065	5.93115	6.02939	6.13507	5.36853	5.60725	5.77574	6.20183	6.02601	5.99886	6.16353	6.10778	5.91188	5.56033	5.40897	6.03528	6.17891	5.88856	5.84353	6.80897	6.66786	6.6551	6.0622	6.34057	6.94158	6.63295
MYO5C	10.0831	9.15344	8.59549	9.71326	8.79839	9.68507	10.5479	8.64808	8.68782	9.75856	9.3263	9.74871	10.5456	9.25265	9.32512	9.72622	8.7315	8.31018	10.1247	8.98365	9.57065	8.52772	9.44584	10.0279	9.27122	9.5739	8.36538	8.63912	9.80681	9.03184	9.47206	8.38012	9.1371	9.16693	9.35336	8.42991	8.63509	8.67315	9.0523	10.1881	8.07843	8.50837	11.8797	9.36693	9.72276	11.0406	10.6704	9.49655	9.82893
ZFP64	8.60086	9.07786	8.36408	9.35787	8.56325	8.86119	8.167	9.05183	9.00336	9.6175	9.14489	9.38407	8.77088	9.10765	8.83702	9.68368	9.2431	8.11569	10.4747	8.7134	8.45065	8.89341	8.30043	8.2809	8.5798	8.10664	9.35092	8.88575	9.154	8.57518	8.37572	8.95783	8.7402	8.08804	8.4601	8.13796	8.56542	8.23697	8.23153	7.78313	9.14375	8.10987	9.62781	9.86112	10.244	10.1384	10.1178	10.1197	10.4426
PAM16	6.60562	7.10594	6.79743	6.95221	6.71908	6.31007	6.45623	6.8668	6.61839	6.71061	6.05097	6.47359	6.76697	6.48536	6.70515	6.60713	6.69718	6.80308	6.3407	6.32668	6.82672	6.84328	6.56911	7.46889	6.90552	6.81213	7.14768	6.19238	6.88068	6.7851	6.44373	6.48562	6.94034	6.2081	6.59719	6.77047	6.47542	6.77025	6.5894	7.12737	6.01966	6.87743	7.50548	7.10644	7.35224	7.18423	7.14476	7.79143	7.63947
CUTC	6.64924	6.34414	5.86729	6.48231	6.05199	6.67283	6.10386	5.94148	6.08336	6.57181	5.77315	6.64689	6.6595	6.90098	6.19736	6.50472	6.12376	5.58905	5.73461	5.67831	5.72027	5.91614	5.95197	7.23976	6.37467	7.51528	6.46128	7.37508	7.27498	6.97904	5.5845	6.06696	6.20493	5.40059	6.66649	6.02968	6.11253	6.10914	6.61174	6.12806	6.46527	6.3547	6.99578	6.91071	6.90435	7.69533	7.40808	7.14408	6.48623
WDR91	6.98719	7.94198	7.42336	8.24712	7.34356	7.48335	8.54324	7.64677	7.70126	8.17249	7.19175	7.55284	7.08259	7.20343	7.28278	7.82431	7.21287	7.28266	8.16513	7.14765	6.70391	7.08651	7.31959	7.00703	8.20165	7.80031	6.94673	6.56766	8.06211	7.4902	6.84097	7.71817	7.31078	6.38805	7.66968	7.03411	7.90058	7.4558	7.22142	8.09054	6.46055	6.79384	7.25416	7.59972	7.71085	7.64136	7.35986	8.59643	8.12763
EFL1	8.39242	7.60681	6.71868	7.64525	6.61605	7.99424	8.05127	7.03205	8.21048	7.45969	7.41131	7.08273	7.65321	7.25153	7.53523	7.65744	7.56928	6.30393	7.77414	7.36477	7.17923	7.36578	7.12351	7.36198	7.25016	7.71213	7.71213	7.81001	7.99958	7.84712	7.44797	6.45917	7.28945	6.58495	7.11479	6.45153	7.0121	6.87664	7.50398	6.63358	6.68154	6.30869	8.52043	8.39929	7.69342	8.37423	8.73076	8.29316	7.61475
SOBP	5.42911	6.48296	5.68363	7.73785	4.95051	5.74196	5.69309	6.21576	5.32636	7.17467	5.44568	5.44464	5.90514	4.51641	6.5637	7.9555	6.15368	5.83439	5.97916	4.40674	5.64142	5.93182	6.45228	6.21816	6.72389	5.14732	6.03577	4.97462	5.87787	5.40005	7.78004	7.6696	5.6858	4.96228	5.60778	6.55392	4.53756	6.6721	6.45725	5.147	6.38747	6.55392	5.32892	6.20231	7.99521	7.77729	10.0617	7.28542	7.92047
DNAJC12	5.32276	5.63779	5.74929	5.96886	5.47473	7.09973	5.03516	5.25272	5.22313	4.99054	5.31881	5.52087	5.40067	4.68264	6.35791	5.59924	6.22921	5.71913	6.16585	5.42573	5.42276	6.05321	6.57286	6.77418	5.52541	5.60973	5.32847	4.95512	4.71316	5.22243	6.2746	6.13245	6.29744	6.36949	7.17985	6.58868	5.42877	6.44686	5.52787	5.27161	5.75022	5.48381	7.46149	6.53263	7.14051	6.00786	7.36867	5.29487	6.18987
RMI1	8.33175	8.54598	7.77205	7.44688	7.90539	8.0945	8.7545	7.18017	7.41147	8.2129	8.34331	6.98005	7.92096	8.69243	7.37486	8.16209	8.04075	7.1922	8.08082	7.11343	7.35291	7.16931	7.07888	7.25106	7.57329	8.41894	8.01883	7.61319	8.15561	7.93783	7.49131	6.6387	6.77251	6.87186	6.98367	7.09345	7.81928	7.1952	7.42534	7.02346	7.31387	7.46645	8.17527	8.17726	9.16474	9.28733	9.20793	9.17985	9.83262
FHOD3	4.90973	5.86047	5.78658	5.56954	5.16902	5.03351	5.28536	4.99093	5.56754	5.01708	5.18696	4.95682	6.03364	5.06163	6.15679	4.72179	5.39859	4.86172	4.89214	5.18796	5.87653	5.05911	5.29399	5.16809	5.49132	4.85586	5.20721	4.65708	5.38201	5.20673	4.76494	6.12412	5.47442	5.8261	6.24009	5.1688	5.30725	6.12697	6.1702	5.27559	5.43717	5.35665	3.83866	6.26859	5.58754	5.59658	5.91141	5.14472	5.05469
SDHAF3	6.77235	7.57299	7.34153	8.15291	7.47016	6.7906	7.69943	7.81156	6.90103	8.72245	8.0204	6.51562	7.01983	8.35656	7.11986	7.4479	7.31881	6.7568	7.53059	6.69899	6.45165	7.27521	6.92004	7.1472	6.40778	7.75065	7.65142	6.85556	6.87567	6.9147	6.82547	8.00371	7.28427	6.19	6.53308	6.46538	7.09149	6.59894	7.19429	6.50915	5.28812	5.94302	7.52582	7.81813	8.85379	7.50641	8.09686	7.45143	8.92832
MRPS17	8.68986	8.36632	8.21505	9.27373	8.2795	8.39212	8.02097	8.64675	8.56411	8.87304	8.75057	8.18958	8.5431	8.55663	8.05955	8.39069	8.714	8.17771	8.13498	8.8889	7.80762	8.41129	8.12884	8.55517	9.07046	8.21709	8.52583	9.61558	8.22267	7.73877	8.42395	8.94986	8.35815	8.75676	8.10608	7.42597	8.29908	7.64463	8.35881	8.01762	7.44003	7.57323	8.97719	9.66472	10.3794	9.71855	9.71985	9.81646	9.23589
PUS7	8.75833	9.10619	8.75971	8.53518	7.47107	8.10544	9.10297	8.12784	9.22351	9.57977	8.31758	9.07002	8.61383	8.18626	8.07329	9.5557	7.81781	7.9748	8.90578	8.55607	8.2726	8.47995	8.23227	8.45066	8.17126	9.09374	8.38005	8.24745	9.27225	8.94814	6.9493	9.11789	8.49286	7.74537	8.98989	7.38533	8.22304	7.88847	8.35231	8.49108	7.01928	7.65872	9.46577	9.18046	9.7965	8.89879	8.62125	10.6976	9.98954
SLC2A8	6.57925	6.99862	6.30654	6.19634	7.21709	6.41815	6.58248	6.86839	5.84189	6.81929	6.74817	6.46624	6.00011	6.90876	6.63047	6.40918	6.46624	6.8322	6.51789	6.47733	6.74124	6.91847	6.16799	6.21638	6.57317	6.33059	6.57576	6.65911	6.53501	6.50416	6.99828	6.32757	6.55865	6.48325	6.43787	6.70272	6.71935	6.47463	6.46239	6.23106	6.4529	6.30526	6.87275	6.93319	6.82346	6.23644	7.05386	7.09714	7.31922
DDX60	9.00526	9.82333	7.34235	6.77074	7.31001	10.0671	8.50311	6.69666	9.57532	9.06062	7.08092	7.59947	8.23068	6.83821	8.64549	5.43573	8.08028	7.06129	8.25685	8.11305	7.95469	7.9358	6.06795	7.42651	8.91617	7.52019	5.63717	8.10853	9.39445	8.19344	9.25651	9.62189	7.15668	5.94318	7.69141	7.48371	8.90524	6.89957	7.30416	6.41575	5.46414	7.42777	8.39125	9.25768	10.5018	10.6458	6.38245	8.66804	8.19569
SLC35E3	8.59102	8.51364	7.98472	7.89227	8.01955	9.09598	8.38369	8.11913	8.66418	9.10513	9.67607	8.6948	8.40349	8.26274	8.80349	9.51908	8.5355	7.33385	9.58742	6.82536	8.42151	7.63706	7.92869	7.20809	7.77032	8.27616	8.57965	7.98936	7.74918	8.14018	7.96505	7.86906	8.28292	7.07038	8.58857	7.3977	7.70962	7.31799	8.8038	6.75869	9.2988	8.28119	8.8945	10.1831	9.4942	9.27959	9.41129	9.66356	8.59931
SLC30A5	7.82895	7.26653	8.15448	8.31648	8.6473	8.32353	7.70733	8.114	6.99639	8.89454	7.97172	8.50204	8.81496	9.12155	8.60604	8.84565	7.82362	7.97621	9.53004	8.80636	7.06423	7.59598	7.3216	8.67936	7.15226	8.7158	8.18054	9.43212	7.78428	7.61652	7.65874	8.20851	7.81109	8.18548	7.94279	6.76147	7.966	7.79942	7.72135	7.08617	7.36084	7.27849	10.1382	8.36701	10.5769	9.21191	9.89809	9.44223	9.25667
HEATR6	7.74563	7.30173	6.7583	8.78225	6.79937	8.11656	7.1984	7.19996	7.25208	8.0768	7.23734	7.05553	6.44216	7.87558	6.91364	7.58188	7.24033	6.68996	7.48032	7.29396	7.698	7.45697	7.11835	7.52029	7.50245	8.29267	8.07797	7.67078	6.86476	7.00821	7.76126	7.26521	8.71007	7.35908	7.93552	6.73297	7.238	7.2603	8.21153	7.54038	6.81069	7.20715	7.09208	7.68843	8.22789	8.88299	8.38564	7.74563	8.56303
PLGRKT	7.32776	8.66698	6.61576	7.31935	6.67716	7.09302	7.30379	6.38992	7.20385	6.4801	6.62938	6.36264	6.84022	7.77888	7.01738	6.53925	6.61998	6.22766	6.64371	6.4543	6.6642	6.58997	6.97921	6.1449	7.63198	6.76851	6.68479	7.07688	8.00558	7.48282	7.68392	6.42457	6.28443	7.05391	7.9612	6.2496	7.21517	6.65025	7.59383	6.82274	6.77248	6.50973	8.9698	7.28549	8.79888	7.53627	7.64104	7.51492	8.69391
MRM3	6.77362	7.4408	6.8966	10.4105	6.68137	7.57497	8.3727	7.09226	7.18121	7.92142	7.53339	7.10133	7.28158	7.83488	6.87267	8.32645	7.49575	7.00915	8.09713	6.67052	6.40743	7.20951	6.85015	6.36955	7.40644	7.67623	7.93236	8.15341	8.04714	6.93753	7.26939	7.7606	7.83543	7.34793	6.72163	6.93369	7.35123	7.84114	8.22949	6.97903	7.27885	7.2067	8.09556	8.30927	8.37424	7.69179	8.10467	8.29112	8.46534
TFPT	6.94393	7.2981	7.29166	7.04101	7.07973	7.3647	6.89038	7.03837	6.42177	7.2022	6.8225	6.28049	6.67198	6.81891	6.87729	7.09676	7.12792	5.82435	6.75717	7.242	6.54978	6.82539	6.97814	6.34049	6.82822	6.79811	7.21308	7.632	7.26329	6.44243	6.52469	6.7047	6.56673	7.00544	6.47141	6.59617	7.06235	7.44563	6.59021	7.00735	6.16599	6.21702	8.16613	7.99698	8.49275	8.09788	8.06832	7.19996	9.13737
POLR1E	7.70601	7.36768	7.38948	7.81958	6.61977	7.41168	6.88987	7.15403	6.56498	7.94846	6.51219	6.95396	8.22078	6.82798	6.36512	7.02816	6.86916	6.43425	7.1003	6.6423	6.29574	6.23706	6.75683	7.24669	7.56562	7.19129	7.19172	7.01754	7.73219	6.53514	6.86956	7.11094	6.9233	7.06397	7.85855	6.32104	6.5493	6.94681	6.61043	7.28922	6.17141	6.11186	9.18429	7.28266	8.13791	7.13817	6.20269	7.74492	8.73721
FAM206A	9.62913	8.86982	9.38518	9.05722	9.22	9.05941	9.26	9.28668	9.52881	9.17878	9.46786	9.13705	9.80934	9.48073	9.66387	9.24293	9.54566	9.21919	9.56739	9.36474	9.80552	9.04441	9.07416	8.886	9.23587	9.3685	9.44534	9.26589	8.6966	9.20621	9.41877	9.46797	9.33884	9.44628	9.53876	9.36441	9.49974	9.11238	9.43387	9.07696	9.44045	9.13062	8.95573	9.48425	9.86341	8.76971	9.9097	9.77954	9.79423
TMEM140	6.95332	6.67753	6.78503	6.80943	6.78375	7.47553	6.53974	6.51997	7.46807	6.36124	6.30538	6.80868	6.28211	6.12748	7.37727	5.84697	6.53114	7.08085	6.37966	6.91983	7.29954	6.76456	6.50125	6.95733	7.80317	6.65803	6.23524	6.43618	6.67776	6.99394	7.25177	7.03391	6.8789	7.0488	6.86983	7.38276	7.31765	7.48686	6.83727	6.84425	6.91935	7.04501	6.35685	7.49208	6.99746	6.81105	6.98497	6.47715	6.7868
DSCC1	7.28471	8.15653	7.46017	6.60644	7.75732	8.51061	7.61085	7.74491	8.29917	8.45188	7.14292	8.13721	6.3566	7.68775	7.23327	7.89258	7.8959	7.63896	7.82183	7.91983	7.4929	7.79763	7.91906	7.7802	7.27288	7.6468	8.14141	8.06364	7.37869	7.23844	6.83894	7.08185	6.88567	6.54724	6.40952	7.6188	7.22066	7.44889	7.83288	6.52014	7.78341	7.1444	7.64121	8.05466	8.91942	8.49908	8.77588	8.59696	9.29303
FASTKD1	8.63142	9.19484	8.20247	9.51685	7.0141	8.47227	8.56429	8.40604	8.72111	10.0421	8.17731	8.4874	8.57853	8.76353	8.83318	8.87466	8.21535	8.7293	8.69027	8.67722	8.58242	8.33901	7.63439	7.67776	8.81644	8.13796	8.44717	9.97331	9.85489	8.90485	8.31303	9.29021	9.00554	8.26437	8.65889	7.77463	8.59828	8.53003	8.47748	8.43051	7.61633	8.26184	10.2206	7.58935	10.5303	10.7439	8.64517	9.84289	9.39535
MIS18A	8.26927	8.24897	7.8053	7.14174	6.9014	7.93214	7.53889	8.8252	7.97032	8.79683	7.57644	8.13207	7.46057	7.96565	7.59719	8.07497	8.11156	8.13044	8.62648	8.12506	7.43138	7.55368	7.51944	6.40482	8.11247	7.72731	8.13886	8.19425	7.01243	7.73962	7.03081	6.69471	7.66172	7.2307	7.77808	6.62327	7.99705	7.48039	7.8838	7.87874	7.6375	7.55954	9.40485	8.39624	9.31531	8.42661	8.66718	9.27717	9.43035
TMEM59L	5.44389	5.4876	5.66284	5.90239	5.64251	5.41456	5.73508	5.70649	5.63937	5.7668	5.65671	5.61318	5.68095	5.83322	5.50372	5.65422	5.49624	5.7419	5.71668	5.80127	5.66071	5.7037	5.75087	5.75532	5.71494	5.79554	6.01765	5.98891	5.65324	5.89991	6.04695	5.77098	6.01505	6.23175	5.96546	5.53921	5.55601	5.36231	5.52992	5.80275	5.39035	5.2921	5.95811	5.71175	5.5871	5.64011	6.02088	5.49278	5.72007
NDUFAF4	8.34992	8.96831	8.39914	7.64039	8.49744	8.46727	7.80576	8.46738	8.41334	8.14408	8.46612	8.55786	7.577	8.11115	8.98966	8.90878	8.50642	8.33845	7.27769	8.46673	8.02432	7.8465	8.08796	6.97533	9.47272	8.49961	8.52139	9.29245	7.91699	8.569	8.1256	8.10317	8.67284	7.75993	8.17222	7.88193	7.59836	7.79804	7.82041	7.44692	7.99867	7.30187	8.36297	8.92826	9.42861	10.0736	9.84725	10.2126	9.2593
NUP43	8.51925	9.00432	7.39468	8.84677	8.46963	8.41751	8.41479	8.65521	8.71764	8.96762	8.07159	8.39855	7.95329	9.56307	7.26828	8.5802	7.22526	8.18129	8.24735	8.87098	8.52333	7.95512	8.20357	7.47816	8.81158	8.77594	8.68744	9.20502	8.20863	7.15115	8.35429	8.24258	8.48692	7.33302	8.68744	6.85212	7.7878	8.10229	7.97211	8.58222	7.62674	7.94796	8.87907	9.25149	9.55287	8.78468	9.98491	10.5633	9.0326
LDAH	6.96557	5.88206	6.77546	6.66643	6.44326	6.59023	6.61211	6.68262	5.72065	6.45943	6.16258	5.34128	6.68326	6.64719	6.43113	4.75236	7.32652	5.26927	7.11981	6.06587	5.09299	6.41576	6.45742	5.27887	4.57747	8.39753	6.40277	6.54078	6.38844	6.85476	6.92289	6.35761	6.5329	5.20766	5.12274	6.7951	6.7008	6.15324	6.2079	5.74313	6.5533	6.37148	7.84329	7.53143	7.62263	7.99268	4.93924	9.18707	7.72319
C14orf93	5.61294	5.69805	6.23278	6.11464	6.03454	6.17369	5.51017	6.18551	5.89576	5.43541	5.86604	6.28194	6.51342	6.25238	5.58497	5.9493	6.23255	5.80965	6.39274	6.09409	5.97236	6.20243	5.93899	6.11482	5.8966	5.75089	6.02637	6.17965	5.91343	6.59916	5.47585	5.42248	5.90413	6.1133	5.79997	5.51547	5.9565	5.75108	6.00515	5.84942	6.27624	6.09467	6.32947	6.57432	5.68161	4.94314	5.44103	6.91096	6.23807
INAVA	8.64844	8.87669	7.98074	9.26144	9.37579	8.18611	9.3644	8.24089	9.71096	8.71274	9.83648	9.41489	9.09055	8.81745	7.31403	10.1943	8.19811	7.82124	9.32459	8.74573	8.3433	7.54655	7.73447	8.69435	8.11501	8.50257	7.49987	9.1569	9.51105	9.25865	6.77004	9.01902	9.01289	6.24622	7.7648	7.59991	9.16133	7.87224	6.28415	8.91501	8.07301	8.1118	10.1613	9.14666	8.93952	10.3918	9.61029	9.34801	9.31746
PLEKHA4	6.51033	6.96797	7.35535	6.24876	6.56908	6.90942	6.78893	6.44195	7.03621	6.65812	6.49407	6.51737	6.78597	6.47032	6.92615	6.52029	6.92025	6.51544	6.43222	7.1302	6.91833	7.2872	6.8091	7.2345	7.30963	6.60062	6.94935	6.92296	6.61619	7.07592	7.026	6.80089	7.49097	7.58542	7.30989	7.60743	7.40688	7.05445	6.76903	7.51823	7.53769	6.7242	7.62534	6.97334	6.69151	7.16003	6.46942	6.99928	6.73092
GALNT11	9.71183	9.17569	9.02215	9.70262	9.02177	9.17746	10.1369	8.58118	10.0712	10.0642	9.80081	9.89098	9.68579	8.26529	9.21538	9.83016	8.83305	8.6169	9.69224	9.21311	9.17677	9.09166	8.29367	9.62458	9.14105	10.3981	8.97814	9.52576	11.0175	8.34526	7.76305	11.0976	9.24433	9.17838	9.18421	7.76222	10.0453	9.68326	9.66933	10.0054	8.67204	8.87007	10.6407	10.5239	10.4368	11.145	9.97658	10.795	10.7188
PLAC8	5.91676	5.45302	5.86325	6.43887	4.72045	5.69123	5.93227	5.23693	5.80234	4.92316	5.42006	5.70455	7.37631	5.24556	5.70711	4.86323	5.22528	5.23883	5.22267	5.39834	6.0723	5.71683	5.10255	5.03334	5.2065	4.92708	5.27366	5.05816	5.41998	5.9854	5.62765	6.00266	4.96136	5.5827	5.28985	5.86664	5.50413	5.66582	4.74689	6.64723	5.33687	5.34709	4.8593	5.16045	5.86548	5.9474	4.1963	4.94246	6.07557
FASTKD5	7.95428	7.85542	8.57888	8.3578	7.61308	8.31083	6.86279	8.04159	7.26848	8.37324	7.71214	7.15822	7.23784	8.20288	7.65159	8.11042	7.60026	7.58319	8.47538	8.09485	7.11179	7.51679	7.74821	7.21612	7.76048	6.8208	8.24929	8.30043	8.46421	8.38784	7.07663	7.57977	7.06985	7.46763	7.79915	6.53586	7.09025	7.05343	6.98054	7.04083	7.39158	6.89955	8.46859	8.56668	8.80198	9.32785	9.26022	8.36024	8.84046
PIDD1	7.35183	7.46203	6.83905	7.18792	7.11047	7.02075	7.2793	7.33343	7.0564	7.23537	7.12023	7.15819	7.57659	7.25961	7.3085	7.22898	7.30553	7.12525	7.48694	6.96917	7.2593	7.19712	7.02385	7.35413	7.12239	7.22245	7.35587	7.16298	7.77735	7.49598	7.7214	7.5628	7.16804	7.75657	7.02008	7.30707	7.50842	7.33288	7.21276	7.43779	6.93242	7.36861	7.69176	7.11047	7.52871	7.24679	7.1437	7.59309	7.34866
HS1BP3	7.67772	7.36794	7.2489	8.09378	7.19722	7.31158	7.14721	7.36984	7.14109	6.67586	7.26457	7.6933	7.43429	6.94889	7.12128	7.52441	7.38553	7.18105	7.23959	7.12527	6.82911	7.13601	7.10234	7.46472	7.19999	7.83667	7.1851	6.99126	7.39335	6.67584	7.24196	7.19765	7.11768	7.50381	6.96185	7.01007	7.37684	7.13057	7.23602	7.08313	6.66333	6.897	7.68582	7.60858	7.47425	7.58266	7.02949	7.6116	7.3382
RNF121	6.77223	6.37374	6.61116	6.12097	6.42056	6.49389	6.85256	7.27956	6.88459	6.54894	6.27008	6.30862	6.39797	6.79729	6.69975	6.67667	6.2617	6.79743	6.54721	6.73549	6.5813	6.66692	6.31343	6.40044	6.46491	7.00111	6.9522	7.06924	6.86061	6.44911	6.90041	6.22953	6.47074	6.43244	6.31109	6.65844	6.87916	6.36741	6.62156	6.41315	6.4324	6.42843	7.69142	6.95619	7.15688	7.15607	6.57832	7.33659	7.18245
C12orf43	7.25602	6.78112	6.56305	7.01322	6.00714	7.77392	6.35275	6.50866	6.69324	6.94119	6.78184	6.47386	7.29932	6.73291	6.93531	7.62239	7.58817	6.7659	7.47184	6.21428	7.0577	6.75859	7.34949	6.15643	6.50422	7.06154	7.8275	7.0624	6.32404	5.78715	7.27516	6.03817	6.58661	5.96839	7.03322	6.11725	6.43678	6.77516	6.48436	6.02537	6.87364	6.42082	8.0748	7.60886	8.15543	6.73119	8.58654	9.16915	7.97471
AP1AR	6.08397	6.60347	5.41128	4.91916	5.19825	5.96968	6.21224	5.47039	4.74162	6.89535	6.26117	6.05638	6.40947	6.46771	5.66327	6.29173	5.33945	4.41223	6.61746	5.55218	4.87759	5.50716	4.32774	5.33218	5.75625	5.33566	6.10376	5.41128	5.67854	5.57336	4.50334	5.0891	5.57174	5.97196	5.05735	4.23288	6.27237	5.31158	5.84394	5.15556	5.22221	5.68531	5.35143	5.72123	6.64053	5.18934	6.01179	5.78327	6.26337
CD248	6.63506	6.82954	6.93071	6.4922	7.0202	6.93135	7.06314	7.07243	6.92044	6.79709	6.77232	6.89769	7.19717	6.61813	7.6635	6.84558	6.89936	7.03955	6.58269	7.11881	6.92576	7.01524	7.34796	6.90644	7.01665	6.68698	6.86279	6.42363	6.65526	6.82954	6.80698	7.02438	6.63639	7.46904	6.69566	7.44623	7.36238	7.33322	6.67145	6.90802	7.44733	7.16545	5.96322	6.70779	6.30723	7.20645	6.96736	6.5193	6.65381
MYO9A	8.20228	7.97835	7.59714	8.13268	7.69523	7.90432	7.94668	7.66625	7.88741	7.65048	7.48202	7.74292	7.67017	7.56095	7.71935	7.5737	7.58953	7.46311	7.56555	7.66162	7.73802	7.65952	7.49618	7.85649	7.46708	7.67889	7.13924	7.34032	7.72441	8.42111	7.6461	8.09272	7.89371	8.01932	7.89738	7.51342	7.41509	7.47824	7.59591	7.93592	7.43434	7.62388	8.68139	7.42921	7.77674	8.56908	7.324	7.82652	7.73425
TMEM267	6.7144	8.40191	7.20721	7.78289	8.58491	7.43923	6.7206	6.1743	7.05225	8.07498	7.27341	7.58646	7.37804	7.79797	6.59215	7.27303	6.24746	6.18581	8.10426	6.63802	6.00518	7.09589	7.28648	6.8854	7.65118	8.49842	6.24489	8.00979	7.24445	8.41776	6.41934	8.00221	6.86515	6.77208	6.63222	5.87236	6.16472	6.80554	5.59579	7.38796	6.06539	6.30593	7.8238	8.25432	8.72469	8.27345	9.03787	8.87419	8.99056
TPRKB	8.84754	8.44594	8.6218	10.2732	9.035	9.00356	8.75599	9.50874	8.56909	8.75106	8.35276	9.02643	9.03968	9.4535	7.98946	9.35132	8.80341	7.80572	8.77699	8.42384	7.69161	7.95951	8.71819	8.464	8.30712	9.13945	10.2452	9.0673	8.04546	9.5246	8.58402	8.91185	8.43748	7.90003	8.5373	7.96489	8.38276	8.17675	7.68948	7.41897	7.38978	7.99094	9.98326	9.56985	10.1959	9.78915	10.491	10.599	9.97013
OPN3	6.21027	7.83716	4.53136	8.31192	7.81997	7.32484	8.82532	7.22257	7.24904	6.94307	9.22824	8.64933	8.40311	8.09877	7.12742	9.07817	7.28955	5.99477	7.89981	9.07528	6.91995	8.00437	7.87478	8.54188	7.28793	7.48119	6.07606	7.67327	7.05891	6.94957	7.65121	8.30605	7.2855	7.59647	7.28793	6.69572	8.79179	7.7482	6.61358	7.97481	7.04565	8.01549	9.94169	6.54517	10.3227	8.76922	9.10509	9.16919	7.67698
PARP16	7.49686	6.63511	6.54239	6.93569	6.23355	7.08864	7.17687	6.57221	6.61879	6.60297	6.62892	6.69809	7.53456	7.83165	6.70173	6.77277	6.6463	6.65362	7.2638	6.46568	6.47055	6.87664	6.601	7.25319	6.46509	6.99704	7.00254	6.55492	7.27126	6.80399	7.14838	6.98789	6.86919	6.82142	6.67199	6.9097	6.75409	7.02322	6.98064	6.52944	6.22595	6.54858	7.83884	7.30068	6.83248	8.01946	7.61273	7.66167	7.16604
RNF34	9.07643	8.34259	8.43265	8.64946	8.29387	8.9402	8.62388	8.4101	8.63543	9.2381	8.82812	8.23586	8.53467	8.69735	8.25536	9.34674	8.59713	7.71361	9.54029	7.58403	7.95566	8.35372	8.4429	7.93095	8.303	8.55593	9.03225	8.71179	8.03099	7.96692	8.90775	7.6953	8.35556	8.00039	8.29619	7.45505	8.05737	8.40642	7.81035	7.90324	7.75129	7.92544	9.98586	9.19727	9.79628	9.03052	9.84284	10.3012	10.1685
CEP70	7.38275	8.69327	7.2147	7.98016	7.39393	8.12755	8.2995	7.47687	6.1774	7.97132	7.98534	8.84823	8.1631	7.87347	8.22174	8.66204	7.27739	6.97825	8.79798	7.29066	7.31943	7.03846	6.77799	6.71167	8.07249	7.9046	7.92961	8.79585	7.06113	8.38101	8.08146	7.93224	7.52075	7.2614	7.61917	6.2638	7.9374	6.86289	7.61496	7.83416	8.23337	7.55392	8.09178	8.33998	9.33895	7.71346	7.69998	9.31063	7.78944
RRP15	8.4729	9.22432	9.15002	8.78188	9.07328	8.47999	7.86923	8.50535	8.37564	9.1771	8.52532	8.7569	8.66167	8.87329	7.31799	9.0801	9.05353	7.0171	9.135	9.14484	6.84609	8.99485	7.91697	7.99733	8.68834	8.60432	9.39969	8.07731	8.44578	8.05288	8.17401	8.10331	8.77256	7.42611	8.53061	7.04679	7.41713	8.45797	8.04617	6.91509	8.20318	7.406	9.35143	9.10275	10.0763	9.18098	9.77892	10.2957	10.2014
MORC4	6.30103	6.15927	5.96736	6.47845	7.08005	6.29526	7.3801	6.33798	6.39696	6.31222	7.38113	6.16111	6.84611	6.80831	6.93225	6.35158	6.83232	6.96781	7.08778	6.83674	7.06978	6.50137	6.2835	6.01608	6.49798	7.47421	6.3387	6.53363	5.83891	6.00543	6.92851	6.24909	6.47301	7.41998	6.33474	6.24011	7.09119	7.07544	7.82963	6.09979	7.24905	6.39503	6.86383	7.08454	6.93518	7.86704	7.35638	6.53929	7.27359
CORO7	5.38445	5.67387	5.56348	5.24234	5.57878	5.90672	5.46895	5.59774	5.39407	5.5467	5.45928	5.82823	5.86601	5.65789	5.48997	5.66812	5.51178	5.8034	5.6449	5.5973	5.60214	5.87369	5.86196	5.8227	5.64405	5.91505	6.11371	5.75341	5.37238	5.74636	5.99493	5.75555	6.07954	6.61906	6.01198	6.1137	5.61448	6.36978	5.72478	5.87369	5.45284	5.87564	6.16463	6.03263	6.03241	5.6672	6.24462	6.03351	5.96295
REPIN1	9.97251	9.44475	9.74442	10.3199	9.23218	9.5258	10.0697	9.68679	10.3917	9.81915	9.87484	9.29145	10.2926	9.65523	9.40856	10.0027	9.43869	9.34501	10.1547	9.69563	9.65762	9.55564	9.0728	10.1479	9.59916	10.0464	9.88742	9.70398	10.5285	9.73038	8.64001	10.4612	8.98489	9.12823	9.3881	8.55332	9.33347	9.37671	9.28284	9.86048	8.44588	8.62327	11.2527	10.8314	11.6208	11.6181	11.0738	11.8938	11.8293
THNSL2	7.02352	6.3788	6.55327	7.40529	5.99515	7.03351	7.12515	6.70737	6.76907	6.58141	6.29651	6.48907	7.38881	6.95078	6.56013	6.81621	6.87542	6.74128	6.70576	6.61556	7.35349	6.35869	6.91185	7.19403	6.28229	7.65333	6.56748	7.04106	7.28573	6.26126	7.26887	7.13457	6.60571	6.91261	6.73222	7.0776	6.77913	6.2563	6.78655	7.14579	6.33225	6.26746	7.20373	7.76107	7.72967	7.58135	7.63174	7.96829	6.71762
RHOF	7.91401	7.89305	8.23737	7.72384	8.70896	7.13061	7.84145	8.24069	7.81489	6.74443	7.34721	7.51265	8.05603	7.25362	6.98235	7.33669	7.47832	8.17269	7.3557	7.9773	7.82323	7.12427	8.09371	8.08182	7.86662	8.25518	7.23062	8.16853	7.30277	7.68594	7.42464	7.57621	7.99892	7.2843	7.28572	7.17692	6.72769	6.82348	6.54558	6.74951	6.85797	7.15401	9.44619	8.28051	8.45215	8.22359	7.67214	9.88797	8.27074
PKNOX2	6.11751	6.23663	6.39602	5.96935	6.45043	5.99997	6.08158	6.29556	6.25161	5.74313	6.12571	6.2327	6.01594	5.8815	6.04967	6.28625	6.32079	6.26468	6.39379	6.27922	6.42192	6.41147	6.28247	6.13603	6.10549	5.70447	6.00124	5.95603	6.20339	6.18073	6.23763	6.09606	6.4387	6.52054	6.54108	6.32461	6.45885	6.08071	6.53477	6.22064	6.04065	6.65739	5.45614	6.10367	6.12494	5.33402	6.46711	5.95561	6.04712
ZNF668	6.21787	6.2948	6.41764	6.11687	6.42992	6.42062	6.37071	6.38204	6.27965	6.23657	6.5296	6.53515	6.15618	6.67363	6.54092	6.49288	6.54092	6.54092	6.29387	6.34115	6.26221	6.80689	6.8056	6.51642	6.61258	6.36279	6.60816	6.6655	6.06544	6.60439	6.3964	5.79247	6.54092	6.64598	6.30564	6.10135	6.08748	6.77004	6.72845	6.53738	6.18657	6.48288	7.11086	7.2767	6.61925	7.26408	6.64208	6.89896	6.97767
PIGN	7.59288	6.65502	5.43225	7.02827	6.1273	6.34122	6.01559	6.37828	6.60249	8.83726	6.89514	7.78445	7.04028	6.90284	6.59221	8.51409	6.68503	6.43588	7.00338	6.68407	7.26321	7.05185	6.73242	6.63527	6.72194	6.47122	6.58215	6.71904	6.84185	6.65274	6.77238	6.49706	7.29759	7.4389	7.0529	6.04538	6.59917	6.81127	7.0265	6.04538	6.48612	6.84944	7.82984	7.20992	8.57426	9.14506	6.83051	8.90333	7.54925
CSGALNACT1	4.7331	5.30712	4.93506	5.06037	4.96585	5.1221	5.2251	4.98945	4.44941	5.51826	5.20631	5.09318	6.23974	5.2666	6.2163	4.52289	4.52494	5.04693	4.84694	4.59303	4.98907	4.71183	5.0921	6.39863	4.92431	4.72586	4.74893	4.62927	4.45141	4.49151	5.3334	7.03909	4.94726	5.76816	5.42554	5.28589	5.16111	6.18364	4.93667	4.89187	4.80004	5.21307	6.27867	4.26548	7.62415	6.30841	5.69797	5.70333	4.93362
ZNHIT2	6.677	6.63396	6.52301	6.01595	6.33033	6.25474	6.11177	6.22999	6.23731	5.98847	6.39241	6.08246	6.65609	6.41432	6.41121	6.05632	6.25113	6.19283	6.31858	6.81966	6.25324	6.45913	6.75669	6.56353	6.63739	6.85569	6.83658	7.23363	6.43957	6.9642	6.62355	5.50517	6.56095	7.03936	6.78961	7.07363	6.23442	6.45776	6.51354	6.69597	5.93262	5.91664	6.88099	7.19527	7.5572	7.17492	6.94875	7.1422	7.9786
HPS6	7.44151	7.14469	7.48741	8.06496	7.24887	7.69315	7.47138	7.14731	7.46544	7.57356	7.05281	7.54552	7.51961	7.60866	7.14632	7.44151	7.43986	7.43199	7.42526	7.0182	6.81329	7.35781	7.19204	7.5635	7.5534	7.08277	7.66091	7.78653	7.63147	7.59025	6.87176	7.23153	7.36542	7.12104	7.21045	6.85164	7.25476	7.02813	7.3244	7.07679	7.1296	7.07852	8.46101	8.18225	7.62206	7.56021	8.0687	7.75773	7.72933
NPR3	6.97553	8.3922	6.67937	7.52538	6.56217	7.01859	7.30844	6.48233	6.38327	6.62196	7.89707	6.79585	7.71101	6.66662	7.00418	6.48019	6.70082	6.66316	8.56436	6.10581	6.18186	6.91389	6.27037	6.9951	8.88513	5.96466	5.89021	6.45167	7.5144	6.51978	6.36672	7.22046	6.28158	5.97119	7.21847	6.34932	6.3528	6.96681	6.32723	6.26945	6.24551	6.68509	6.49771	6.75206	6.70543	7.56866	6.06861	6.094	6.95755
SRBD1	7.35859	7.01634	5.91728	6.43216	6.80994	6.80949	6.54626	6.79002	6.28466	6.63343	6.58306	6.54857	6.48837	7.75295	6.44286	7.74304	6.95525	6.77865	7.03862	6.4419	6.67417	6.22586	6.44265	6.32641	6.56973	5.97653	7.3824	7.17438	5.89926	6.54129	6.18714	6.25986	7.42663	6.78691	6.92379	6.8007	6.72972	6.60465	6.33869	6.29117	6.34673	6.67609	6.71559	7.67803	7.93356	7.59782	7.92236	7.99669	7.0596
TINAGL1	6.83597	6.76951	6.88133	6.61457	7.08901	6.32217	6.85126	6.66859	6.60334	6.36944	6.51187	6.61834	7.24773	6.58005	6.42599	6.66653	6.44748	6.75008	6.59077	7.06517	6.39258	6.60317	6.59565	6.65439	6.59647	6.88221	6.69024	7.06508	7.05672	6.68852	6.84987	6.88019	6.76134	6.91002	6.75333	7.08897	6.97148	6.95979	6.68158	6.813	6.22527	6.509	6.68426	6.73157	6.58644	6.68314	6.96765	7.16365	6.87902
LYVE1	4.91588	5.25044	5.18837	5.45777	5.27242	5.25564	5.2811	5.20178	5.25869	5.1866	5.21752	5.20716	5.24746	5.19971	5.24268	5.01138	5.18929	5.76213	5.17504	5.25539	5.314	5.57323	5.18021	5.28603	5.32065	5.14431	5.11453	5.45184	5.15404	5.3666	5.50388	5.61297	5.65241	5.7584	5.7777	5.39118	5.21019	5.55162	5.09976	5.58681	5.62881	5.56498	4.90336	4.28471	4.46891	4.19423	4.03783	4.33669	4.28735
WDYHV1	8.27081	9.03149	8.33422	8.06627	7.5497	9.04902	8.56842	9.24911	7.99155	8.9414	8.03604	8.43654	7.8559	8.65251	7.77427	8.39169	8.90927	7.93457	8.67083	8.20899	8.23712	7.63757	7.99793	7.94041	7.36414	8.69014	8.57748	9.38389	8.87833	7.20078	7.34527	9.08289	7.60748	6.94142	6	8.94816	8.04311	7.64584	7.89619	6.70166	7.64626	7.31339	9.0956	9.00233	10.0131	9.83284	9.05043	9.40622	10.0869
LAGE3	8.54555	8.32189	8.78377	7.93811	8.0907	9.05754	8.25236	8.4628	8.01504	8.05047	9.51063	7.44285	7.52026	9.07114	7.91789	8.24025	8.00246	7.5593	7.24428	8.65896	7.48543	8.68027	8.9634	7.88125	8.52104	9.50775	8.01248	8.33239	8.40251	7.77553	8.86239	7.38886	8.7035	8.87617	7.65141	8.14743	8.70189	8.93956	7.57046	7.83538	7.56327	7.59152	8.92397	9.84804	8.58994	9.11538	7.74484	8.78859	10.3897
[truncated: 8,735 more rows]
[truncated: 64 more columns]
